# Supplementary material for: Gold-catalyzed highly regio- and enantioselective vinylcarbene insertion into O–H bonds of 2-pyridones
Source: Royal Society of Chemistry journal article supplement (doi:10.1039/c6cc10246h), 2017-01-01
Supplement: c6cc10246h1.pdf [file c6cc10246h1.pdf]

# Gold-Catalyzed Highly Regio- and Enantioselective Vinylcarbene Insertion into O-H Bonds of 2-Pyridones

Daorui Huang, Guangyang Xu, Shiyong Peng and Jiangtao Sun\*

*Jiangsu Key Laboratory of Advanced Catalytic Materials & Technology and School  
of Pharmaceutical Engineering & Life Science, Changzhou University  
Changzhou 213164, China*

Email: jtsun@cczu.edu.cn or jtsun08@gmail.com

## Table of Contents

1. General Information
2. Preparation of substrates
3. Initial investigation of Scheme 2
4. General procedure for table 2
5. Control experiments for Scheme 3
6. X-ray structure of **3q** and **5f**
7. References
8. <sup>1</sup>H NMR, <sup>13</sup>C NMR and Chiral HPLC Spectra of compounds

## General Information

All of the reactions were carried out in flame-dried tubes under argon atmosphere. Solvents were dried prior to use. For column chromatography, 200-300 mesh silica gel was used.  $^1\text{H}$  NMR were recorded on Bruker 300 MHz, 400 MHz or 500 MHz spectrometer and  $^{13}\text{C}$  NMR were recorded on Bruker 75 MHz, 100 MHz or 125MHz spectrometer in  $\text{CDCl}_3$ . HRMS were performed on Agilent 6540 Q-TOF mass spectrometer (ESI). Melting points were determined on a SGW X-4B melting point apparatus. Chiral HPLC were performed on Agilent 1260 using a Chiralpak ID column. Optical rotations were recorded on Rudolph Autopol IV polarimeter. 2-pyridones were commercial available. The gold catalysts<sup>[1]</sup> and  $\text{NaBARf}$ <sup>[2]</sup> were prepared according to the literature procedures.

## Preparation of substrates

All of the diazo compounds were prepared according to the literature procedures.<sup>[3]</sup>

The unreported diazo compounds were showing as below.

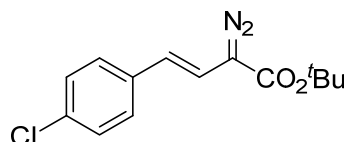

### *tert-butyl (E)-4-(4-chlorophenyl)-2-diazobut-3-enoate:*

A red solid (yield: 70 %), mp: 46-48 °C.

$^1\text{H}$  NMR (400 MHz,  $\text{CDCl}_3$ )  $\delta$  7.26 (s, 4H), 6.43 (d,  $J$  = 16.0 Hz, 1H), 6.12 (d,  $J$  = 16.0 Hz, 1H), 1.53 (s, 9H).  $^{13}\text{C}$  NMR (100 MHz,  $\text{CDCl}_3$ )  $\delta$  164.20, 135.57, 132.45, 128.84, 126.91, 121.21, 112.83, 82.48, 28.35.

HRMS (ESI) calcd. for  $\text{C}_{14}\text{H}_{16}\text{ClO}_2$   $[\text{M}+\text{H}-\text{N}_2]^+$ : 251.0834, found: 251.0838.

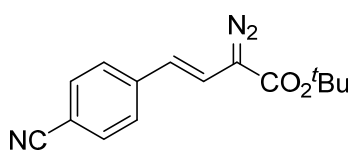

### *tert-butyl (E)-4-(4-cyanophenyl)-2-diazobut-3-enoate:*

A red solid (yield: 69 %), mp: 84-86 °C.

$^1\text{H}$  NMR (400 MHz,  $\text{CDCl}_3$ )  $\delta$  7.56 (d,  $J$  = 8.0 Hz, 2H), 7.39 (d,  $J$  = 8.0 Hz, 2H), 6.63 (d,  $J$  = 16.0 Hz, 1H), 6.17 (d,  $J$  = 16.0 Hz, 1H), 1.57 (s, 9H).  $^{13}\text{C}$  NMR (100 MHz,  $\text{CDCl}_3$ )  $\delta$  163.58, 141.51, 132.52, 126.03, 120.30, 119.08, 116.74, 109.75, 82.87, 28.32. HRMS (ESI) calcd. for  $\text{C}_{15}\text{H}_{16}\text{NO}_2$   $[\text{M}+\text{H}-\text{N}_2]^+$ : 242.1176, found: 242.1179.

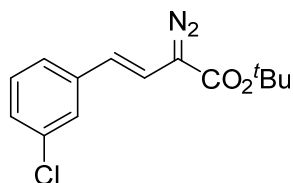

***tert-butyl (E)-4-(3-chlorophenyl)-2-diazobut-3-enoate:***

Red oil (yield: 75 %).

$^1\text{H}$  NMR (400 MHz,  $\text{CDCl}_3$ )  $\delta$  7.33-7.30 (m, 1H), 7.24-7.11 (m, 3H), 6.48 (d,  $J$  = 16.0 Hz, 1H), 6.10 (d,  $J$  = 16.0 Hz, 1H), 1.54 (s, 9H).  $^{13}\text{C}$  NMR (100 MHz,  $\text{CDCl}_3$ )  $\delta$  164.04, 138.91, 134.65, 129.87, 126.75, 125.67, 123.88, 120.94, 113.85, 82.53, 28.35. HRMS (ESI) calcd. for  $\text{C}_{14}\text{H}_{16}\text{ClO}_2$   $[\text{M}+\text{H}-\text{N}_2]^+$ : 251.0834, found: 251.0838.

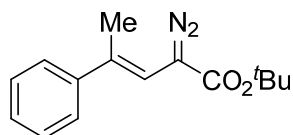

***tert-butyl (E)-2-diazo-4-phenylpent-3-enoate:***

Red oil (yield: 70 %).

$^1\text{H}$  NMR (300 MHz,  $\text{CDCl}_3$ )  $\delta$  7.43-7.26 (m, 5H), 5.96 (d,  $J$  = 3.0 Hz, 1H), 2.07 (d,  $J$  = 3.0 Hz, 3H), 1.52 (s, 9H).  $^{13}\text{C}$  NMR (75 MHz,  $\text{CDCl}_3$ )  $\delta$  165.84, 142.79, 133.68, 128.40, 127.19, 125.77, 109.65, 82.04, 28.35, 16.94. HRMS (ESI) calcd. for  $\text{C}_{15}\text{H}_{19}\text{O}_2$   $[\text{M}+\text{H}-\text{N}_2]^+$ : 231.1380, found: 231.1383.

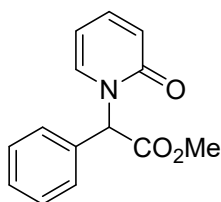

***methyl 2-(2-oxopyridin-1(2H)-yl)-2-phenylacetate (6):***

To a mixture of 2-pyridone (100 mg) and K<sub>2</sub>CO<sub>3</sub> (174 mg) in DMF (5 mL) was added methyl 2-bromo-2-phenylacetate (289 mg). The mixture was stirred at room temperature for 5 h. The solvent was removed under vacuum; the residue was purified by column chromatography (silica gel, eluted with EtOAc: Petroleum ether=1:20-1:10) to give **6** (230 mg, yield: 90 %) as a white solid; mp: 92-94 °C.

<sup>1</sup>H NMR (300 MHz, CDCl<sub>3</sub>): δ 7.51-7.40 (m, 3H), 7.39-7.29 (m, 3H), 7.05 (dd, *J* = 6.0, 3.0 Hz, 1H), 6.70 (s, 1H), 6.63-6.58 (m, 1H), 6.14-6.05 (m, 1H), 3.83 (s, 3H); <sup>13</sup>C NMR (75 MHz, CDCl<sub>3</sub>): δ 169.76, 162.60, 139.77, 135.47, 133.08, 129.53, 129.43, 120.14, 105.92, 61.48, 52.92. HRMS (ESI) calcd. for C<sub>14</sub>H<sub>14</sub>NO<sub>3</sub> [M+H]<sup>+</sup>: 244.0968, found: 244.0965.

**Initial investigation of Scheme 2**

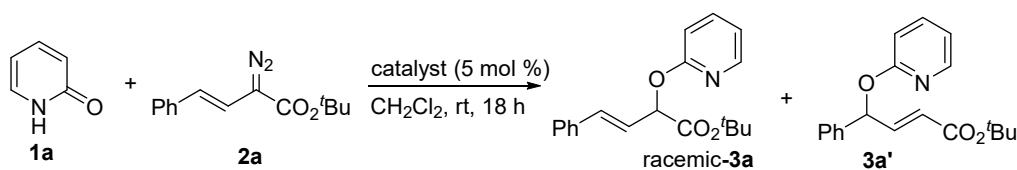

Xantphos(AuNTf<sub>2</sub>)<sub>2</sub>: 78% yield of racemic-**3a**  
Cu(OTf)<sub>2</sub>: 17% yield of racemic-**3a**  
Rh<sub>2</sub>(OAc)<sub>4</sub>: 9% yield of racemic-**3a**  
AgNTf<sub>2</sub>: 75% yield of **3a'**

**1. Using Xantphos(AuNTf<sub>2</sub>)<sub>2</sub> as catalyst:**

To a schlenk tube was added Xantphos(AuNTf<sub>2</sub>)<sub>2</sub> (38.4 mg, 0.025 mmol), **1a** (57 mg, 0.6 mmol) and dry CH<sub>2</sub>Cl<sub>2</sub> (2.5 mL) under argon atmosphere, then a solution of **2a** (122 mg, 0.5 mmol) in dry CH<sub>2</sub>Cl<sub>2</sub> (2.5 mL) was added via syringe pump over 30 min at RT. The resulting mixture was stirred at RT for 18 h. The mixture was concentrated under vacuum; the crude residue was purified by column chromatography (silica gel, eluted with EtOAc: Petroleum ether=1:30-1:20) to afford product racemic-**3a** (121 mg, yield: 78 %) as a white solid, mp: 103-105 °C. <sup>1</sup>H NMR (400 MHz, CDCl<sub>3</sub>) δ 8.13-8.09 (m, 1H), 7.62 (t, *J* = 8.0 Hz, 1H), 7.44 (d, *J* = 4.0 Hz, 2H), 7.38-7.27 (m, 3H), 6.92 (d, *J* = 12.0 Hz, 3H), 6.42 (dd, *J* = 16.0, 8.0 Hz, 1H), 5.77 (d, *J* = 8.0 Hz,

1H), 1.44 (s, 9H).  $^{13}\text{C}$  NMR (100 MHz,  $\text{CDCl}_3$ )  $\delta$  169.23, 162.25, 146.46, 138.86, 136.35, 133.87, 128.63, 128.16, 126.80, 122.87, 117.45, 111.19, 81.95, 74.84, 27.98. HRMS (ESI) calcd. for  $\text{C}_{19}\text{H}_{22}\text{NO}_3$   $[\text{M}+\text{H}]^+$ : 312.1594, found: 312.1596.

## 2. Using $\text{Cu}(\text{OTf})_2$ as catalyst:

To a schlenk tube was added  $\text{Cu}(\text{OTf})_2$  (9 mg, 0.025 mmol), **1a** (57 mg, 0.6 mmol) and dry  $\text{CH}_2\text{Cl}_2$  (2.5 mL) under argon atmosphere, then a solution of **2a** (122 mg, 0.5 mmol) in dry  $\text{CH}_2\text{Cl}_2$  (2.5 mL) was added via syringe pump over 30 min at RT. The resulting mixture was stirred at RT for 18 h. The mixture was concentrated under vacuum; the crude residue was purified by column chromatography (silica gel, eluted with EtOAc: Petroleum ether=1:30-1:20) to afford product racemic-**3a** (26 mg, yield: 17 %) as a white solid, mp: 103-105 °C.  $^1\text{H}$  NMR (400 MHz,  $\text{CDCl}_3$ )  $\delta$  8.13-8.09 (m, 1H), 7.62 (t,  $J$  = 8.0 Hz, 1H), 7.44 (d,  $J$  = 4.0 Hz, 2H), 7.38-7.27 (m, 3H), 6.92 (d,  $J$  = 12.0 Hz, 3H), 6.42 (dd,  $J$  = 16.0, 8.0 Hz, 1H), 5.77 (d,  $J$  = 8.0 Hz, 1H), 1.44 (s, 9H).  $^{13}\text{C}$  NMR (100 MHz,  $\text{CDCl}_3$ )  $\delta$  169.23, 162.25, 146.46, 138.86, 136.35, 133.87, 128.63, 128.16, 126.80, 122.87, 117.45, 111.19, 81.95, 74.84, 27.98. HRMS (ESI) calcd. for  $\text{C}_{19}\text{H}_{22}\text{NO}_3$   $[\text{M}+\text{H}]^+$ : 312.1594, found: 312.1596.

## 3. Using $\text{Rh}_2(\text{OAc})_4$ as catalyst:

To a schlenk tube was added  $\text{Rh}_2(\text{OAc})_4$  (11 mg, 0.025 mmol), **1a** (57 mg, 0.6 mmol) and dry  $\text{CH}_2\text{Cl}_2$  (2.5 mL) under argon atmosphere, then a solution of **2a** (122 mg, 0.5 mmol) in dry  $\text{CH}_2\text{Cl}_2$  (2.5 mL) was added via syringe pump over 30 min at RT. The resulting mixture was stirred at RT for 18 h. The mixture was concentrated under vacuum; the crude residue was purified by column chromatography (silica gel, eluted with EtOAc: Petroleum ether=1:30-1:20) to afford product racemic-**3a** (14 mg, yield: 9 %) as a white solid, mp: 103-105 °C.  $^1\text{H}$  NMR (400 MHz,  $\text{CDCl}_3$ )  $\delta$  8.13-8.09 (m, 1H), 7.62 (t,  $J$  = 8.0 Hz, 1H), 7.44 (d,  $J$  = 4.0 Hz, 2H), 7.38-7.27 (m, 3H), 6.92 (d,  $J$  = 12.0 Hz, 3H), 6.42 (dd,  $J$  = 16.0, 8.0 Hz, 1H), 5.77 (d,  $J$  = 8.0 Hz, 1H), 1.44 (s, 9H).  $^{13}\text{C}$  NMR (100 MHz,  $\text{CDCl}_3$ )  $\delta$  169.23, 162.25, 146.46, 138.86, 136.35, 133.87, 128.63, 128.16, 126.80, 122.87, 117.45, 111.19, 81.95, 74.84, 27.98. HRMS (ESI)

calcd. for  $C_{19}H_{22}NO_3$   $[M+H]^+$ : 312.1594, found: 312.1596.

#### 4. Using AgNTf<sub>2</sub> as catalyst:

To a schlenk tube was added AgNTf<sub>2</sub> (9.7 mg, 0.025 mmol), **1a** (57 mg, 0.6 mmol) and dry CH<sub>2</sub>Cl<sub>2</sub> (2.5 mL) under argon atmosphere, then a solution of **2a** (122 mg, 0.5 mmol) in dry CH<sub>2</sub>Cl<sub>2</sub> (2.5 mL) was added via syringe pump over 30 min at RT. The resulting mixture was stirred at RT for 18 h. The mixture was concentrated under vacuum; the crude residue was purified by column chromatography (silica gel, eluted with EtOAc: Petroleum ether=1:30-1:20) to afford product **3a'** (117 mg, yield: 75 %) as colorless oil. <sup>1</sup>H NMR (400 MHz, CDCl<sub>3</sub>) δ 8.13 – 8.08 (m, 1H), 7.61 – 7.53 (m, 1H), 7.45 (d, *J* = 7.3 Hz, 2H), 7.40 – 7.28 (m, 3H), 7.05 (dd, *J* = 15.6, 4.8 Hz, 1H), 6.88 – 6.80 (m, 3H), 6.02 (dd, *J* = 15.6, 1.5 Hz, 1H), 1.46 (s, 9H). <sup>13</sup>C NMR (75 MHz, CDCl<sub>3</sub>) δ 165.62, 162.33, 146.79, 145.24, 138.87, 138.74, 128.65, 128.17, 127.38, 122.86, 117.28, 111.53, 80.60, 74.67, 28.10. HRMS (ESI) calcd. for  $C_{19}H_{22}NO_3$   $[M+H]^+$ : 312.1594, found: 312.1598.

#### General procedure for table 2

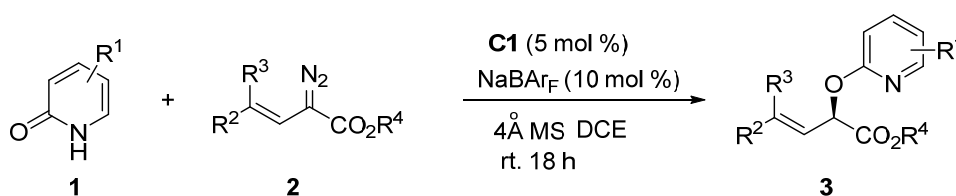

A 10 mL schlenk tube was charged with **C1** (41.92 mg, 0.025 mmol), NaBAr<sub>F</sub> (44.30 mg, 0.05 mmol), **1** (0.6 mmol) and 4Å MS (47 mg) under argon atmosphere, then dry DCE (2.5 mL) was added. The mixture was stirred at room temperature for 15 min; then a solution of **2** (0.5 mmol) in dry DCE (2.5 mL) was added via syringe pump over 40 min. The resulting mixture was for 18 h at room temperature. The mixture was concentrated under vacuum; the crude residue was purified by column chromatography (silica gel, eluted with EtOAc: Petroleum ether=1:60-1:10) to afford product **3**.

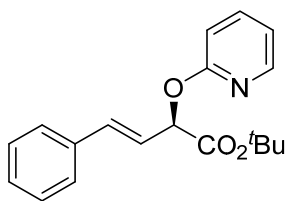

***tert-butyl (R,E)-4-phenyl-2-(pyridin-2-yloxy)but-3-enoate (3a):***

A white solid (124 mg, 80 %), mp: 103-105 °C. 94 % ee, determined by HPLC: Chiralpak ID Column, EtOH/hexane = 10/90, 1.0 mL/min, 254 nm;  $t_R$  = 4.59 min (major) and 4.21 min (minor).  $[\alpha]_D^{22} = +52.2$  (c = 0.1, CHCl<sub>3</sub>).

<sup>1</sup>H NMR (400 MHz, CDCl<sub>3</sub>)  $\delta$  8.13-8.09 (m, 1H), 7.62 (t,  $J$  = 8.0 Hz, 1H), 7.44 (d,  $J$  = 4.0 Hz, 2H), 7.38-7.27 (m, 3H), 6.92 (d,  $J$  = 12.0 Hz, 3H), 6.42 (dd,  $J$  = 16.0, 8.0 Hz, 1H), 5.77 (d,  $J$  = 8.0 Hz, 1H), 1.44 (s, 9H). <sup>13</sup>C NMR (100 MHz, CDCl<sub>3</sub>)  $\delta$  169.23, 162.25, 146.46, 138.86, 136.35, 133.87, 128.63, 128.16, 126.80, 122.87, 117.45, 111.19, 81.95, 74.84, 27.98. HRMS (ESI) calcd. for C<sub>19</sub>H<sub>22</sub>NO<sub>3</sub> [M+H]<sup>+</sup>: 312.1594, found: 312.1596.

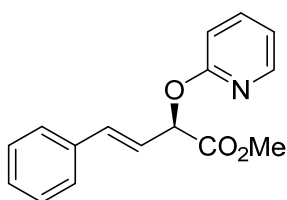

***methyl (R,E)-4-phenyl-2-(pyridin-2-yloxy)but-3-enoate (3b):***

Yellow oil (113 mg, 84 %). 48 % ee, determined by HPLC: Chiralpak ID Column, i-PrOH/hexane = 50/50, 1.0 mL/min, 254 nm;  $t_R$  = 7.10 min (major) and 4.97 min (minor).  $[\alpha]_D^{22} = +15.0$  (c = 0.1, CHCl<sub>3</sub>).

<sup>1</sup>H NMR (400 MHz, CDCl<sub>3</sub>)  $\delta$  8.13-8.10 (m, 1H), 7.66-7.60 (m, 1H), 7.44 (d,  $J$  = 8.0 Hz, 2H), 7.37-7.26 (m, 3H), 6.97-6.89 (m, 3H), 6.43 (dd,  $J$  = 16.0, 4.0 Hz, 1H), 5.93 (d,  $J$  = 8.0 Hz, 1H), 3.78 (s, 3H). <sup>13</sup>C NMR (100 MHz, CDCl<sub>3</sub>)  $\delta$  170.75, 162.09, 146.62, 138.99, 135.96, 134.45, 128.66, 128.35, 126.84, 122.29, 117.64, 111.24, 74.28, 52.50. HRMS (ESI) calcd. for C<sub>16</sub>H<sub>16</sub>NO<sub>3</sub> [M+H]<sup>+</sup>: 270.1125, found: 270.1128.

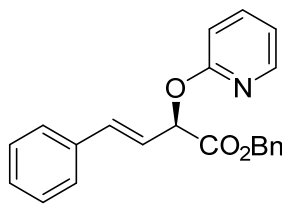

***benzyl (R,E)-4-phenyl-2-(pyridin-2-yloxy)but-3-enoate (3c):***

Colorless oil (134mg, 78%). 96 % ee, determined by HPLC: Chiralpak ID Column, i-PrOH/hexane = 50/50, 1.0 mL/min, 254 nm;  $t_R$  = 8.88 min (major) and 7.28 min (minor).  $[\alpha]_D^{22} = +35.1$  (c = 0.3, CHCl<sub>3</sub>).

<sup>1</sup>H NMR (400 MHz, CDCl<sub>3</sub>)  $\delta$  8.04 (s, 1H), 7.62 (t,  $J$  = 8.0 Hz, 1H), 7.42 (d,  $J$  = 8.0 Hz, 2H), 7.38-7.27 (m, 8H), 6.96-6.88 (m, 3H), 6.44 (dd,  $J$  = 16.0, 8.0 Hz, 1H), 5.93 (d,  $J$  = 8.0 Hz, 1H), 5.23 (q,  $J$  = 24.0 Hz, 2H). <sup>13</sup>C NMR (100 MHz, CDCl<sub>3</sub>)  $\delta$  170.17, 162.06, 146.56, 138.97, 135.97, 135.65, 134.61, 128.67, 128.50, 128.36, 128.21, 128.11, 126.86, 122.18, 117.65, 111.18, 74.53, 66.86. HRMS (ESI) calcd. for C<sub>22</sub>H<sub>20</sub>NO<sub>3</sub> [M+H]<sup>+</sup>: 346.1438, found: 346.1440.

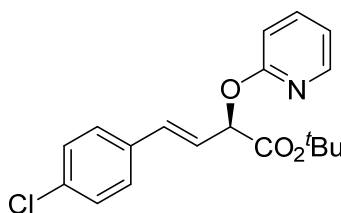

***tert-butyl (R,E)-4-(4-chlorophenyl)-2-(pyridin-2-yloxy)but-3-enoate (3d):***

A white solid (129 mg, 75 %), mp: 90-91 °C. 86 % ee, determined by HPLC: Chiralpak ID Column, i-PrOH/hexane = 50/50, 1.0 mL/min, 254 nm;  $t_R$  = 6.45 min (major) and 5.09 min (minor).  $[\alpha]_D^{22} = +35.9$  (c = 0.14, CHCl<sub>3</sub>).

<sup>1</sup>H NMR (400 MHz, CDCl<sub>3</sub>)  $\delta$  8.12-8.09 (m, 1H), 7.65-7.58 (m, 1H), 7.38-7.27 (m, 4H), 6.94-6.83 (m, 3H), 6.39 (dd,  $J$  = 16.0, 4.0 Hz, 1H), 5.78 (dd,  $J$  = 8.0, 4.0 Hz, 1H), 1.44 (s, 9H). <sup>13</sup>C NMR (100 MHz, CDCl<sub>3</sub>)  $\delta$  169.01, 162.22, 146.46, 138.87, 134.81, 133.81, 132.44, 128.80, 127.98, 123.64, 117.50, 111.15, 82.05, 74.60, 27.97. HRMS (ESI) calcd. for C<sub>19</sub>H<sub>21</sub>ClNO<sub>3</sub> [M+H]<sup>+</sup>: 346.1204, found: 346.1208.

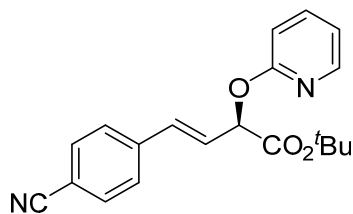

***tert-butyl (R,E)-4-(4-cyanophenyl)-2-(pyridin-2-yloxy)but-3-enoate (3e):***

A white solid (137 mg, 82 %), mp: 85-87 °C. 93 % ee, determined by HPLC: Chiralpak ID Column, i-PrOH/hexane = 50/50, 1.0 mL/min, 254 nm;  $t_R$  = 14.01 min (major) and 11.34 min (minor).  $[\alpha]_D^{22} = +39.5$  (c = 0.1, CHCl<sub>3</sub>).

<sup>1</sup>H NMR (400 MHz, CDCl<sub>3</sub>)  $\delta$  8.13-8.08 (m, 1H), 7.63 (d,  $J$  = 8.0 Hz, 3H), 7.51 (d,  $J$  = 8.0 Hz, 2H), 6.97-6.88 (m, 3H), 6.55 (dd,  $J$  = 16.0, 4.0 Hz, 1H), 5.85 (d,  $J$  = 4.0 Hz, 1H), 1.45 (s, 9H). <sup>13</sup>C NMR (100 MHz, CDCl<sub>3</sub>)  $\delta$  168.57, 162.05, 155.59, 146.47, 140.77, 138.98, 132.47, 131.46, 127.23, 127.04, 117.67, 111.36, 111.11, 82.38, 74.20, 27.96. HRMS (ESI) calcd. for C<sub>20</sub>H<sub>21</sub>N<sub>2</sub>O<sub>3</sub> [M+H]<sup>+</sup>: 337.1547, found: 337.1545.

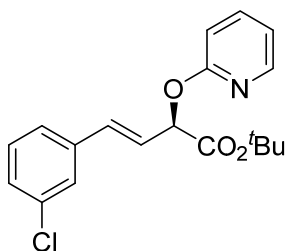

***tert-butyl (R,E)-4-(3-chlorophenyl)-2-(pyridin-2-yloxy)but-3-enoate (3f):***

A white solid (140 mg, 81%), mp: 87-89 °C. 92 % ee, determined by HPLC: Chiralpak ID Column, i-PrOH/hexane = 50/50, 1.0 mL/min, 254 nm;  $t_R$  = 7.39 min (major) and 6.24 min (minor).  $[\alpha]_D^{22} = -20.3$  (c = 0.1, CHCl<sub>3</sub>).

<sup>1</sup>H NMR (400 MHz, CDCl<sub>3</sub>)  $\delta$  8.12-8.09 (m, 1H), 7.65-7.59 (m, 1H), 7.42 (s, 1H), 7.32-7.25 (m, 3H), 6.94-6.83 (m, 3H), 6.44 (dd,  $J$  = 16.0, 4.0 Hz, 1H), 5.79 (d,  $J$  = 4.0 Hz, 1H), 1.45 (s, 9H). <sup>13</sup>C NMR (100 MHz, CDCl<sub>3</sub>)  $\delta$  168.91, 162.18, 146.46, 138.90, 138.17, 134.58, 132.17, 129.85, 128.05, 126.68, 124.99, 124.53, 117.54, 111.16, 82.13, 74.46, 27.97. HRMS (ESI) calcd. for C<sub>19</sub>H<sub>21</sub>ClNO<sub>3</sub> [M+H]<sup>+</sup>: 346.1204, found: 346.1208.

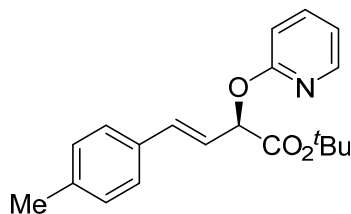

***tert-butyl (R,E)-2-(pyridin-2-yloxy)-4-(p-tolyl)but-3-enoate (3g):***

A white solid (91 mg, 56 %), mp: 83-85 °C. 87 % ee, determined by HPLC: Chiralpak ID Column, i-PrOH/hexane = 50/50, 1.0 mL/min, 254 nm;  $t_R$  = 7.33 min (major) and 7.03 min (minor).  $[\alpha]_D^{22} = +20.5$  ( $c = 0.1$ ,  $\text{CHCl}_3$ ).

$^1\text{H}$  NMR (400 MHz,  $\text{CDCl}_3$ )  $\delta$  8.13-8.08 (m, 1H), 7.65-7.57 (m, 1H), 7.34 (d,  $J = 8.0$  Hz, 2H), 7.15 (d,  $J = 8.0$  Hz, 2H), 6.93-6.84 (m, 3H), 6.38 (d,  $J = 8.0$  Hz, 1H), 5.75 (d,  $J = 8.0$  Hz, 1H), 2.35 (s, 3H), 1.44 (s, 9H).  $^{13}\text{C}$  NMR (125 MHz,  $\text{CDCl}_3$ )  $\delta$  169.55, 162.35, 146.44, 138.77, 133.89, 131.56, 129.29, 126.70, 121.83, 117.77, 117.36, 111.18, 81.70, 74.96, 28.02, 21.09. HRMS (ESI) calcd. for  $\text{C}_{20}\text{H}_{24}\text{NO}_3$   $[\text{M}+\text{H}]^+$ : 326.1751, found: 326.1752.

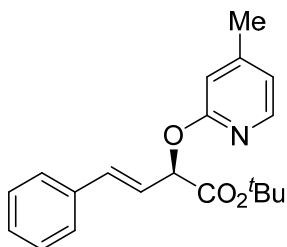

***tert-butyl (R,E)-2-((4-methylpyridin-2-yl)oxy)-4-phenylbut-3-enoate (3h):***

A white solid (122 mg, 75 %), mp: 79-81 °C. 93 % ee, determined by HPLC: Chiralpak ID Column, i-PrOH/hexane = 30/70, 1.0 mL/min, 254 nm;  $t_R$  = 11.29 min (major) and 4.73 min (minor).  $[\alpha]_D^{22} = +32.5$  ( $c = 0.1$ ,  $\text{CHCl}_3$ ).

$^1\text{H}$  NMR (400 MHz,  $\text{CDCl}_3$ )  $\delta$  7.96 (d,  $J = 5.2$  Hz, 1H), 7.46-7.42 (m, 2H), 7.37-7.25 (m, 3H), 6.91 (dd,  $J = 16.0, 0.8$  Hz, 1H), 6.75-6.71 (m, 2H), 6.41 (dd,  $J = 16.0, 6.5$  Hz, 1H), 5.78 (dd,  $J = 6.5, 1.4$  Hz, 1H), 2.31 (s, 3H), 1.45 (s, 9H).  $^{13}\text{C}$  NMR (100 MHz,  $\text{CDCl}_3$ )  $\delta$  169.31, 162.62, 150.21, 145.97, 136.36, 133.72, 128.60, 128.09, 126.78, 123.08, 119.01, 111.24, 81.86, 74.73, 27.98, 20.96. HRMS (ESI) calcd. for  $\text{C}_{20}\text{H}_{24}\text{NO}_3$   $[\text{M}+\text{H}]^+$ : 326.1751, found: 326.1755.

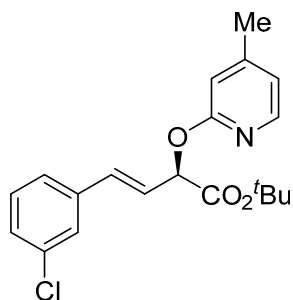

***tert-butyl (R,E)-4-(3-chlorophenyl)-2-((4-methylpyridin-2-yl)oxy)but-3-enoate (3i):***

A white solid (144 mg, 80 %), mp: 89-91 °C. 91 % ee, determined by HPLC: Chiralpak ID Column, i-PrOH/hexane = 50/50, 1.0 mL/min, 254 nm;  $t_R$  = 6.78 min (major) and 4.91 min (minor).  $[\alpha]_D^{22} = +34.9$  (c = 0.1, CHCl<sub>3</sub>).

<sup>1</sup>H NMR (400 MHz, CDCl<sub>3</sub>)  $\delta$  7.97-7.93 (m, 1H), 7.41 (s, 1H), 7.31–7.21 (m, 3H), 6.84 (dd,  $J$  = 12.0, 4.0 Hz, 1H), 6.75–6.71 (m, 2H), 6.42 (dd,  $J$  = 16.0, 8.0 Hz, 1H), 5.79 (dd,  $J$  = 8.0, 4.0 Hz, 1H), 2.31 (s, 3H), 1.45 (s, 9H). <sup>13</sup>C NMR (100 MHz, CDCl<sub>3</sub>)  $\delta$  168.99, 162.50, 150.29, 145.97, 138.23, 134.58, 132.03, 129.83, 128.00, 126.67, 124.97, 124.70, 119.10, 111.20, 82.05, 74.35, 27.98, 20.96. HRMS (ESI) calcd. for C<sub>20</sub>H<sub>23</sub>ClNO<sub>3</sub> [M+H]<sup>+</sup>: 360.1361, found: 360.1364.

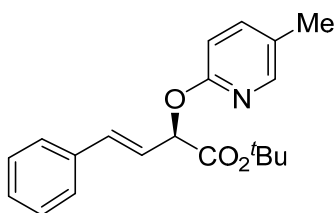

***tert-butyl (R,E)-2-((5-methylpyridin-2-yl)oxy)-4-phenylbut-3-enoate (3j):***

A white solid (123 mg, 76 %), mp: 83-85 °C. 89 % ee, determined by HPLC: Chiralpak ID Column, i-PrOH/hexane = 50/50, 1.0 mL/min, 254 nm;  $t_R$  = 8.43 min (major) and 7.97 min (minor).  $[\alpha]_D^{22} = +36.8$  (c = 0.1, CHCl<sub>3</sub>).

<sup>1</sup>H NMR (400 MHz, CDCl<sub>3</sub>)  $\delta$  7.90 (s, 1H), 7.43 (d,  $J$  = 7.7 Hz, 3H), 7.36-7.24 (m, 3H), 6.87 (dd,  $J$  = 30.9, 12.2 Hz, 2H), 6.41 (dd,  $J$  = 16.0, 6.5 Hz, 1H), 5.73 (d,  $J$  = 6.5 Hz, 1H), 2.24 (s, 3H), 1.45 (s, 9H). <sup>13</sup>C NMR (125 MHz, CDCl<sub>3</sub>)  $\delta$  169.34, 160.56, 145.84, 139.87, 136.34, 133.72, 128.58, 128.07, 126.76, 123.10, 110.49, 100.64,

81.82, 74.74, 27.98, 17.44. HRMS (ESI) calcd. for  $C_{20}H_{24}NO_3$   $[M+H]^+$ : 326.1751, found: 326.1752.

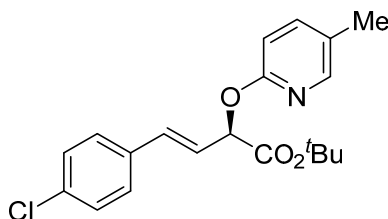

***tert-butyl(R,E)-4-(4-chlorophenyl)-2-((5-methylpyridin-2-yl)oxy)but-3-enoate (3k):***

A white solid (131 mg, 73 %), mp: 87-89 °C. 90 % ee, determined by HPLC: Chiralpak ID Column, i-PrOH/hexane = 50/50, 1.0 mL/min, 254 nm;  $t_R$  = 6.76 min(major) and 6.03 min (minor).  $[\alpha]_D^{22} = +31.5$  (c = 0.1,  $CHCl_3$ ).

$^1H$  NMR (400 MHz,  $CDCl_3$ )  $\delta$  7.89 (s, 1H), 7.43 (dd,  $J$  = 8.4, 2.3 Hz, 1H), 7.35 (d,  $J$  = 8.5 Hz, 2H), 7.30 (d,  $J$  = 8.5 Hz, 2H), 6.89-6.79 (m, 2H), 6.39 (dd,  $J$  = 16.0, 6.3 Hz, 1H), 5.74 (dd,  $J$  = 6.3, 1.4 Hz, 1H), 2.24 (s, 3H), 1.44 (s, 9H).  $^{13}C$  NMR (100 MHz,  $CDCl_3$ )  $\delta$  169.16, 160.47, 145.85, 139.93, 134.86, 133.76, 132.31, 128.78, 127.97, 126.47, 123.81, 110.46, 81.97, 74.52, 27.99, 17.45. HRMS (ESI) calcd. for  $C_{20}H_{23}ClNO_3$   $[M+H]^+$ : 360.1361, found: 360.1358.

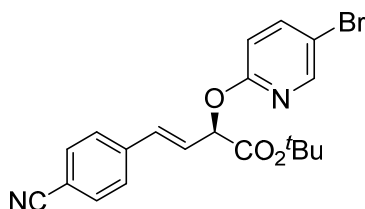

***tert-butyl (R,E)-2-((5-bromopyridin-2-yl)oxy)-4-(4-cyanophenyl)but-3-enoate (3l):***

A white solid (169 mg, 82 %), mp: 133-135 °C. 96 % ee, determined by HPLC: Chiralpak ID Column, i-PrOH/hexane = 50/50, 1.0 mL/min, 254 nm;  $t_R$  = 6.88 min (major) and 5.84 min (minor).  $[\alpha]_D^{22} = +46.7$  (c = 0.1,  $CHCl_3$ ).

$^1H$  NMR (400 MHz,  $CDCl_3$ )  $\delta$  8.15 (d,  $J$  = 4.0 Hz, 1H), 7.75-7.58 (m, 3H), 7.51 (d,  $J$  = 8.0 Hz, 2H), 6.96-6.82 (m, 2H), 6.52 (dd,  $J$  = 24.0, 8.0 Hz, 1H), 5.79-5.75 (m, 1H), 1.45 (s, 9H).  $^{13}C$  NMR (100 MHz,  $CDCl_3$ )  $\delta$  168.14, 160.87, 147.09, 141.63, 140.54, 132.49, 131.74, 127.24, 126.42, 118.80, 112.79, 112.73, 111.45, 82.66, 74.56, 27.96. HRMS (ESI) calcd. for  $C_{20}H_{20}BrN_2O_3$   $[M+H]^+$ : 415.0652, found: 415.0653.

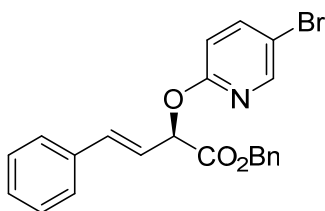

**benzyl (*R,E*)-2-((5-bromopyridin-2-yl)oxy)-4-phenylbut-3-enoate (3m):**

Colorless oil (148mg, 70%). 81 % ee, determined by HPLC: Chiralpak ID Column, i-PrOH/hexane = 50/50, 1.0 mL/min, 254 nm;  $t_R$  = 11.50 min (major) and 6.29 min (minor).  $[\alpha]_D^{22} = +28.8$  ( $c = 0.1$ ,  $\text{CHCl}_3$ ).

$^1\text{H}$  NMR (400 MHz,  $\text{CDCl}_3$ )  $\delta$  8.02 (d,  $J = 2.3$  Hz, 1H), 7.69 (dd,  $J = 8.7, 2.4$  Hz, 1H), 7.40 (d,  $J = 7.2$  Hz, 2H), 7.37-7.24 (m, 8H), 6.90 (d,  $J = 16.0$  Hz, 1H), 6.83 (d,  $J = 8.7$  Hz, 1H), 6.39 (dd,  $J = 16.0, 6.8$  Hz, 1H), 5.85 (d,  $J = 6.2$  Hz, 1H), 5.27 – 5.13 (m, 2H).

$^{13}\text{C}$  NMR (100 MHz,  $\text{CDCl}_3$ )  $\delta$  169.66, 160.93, 147.18, 141.53, 135.84, 135.47, 134.92, 128.67, 128.52, 128.45, 128.31, 128.21, 126.84, 121.73, 112.76, 112.73, 74.95, 66.98. HRMS (ESI) calcd. for  $\text{C}_{22}\text{H}_{19}\text{BrNO}_3$   $[\text{M}+\text{H}]^+$ : 424.0543, found: 424.0538.

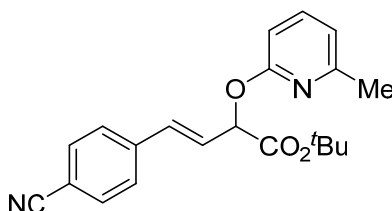

**tert-butyl (*E*)-4-(4-cyanophenyl)-2-((6-methylpyridin-2-yl)oxy)but-3-enoate (3n):**

A white solid (134 mg, 77 %), mp: 112-114 °C. 73 % ee, determined by HPLC: Chiralpak ID Column, i-PrOH/hexane = 50/50, 1.0 mL/min, 254 nm;  $t_R$  = 19.94 min (major) and 13.01 min (minor).  $[\alpha]_D^{22} = +8.8$  ( $c = 0.15$ ,  $\text{CHCl}_3$ ).

$^1\text{H}$  NMR (400 MHz,  $\text{CDCl}_3$ )  $\delta$  7.63 (d,  $J = 12.0$  Hz, 2H), 7.54-7.48 (m, 3H), 6.94 (d,  $J = 16.0$  Hz, 1H), 6.73 (dd,  $J = 20.0, 8.0$  Hz, 2H), 6.55 (dd,  $J = 16.0, 8.0$  Hz, 1H), 5.80 (d,  $J = 4.0$  Hz, 1H), 2.40 (s, 3H), 1.45 (s, 9H).  $^{13}\text{C}$  NMR (100 MHz,  $\text{CDCl}_3$ )  $\delta$  168.71, 161.40, 155.80, 140.85, 139.18, 132.46, 131.42, 127.22, 127.19, 118.86, 116.63,

111.31, 107.53, 82.11, 74.15, 28.00, 23.93. HRMS (ESI) calcd. for  $C_{21}H_{23}N_2O_3$   $[M+H]^+$ : 351.1703, found: 351.1704.

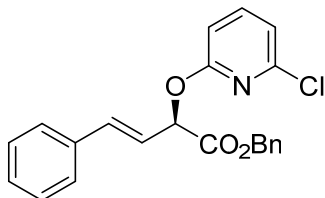

***benzyl (R,E)-2-((6-chloropyridin-2-yl)oxy)-4-phenylbut-3-enoate (3o):***

Colorless oil (134 mg, 71 %). 64 % ee, determined by HPLC: Chiralpak ID Column, i-PrOH/hexane = 50/50, 1.0 mL/min, 254 nm;  $t_R$  = 14.27 min (major) and 6.67 min (minor).  $[\alpha]_D^{22} = +16.5$  (c = 0.15,  $CHCl_3$ ).

$^1H$  NMR (400 MHz,  $CDCl_3$ )  $\delta$  7.57 (t,  $J$  = 8.0 Hz, 1H), 7.43 -7.28 (m, 10H), 6.96-6.88 (m, 2H), 6.84 (d,  $J$  = 8.0 Hz, 1H), 6.39 (dd,  $J$  = 16.0, 8.0 Hz, 1H), 5.93 (d,  $J$  = 8.0 Hz, 1H), 5.30 (d,  $J$  = 12.4 Hz, 1H), 5.18 (d,  $J$  = 12.0 Hz, 1H).  $^{13}C$  NMR (75 MHz,  $CDCl_3$ )  $\delta$  169.58, 161.68, 148.03, 141.10, 135.77, 135.43, 135.15, 128.67, 128.57, 128.48, 128.28, 128.10, 126.86, 121.48, 117.40, 109.34, 74.95, 67.12. HRMS (ESI) calcd. for  $C_{22}H_{19}ClNO_3$   $[M+H]^+$ : 380.1048, found: 380.1049.

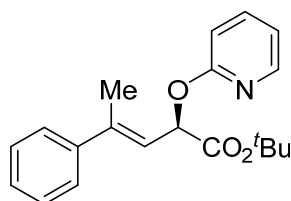

***tert-butyl (R,E)-4-phenyl-2-(pyridin-2-yloxy)pent-3-enoate (3p):***

a white solid (83 mg, 51 %), mp: 90-92 °C. 43 % ee, determined by HPLC: Chiralpak ID Column, i-PrOH/hexane = 50/50, 1.0 mL/min, 254 nm;  $t_R$  = 8.80 min (major) and 6.44 min (minor).  $[\alpha]_D^{22} = +17.3$  (c = 0.1,  $CHCl_3$ ).

$^1H$  NMR (300 MHz,  $CDCl_3$ )  $\delta$  8.14-8.10 (m, 1H), 7.64-7.56 (m, 1H), 7.49-7.42 (m, 2H), 7.38-7.28 (m, 3H), 6.92-6.85 (m, 2H), 6.02-5.92 (m, 2H), 2.28 (d,  $J$  = 0.7 Hz, 3H), 1.43 (s, 9H).  $^{13}C$  NMR (125 MHz,  $CDCl_3$ )  $\delta$  169.60, 162.52, 146.44, 142.54, 141.69, 138.72, 128.31, 127.68, 126.04, 121.51, 117.27, 111.18, 81.62, 72.47, 27.98, 17.16. HRMS (ESI) calcd. for  $C_{20}H_{24}NO_3$   $[M+H]^+$ : 326.1751, found: 326.1752.

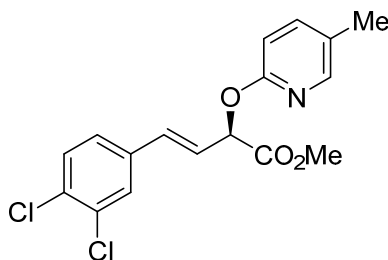

***methyl (R,E)-4-(3,4-dichlorophenyl)-2-((5-methylpyridin-2-yl)oxy)but-3-enoate***

**(3q):**

A yellow solid (144 mg, 82 %), mp: 105-107 °C. 90 % ee, determined by HPLC: Chiralpak ID Column, i-PrOH/hexane = 50/50, 1.0 mL/min, 254 nm;  $t_R$  = 11.93 min (major) and 11.23 min (minor).  $[\alpha]_D^{22} = +42.3$  (c = 0.1, CHCl<sub>3</sub>).

<sup>1</sup>H NMR (400 MHz, CDCl<sub>3</sub>) δ 7.92-7.88 (m, 1H), 7.51-7.36 (m, 3H), 7.24 (dd,  $J$  = 12.0, 4.0 Hz, 1H), 6.86-6.78 (m, 2H), 6.42 (dd,  $J$  = 20.0, 8.0 Hz, 1H), 5.92 (dd,  $J$  = 8.0, 4.0 Hz, 1H), 3.77 (s, 3H), 2.24 (s, 3H). <sup>13</sup>C NMR (100 MHz, CDCl<sub>3</sub>) δ 170.45, 160.13, 146.01, 140.12, 136.12, 132.77, 131.92, 131.42, 130.54, 128.49, 126.82, 125.93, 124.59, 110.47, 73.65, 52.57, 17.45. HRMS (ESI) calcd. for C<sub>17</sub>H<sub>16</sub>Cl<sub>2</sub>NO<sub>3</sub> [M+H]<sup>+</sup>: 352.0502, found: 352.0505.

## Control experiments for Scheme 3

### 1. General procedure for Scheme 3-a

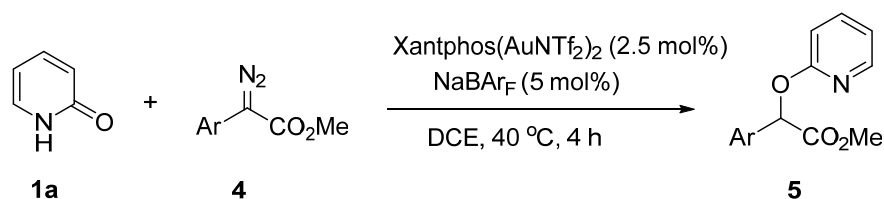

A 10 mL schlenk tube was charged with Xantphos(AuNTf<sub>2</sub>)<sub>2</sub> (19.2 mg, 0.0125 mmol), NaBAr<sub>F</sub> (22.1 mg, 0.025 mmol) and **1a** (0.6 mmol) under argon atmosphere, then dry DCE (2.5 mL) was added. The mixture was stirred at room temperature for 15 min; then a solution of **4** (0.5 mmol) in dry DCE (2.5 mL) was added via syringe pump over 40 min. After addition, the mixture was stirred for 4 h at 40 °C. The mixture was concentrated under vacuum; the crude residue was purified by column

chromatography (silica gel, eluted with EtOAc: Petroleum ether=1:30-1:10) to afford product **5**.

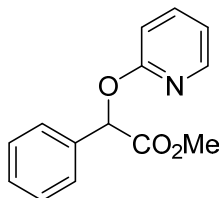

***methyl 2-phenyl-2-(pyridin-2-yloxy)acetate (5a):***

Colorless oil (111 mg, 91 %).

$^1\text{H}$  NMR (400 MHz,  $\text{CDCl}_3$ )  $\delta$  8.14-8.10 (m, 1H), 7.64-7.57 (m, 3H), 7.44-7.34 (m, 3H), 6.92 (d,  $J = 12.0$  Hz, 1H), 6.91-6.87 (m, 1H), 6.23 (s, 1H), 3.71 (s, 3H).  $^{13}\text{C}$  NMR (100 MHz,  $\text{CDCl}_3$ )  $\delta$  170.89, 162.35, 146.62, 138.94, 135.15, 128.97, 128.74, 127.70, 117.63, 111.34, 75.58, 52.41. HRMS (ESI) calcd. for  $\text{C}_{14}\text{H}_{14}\text{NO}_3$   $[\text{M}+\text{H}]^+$ : 244.0968, found: 244.0965.

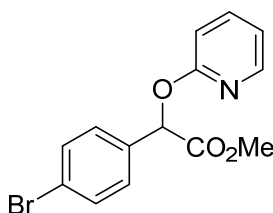

***methyl 2-(4-bromophenyl)-2-(pyridin-2-yloxy)acetate (5b):***

Colorless oil (138 mg, 86 %).

$^1\text{H}$  NMR (400 MHz,  $\text{CDCl}_3$ )  $\delta$  8.12 (d,  $J = 4.0$  Hz, 1H), 7.63 (t,  $J=8.0$  Hz, 1H), 7.52 (q,  $J=16.0$  Hz, 4H), 6.95-6.90(m, 2H), 6.20 (s, 1H), 3.72 (s, 3H).  $^{13}\text{C}$  NMR (100 MHz,  $\text{CDCl}_3$ )  $\delta$  170.46, 162.07, 146.62, 139.04, 134.20, 131.88, 129.28, 123.10, 117.80, 111.29, 74.83, 52.57. HRMS (ESI) calcd. for  $\text{C}_{14}\text{H}_{13}\text{BrNO}_3$   $[\text{M}+\text{H}]^+$ : 322.0073, found: 322.0077.

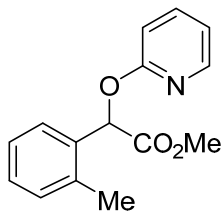

***methyl 2-(pyridin-2-yloxy)-2-(o-tolyl)acetate (5c):***

Colorless oil (114 mg, 89 %).

$^1\text{H}$  NMR (400 MHz,  $\text{CDCl}_3$ )  $\delta$  8.11 (d,  $J = 4.0$  Hz, 1H), 7.61-7.53 (m, 2H), 7.28-7.17 (m, 3H), 6.88 (d,  $J = 8.0$  Hz, 2H), 6.51 (s, 1H), 3.70 (s, 3H), 2.50 (s, 3H).  $^{13}\text{C}$  NMR (100 MHz,  $\text{CDCl}_3$ )  $\delta$  171.11, 162.47, 146.64, 138.93, 137.04, 133.74, 130.75, 128.95, 127.99, 126.39, 117.58, 111.34, 72.43, 52.34, 19.57. HRMS (ESI) calcd. for  $\text{C}_{15}\text{H}_{16}\text{NO}_3$   $[\text{M}+\text{H}]^+$ : 258.1125, found: 258.1127.

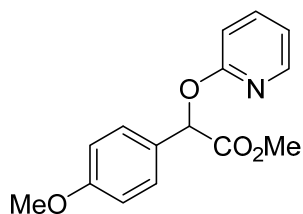

***methyl 2-(4-methoxyphenyl)-2-(pyridin-2-yloxy)acetate (5d):***

Colorless oil (121 mg, 89 %).

$^1\text{H}$  NMR (400 MHz,  $\text{CDCl}_3$ )  $\delta$  8.12 (d,  $J = 4.0$  Hz, 1H), 7.61 (t,  $J = 8.0$  Hz, 1H), 7.52 (d,  $J = 12.0$  Hz, 2H), 6.96-6.88 (m, 4H), 6.16 (s, 1H), 3.82 (s, 3H), 3.72 (s, 3H).  $^{13}\text{C}$  NMR (100 MHz,  $\text{CDCl}_3$ )  $\delta$  171.11, 162.41, 160.15, 146.61, 138.90, 129.16, 127.22, 117.55, 114.17, 111.33, 75.20, 55.35, 52.38. HRMS (ESI) calcd. for  $\text{C}_{15}\text{H}_{16}\text{NO}_4$   $[\text{M}+\text{H}]^+$ : 274.1074, found: 274.1078.

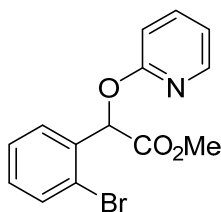

***methyl 2-(2-bromophenyl)-2-(pyridin-2-yloxy)acetate (5e):***

Colorless oil (139 mg, 87 %).

$^1\text{H}$  NMR (400 MHz,  $\text{CDCl}_3$ )  $\delta$  8.14 (d,  $J$  = 4.0 Hz, 1H), 7.67-7.58 (m, 3H), 7.39-7.33 (m, 1H), 7.27-7.20 (m, 1H), 6.95-6.86 (m, 2H), 6.77 (s, 1H), 3.75 (s, 3H).  $^{13}\text{C}$  NMR (100 MHz,  $\text{CDCl}_3$ )  $\delta$  170.43, 162.18, 146.71, 138.96, 135.05, 133.19, 130.49, 129.66, 127.85, 124.39, 117.75, 111.16, 74.35, 52.55. HRMS (ESI) calcd. for  $\text{C}_{14}\text{H}_{13}\text{BrNO}_3$   $[\text{M}+\text{H}]^+$ : 322.0073, found: 322.0069.

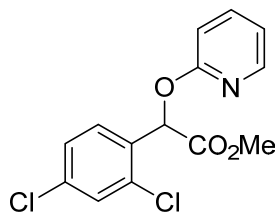

***methyl 2-(2,4-dichlorophenyl)-2-(pyridin-2-yloxy)acetate (5f):***

A white solid (140 mg, 91 %), mp: 87-89 °C.

$^1\text{H}$  NMR (400 MHz,  $\text{CDCl}_3$ )  $\delta$  8.13 (d,  $J$  = 8.0 Hz, 1H), 7.62 (t,  $J$  = 12.0 Hz, 2H), 7.46 (s, 1H), 7.33-7.24 (m, 1H), 6.96-6.86 (m, 2H), 6.75 (s, 1H), 3.75 (s, 3H).  $^{13}\text{C}$  NMR (100 MHz,  $\text{CDCl}_3$ )  $\delta$  170.04, 161.96, 146.68, 139.05, 135.49, 134.85, 132.08, 130.40, 129.66, 127.60, 117.89, 111.15, 71.36, 52.66. HRMS (ESI) calcd. for  $\text{C}_{14}\text{H}_{12}\text{Cl}_2\text{NO}_3$   $[\text{M}+\text{H}]^+$ : 312.0189, found: 312.0186.

**2. Control experiments for Scheme 3-b**

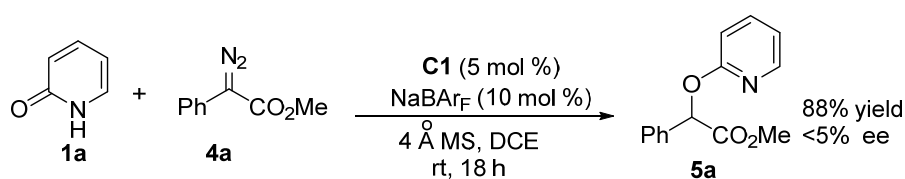

A 10 mL schlenk tube was charged with **C1** (41.92 mg, 0.025 mmol),  $\text{NaBARF}$  (44.30 mg, 0.05 mmol), **1a** (57 mg, 0.6 mmol) and 4 Å MS (47 mg) under argon atmosphere, then dry DCE (2.5 mL) was added. The mixture was stirred at room temperature for 15 min; then a solution of **4a** (88 mg, 0.5 mmol) in dry DCE (2.5 mL) was added via syringe pump over 40 min. The resulting mixture was for 18 h at room temperature. The mixture was concentrated under vacuum; the crude residue was purified by column chromatography (silica gel, eluted with EtOAc: Petroleum ether=1:60-1:10) to afford product **5a** (107 mg, yield: 88 %) as colorless oil.  $^1\text{H}$  NMR (400 MHz,

CDCl<sub>3</sub>)  $\delta$  8.14-8.10 (m, 1H), 7.64-7.57 (m, 3H), 7.44-7.34 (m, 3H), 6.92 (d,  $J$  = 12.0 Hz, 1H), 6.91-6.87 (m, 1H), 6.23 (s, 1H), 3.71 (s, 3H). <sup>13</sup>C NMR (100 MHz, CDCl<sub>3</sub>)  $\delta$  170.89, 162.35, 146.62, 138.94, 135.15, 128.97, 128.74, 127.70, 117.63, 111.34, 75.58, 52.41. HRMS (ESI) calcd. for C<sub>14</sub>H<sub>14</sub>NO<sub>3</sub> [M+H]<sup>+</sup>: 244.0968, found: 244.0965.

### 3. Control experiments for Scheme 3-c

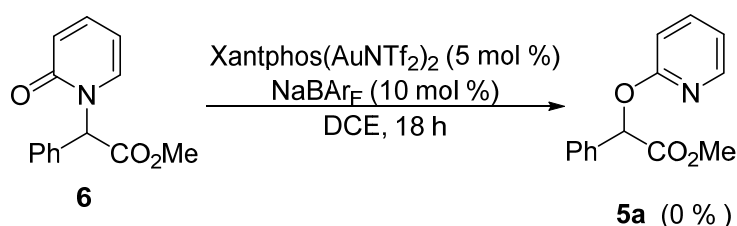

A 10 mL schlenk tube was charged with Xantphos(AuNTf<sub>2</sub>)<sub>2</sub> (15.3 mg, 0.01 mmol), NaBARF (18.2 mg, 0.02 mmol), **6** (50 mg, 0.2 mmol) under argon atmosphere, then dry DCE (2.5 mL) was added. The mixture was stirred under argon atmosphere for 18h. The reaction was concentrated and purified by column chromatography (silica gel, eluted with EtOAc: Petroleum ether= 1:20-1:10) to recover compound **6** (48 mg).

### 4. Control experiments for Scheme 3-d

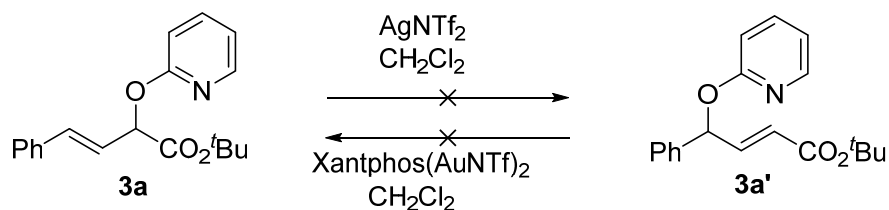

To a schlenk tube was added AgNTf<sub>2</sub> (1.9 mg, 0.005 mmol), **3a** (31 mg, 0.1 mmol) and dry CH<sub>2</sub>Cl<sub>2</sub> (2.5 mL) under argon atmosphere. The resulting mixture was stirred at RT for 18 h. The mixture was concentrated under vacuum and purified by column chromatography (silica gel, eluted with EtOAc: Petroleum ether=1:20) to recovered **3a** (30 mg).

To a schlenk tube was added Xantphos(AuNTf<sub>2</sub>)<sub>2</sub> (7.6 mg, 0.005 mmol), **3a'** (31 mg, 0.1 mmol) and dry CH<sub>2</sub>Cl<sub>2</sub> (2 mL) under argon atmosphere; the resulting solution was

stirred at RT for 18 h. The mixture was concentrated under vacuum and purified by column chromatography (silica gel, eluted with EtOAc: Petroleum ether=1:15) to recovered **3a'** (30.5 mg).

### X-ray structure of **3q** and **5f**

The crystal structures have been deposited at the Cambridge Crystallographic Data Centre (CCDC 1445774, **3q**) and (CCDC 1445775, **5f**). The data can be obtained free of charge via the internet at [www.ccdc.cam.ac.uk/data\\_request/cif](http://www.ccdc.cam.ac.uk/data_request/cif).

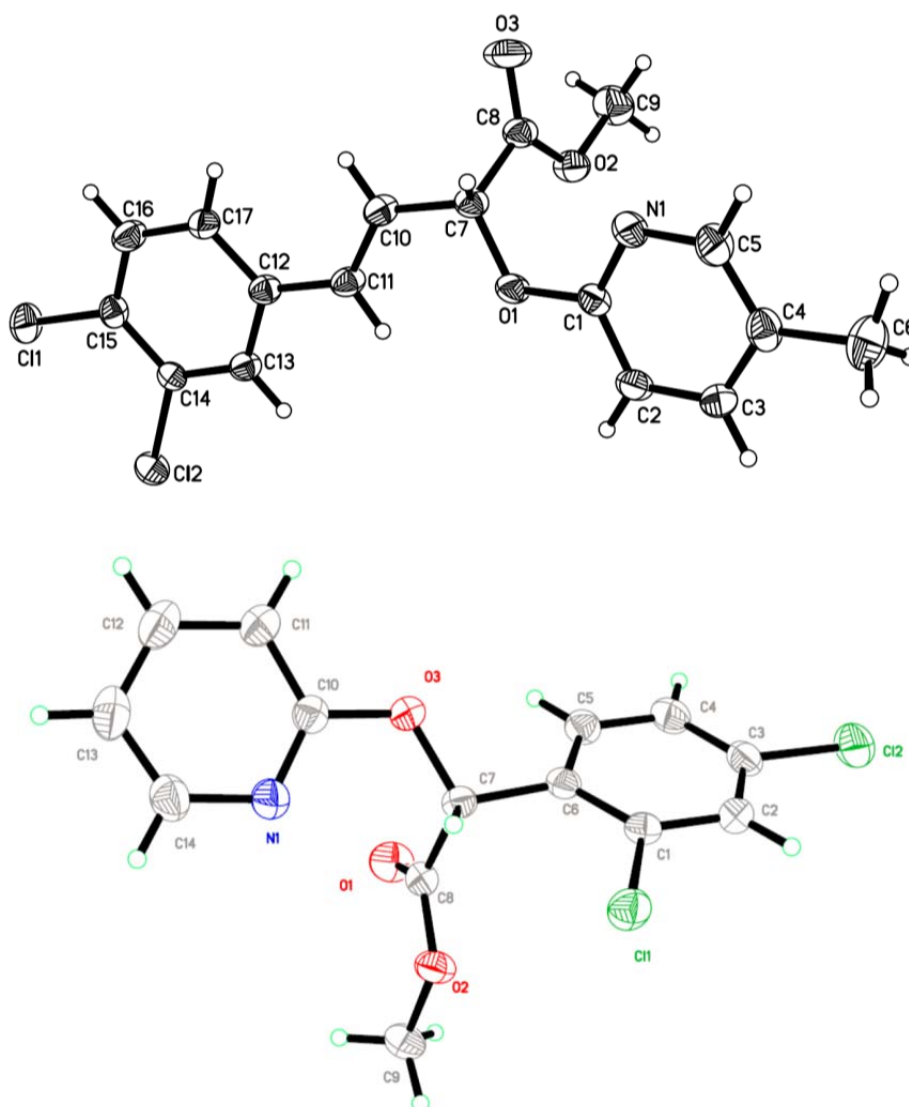

### References:

- [1] (a) Huang, L.; Yang, H.-B.; Zhang, D.-H.; Zhang, Zh.; Tang, X.-Y.; Xu, Q.; Shi, M.

*Angew. Chem. Int. Ed.* **2013**, *52*, 6767. (b) Handa, S.; Lippincott, D. J.; Aue, D. H.; Lipshutz, B. H. *Angew. Chem. Int. Ed.* **2014**, *53*, 10658. (c) LaLonde, R. L.; Wang, Z. J.; Mba, M.; Lackner, A. D.; Toste, F. D. *Angew. Chem. Int. Ed.* **2010**, *49*, 598. (d) Deák, A.; Megyes, T.; Tárkányi, G.; Király, P.; Biczók, L.; Pálincás, G.; Stang, P. J. *J. Am. Chem. Soc.* **2006**, *128*, 12668.

[2] (a) Smith, C. R.; Zhang, A.; Mans, D. J.; RajanBabu, T. V. *Org. Synth.* **2008**, *85*, 248. (b) Reger, D. L.; Little, C. A.; Brown, K. J.; Lamba, J. J. S.; Krumper, J. R.; Bergman, R. G.; Irwin, M.; Fackler, J. P. *Inorg. Synth.* **2004**, *34*, 5.

[3] (a) Manning, J. R.; Davies, H. M. L. *J. Am. Chem. Soc.* **2008**, *130*, 8602. (b) Manning, J. R.; Davies, H. M. L. *Org. Synth.* **2007**, *84*, 334. (c) Davies, H. M. L.; Yang, J.; Manning, J. R. *Tetrahedron: Asymmetry* **2006**, *17*, 665. (d) Davies, H. M. L.; Smith, H. D.; Hu, B.; Klenzak, S. M.; Hegner, F. J. *J. Org. Chem.* **1992**, *57*, 6900. (e) Wang, H.; Guptill, D. M.; Varela-Alvarez, A.; Musaev, D. G.; Davies, H. M. L. *Chem. Sci.* **2013**, *4*, 2844.

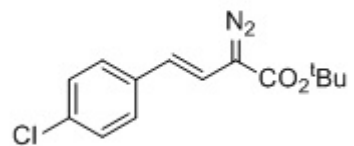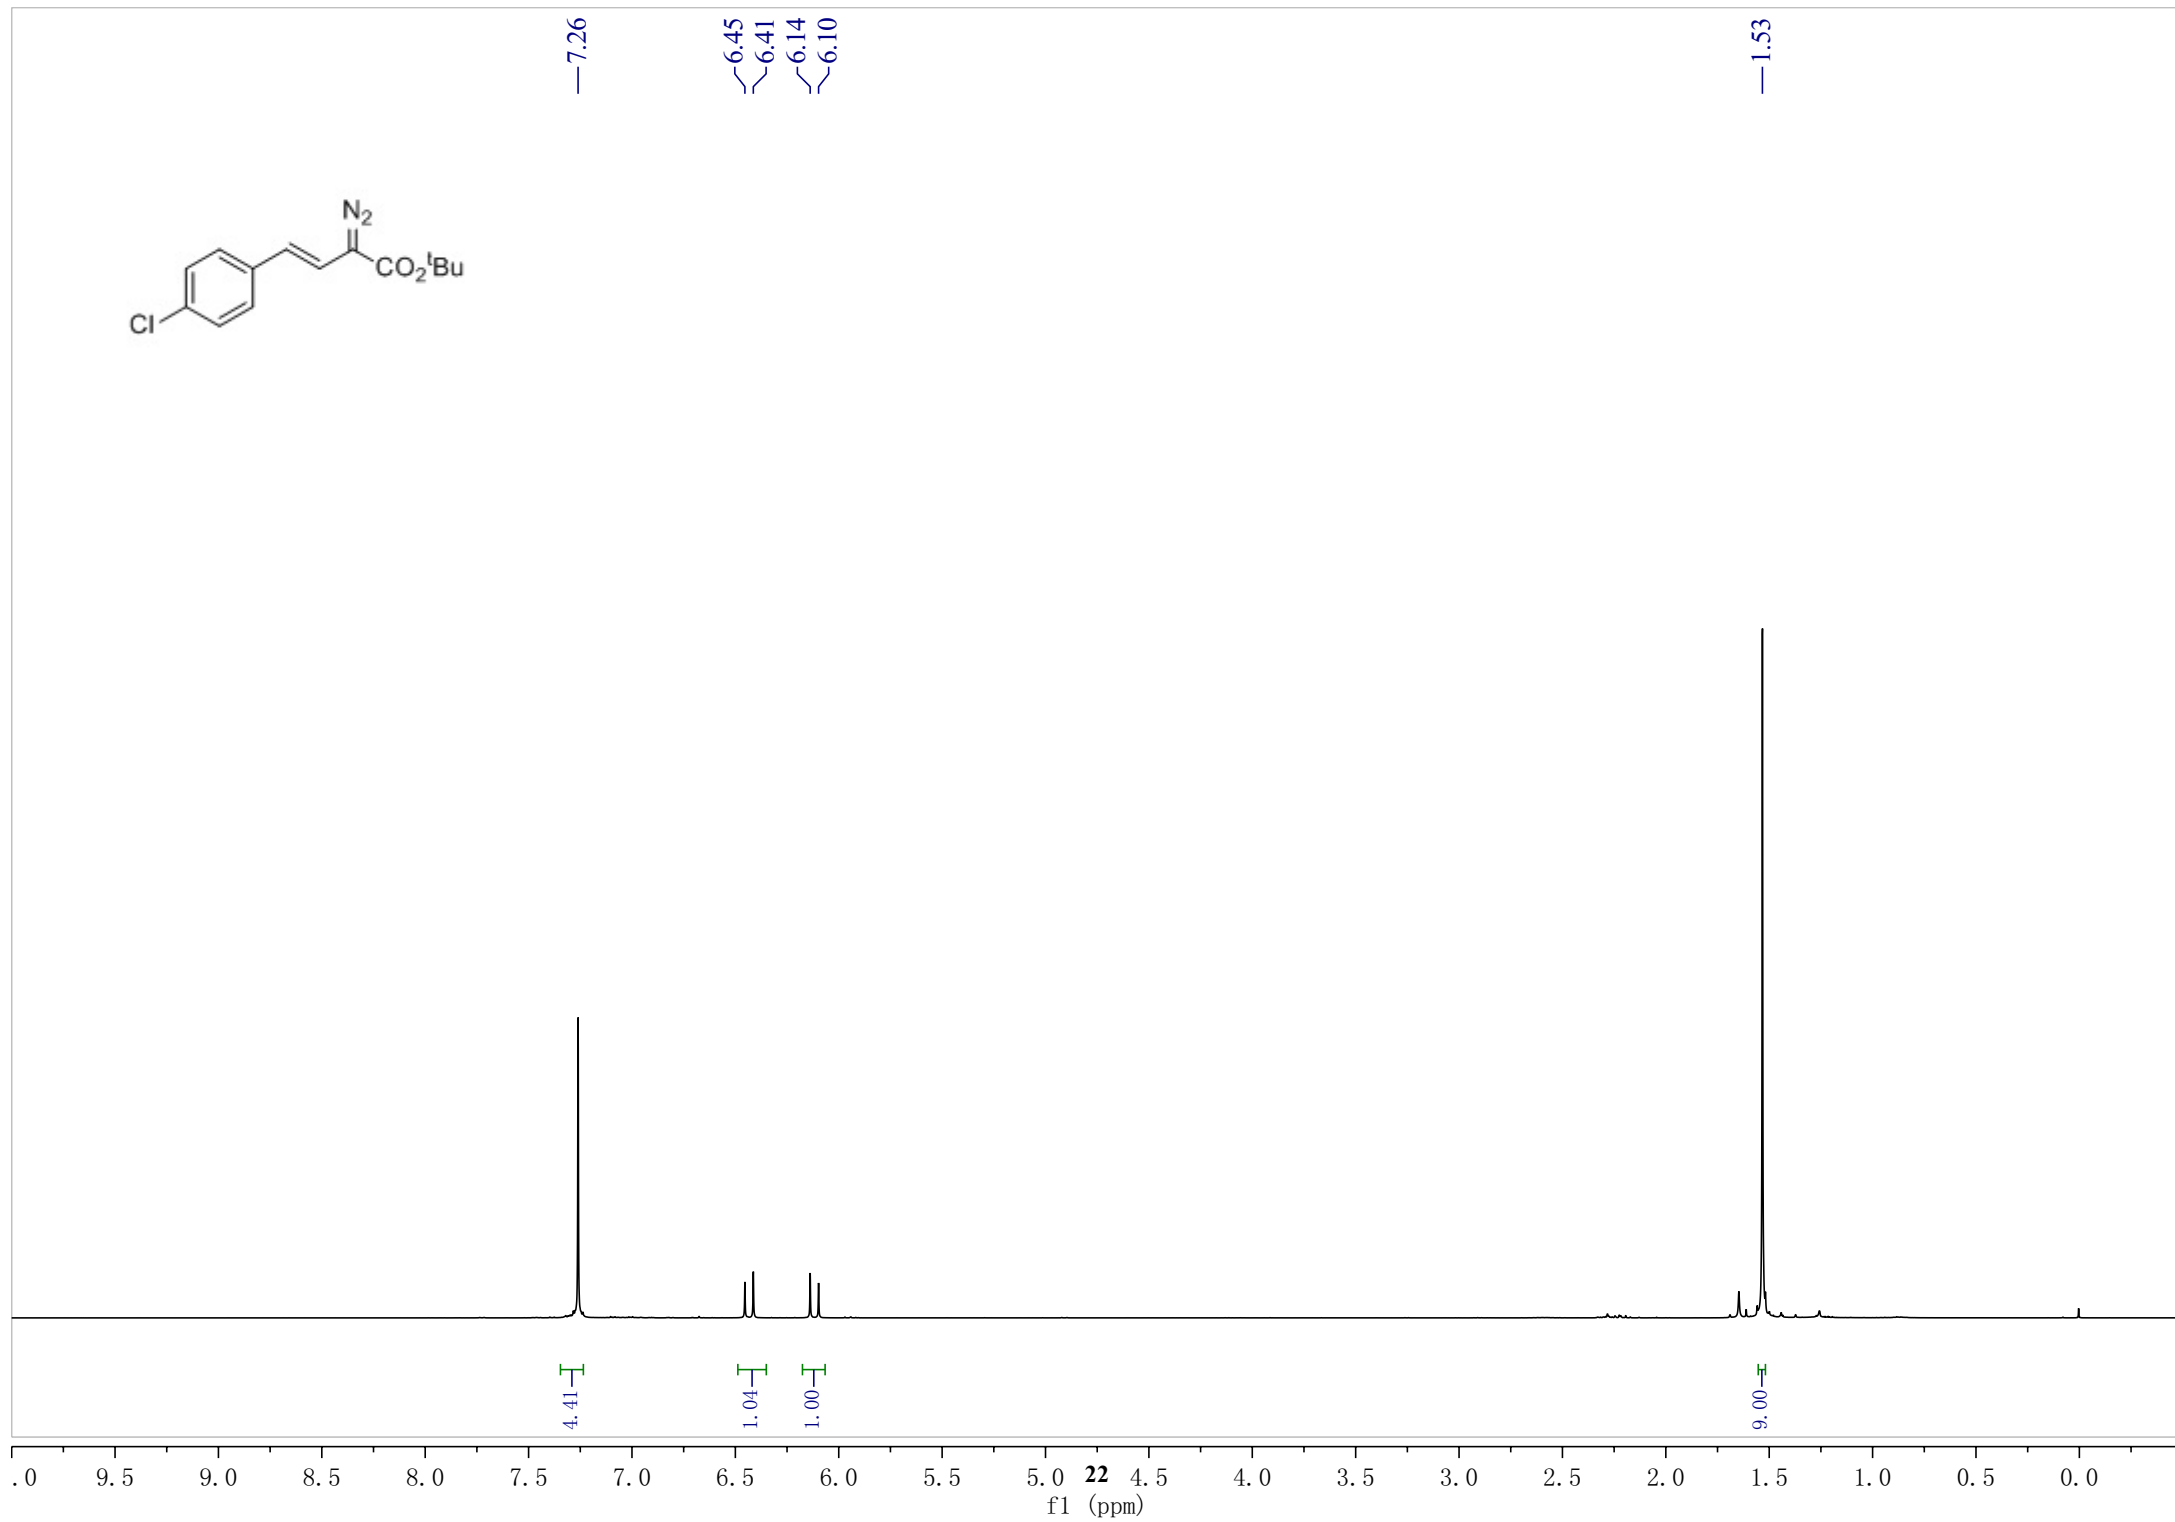

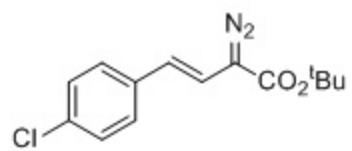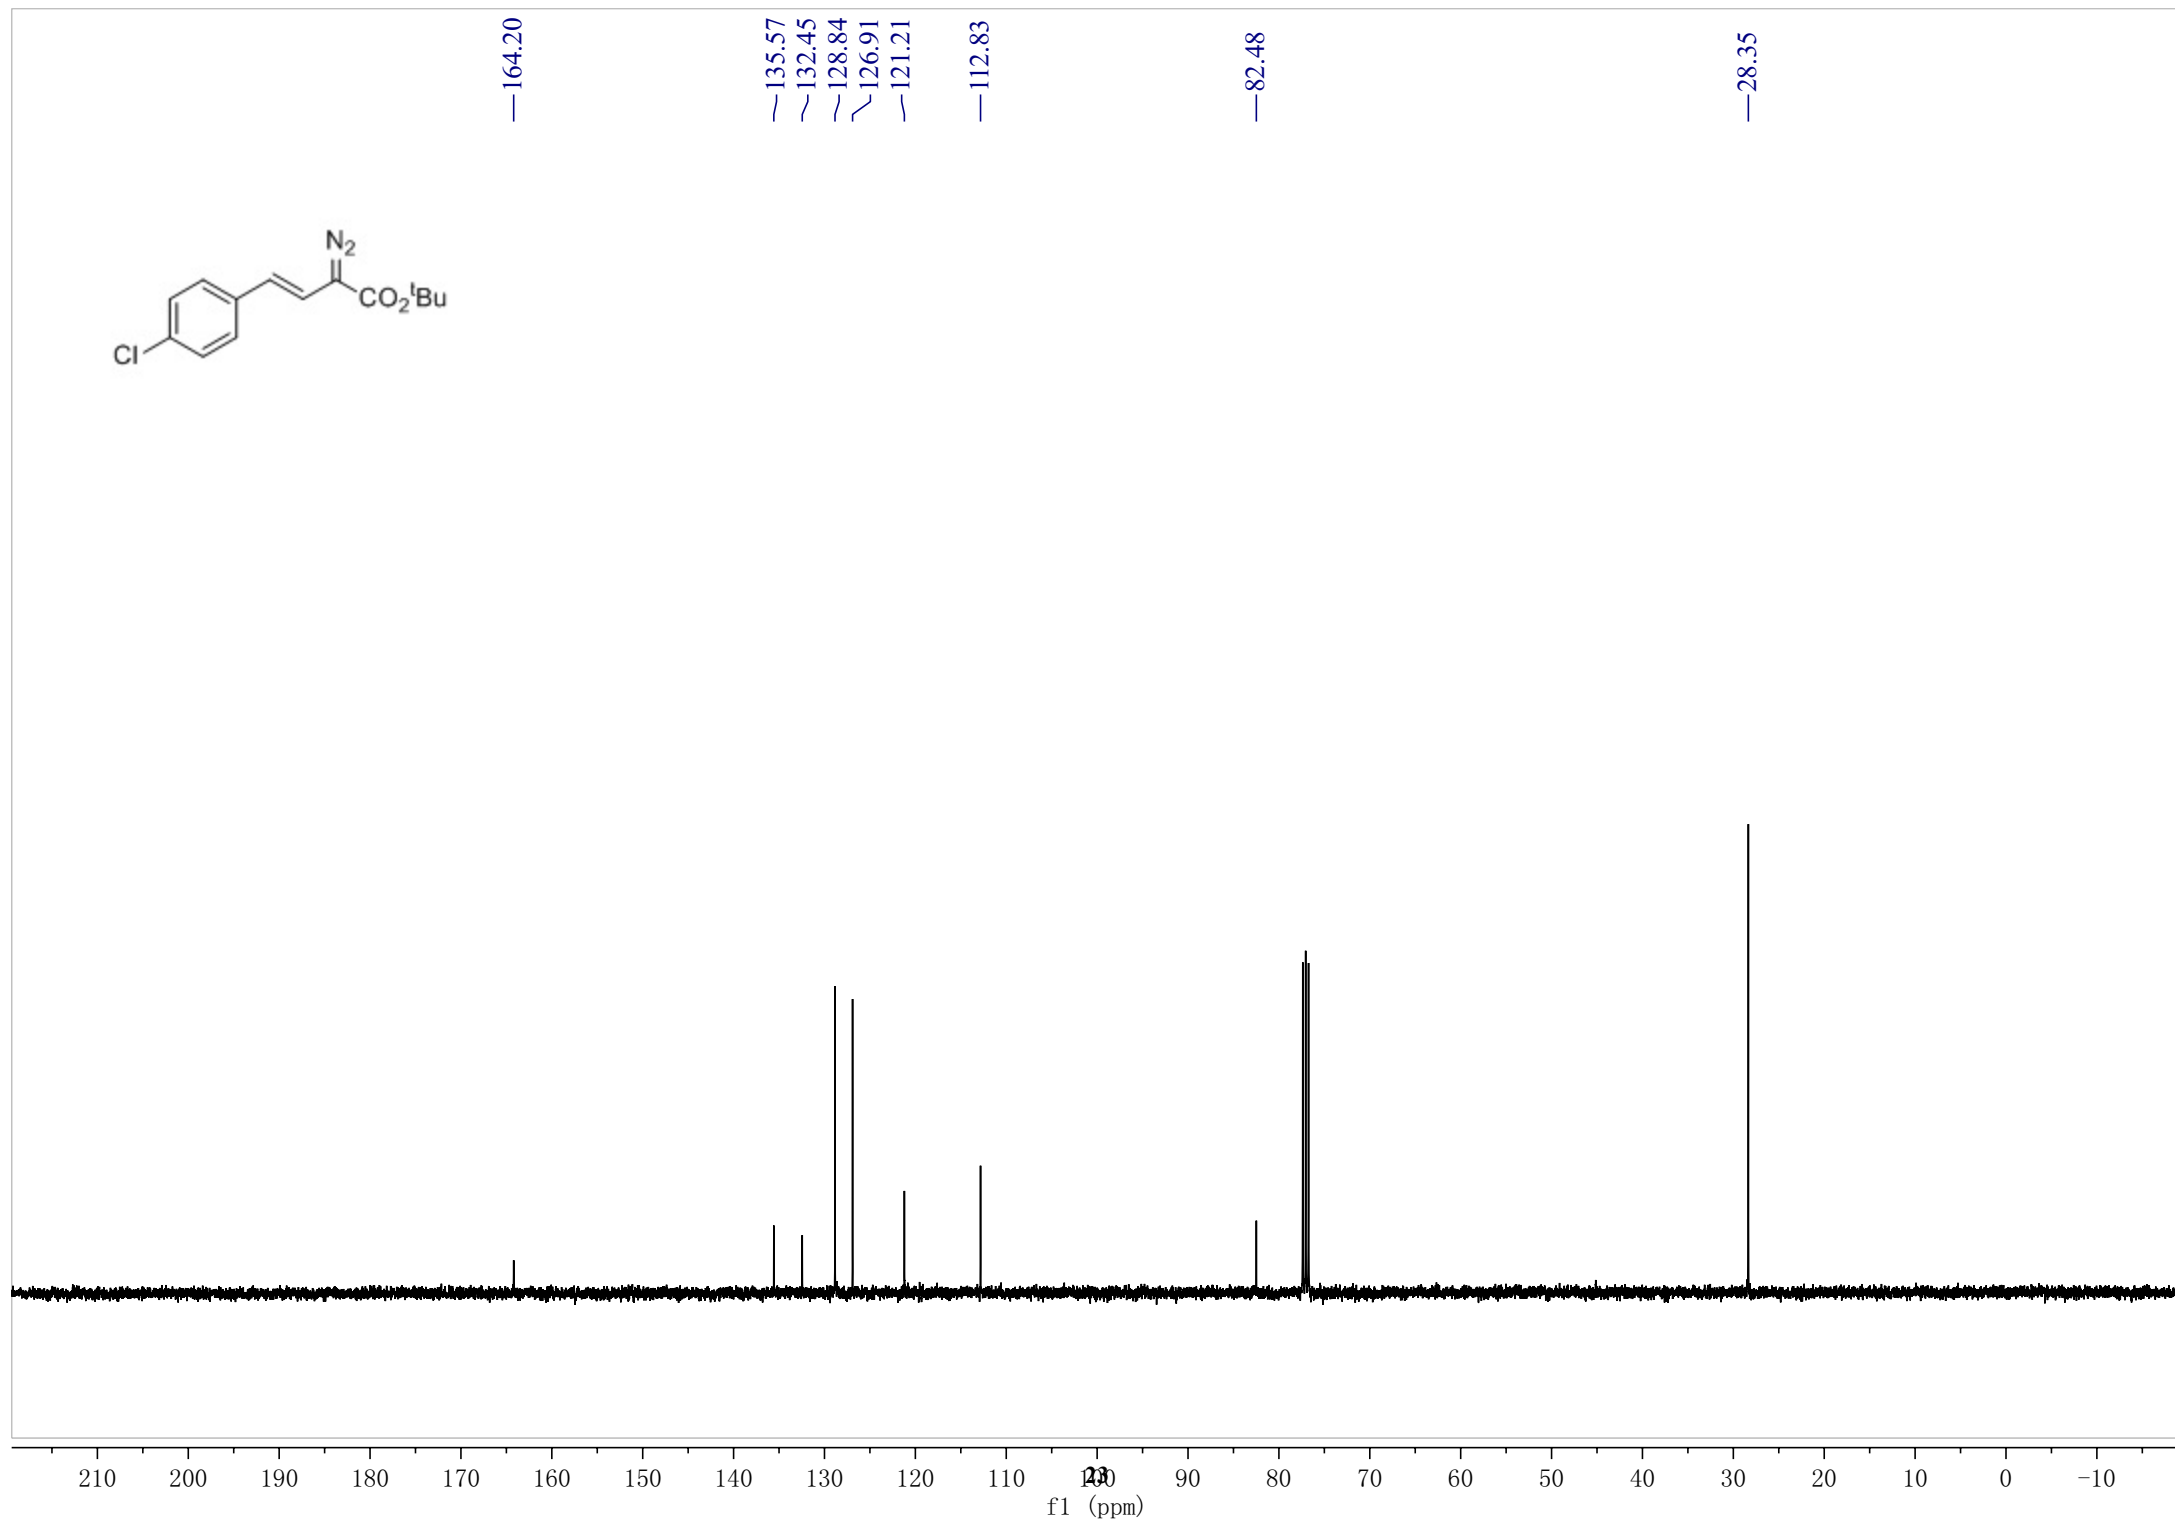

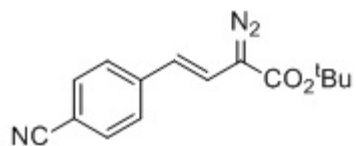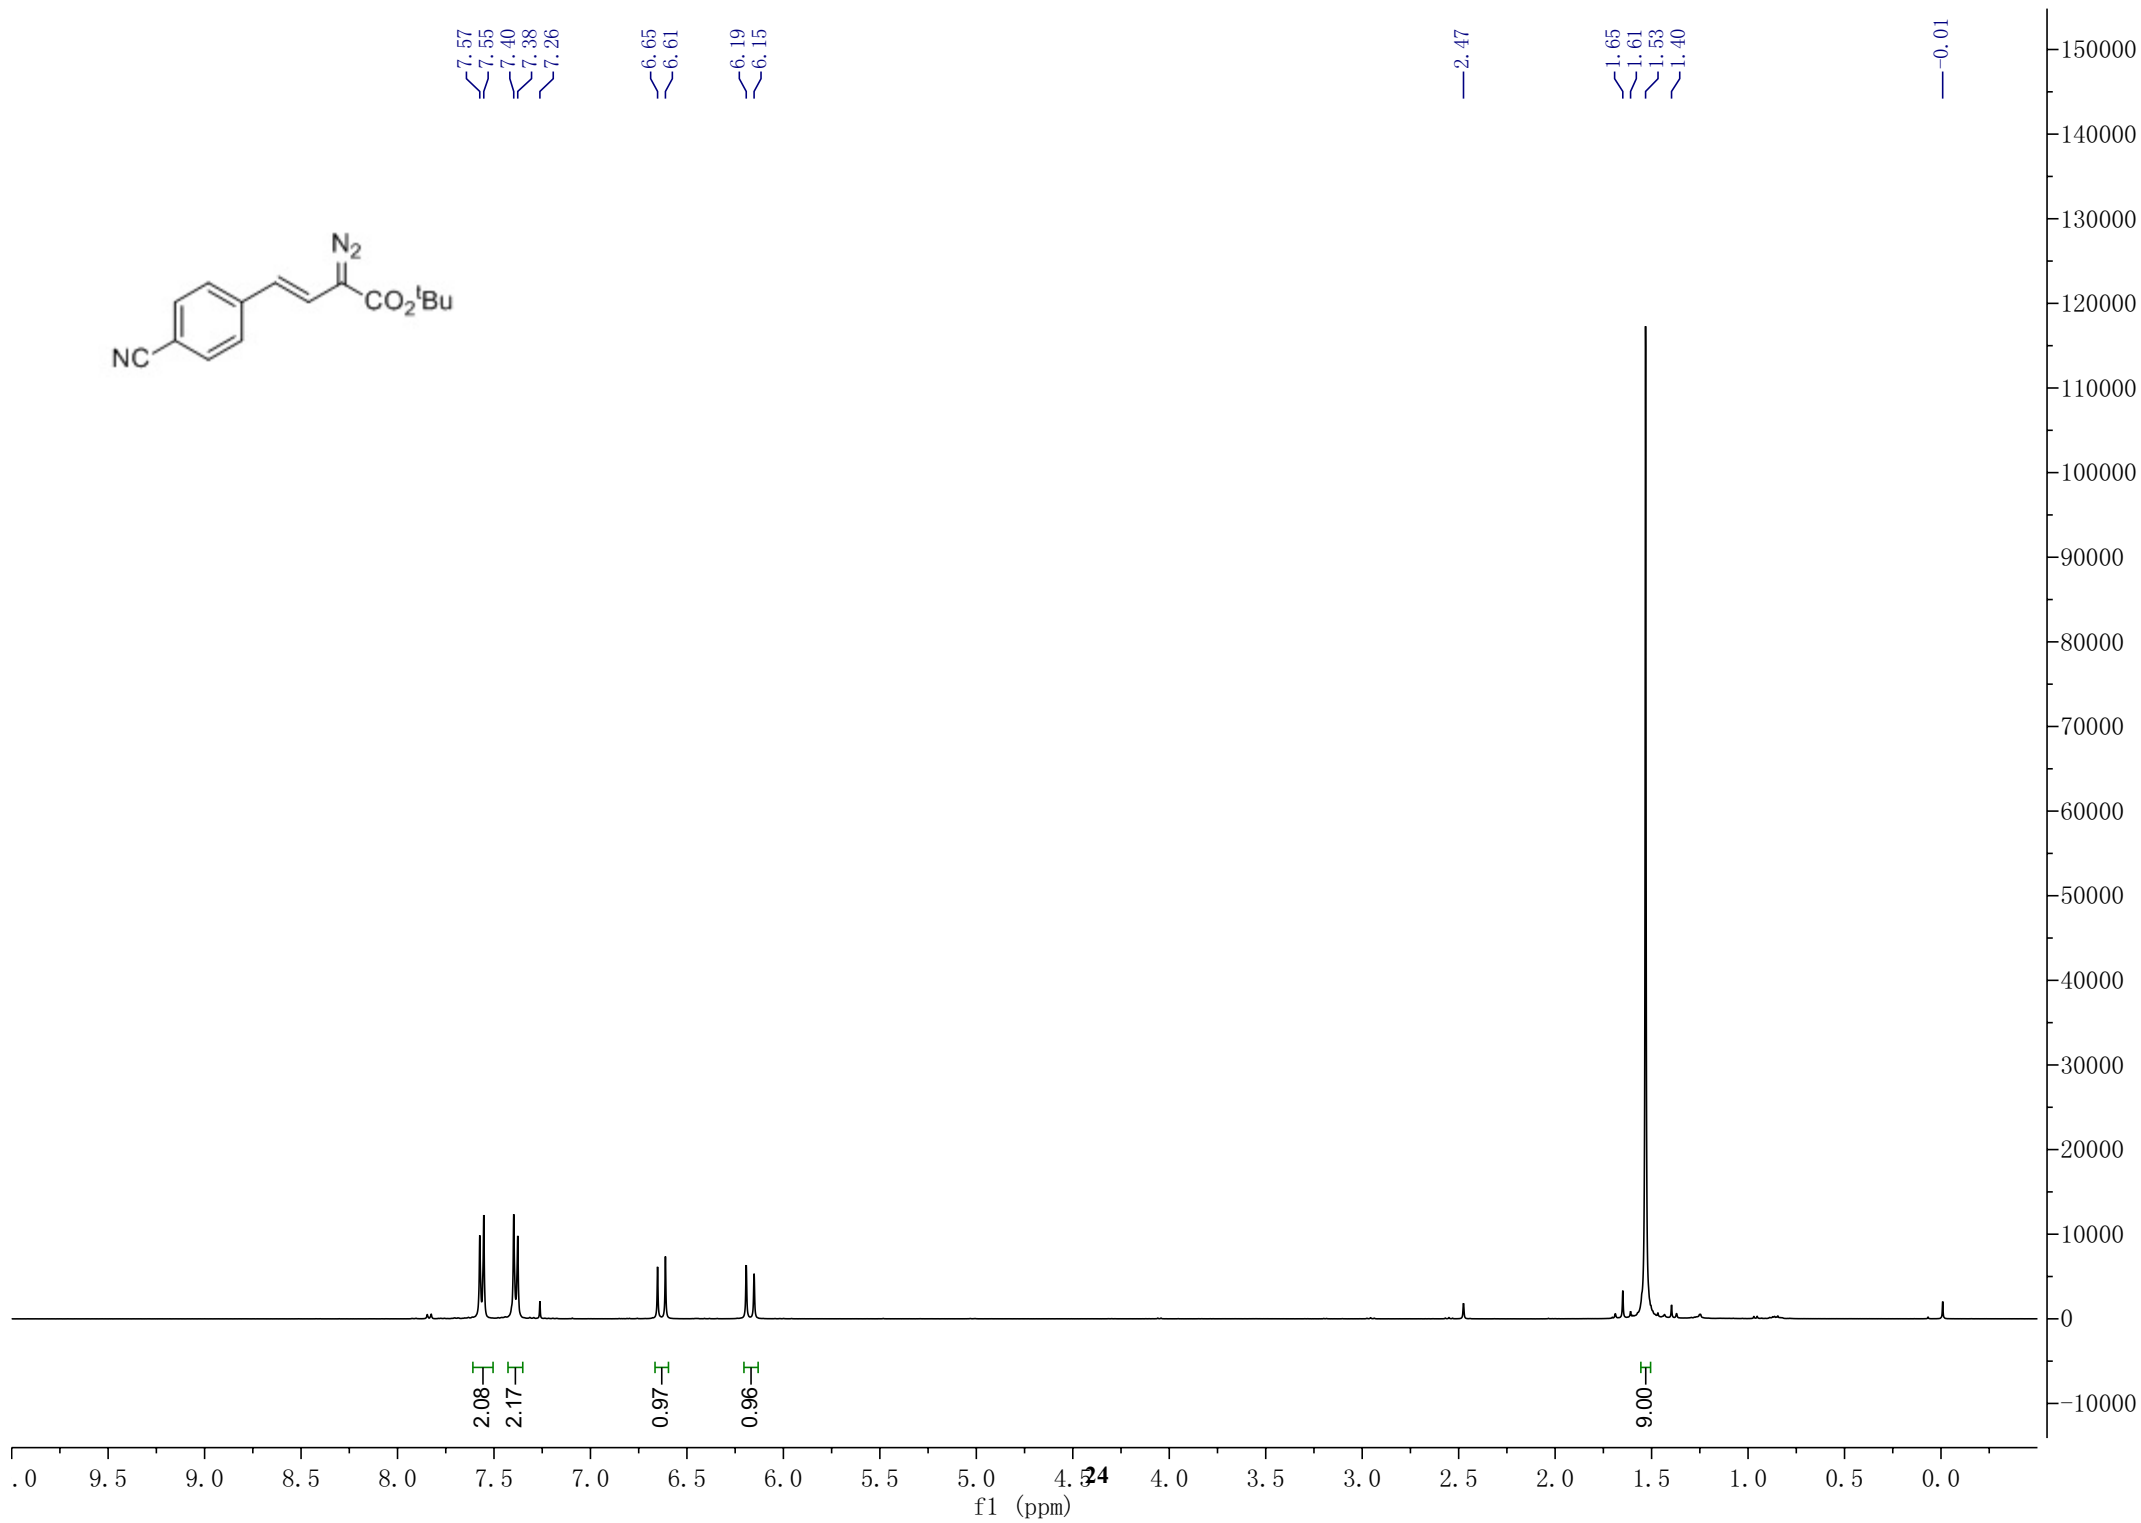

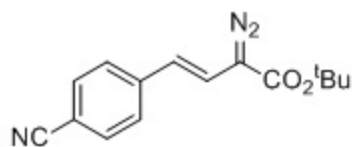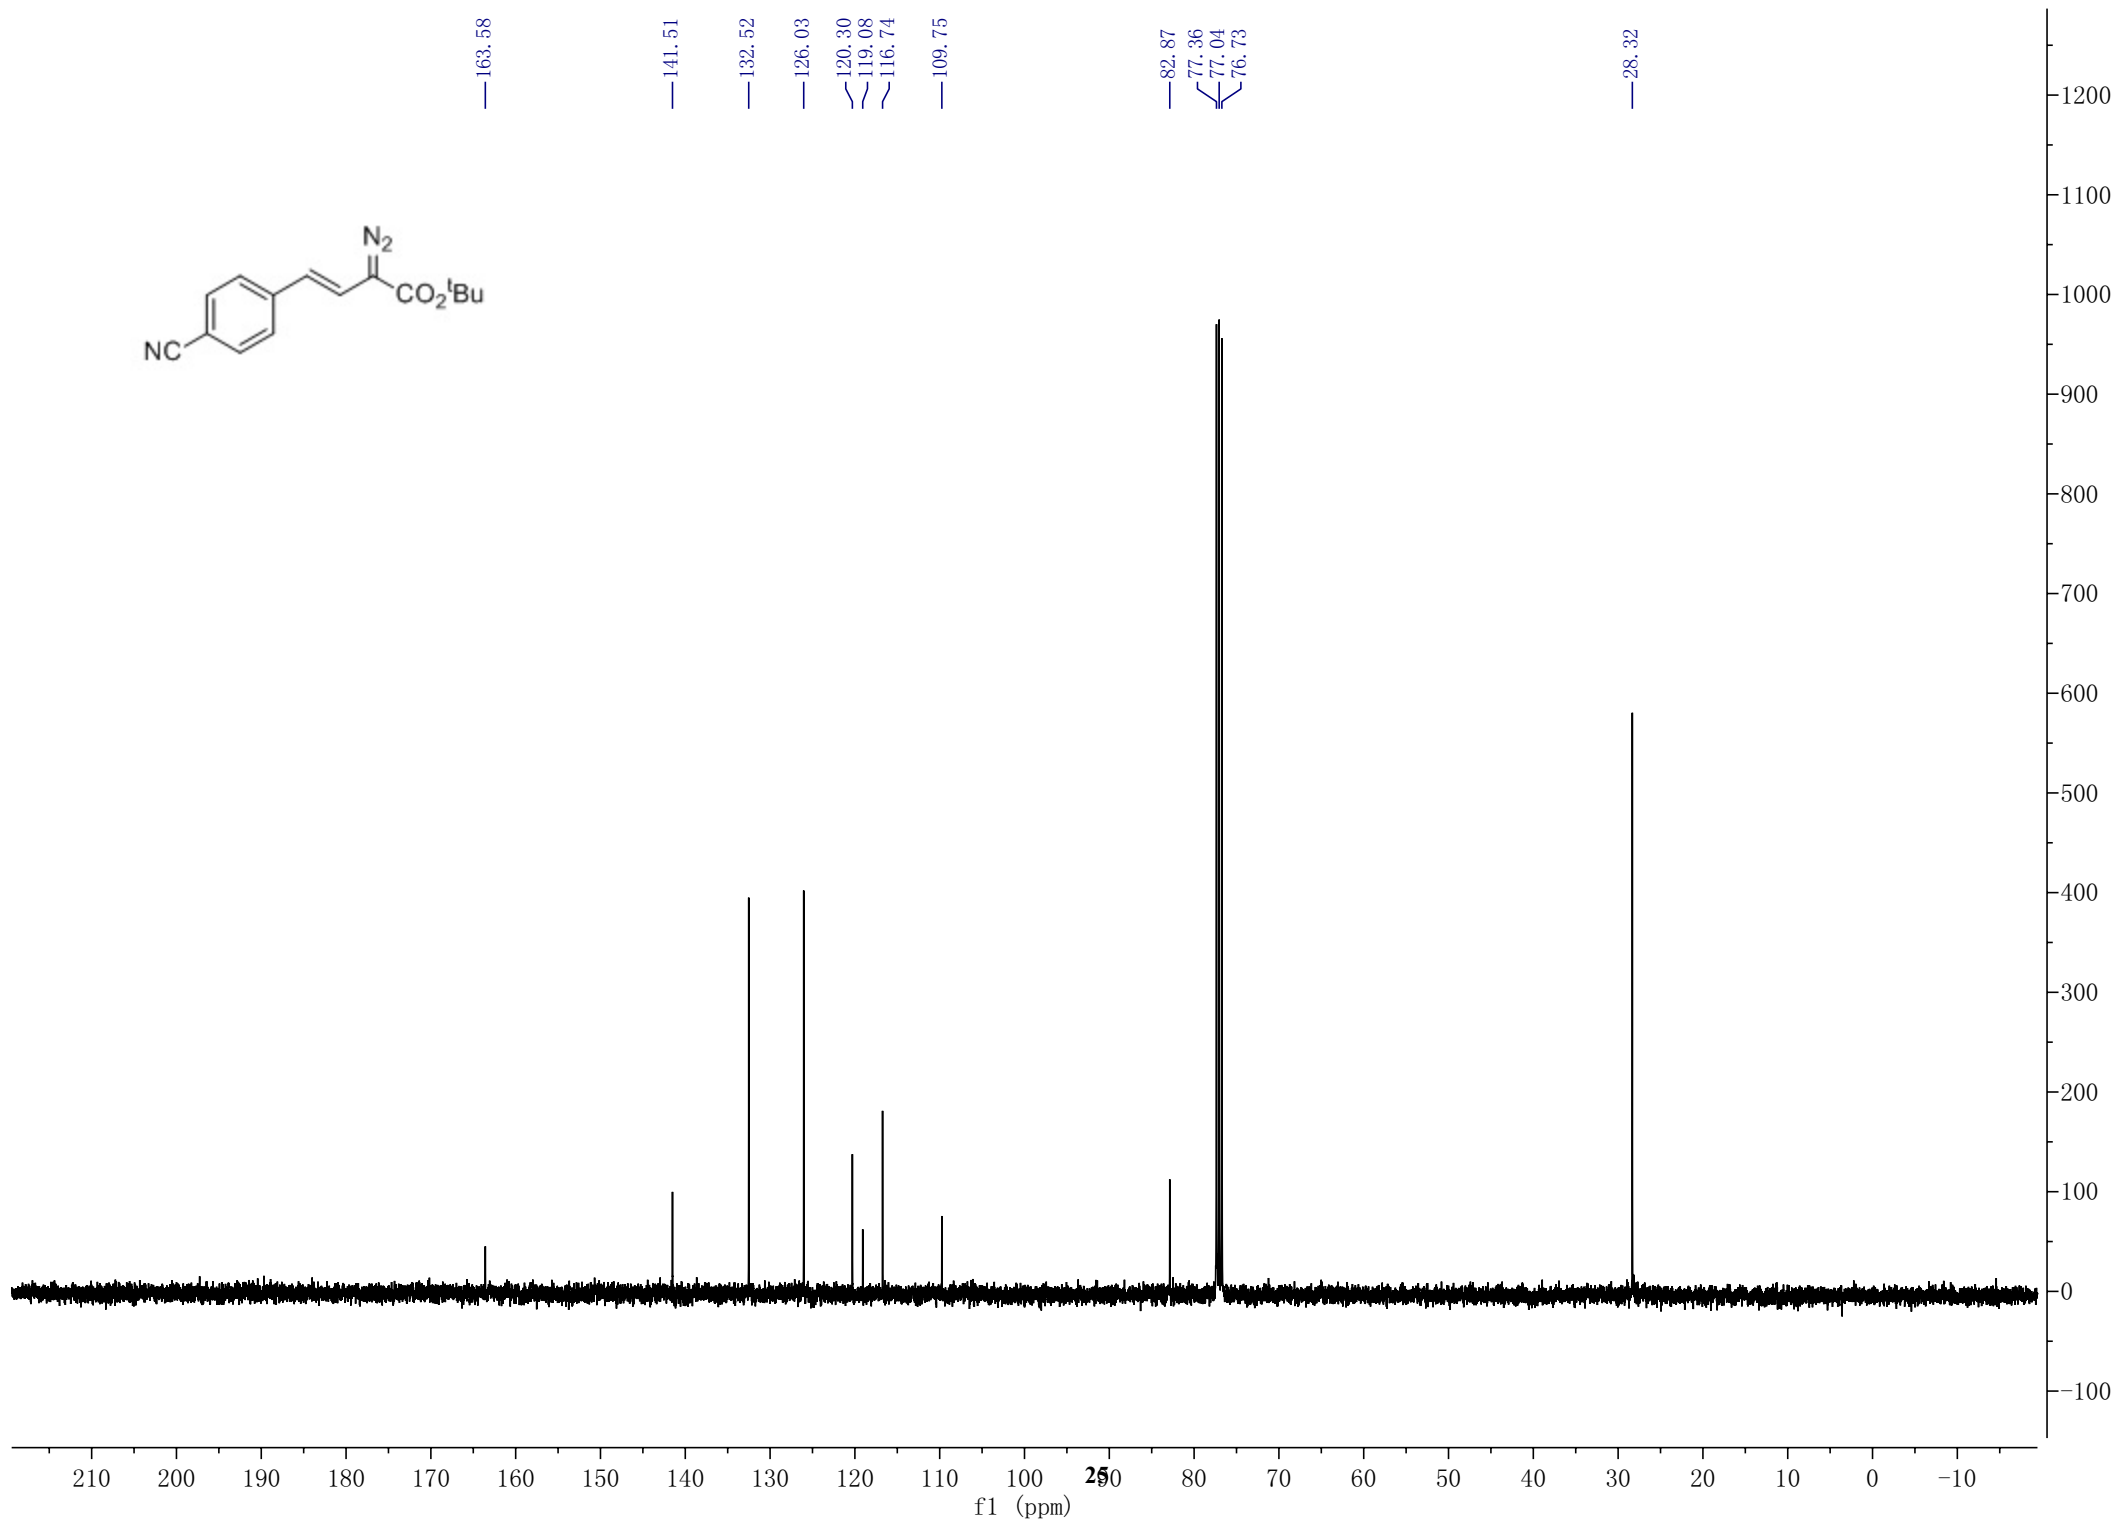

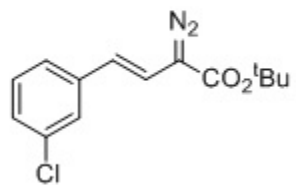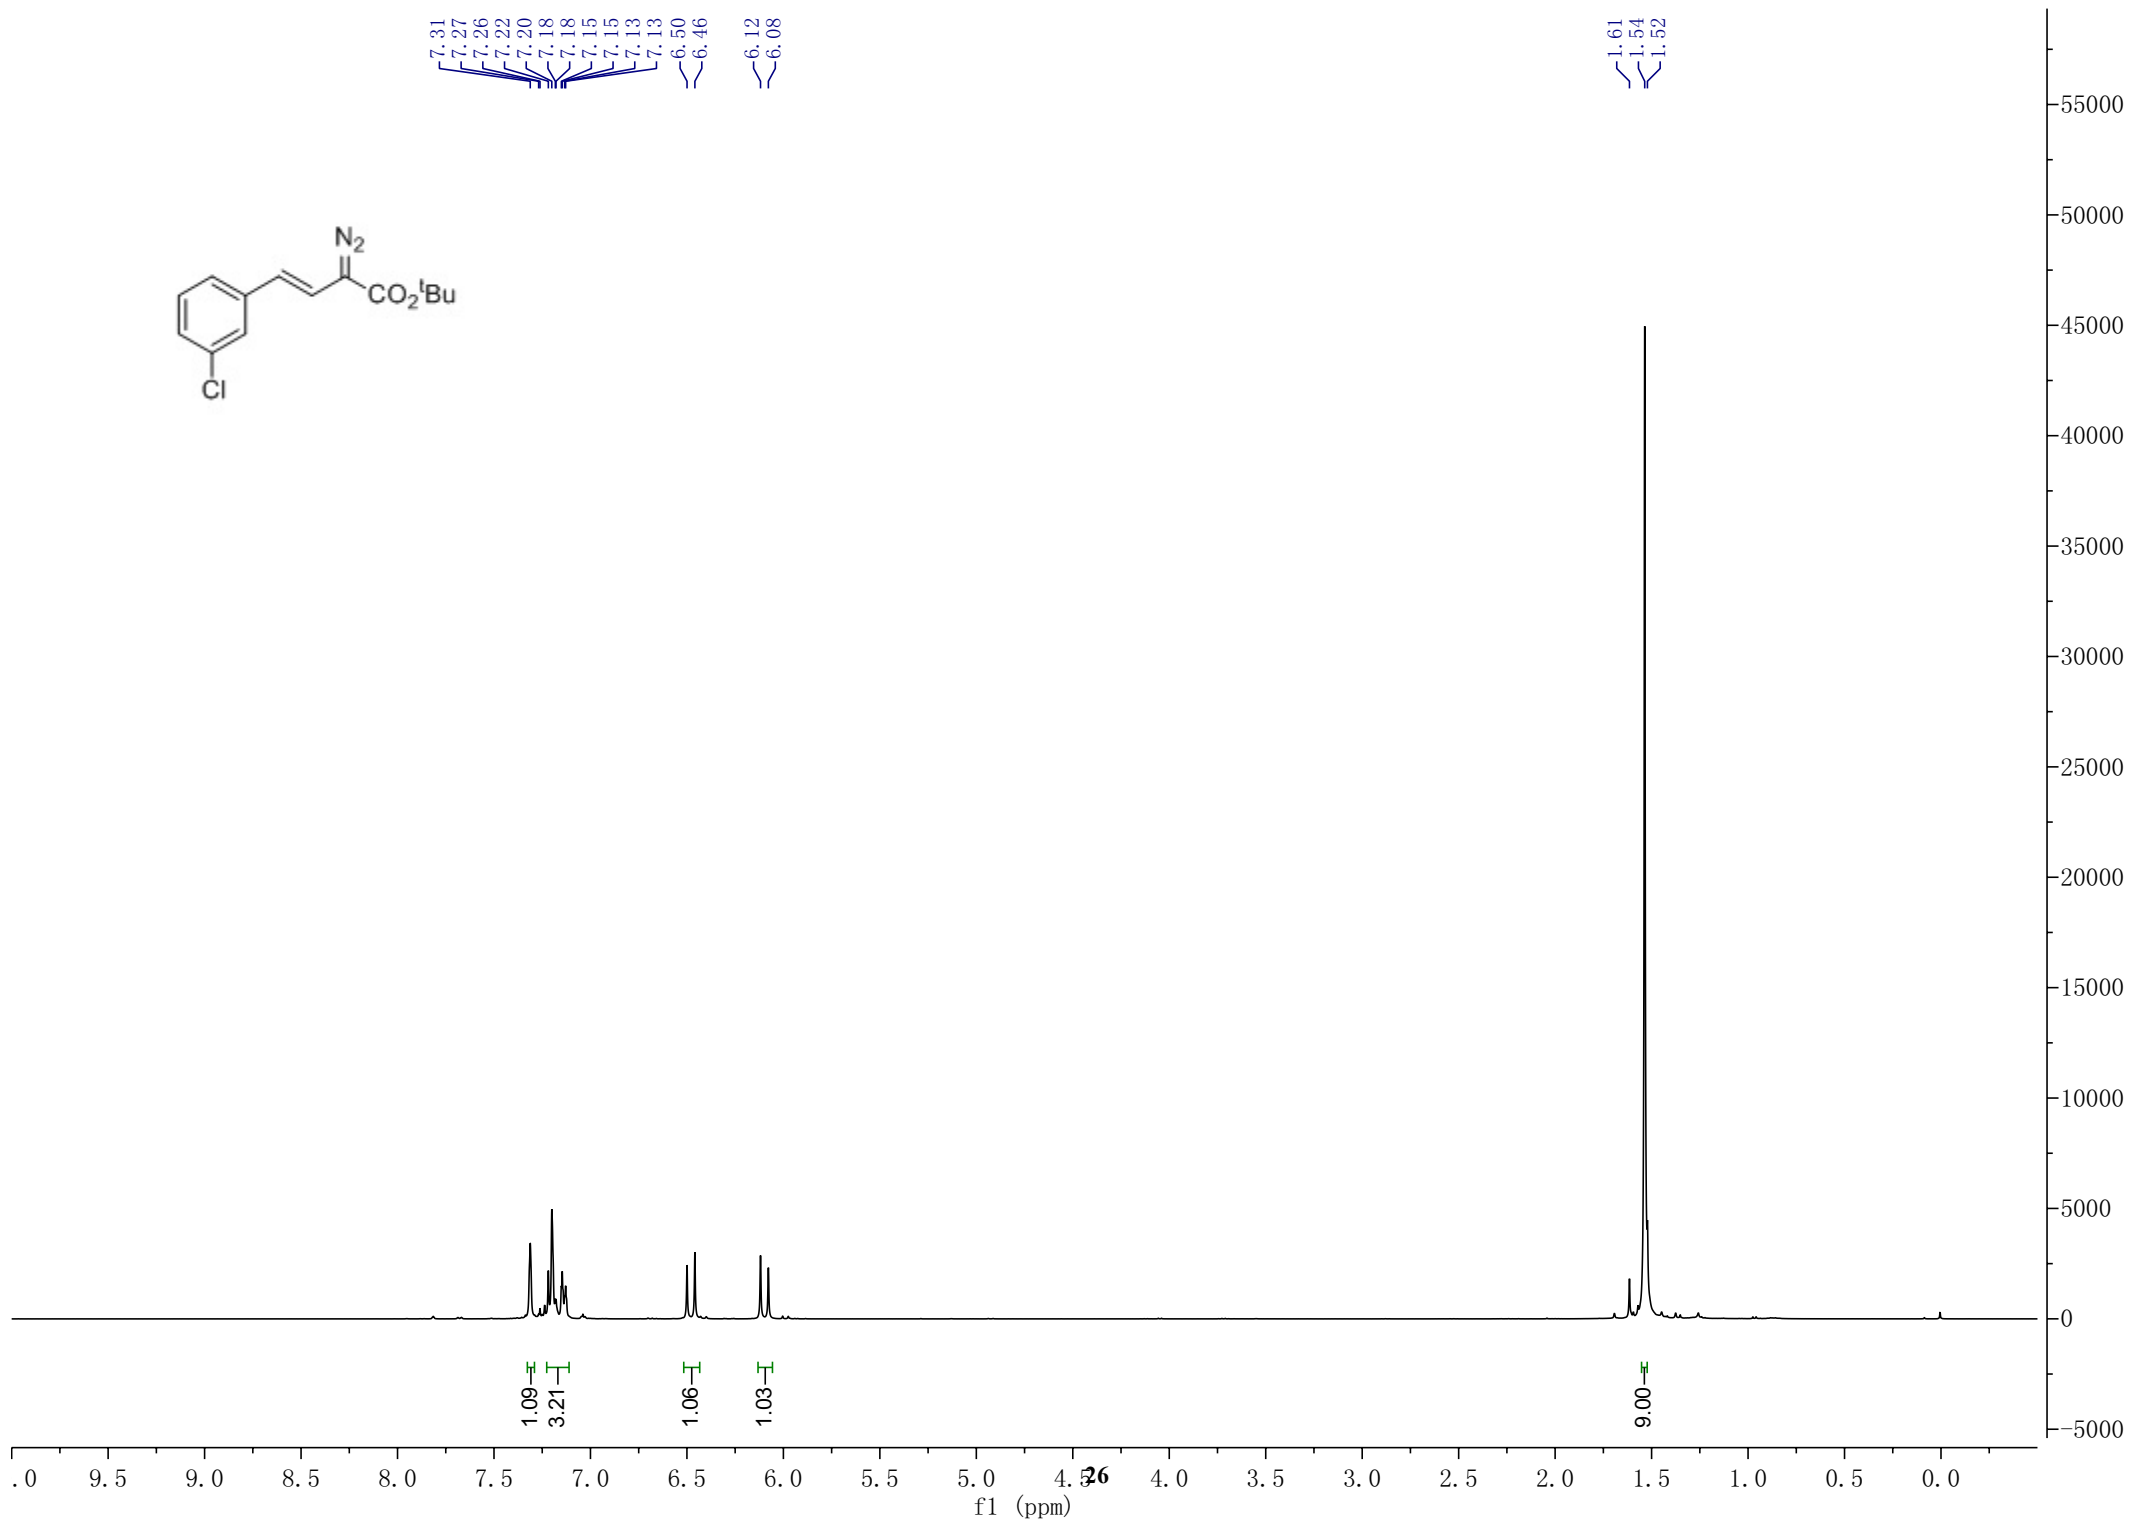

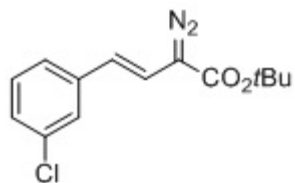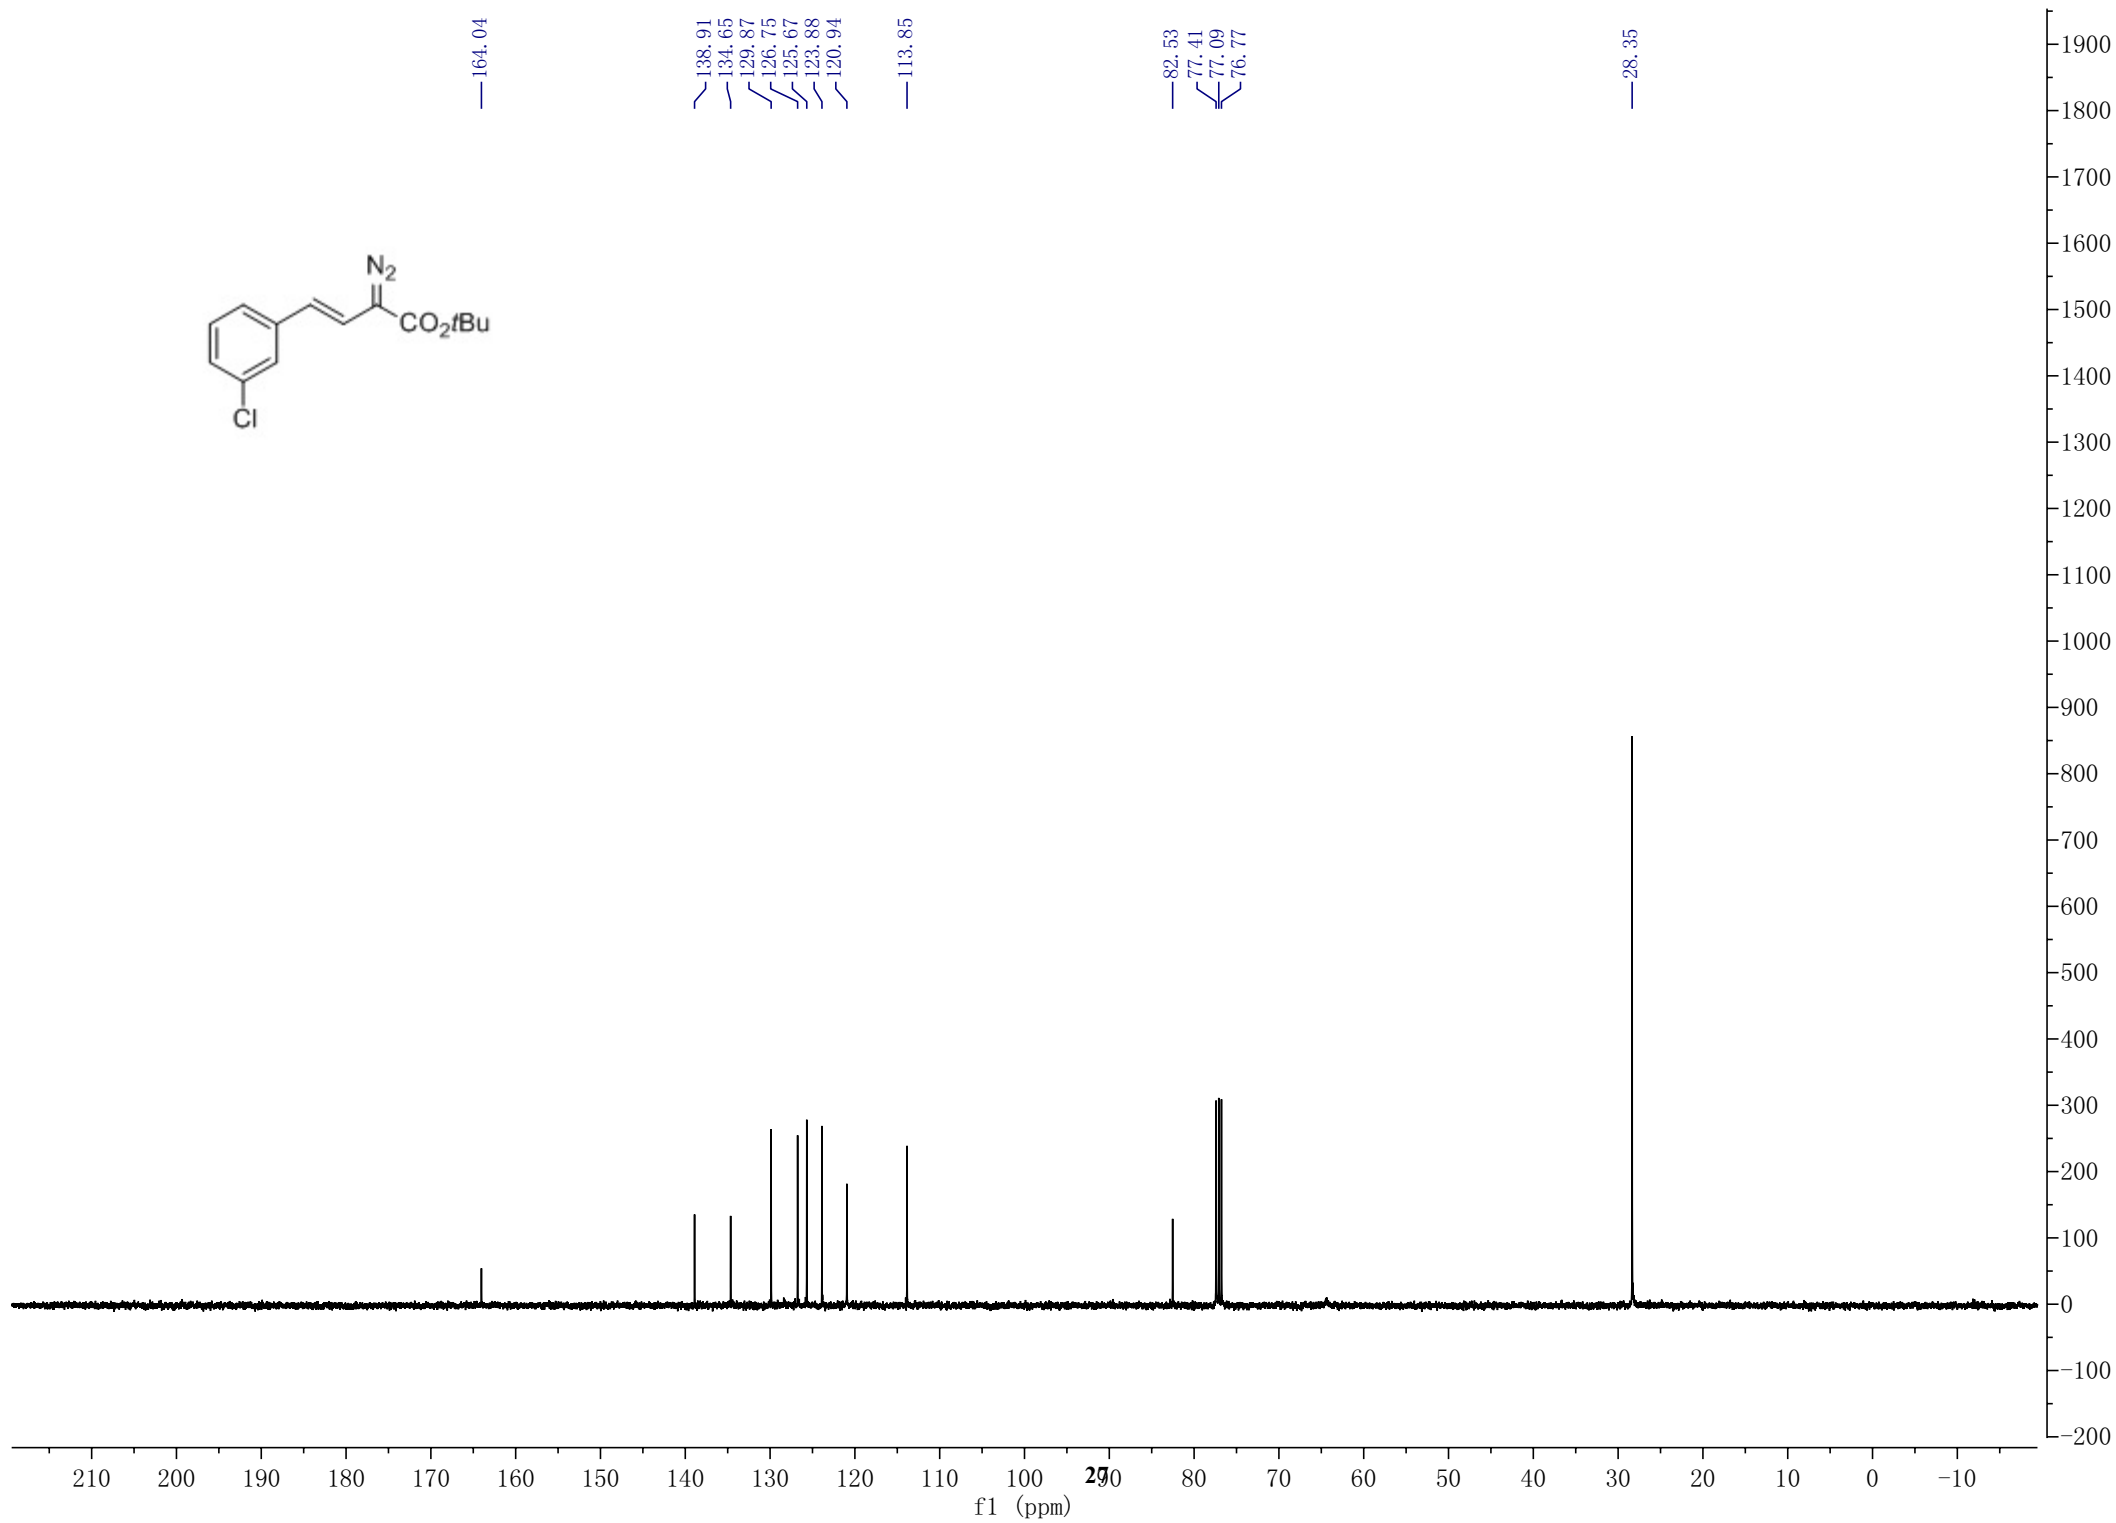

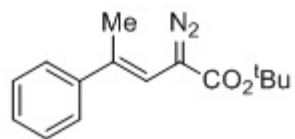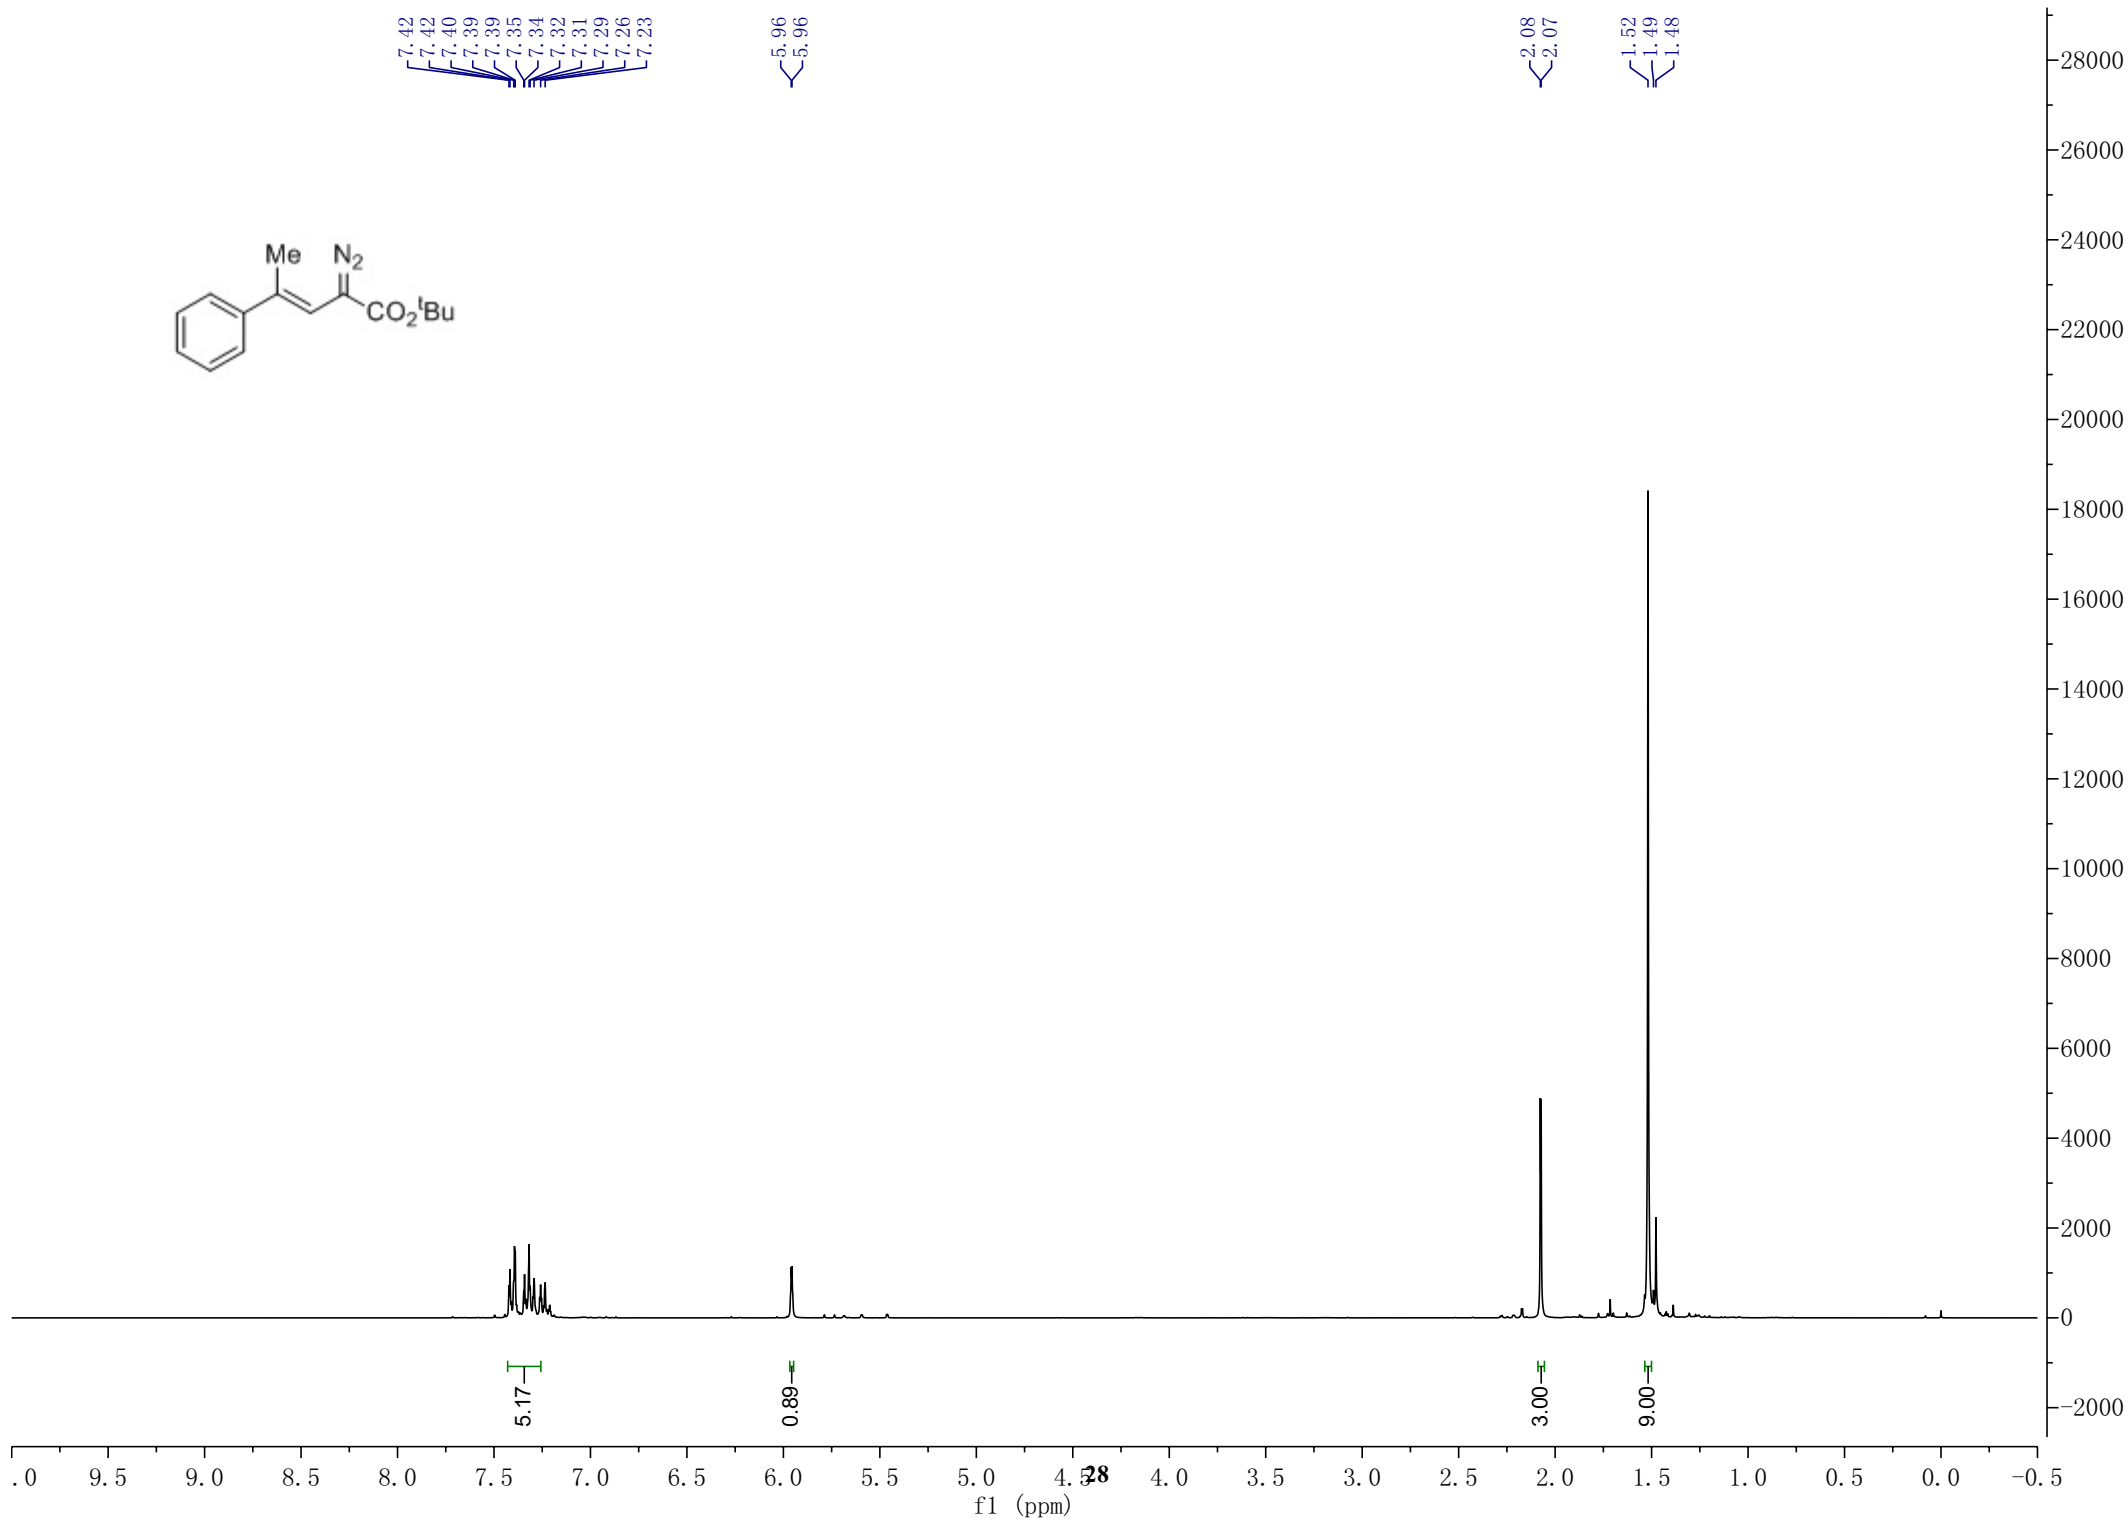

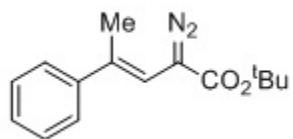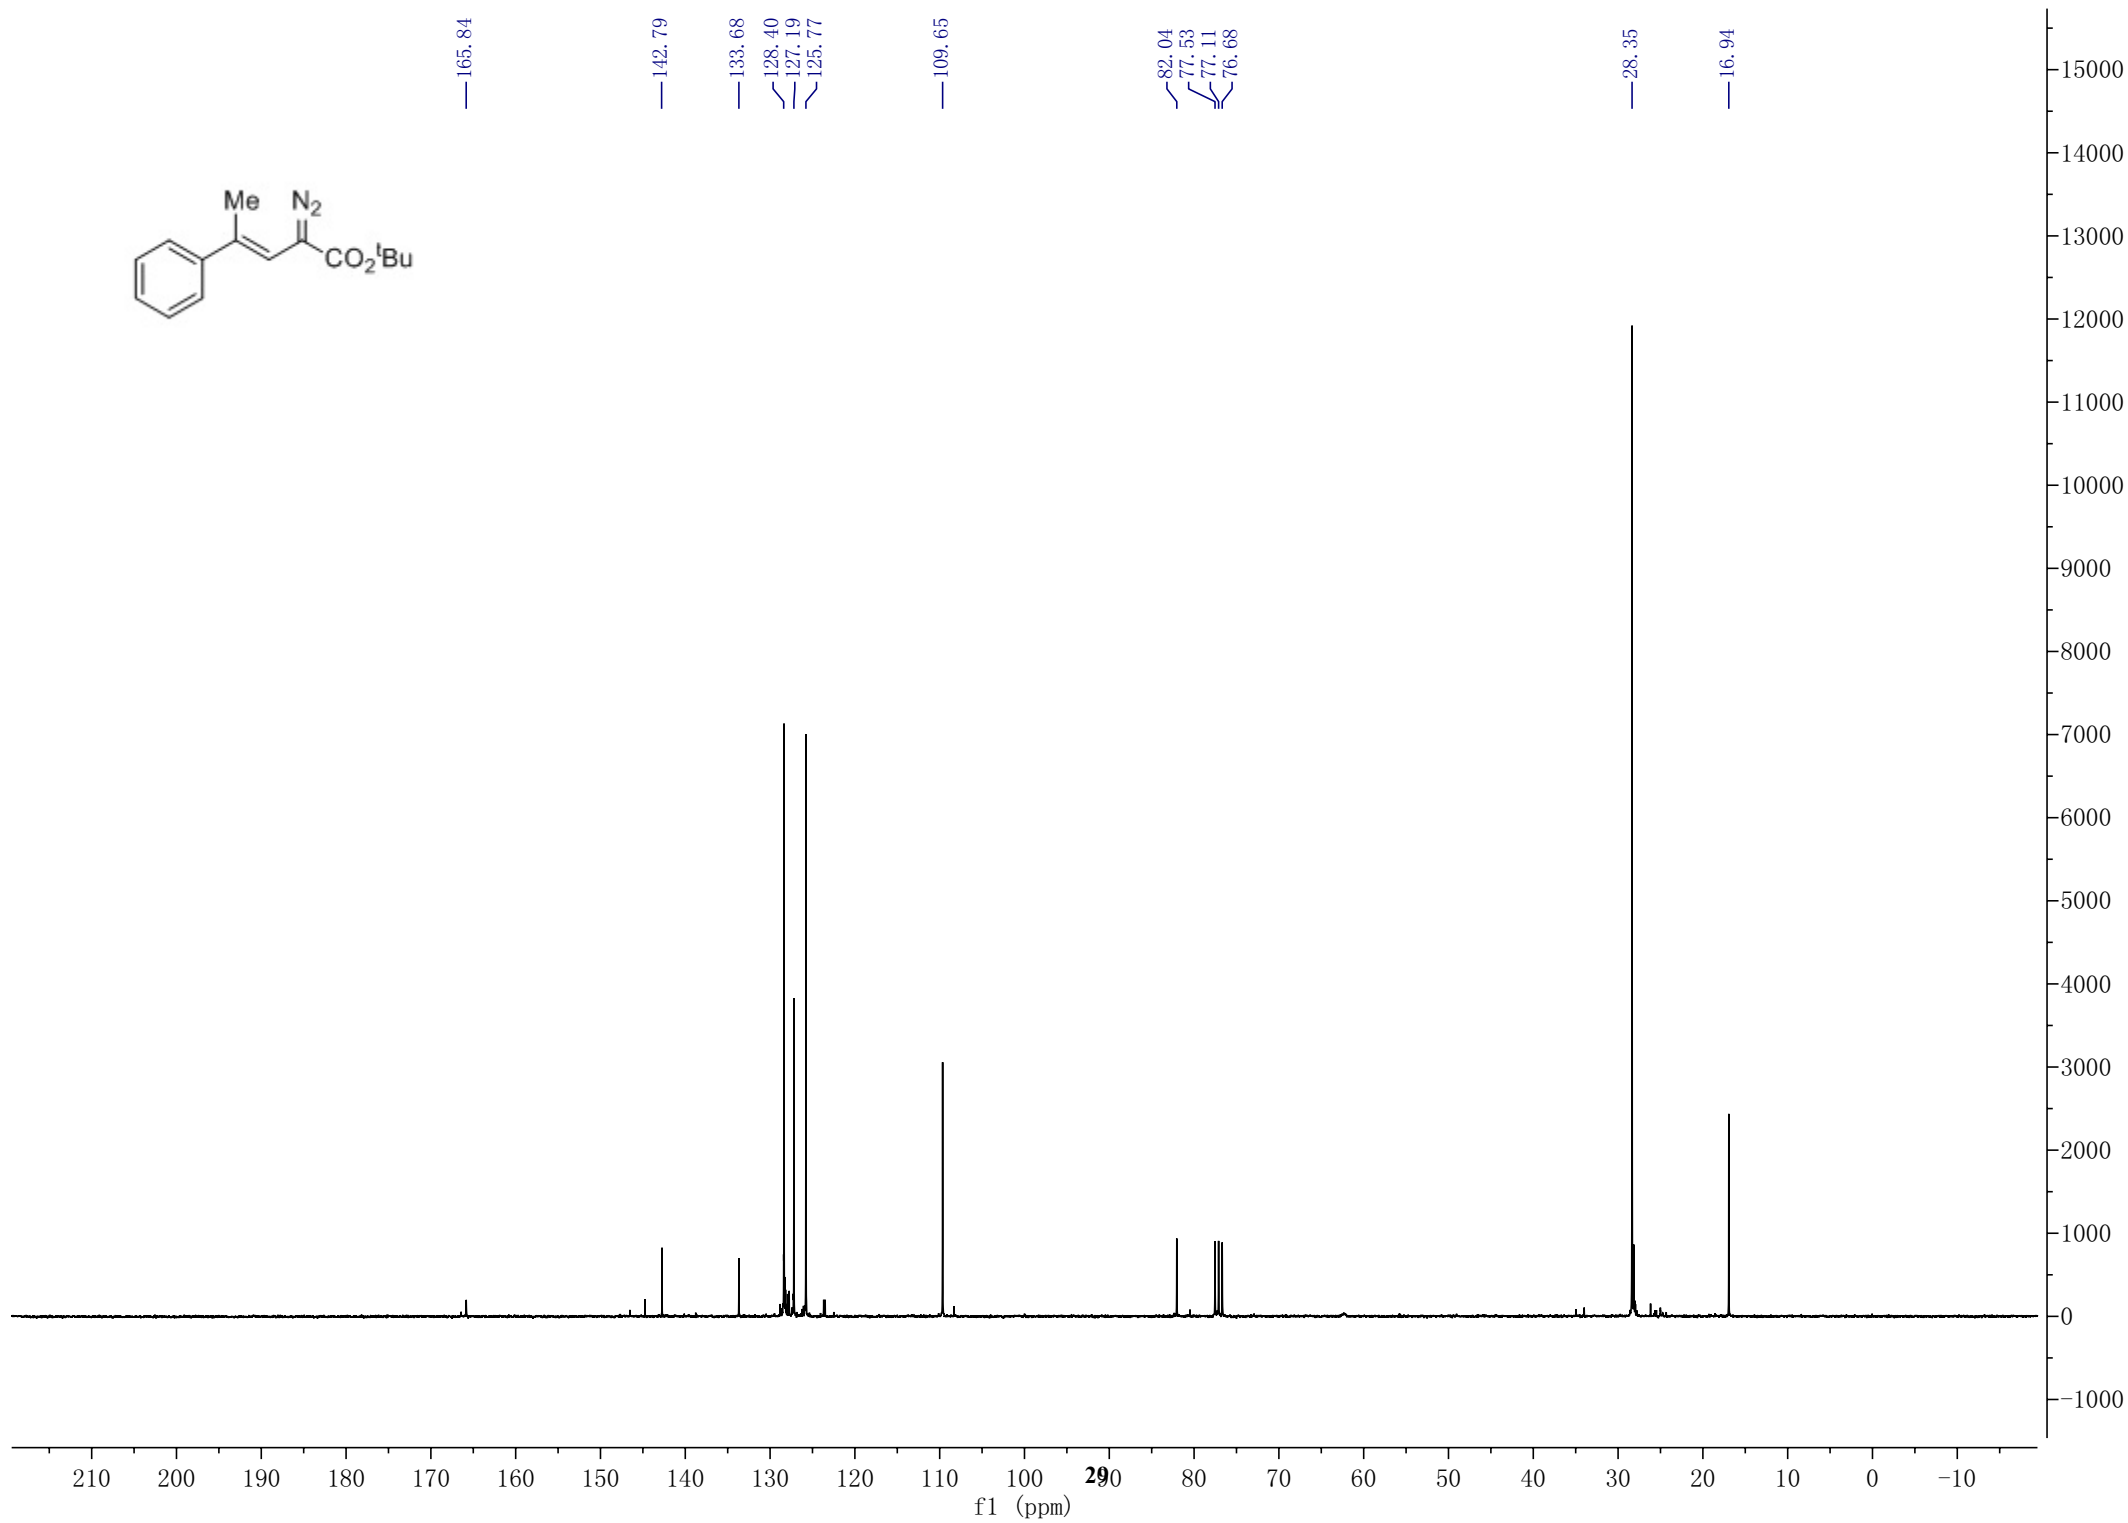

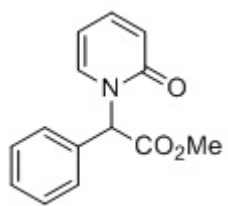

6

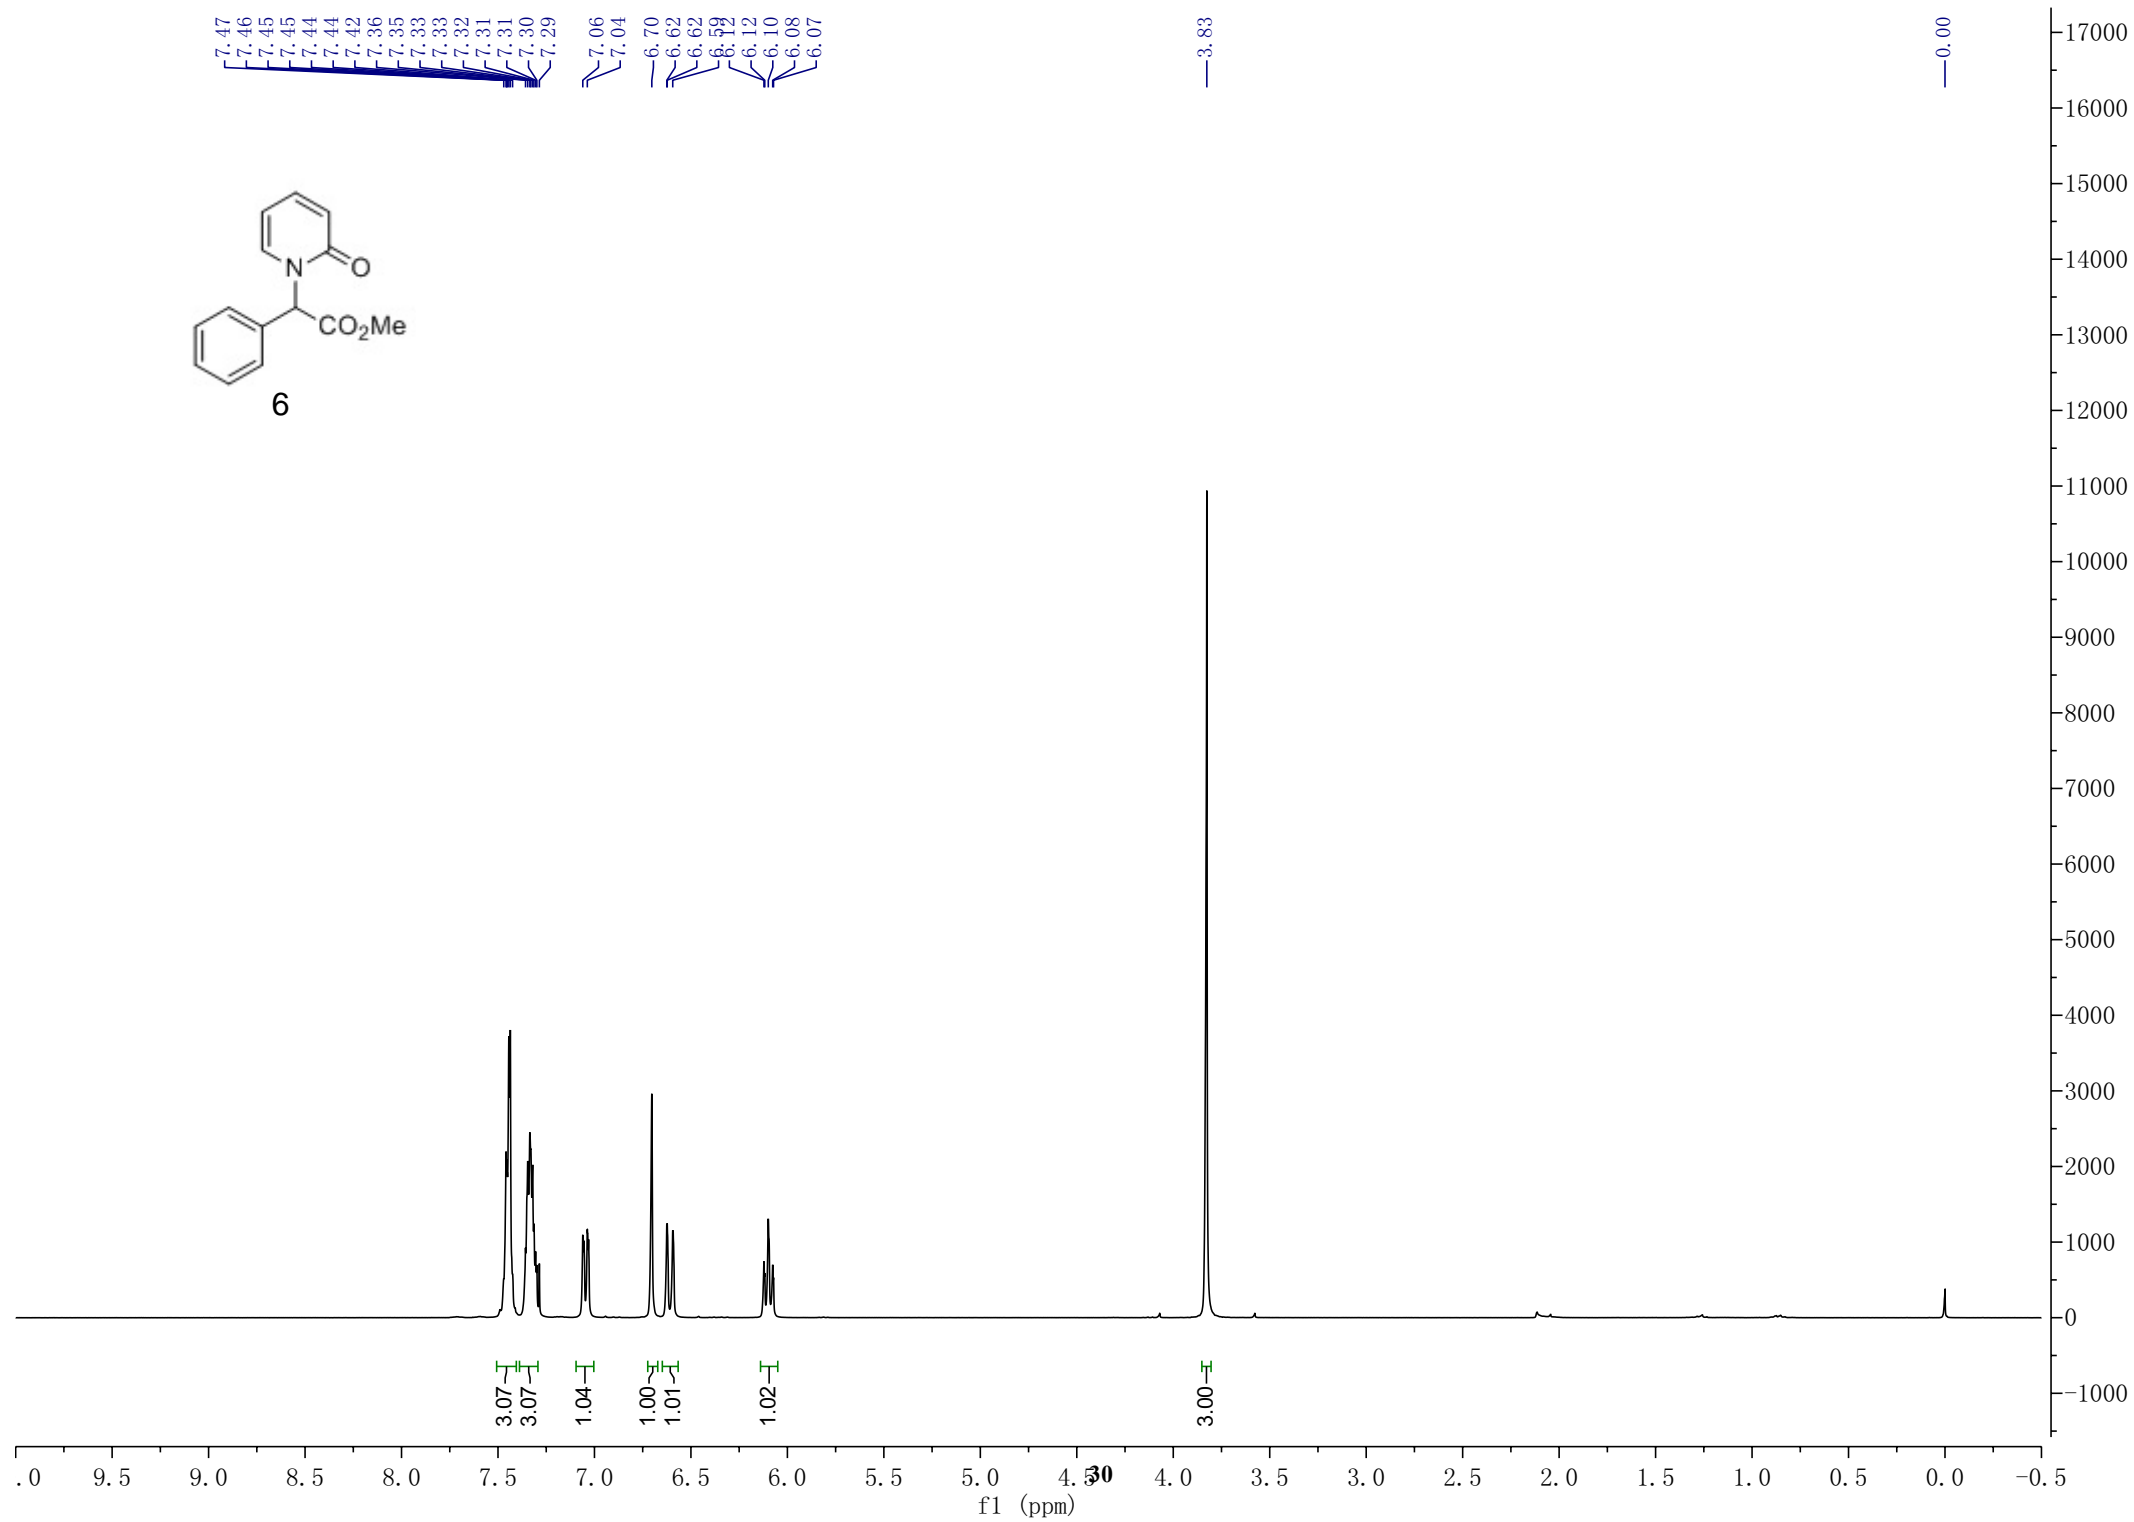

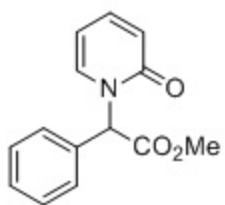

6

169.76 162.60 139.77 135.47 133.08 129.53 129.43 120.14 105.92 77.53 77.11 76.69 61.48 52.92

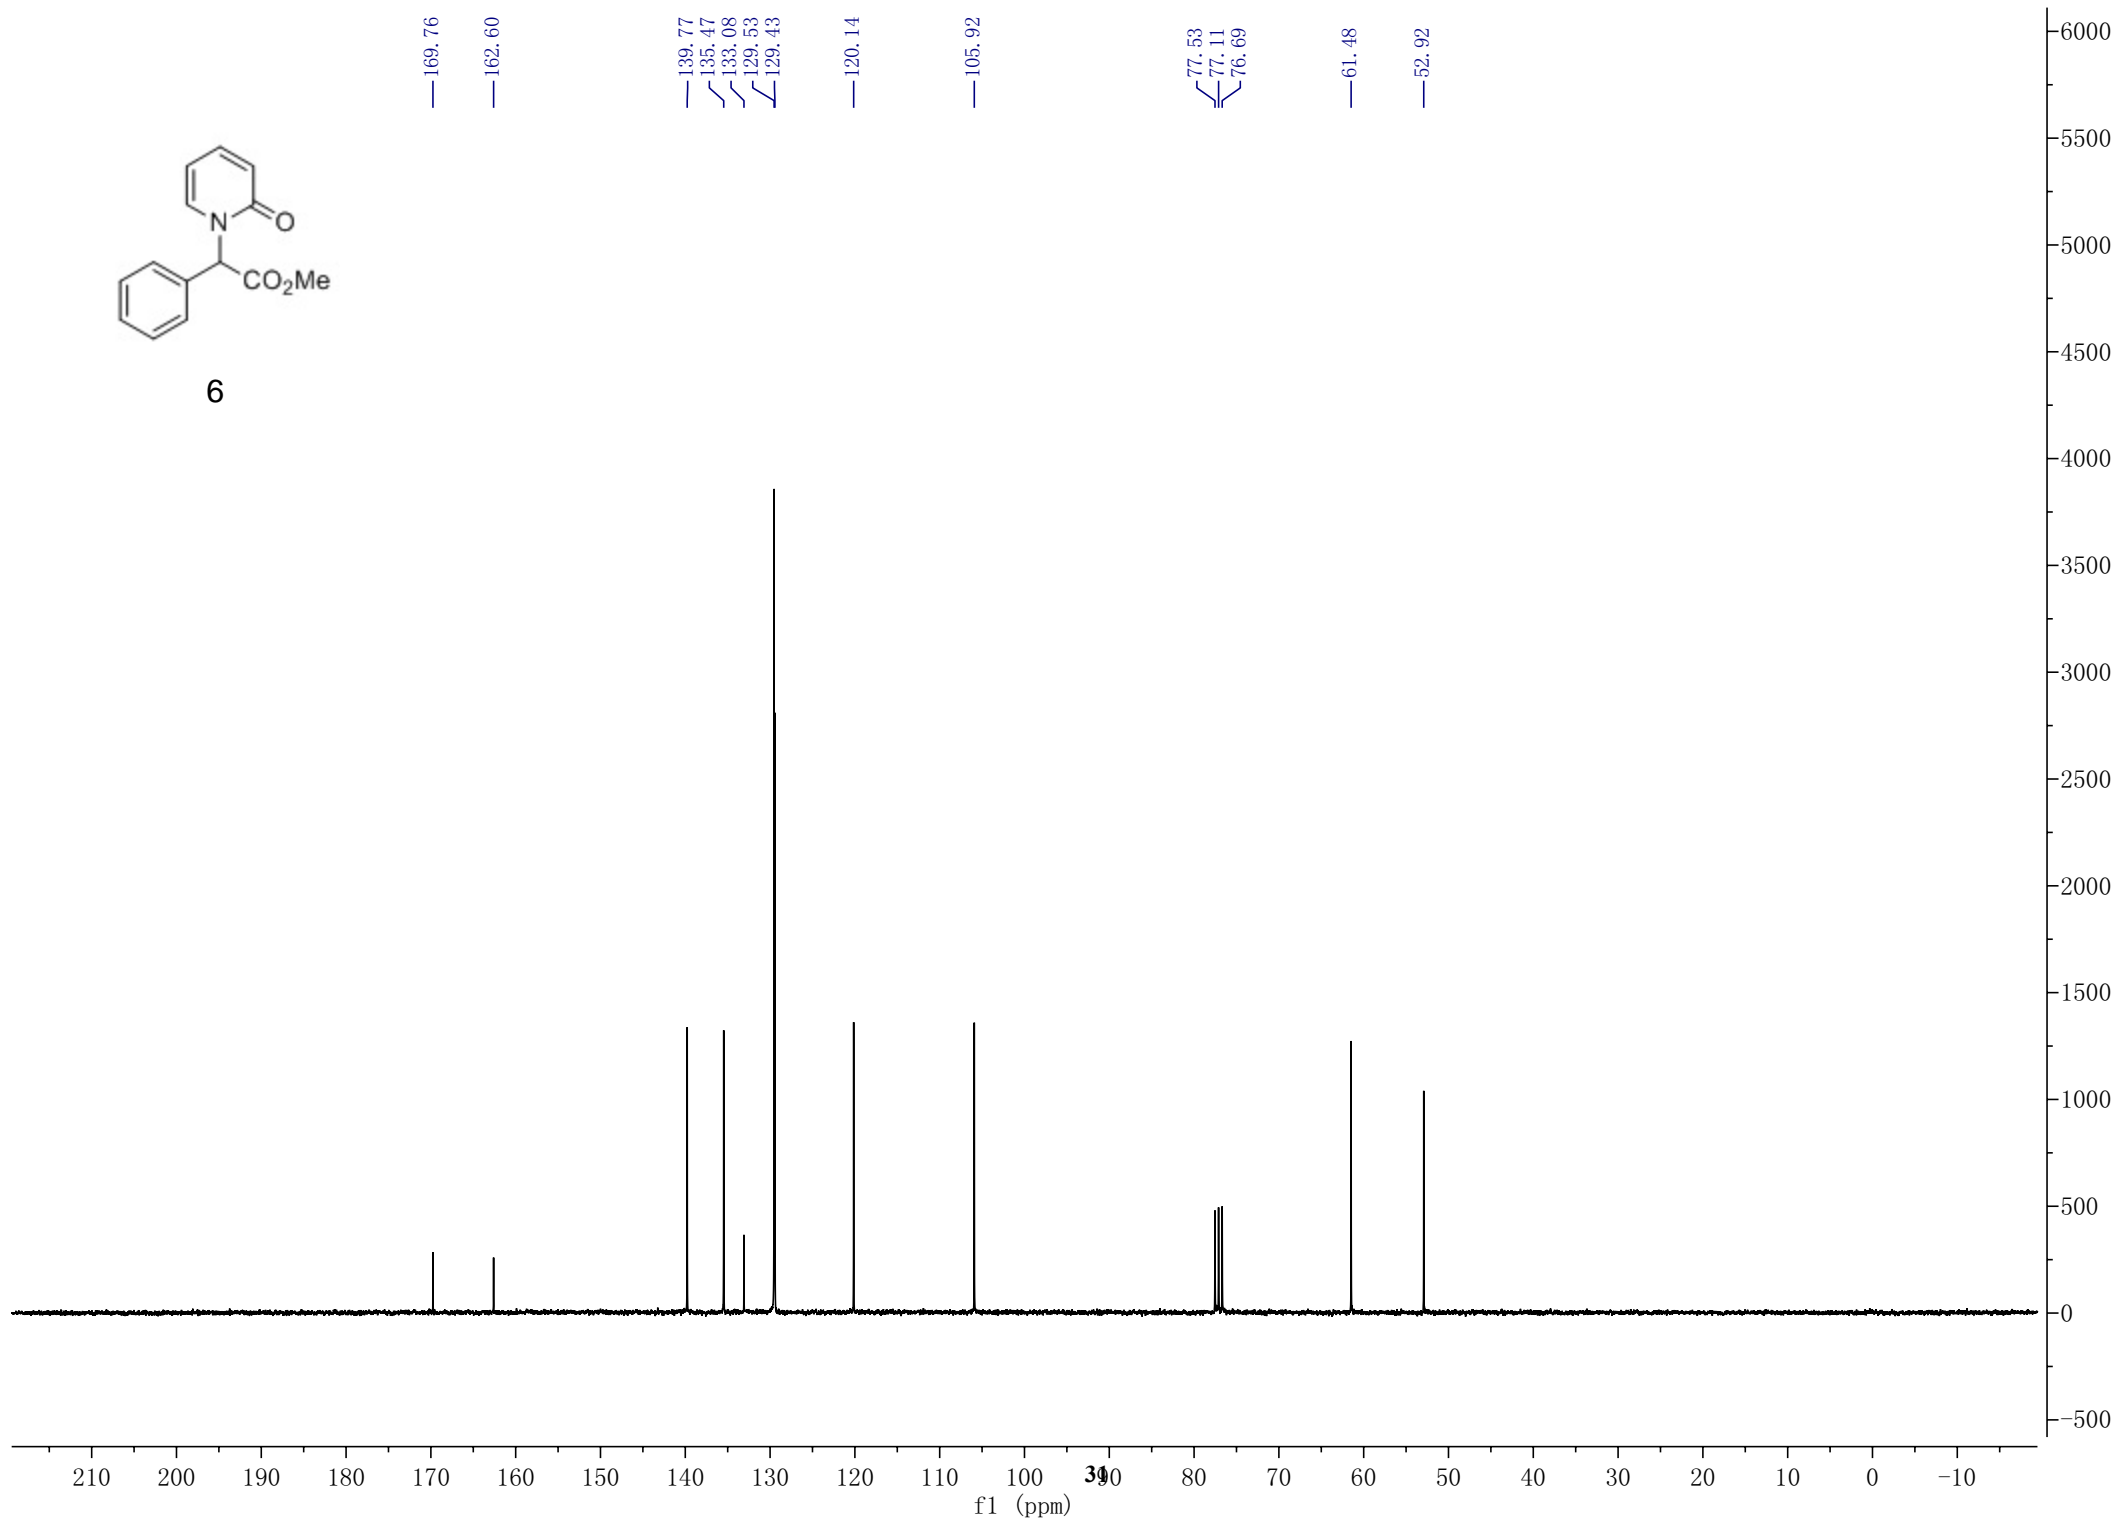

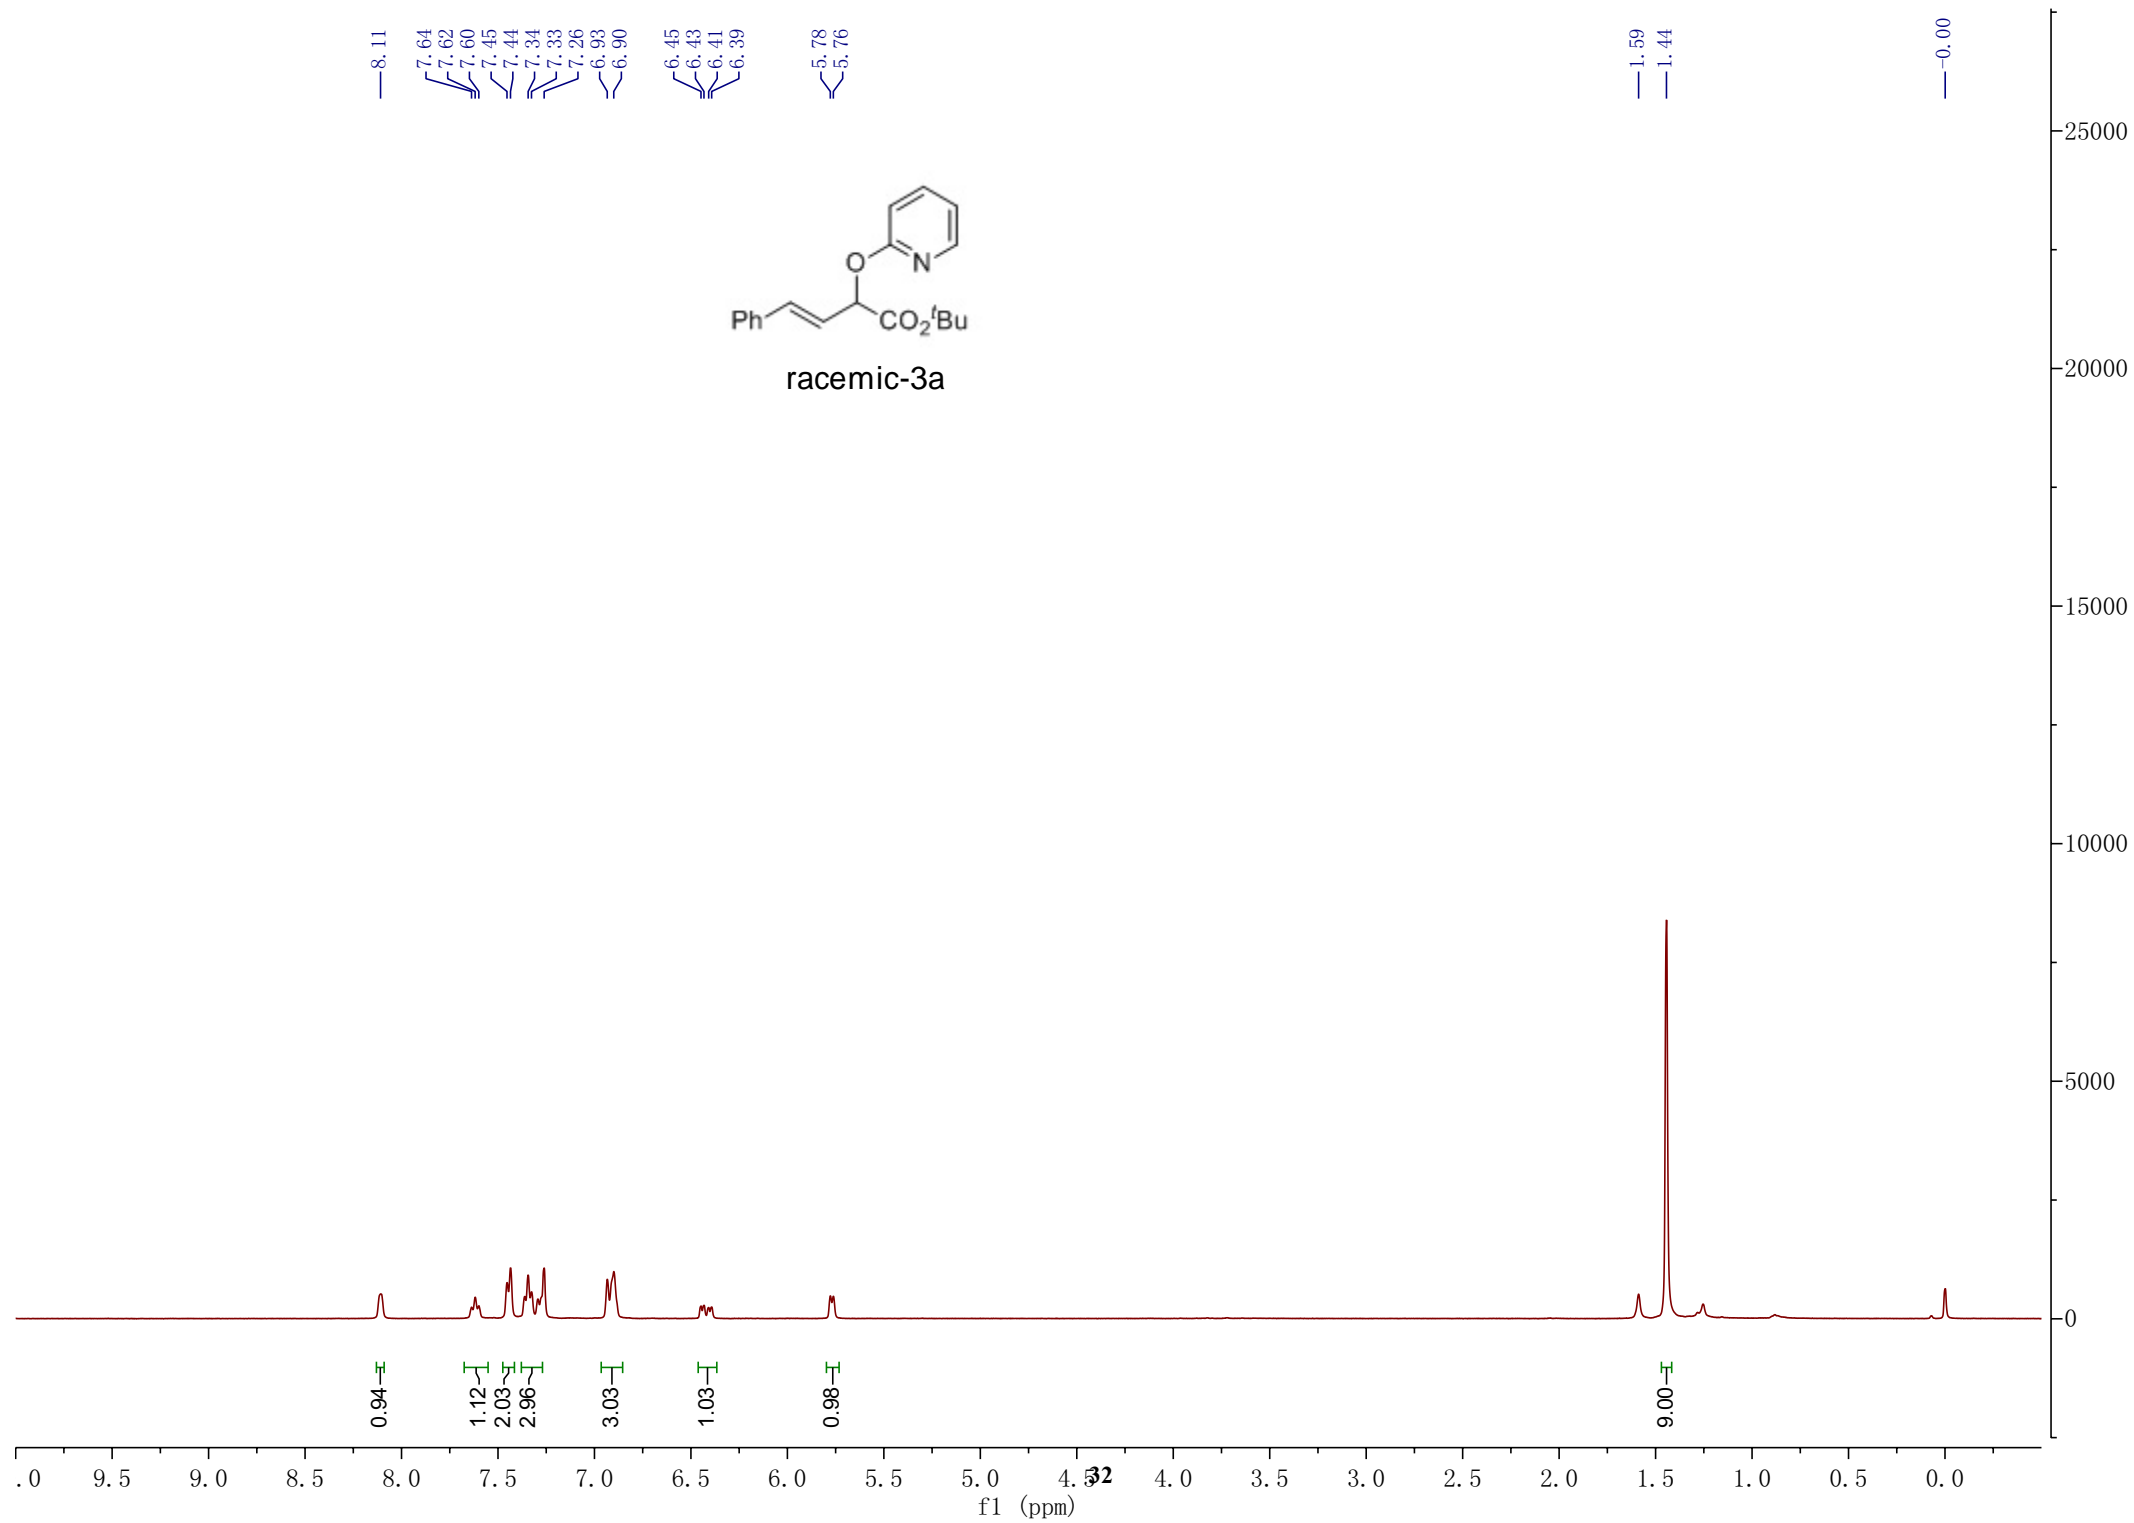

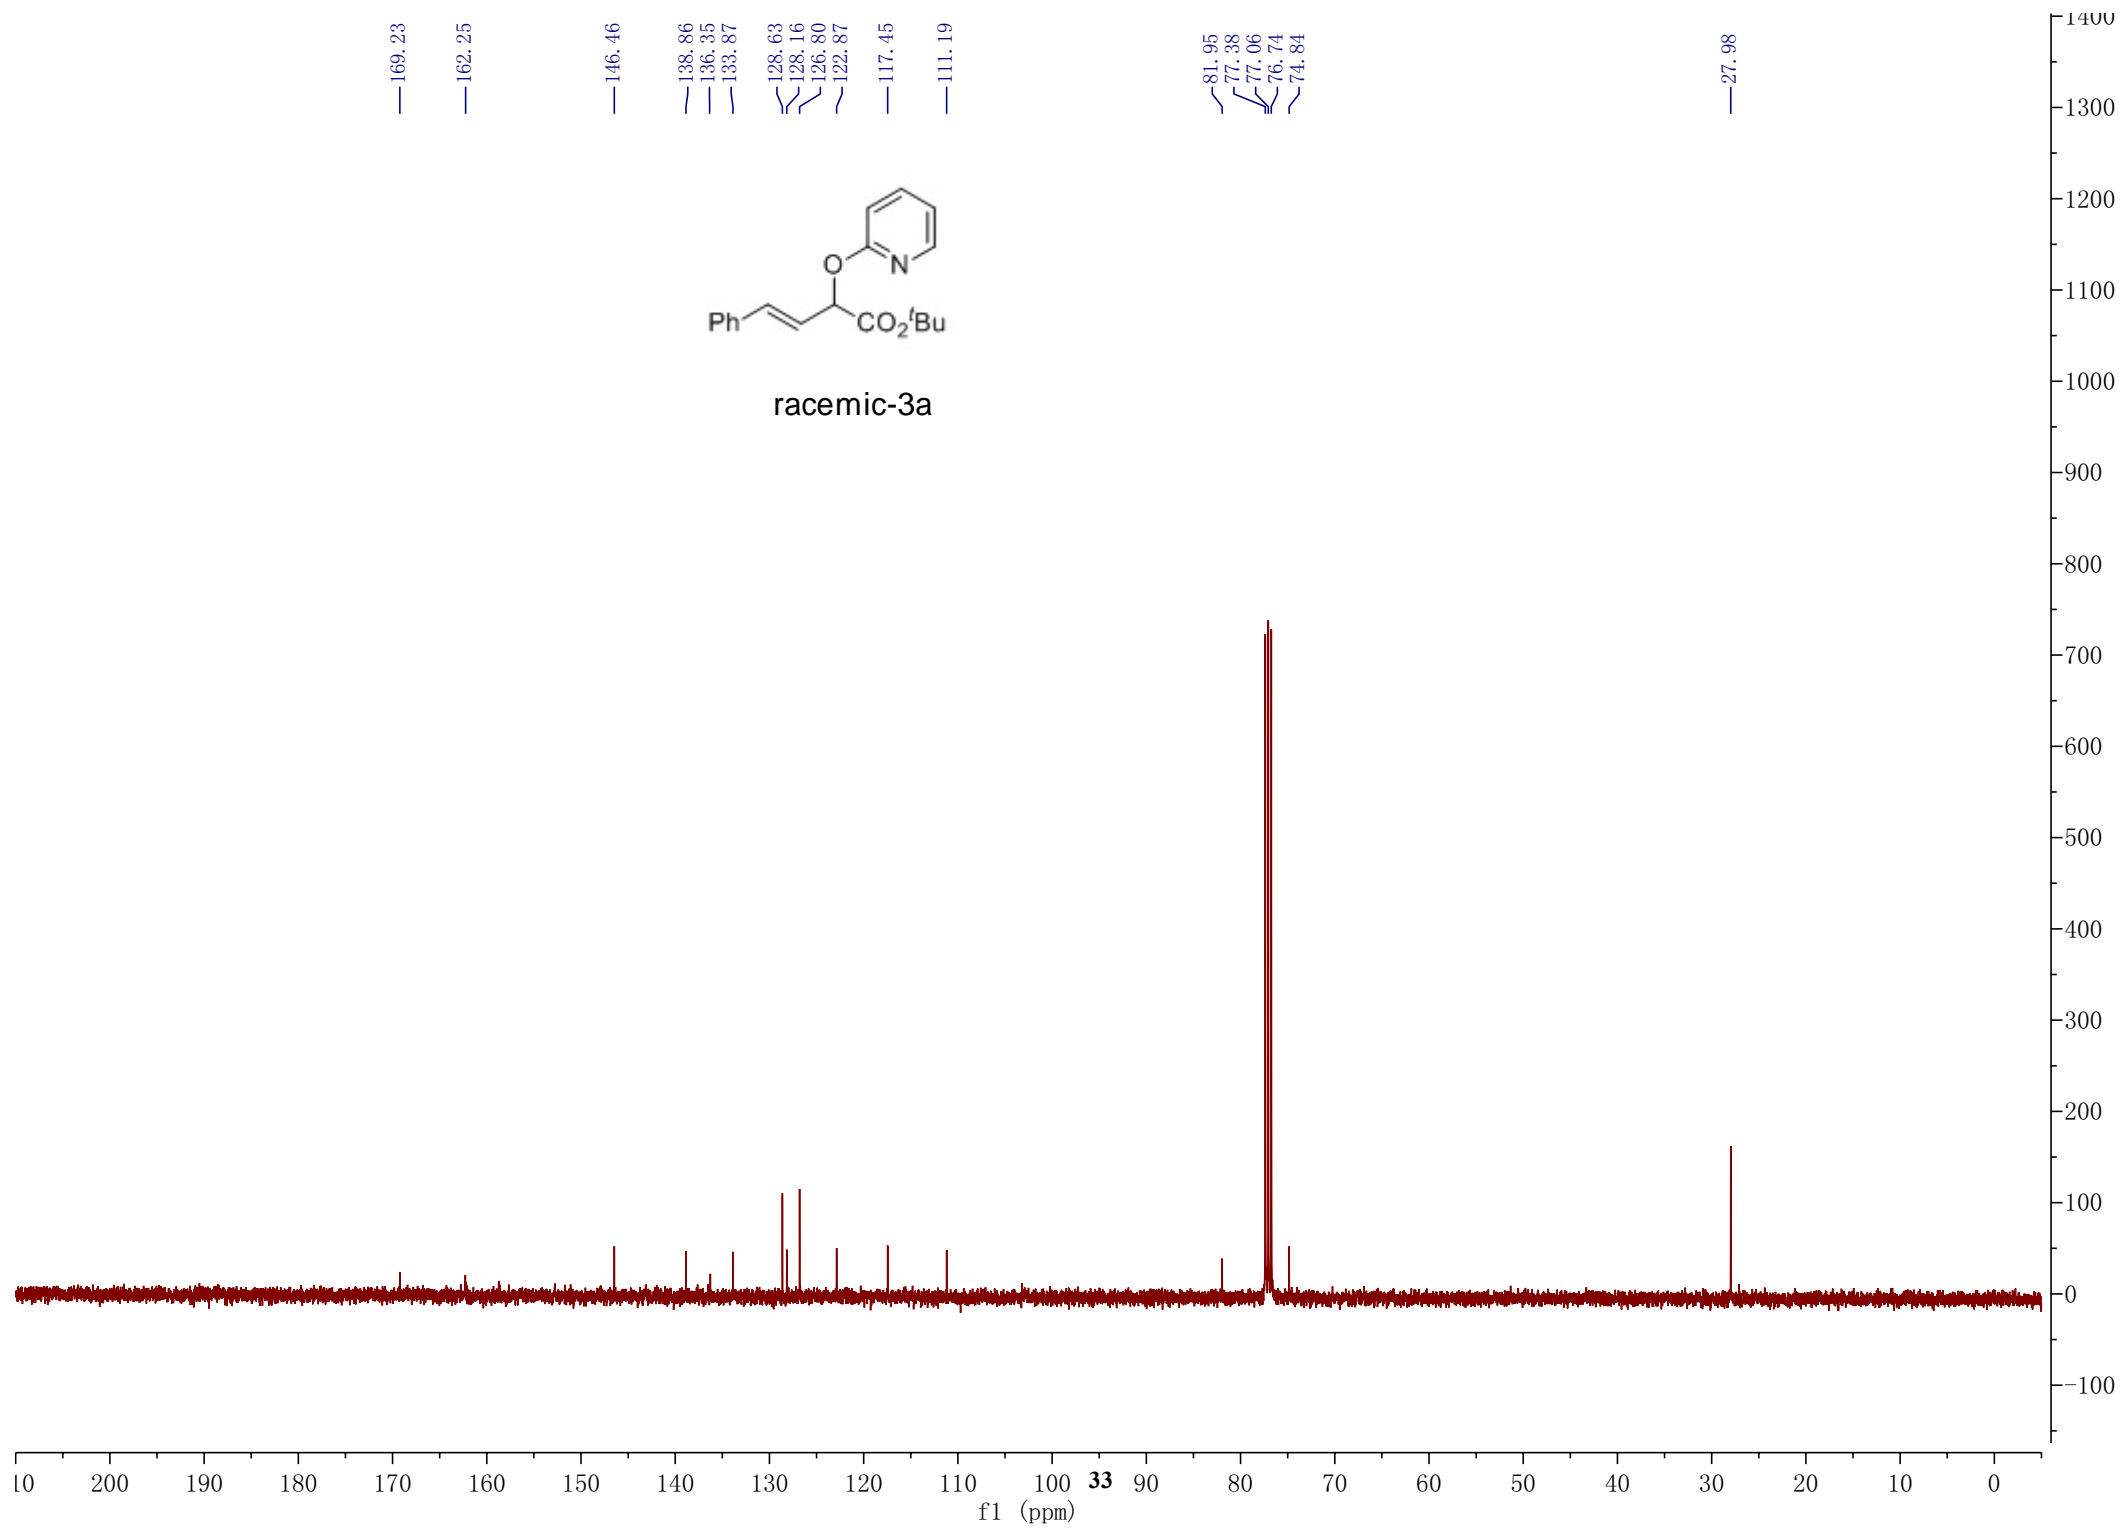

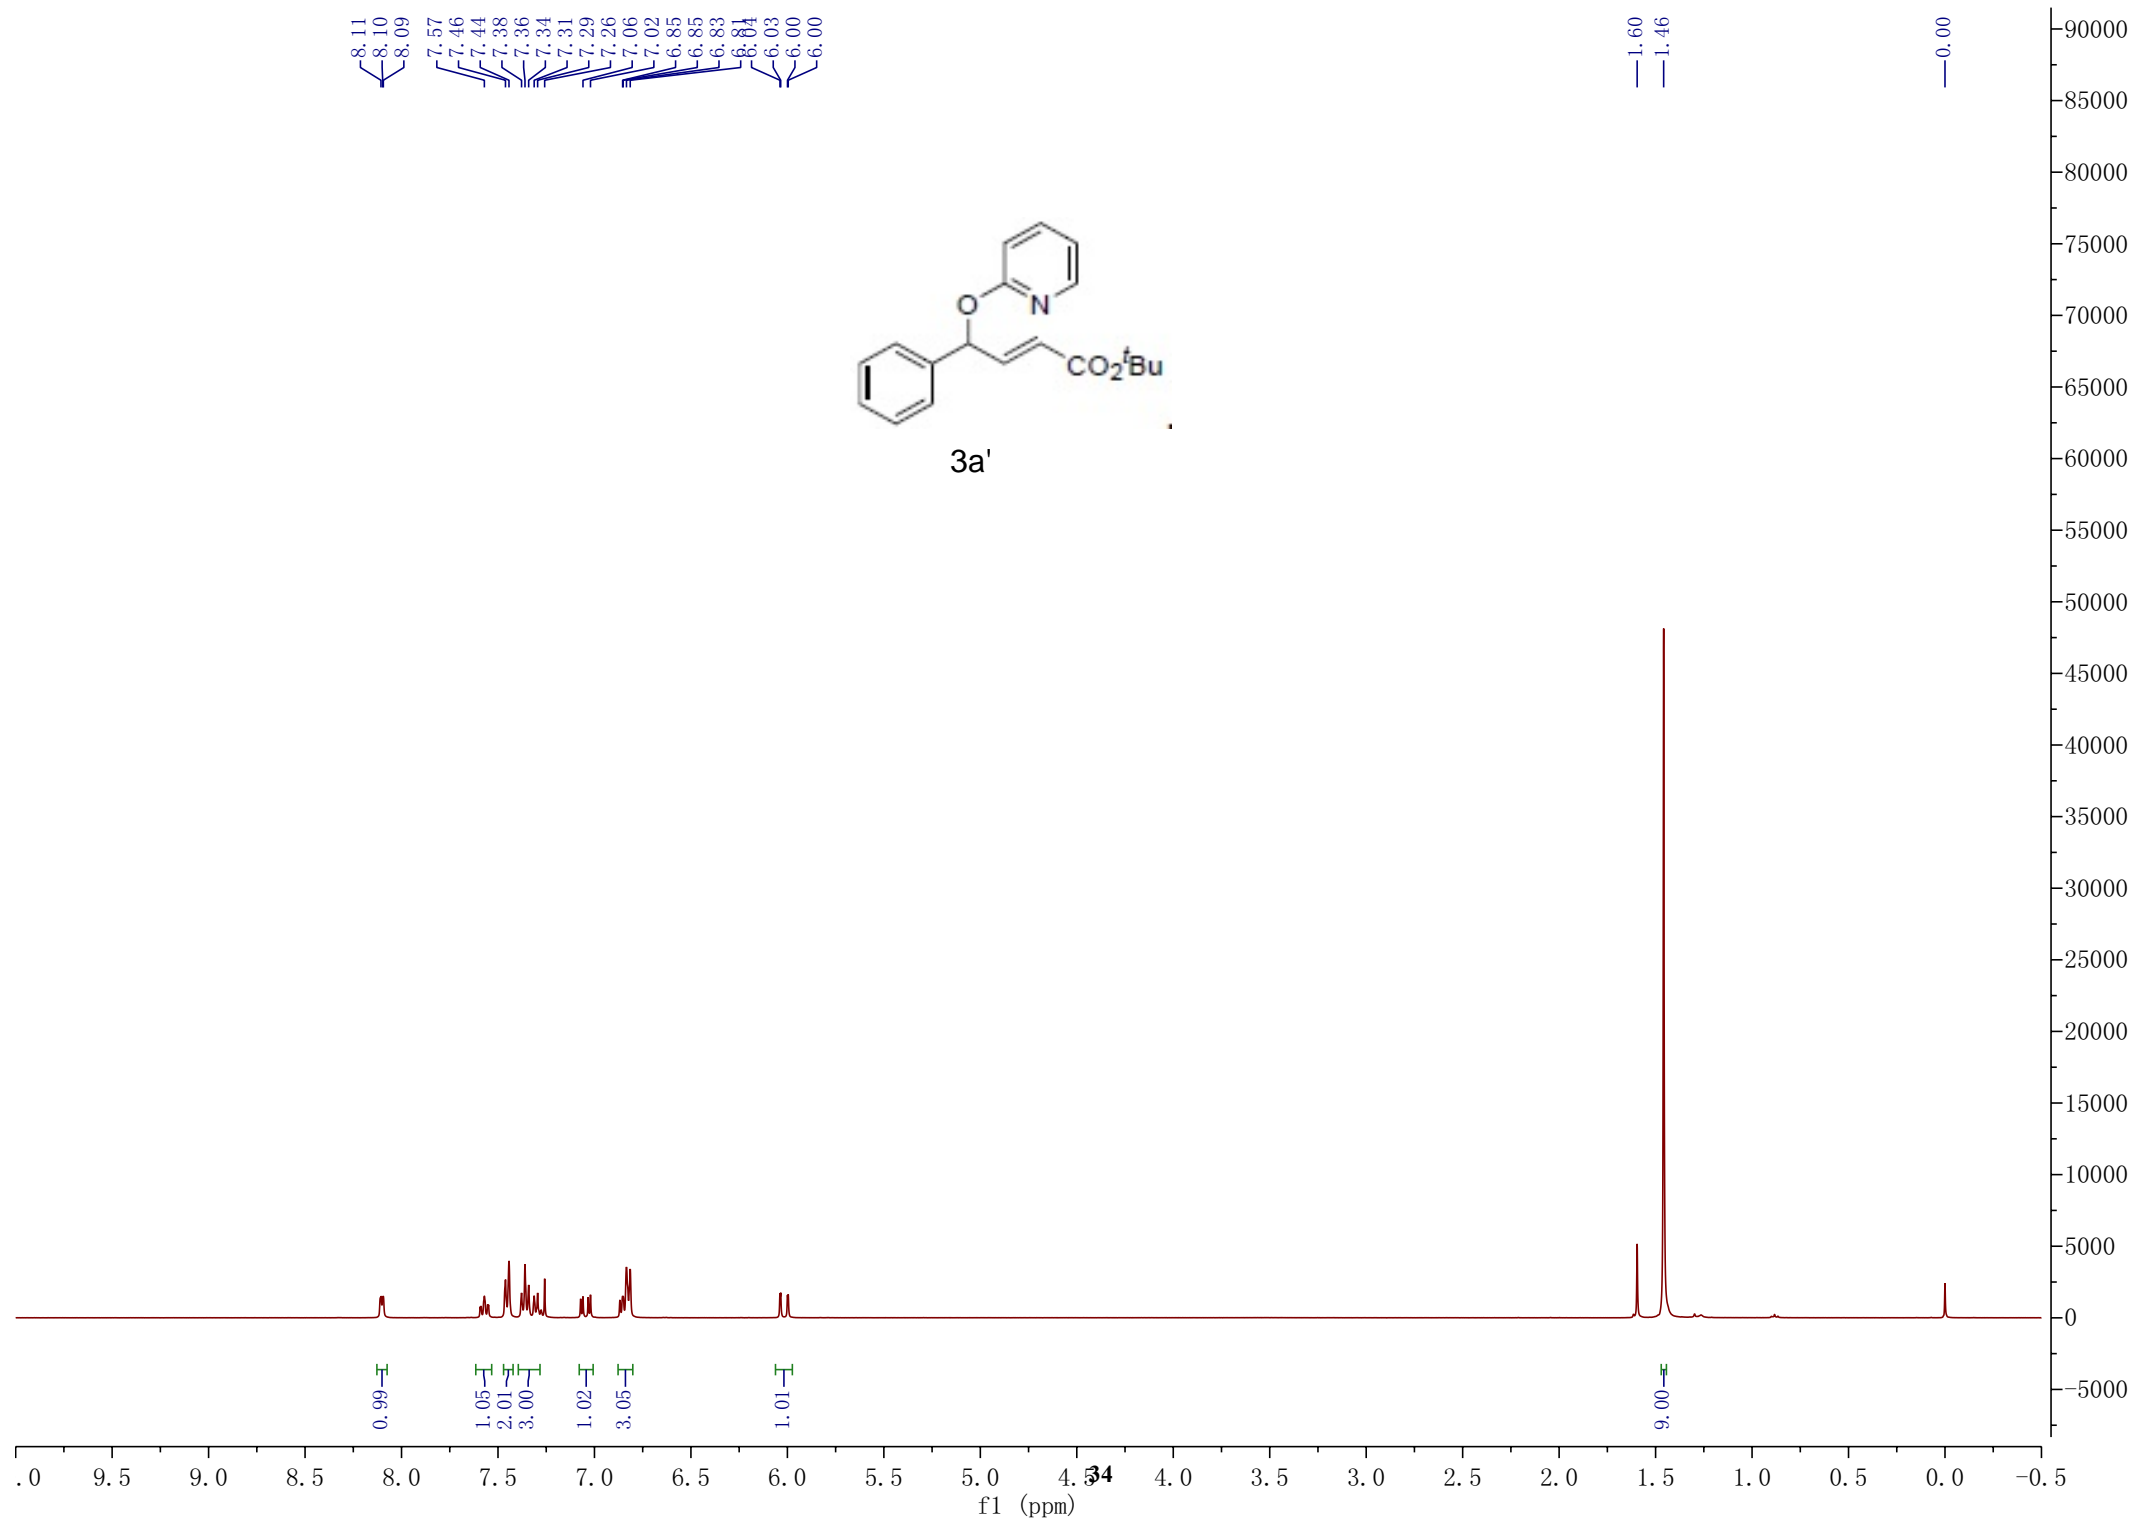

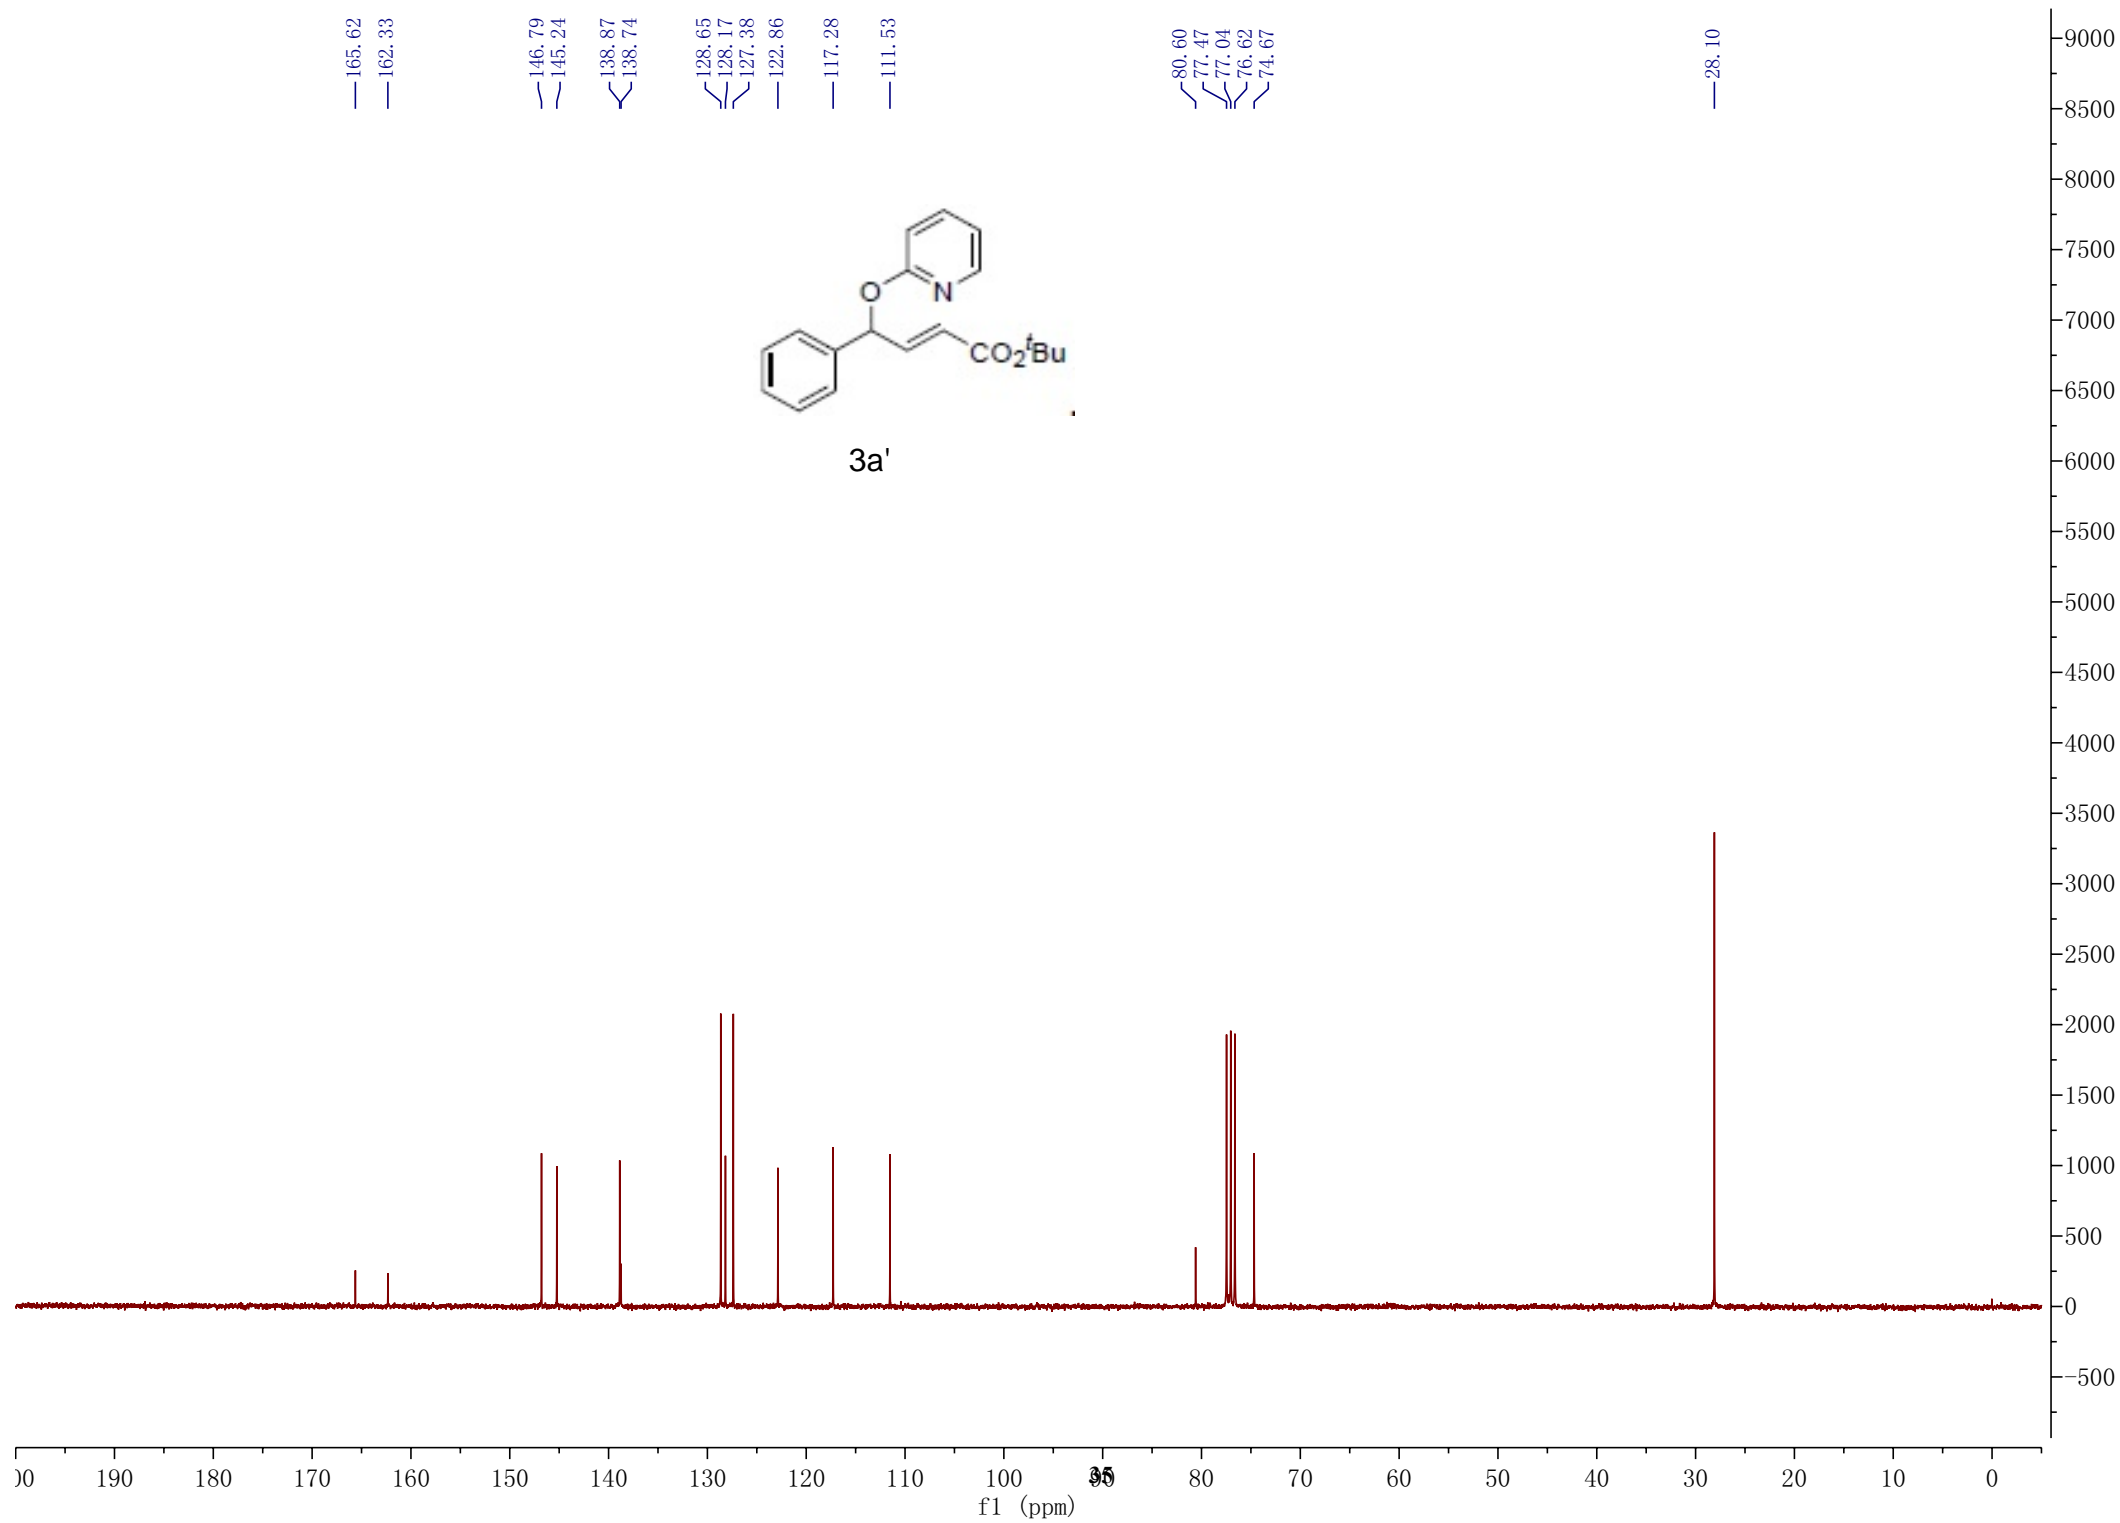

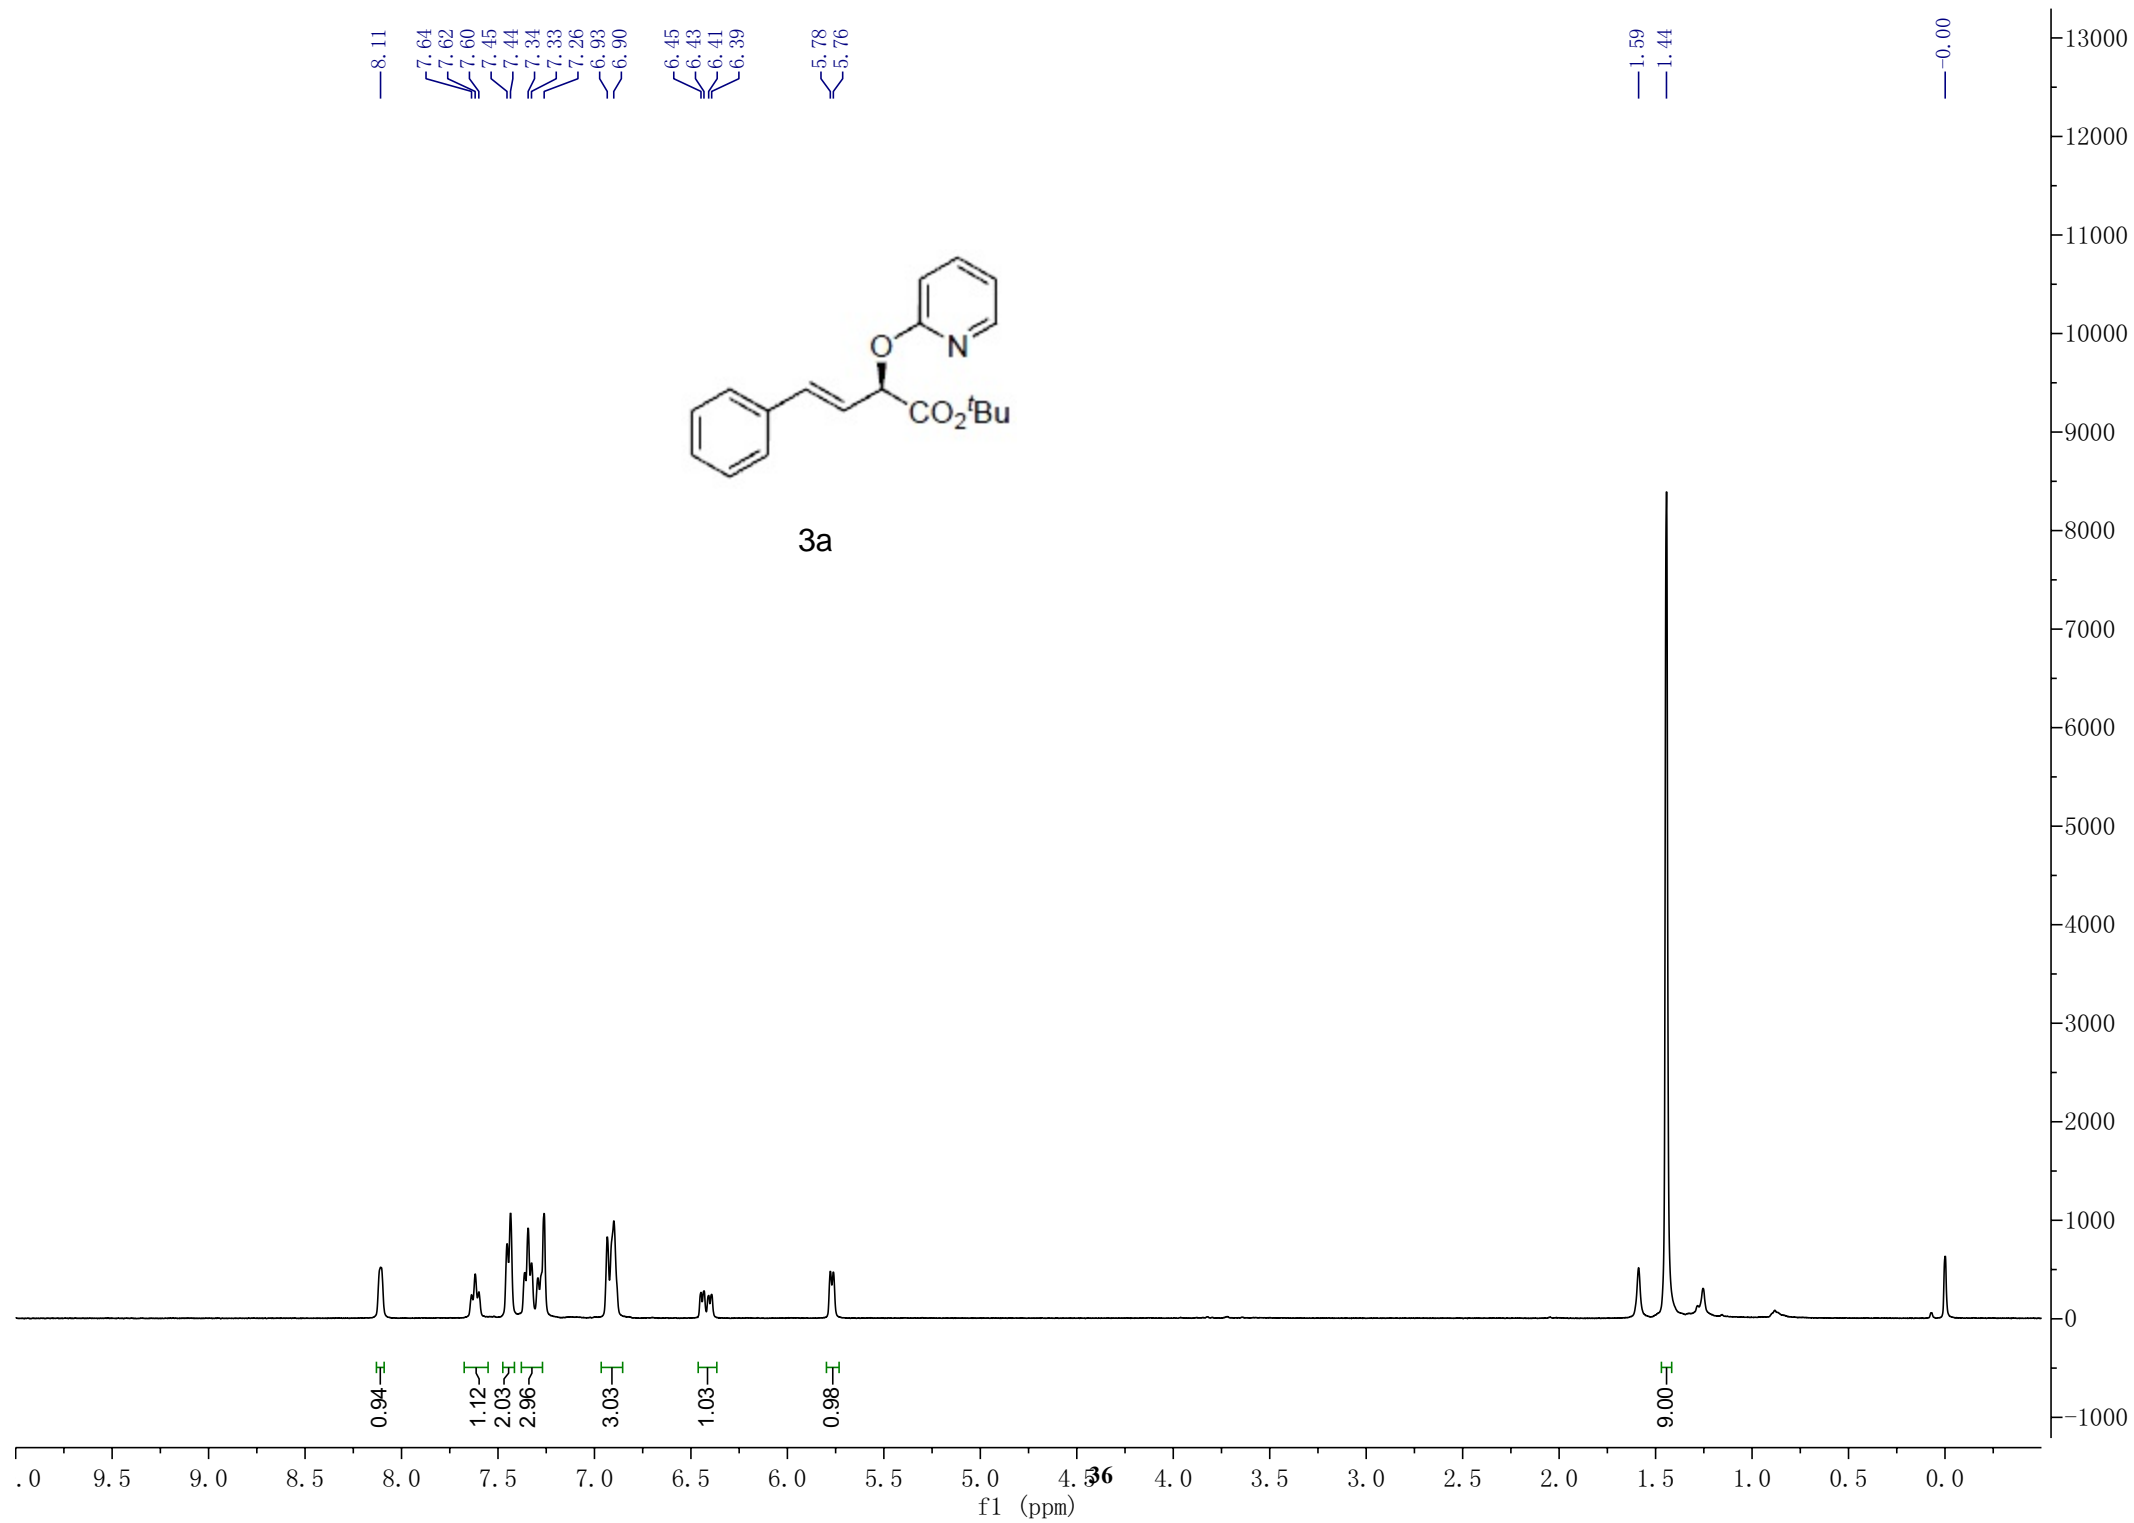

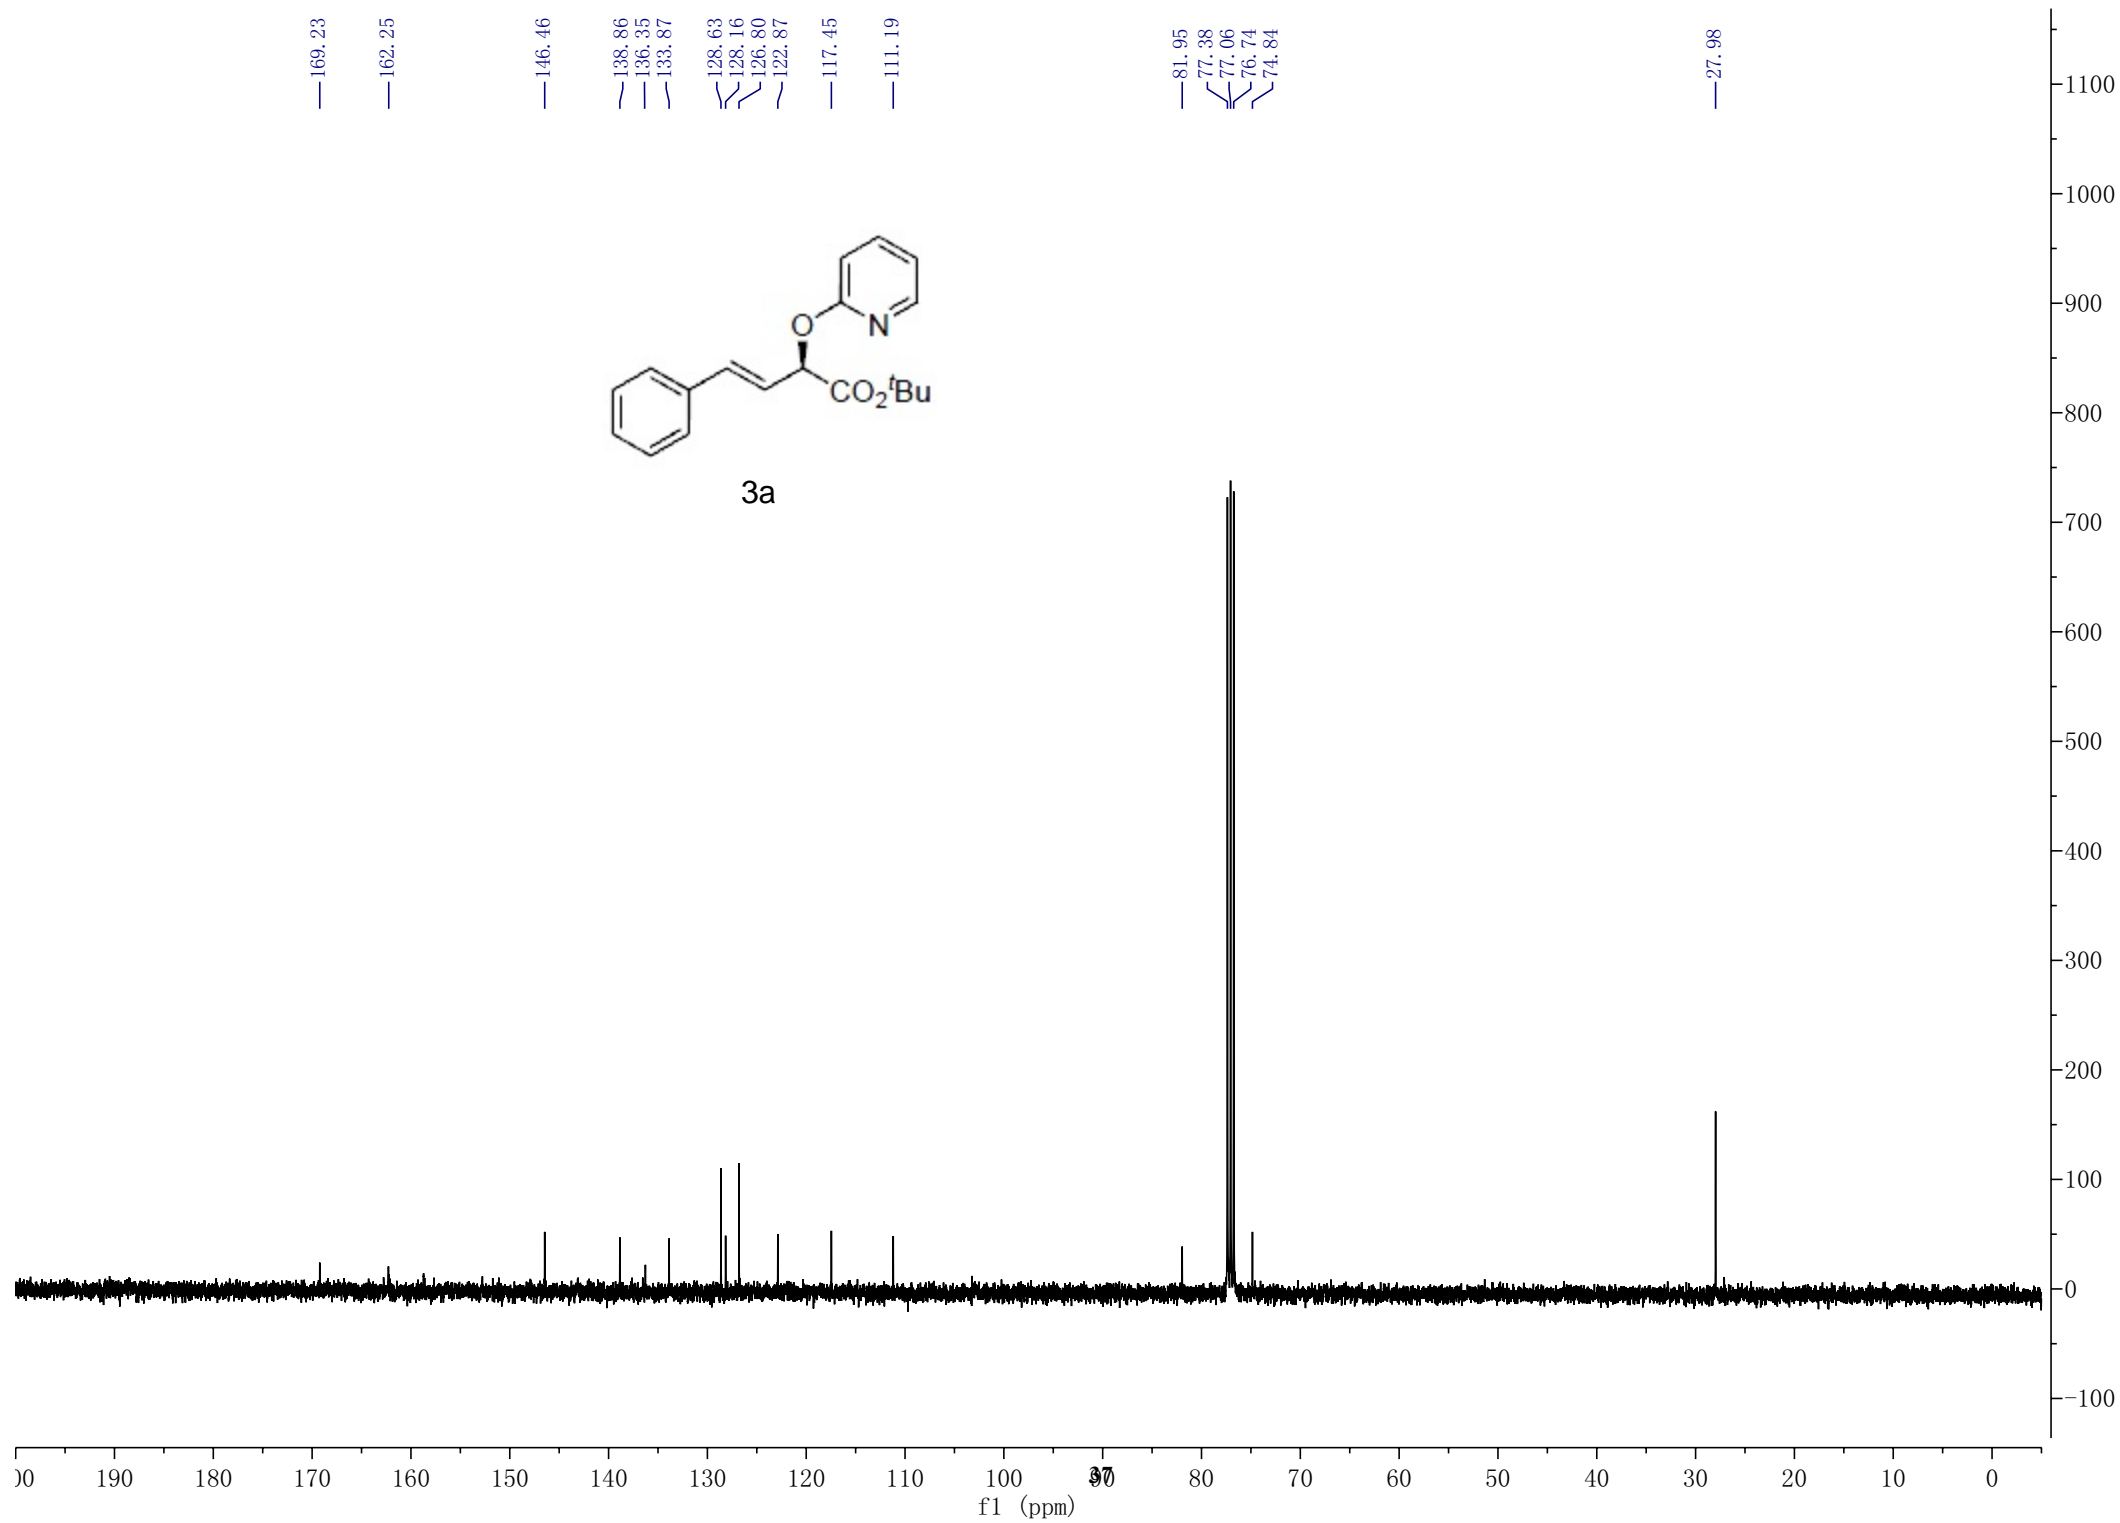

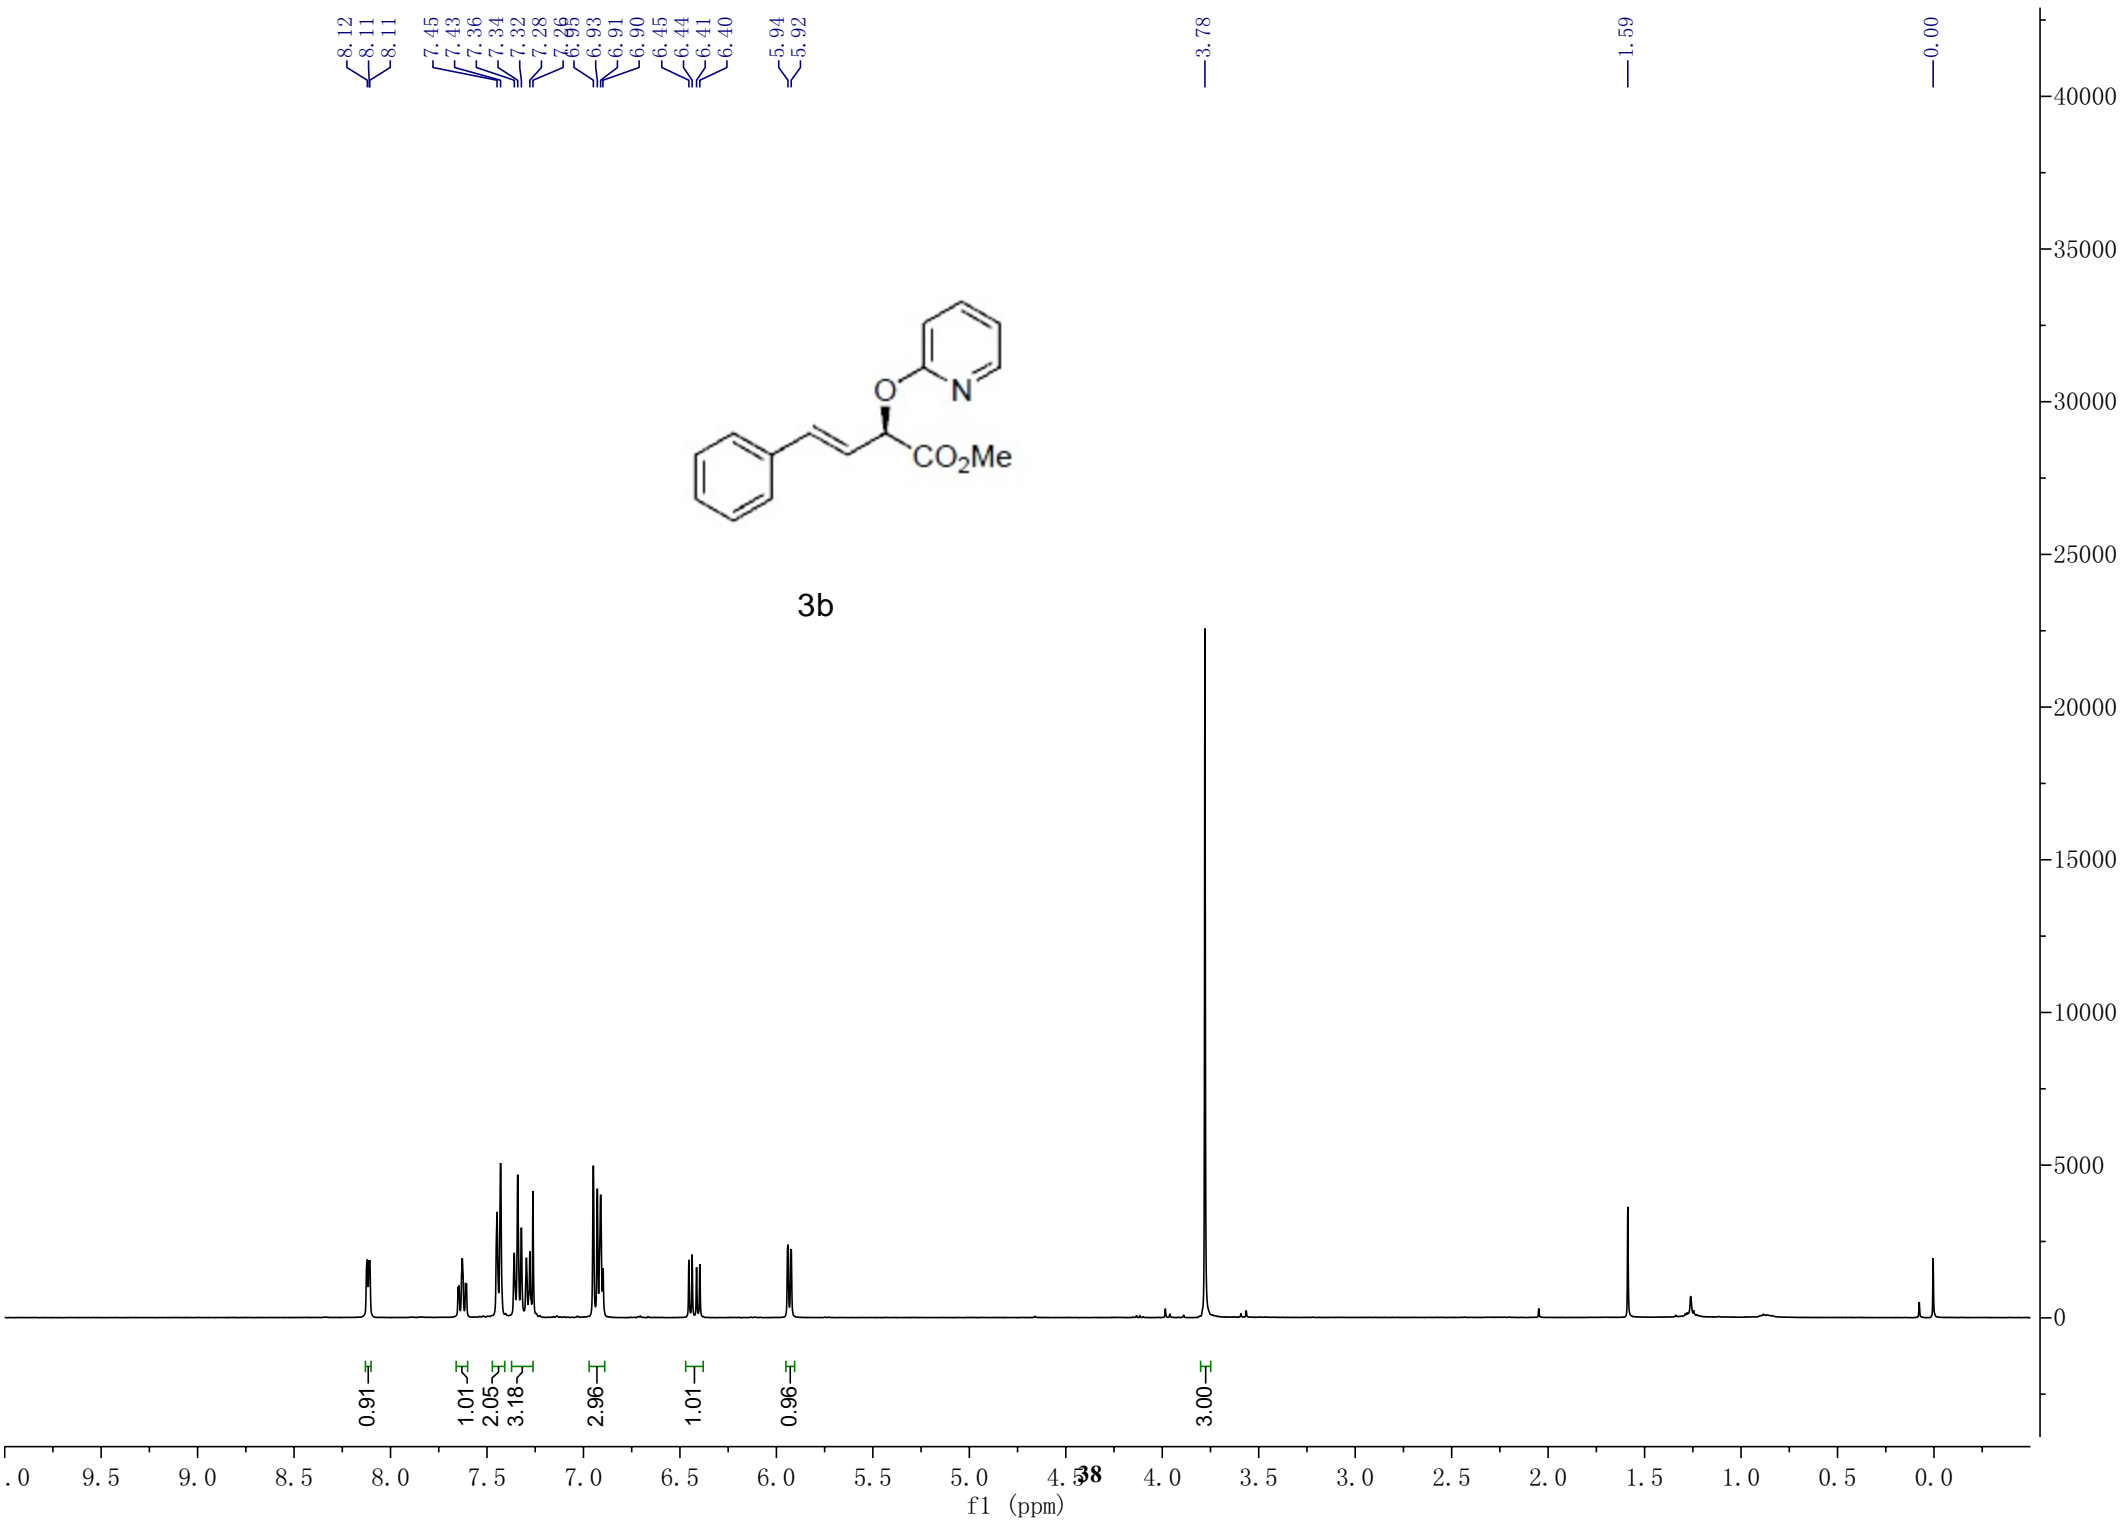

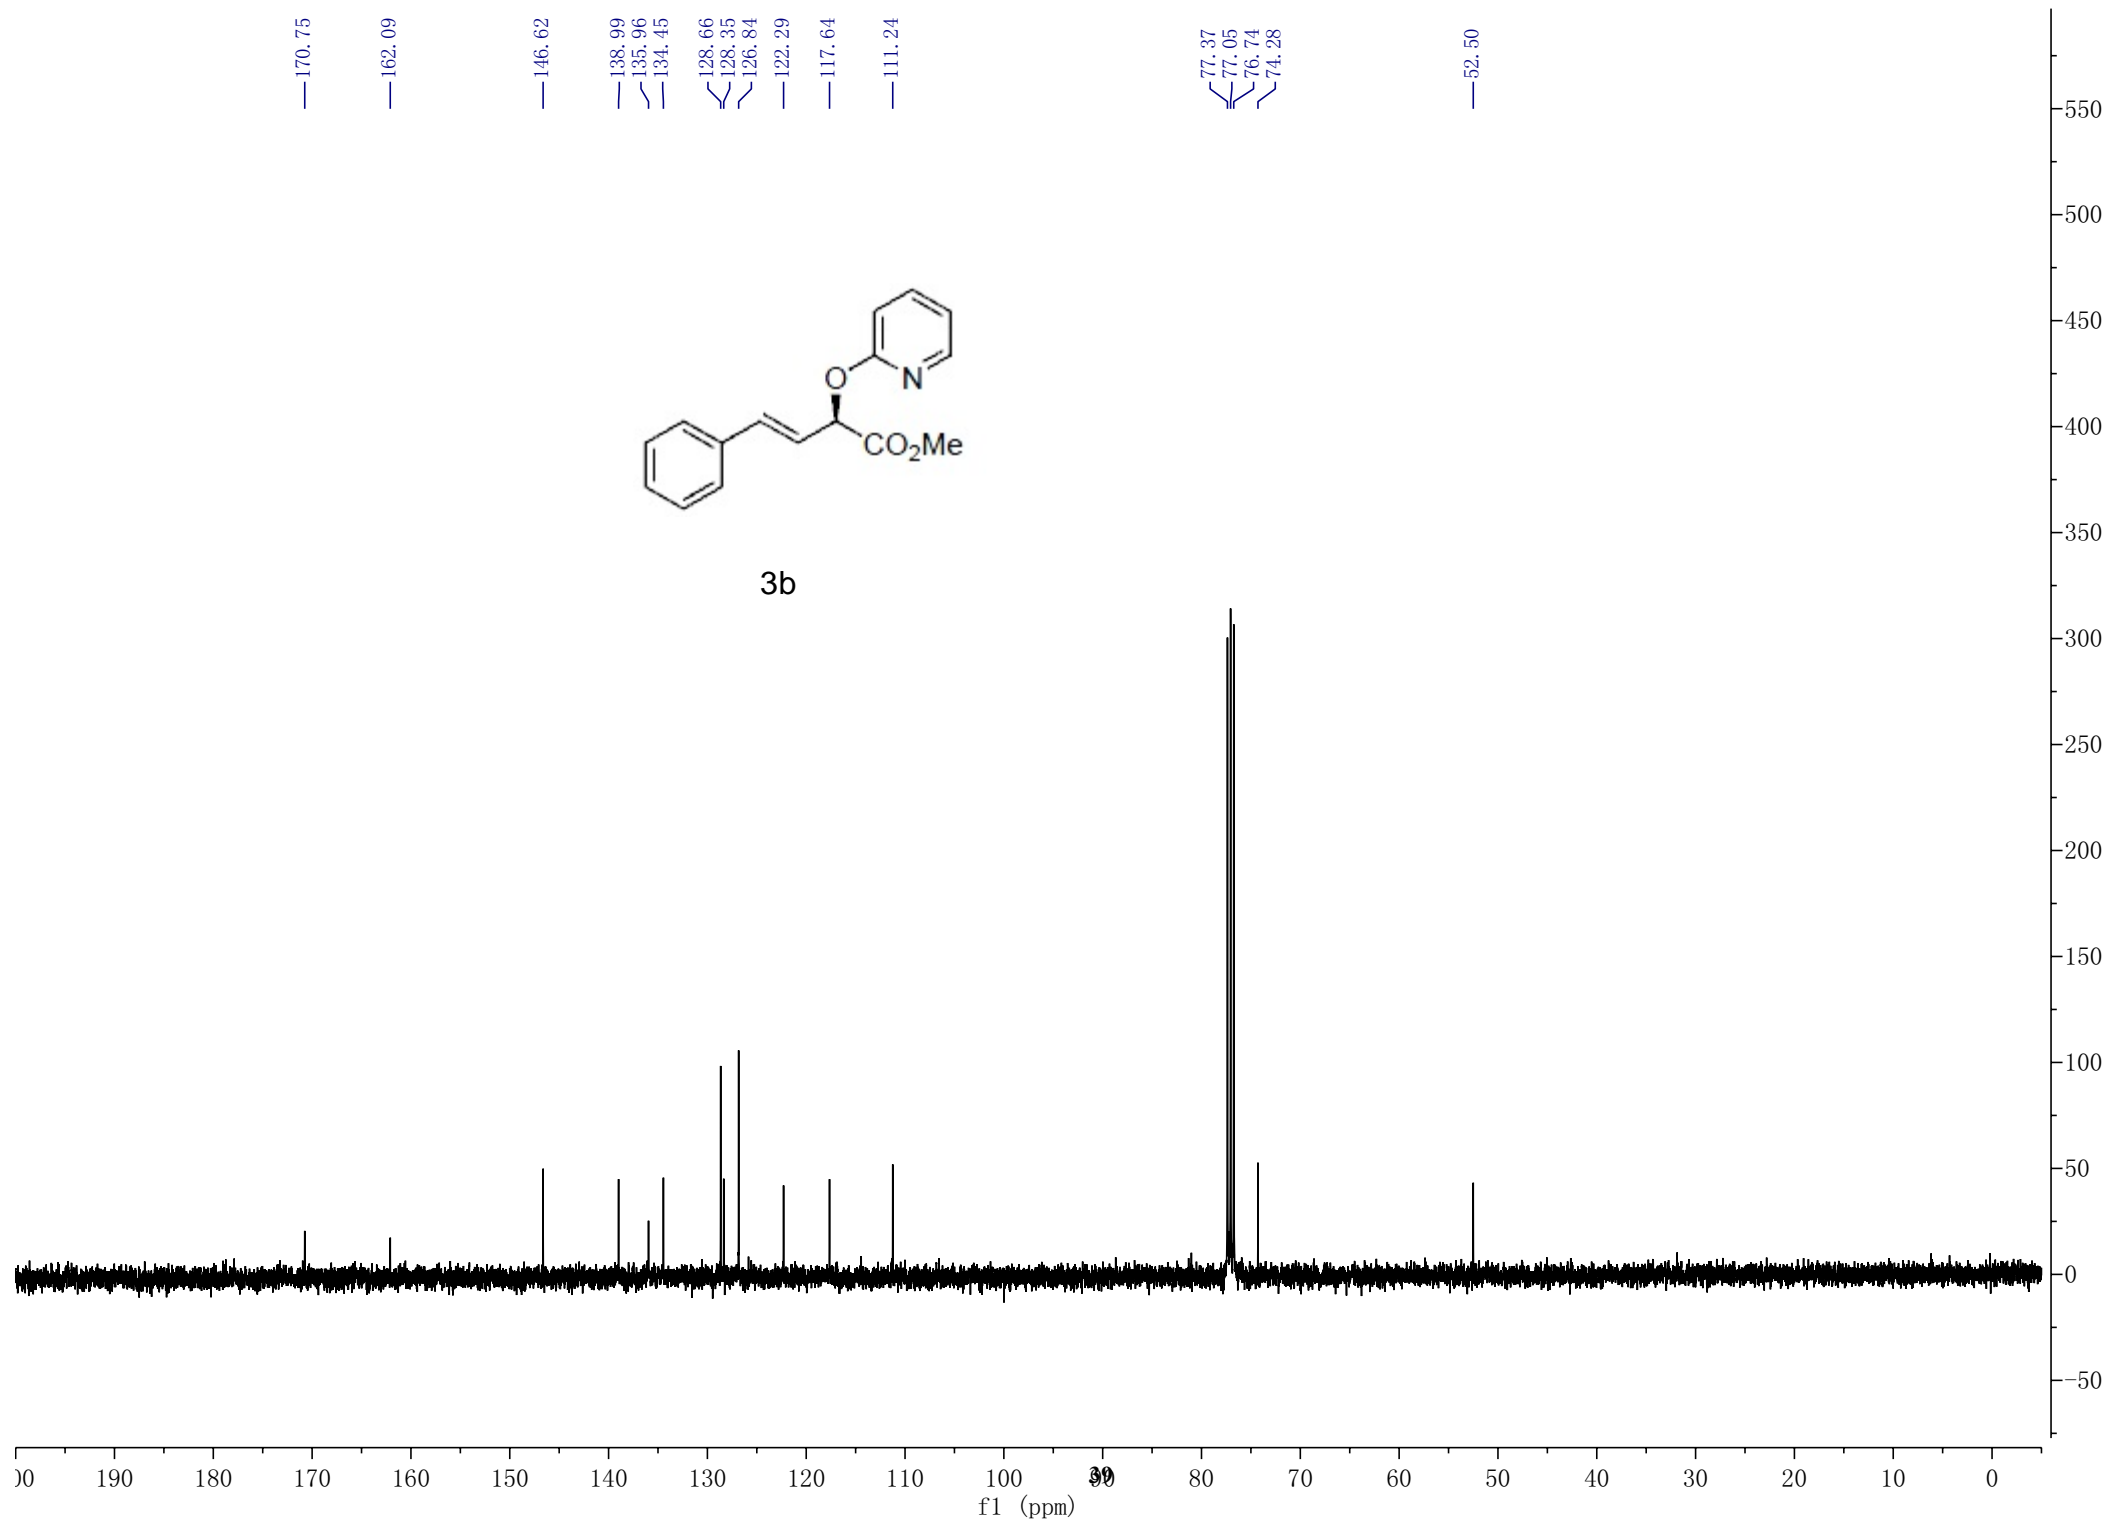

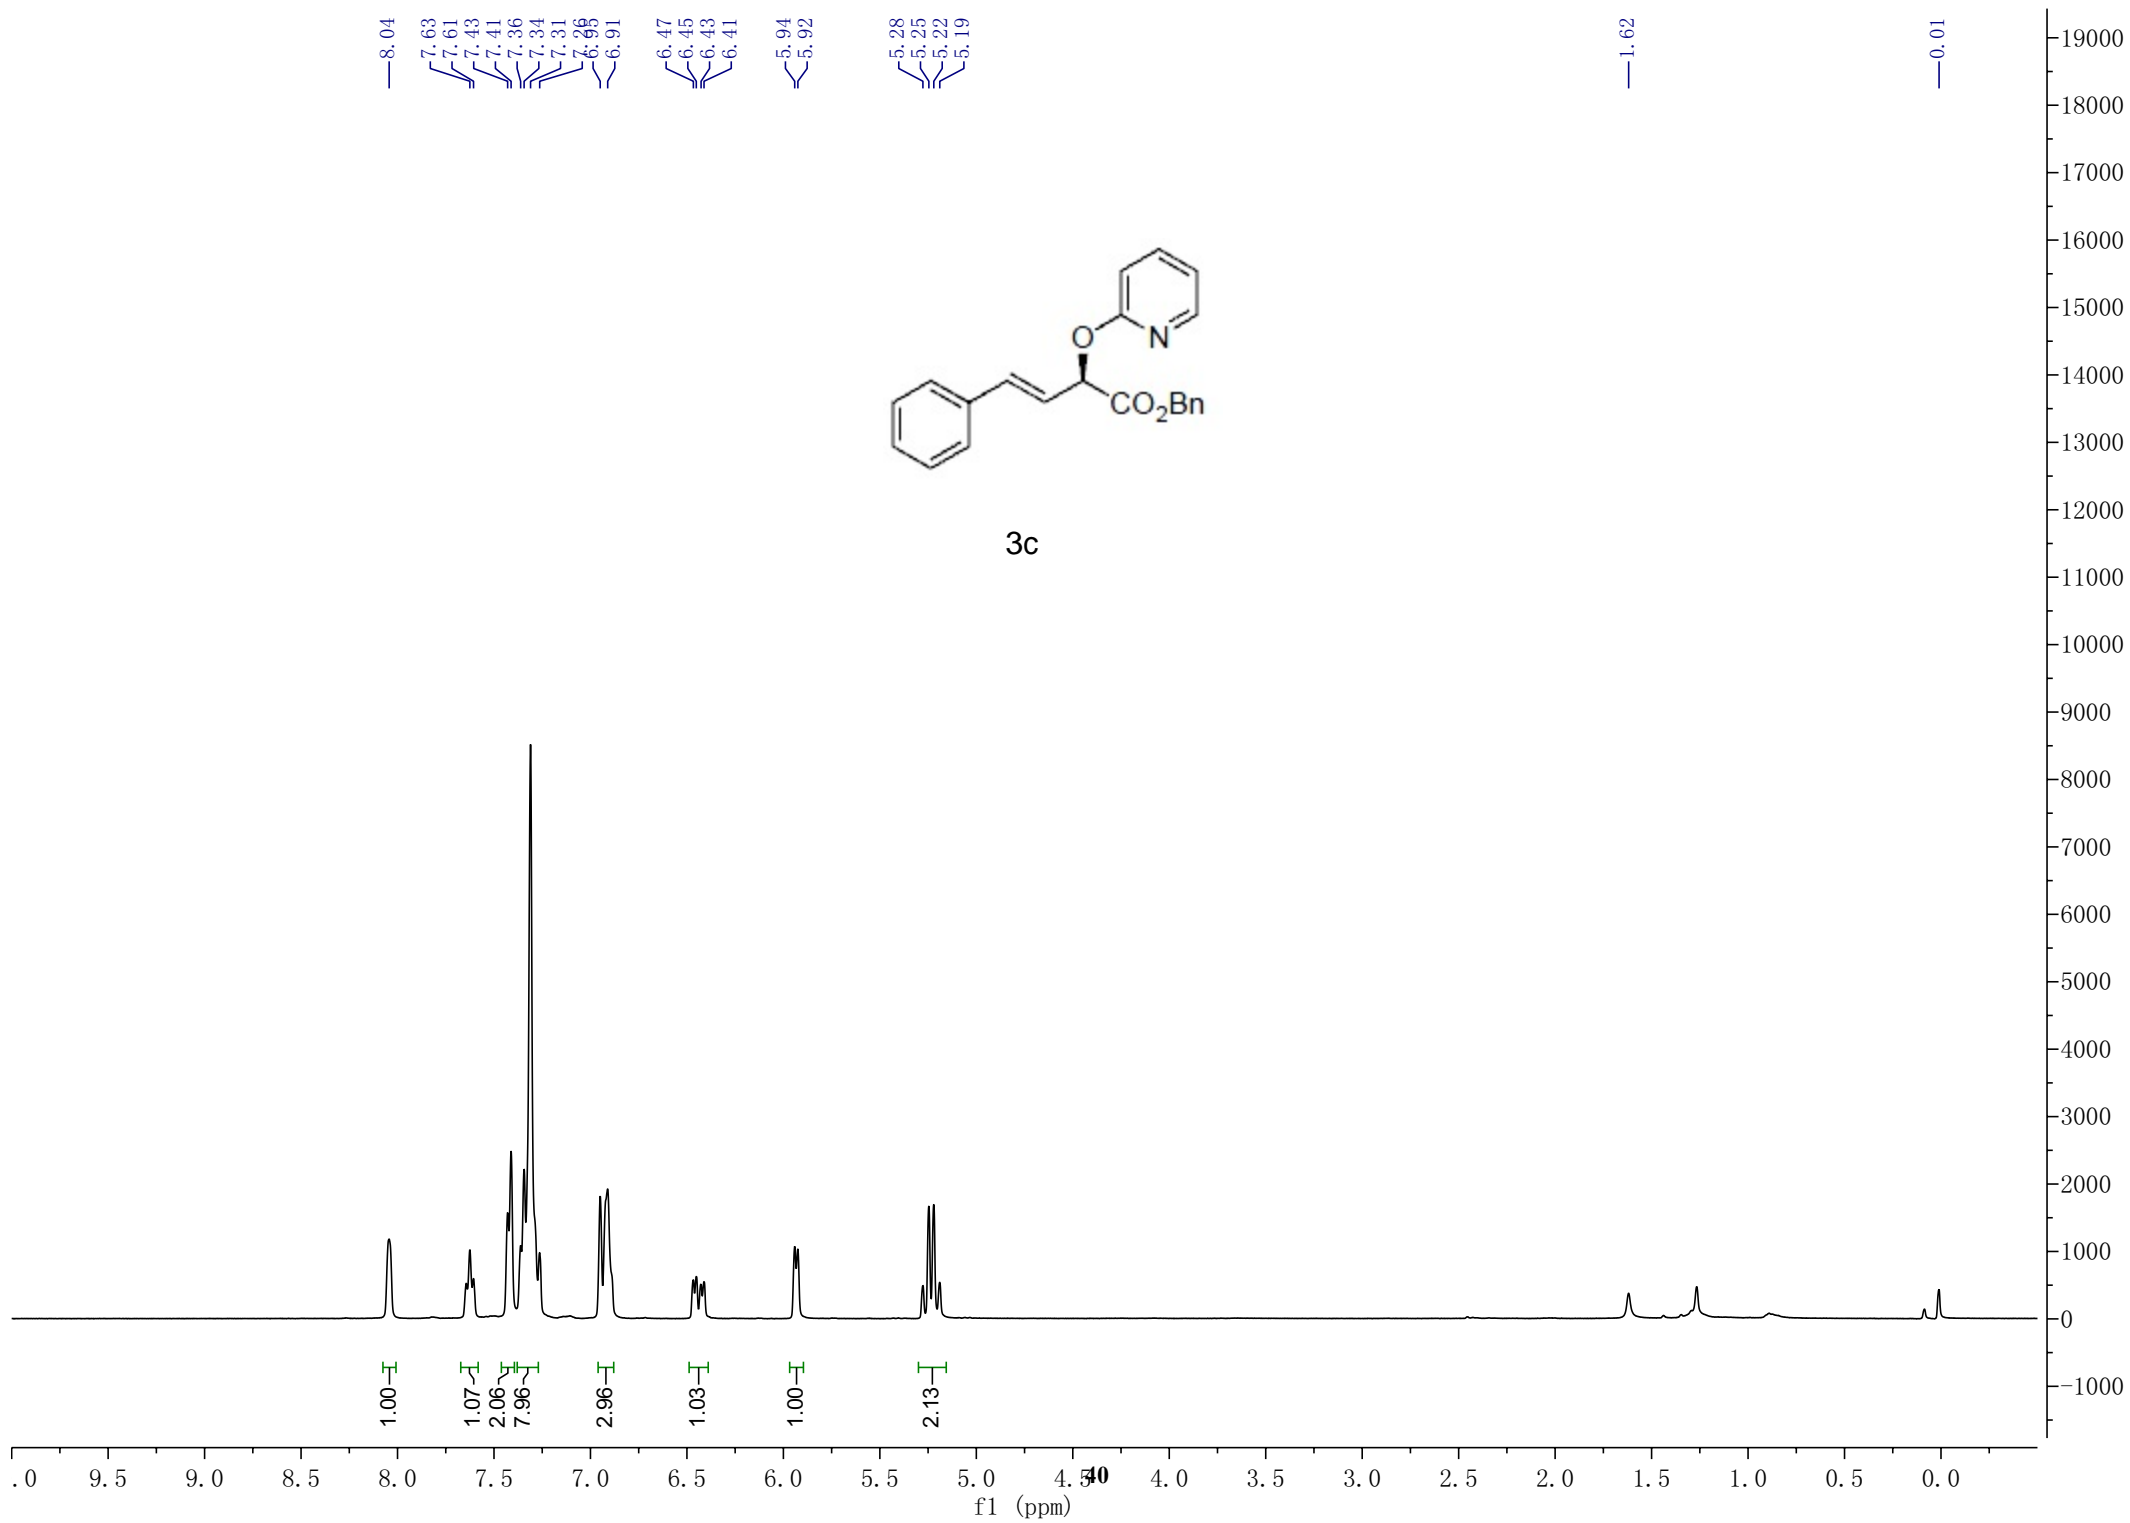

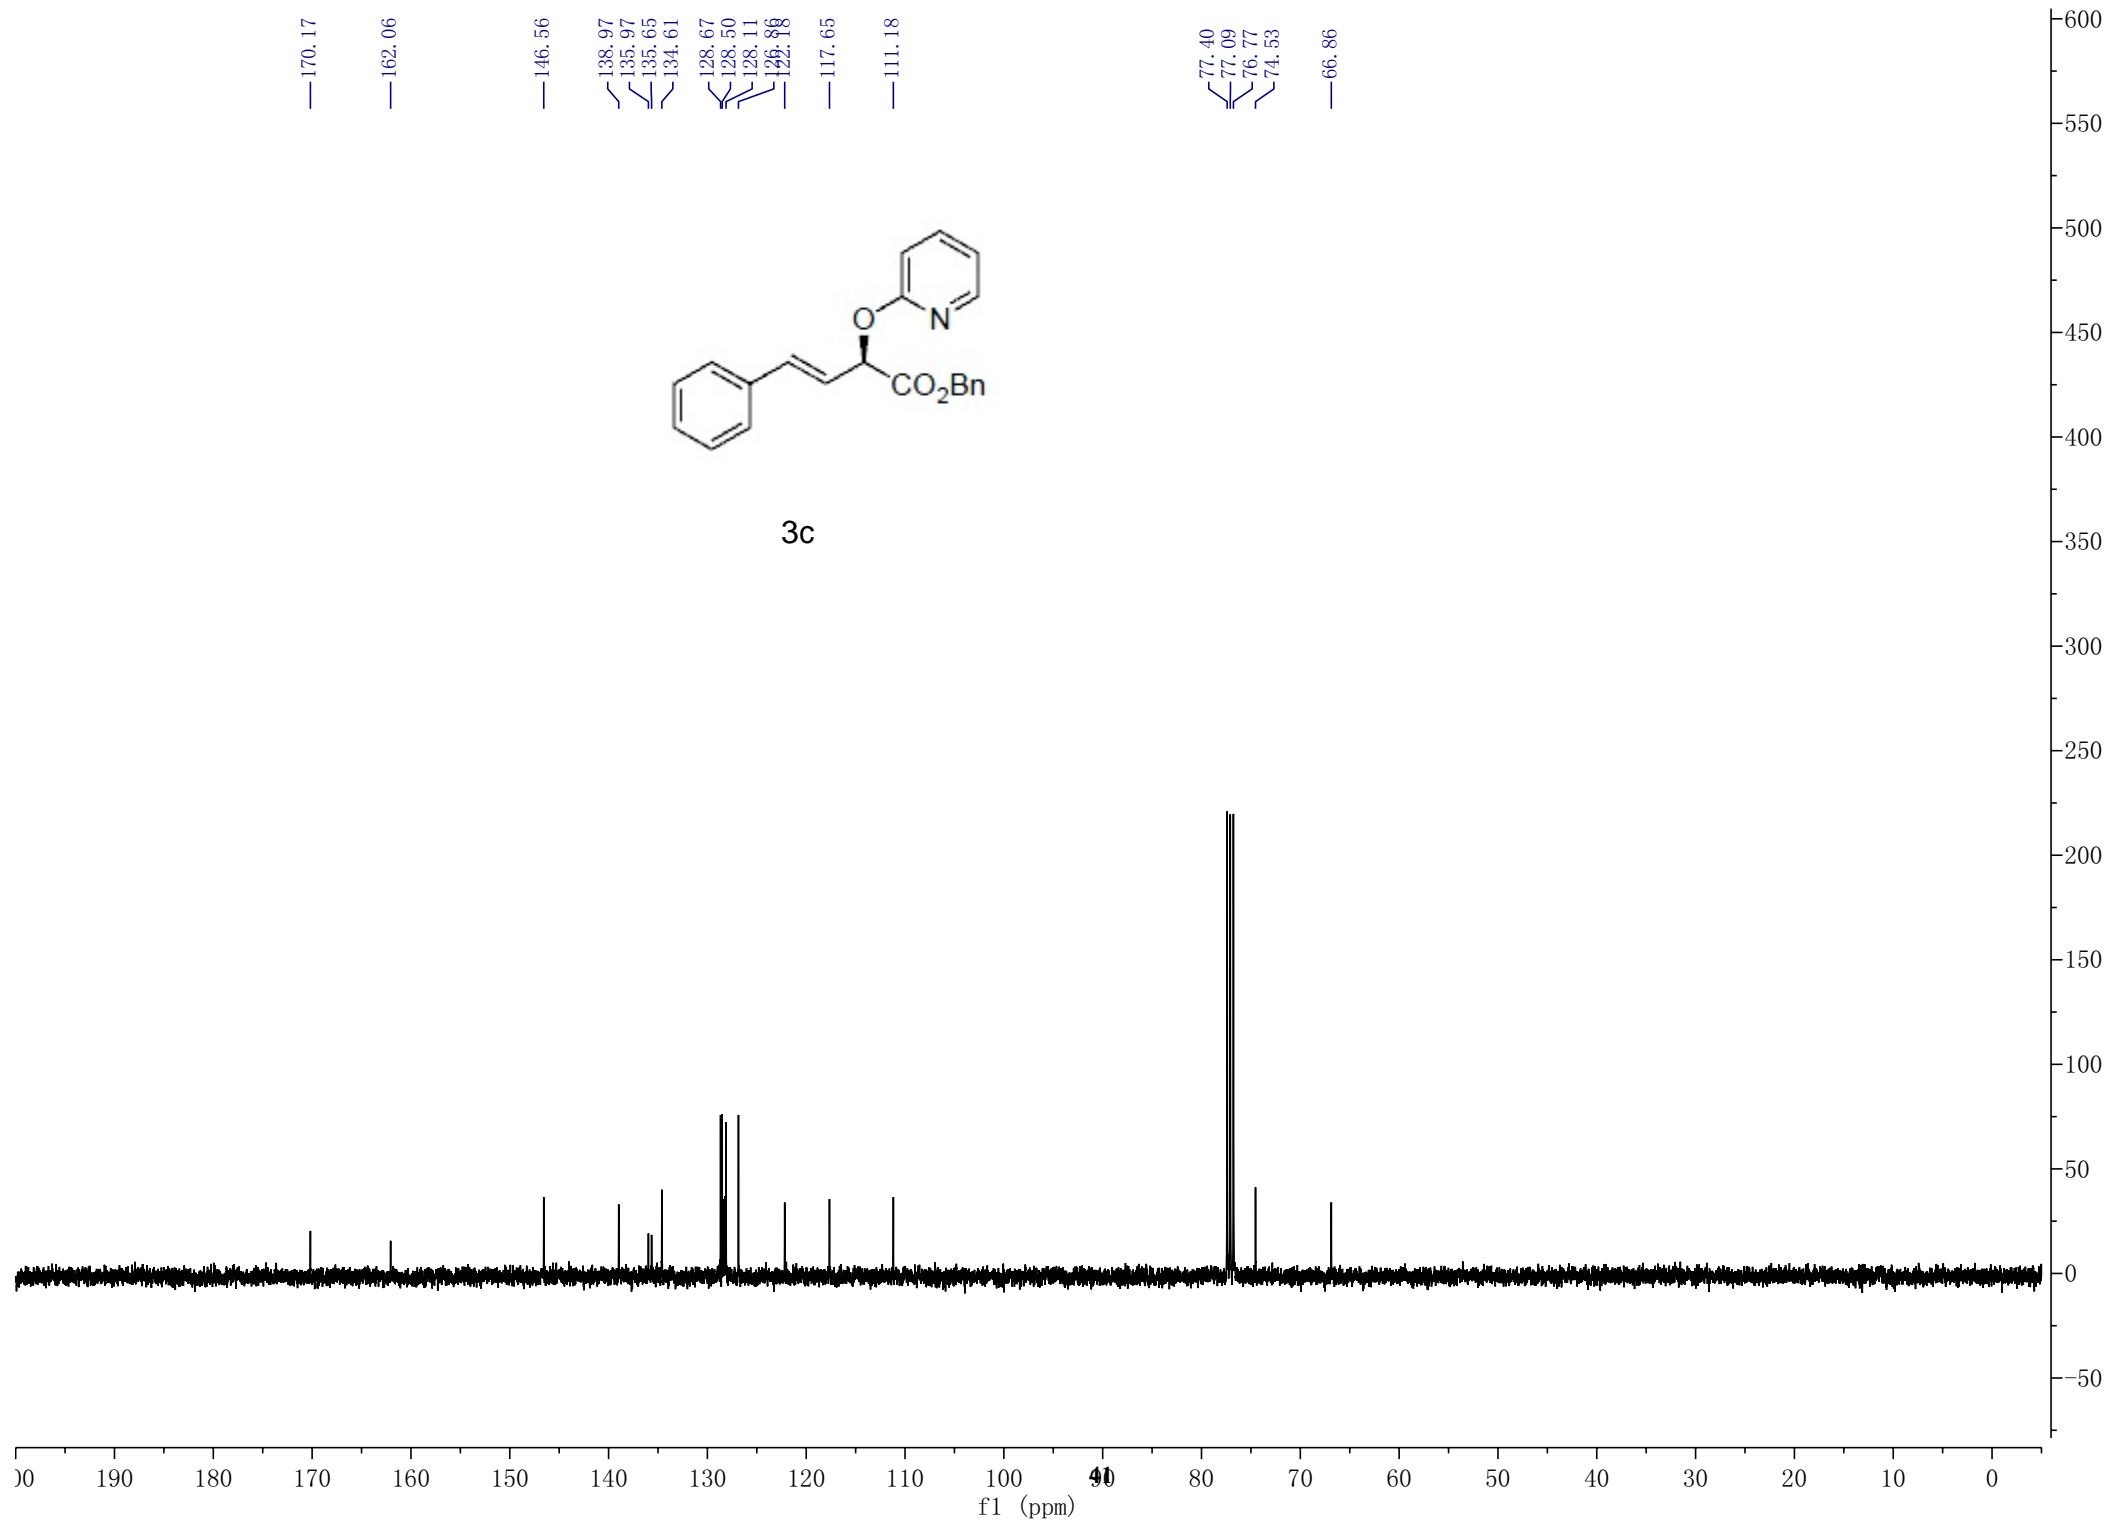

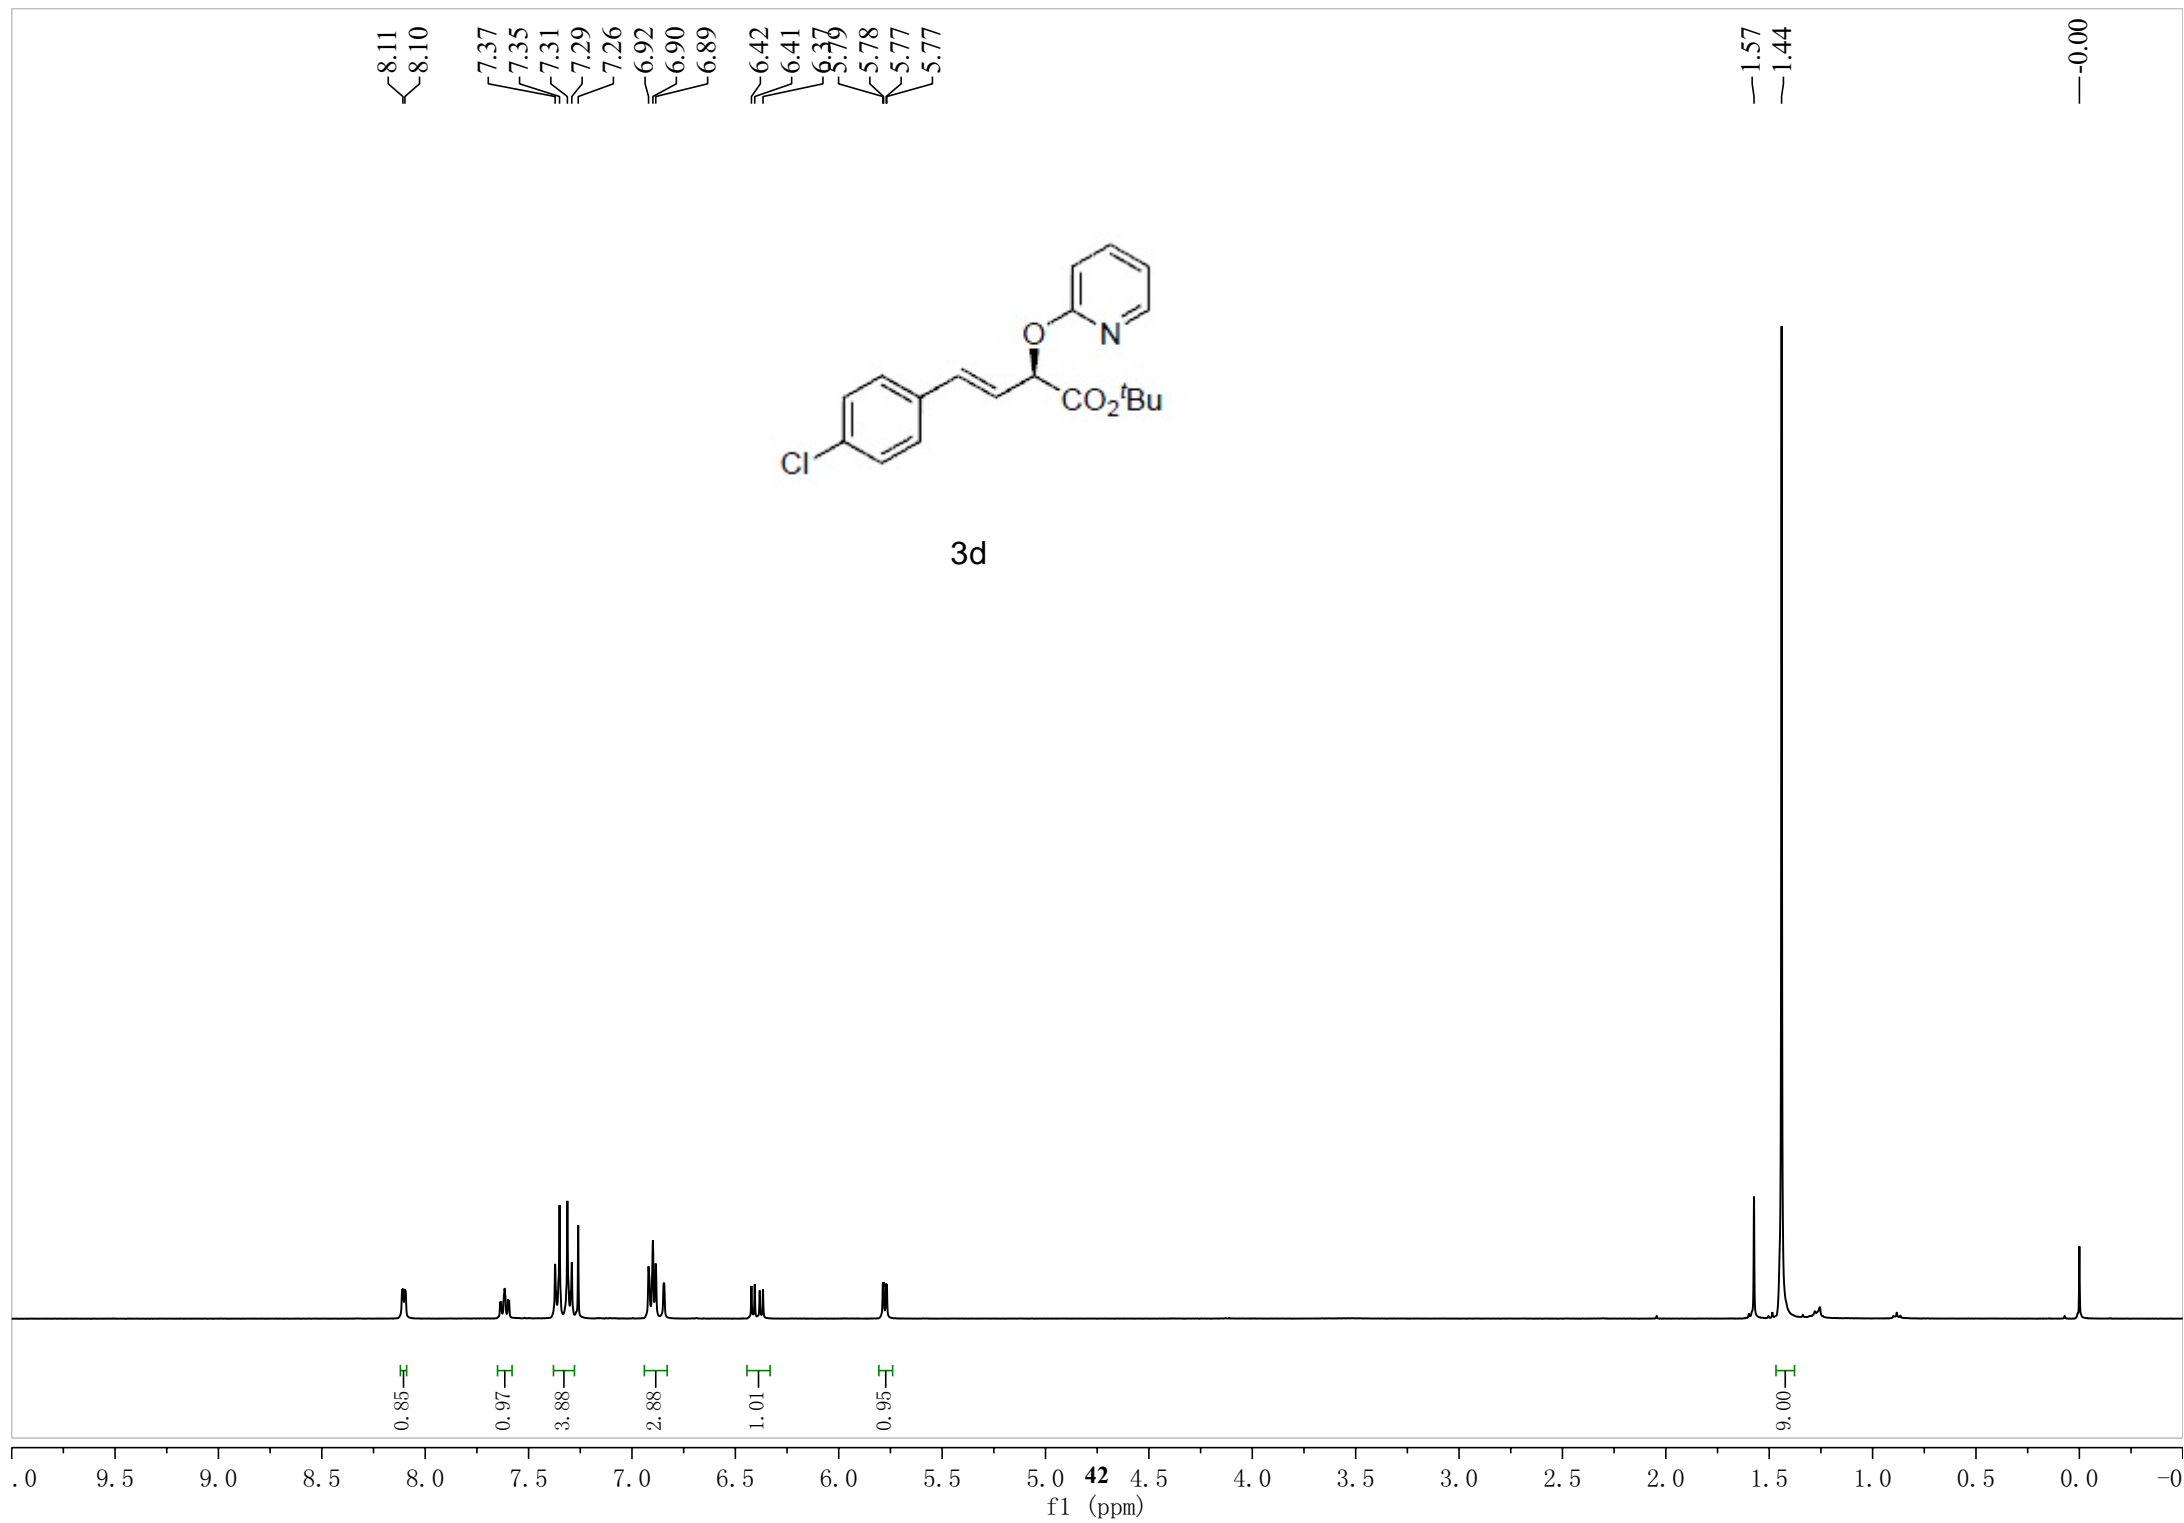

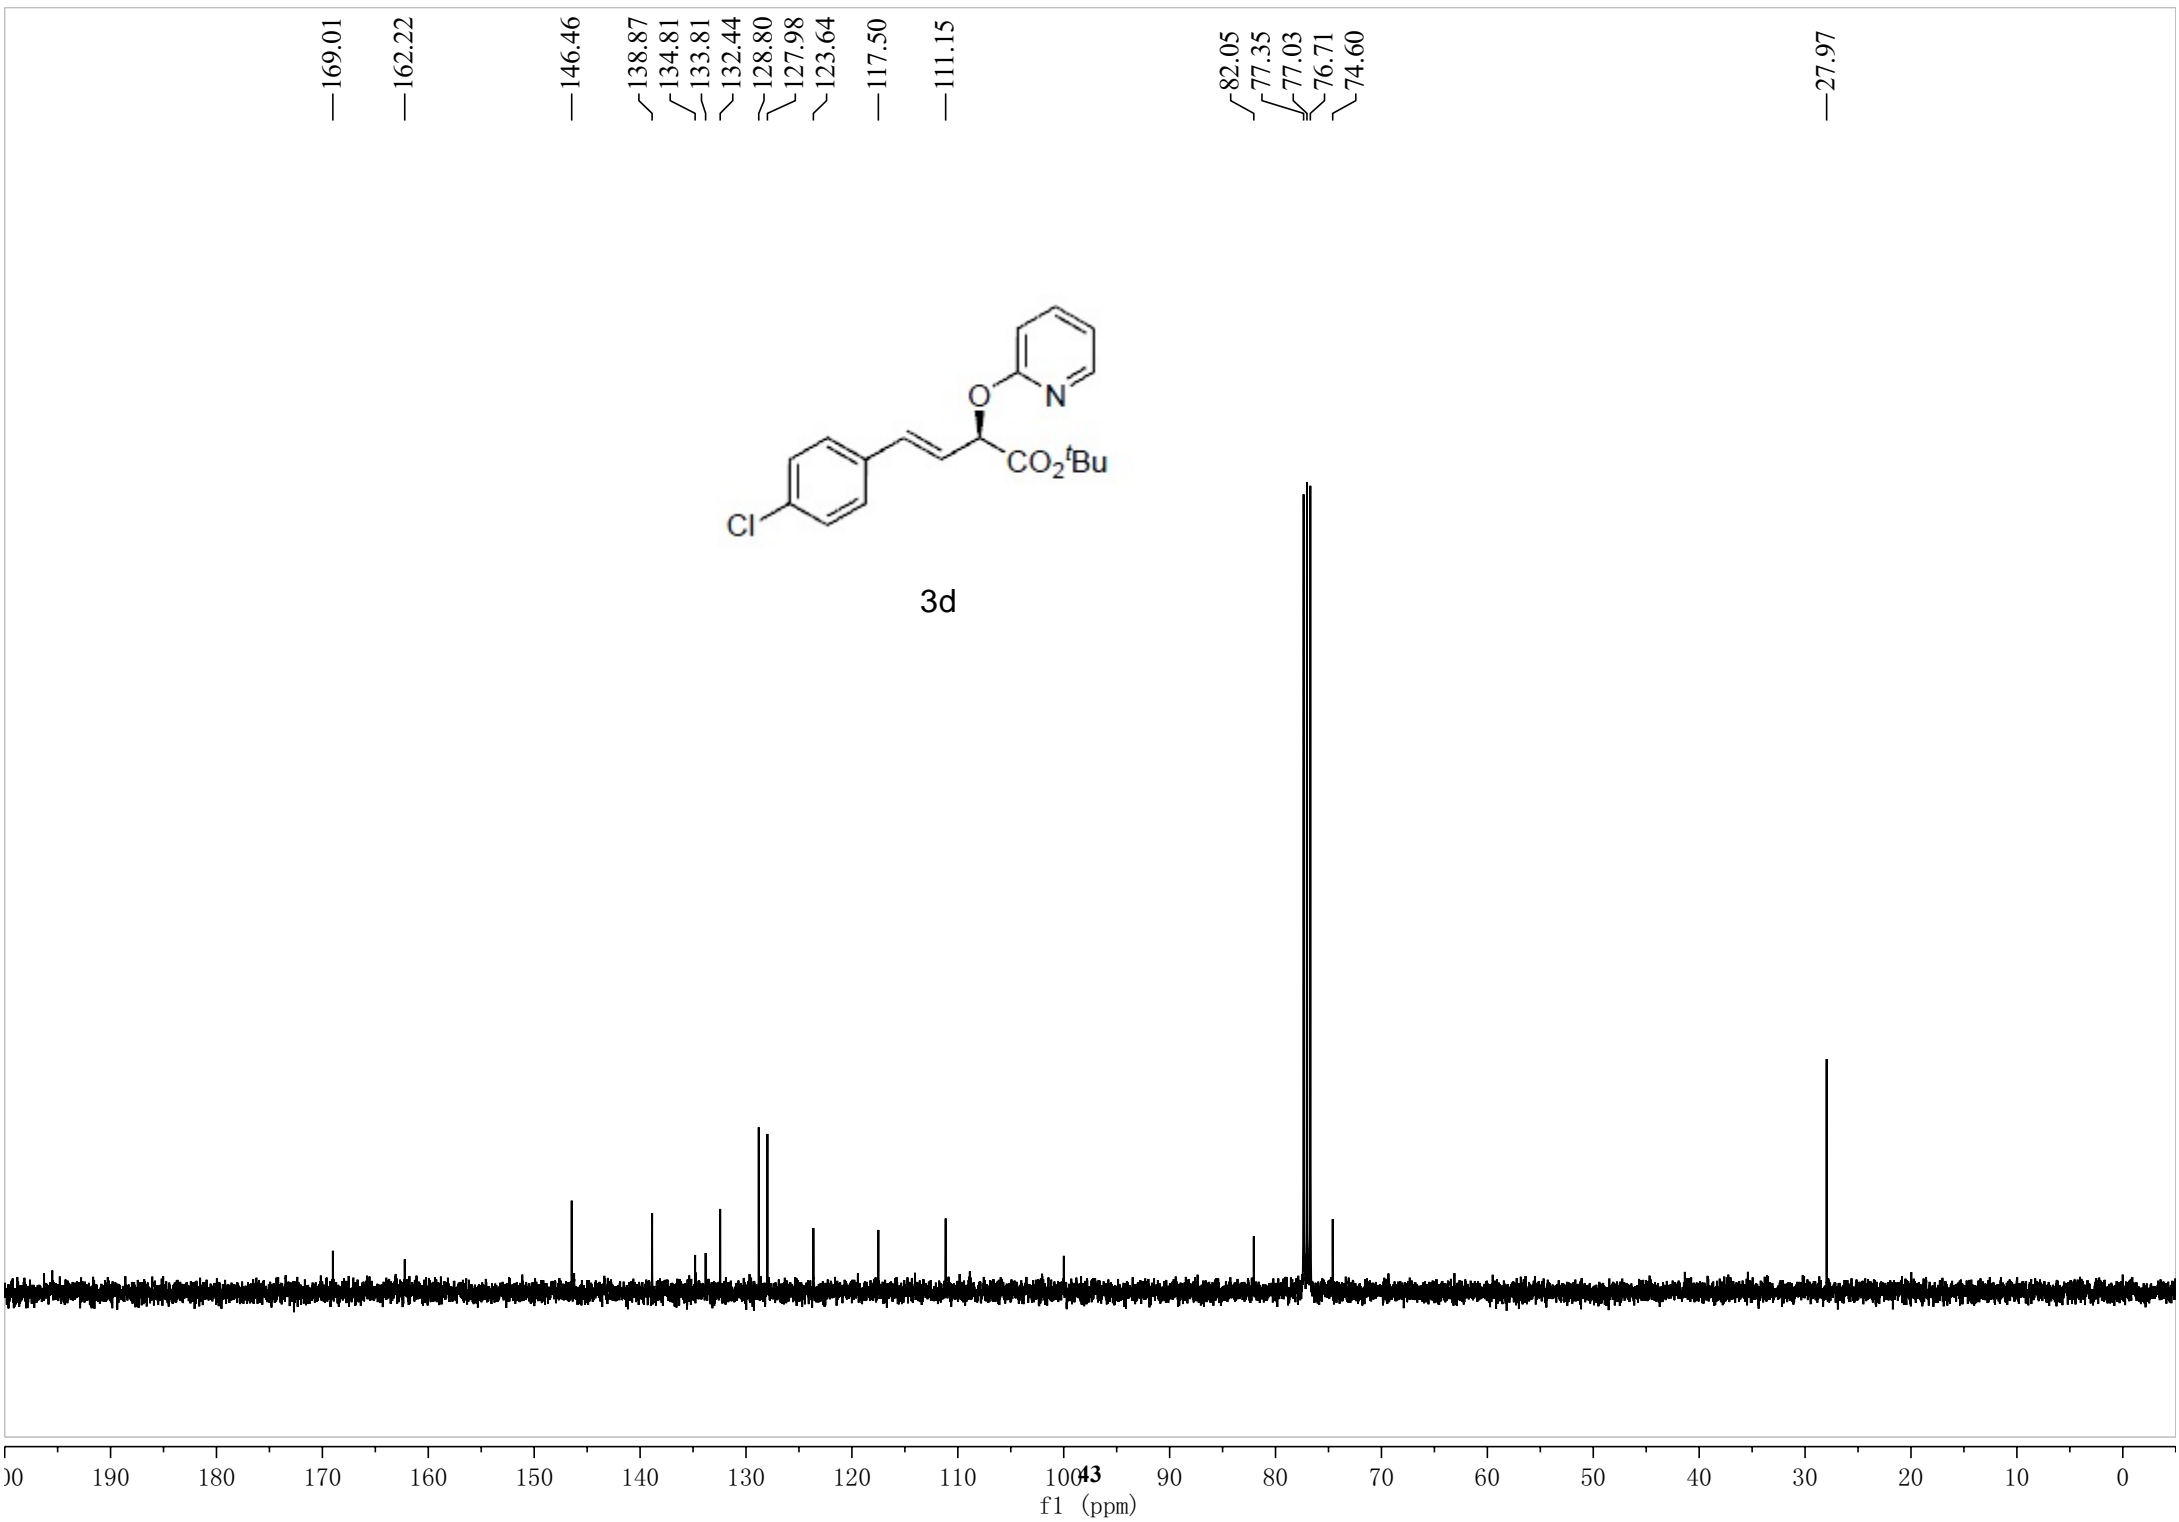

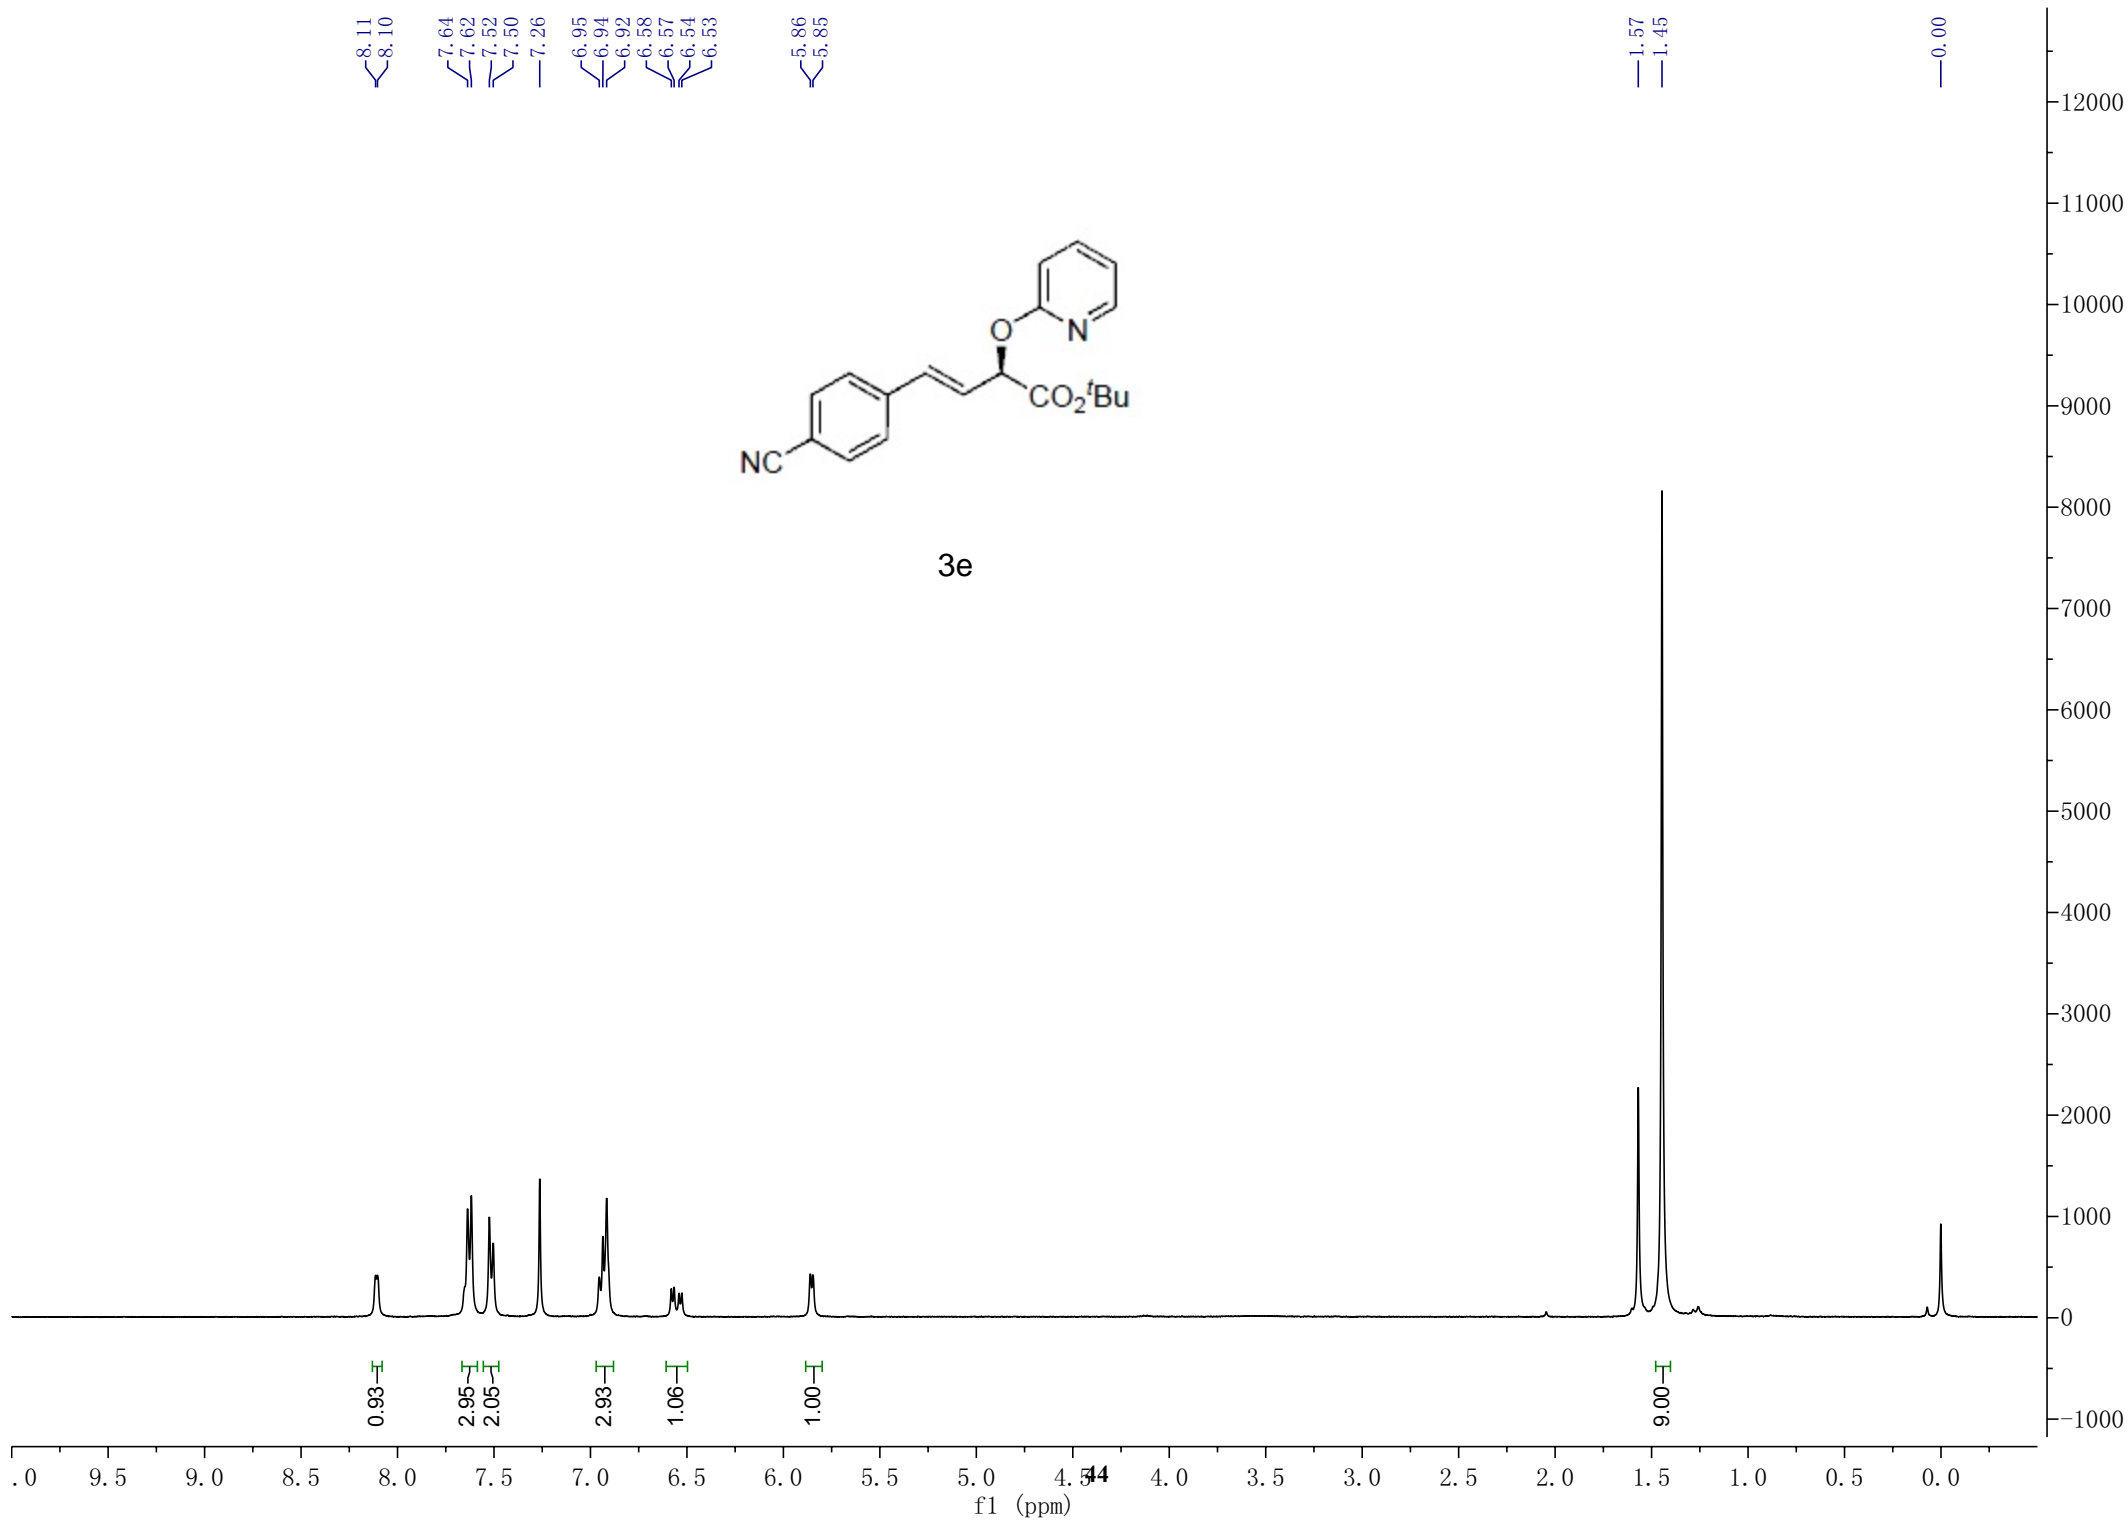

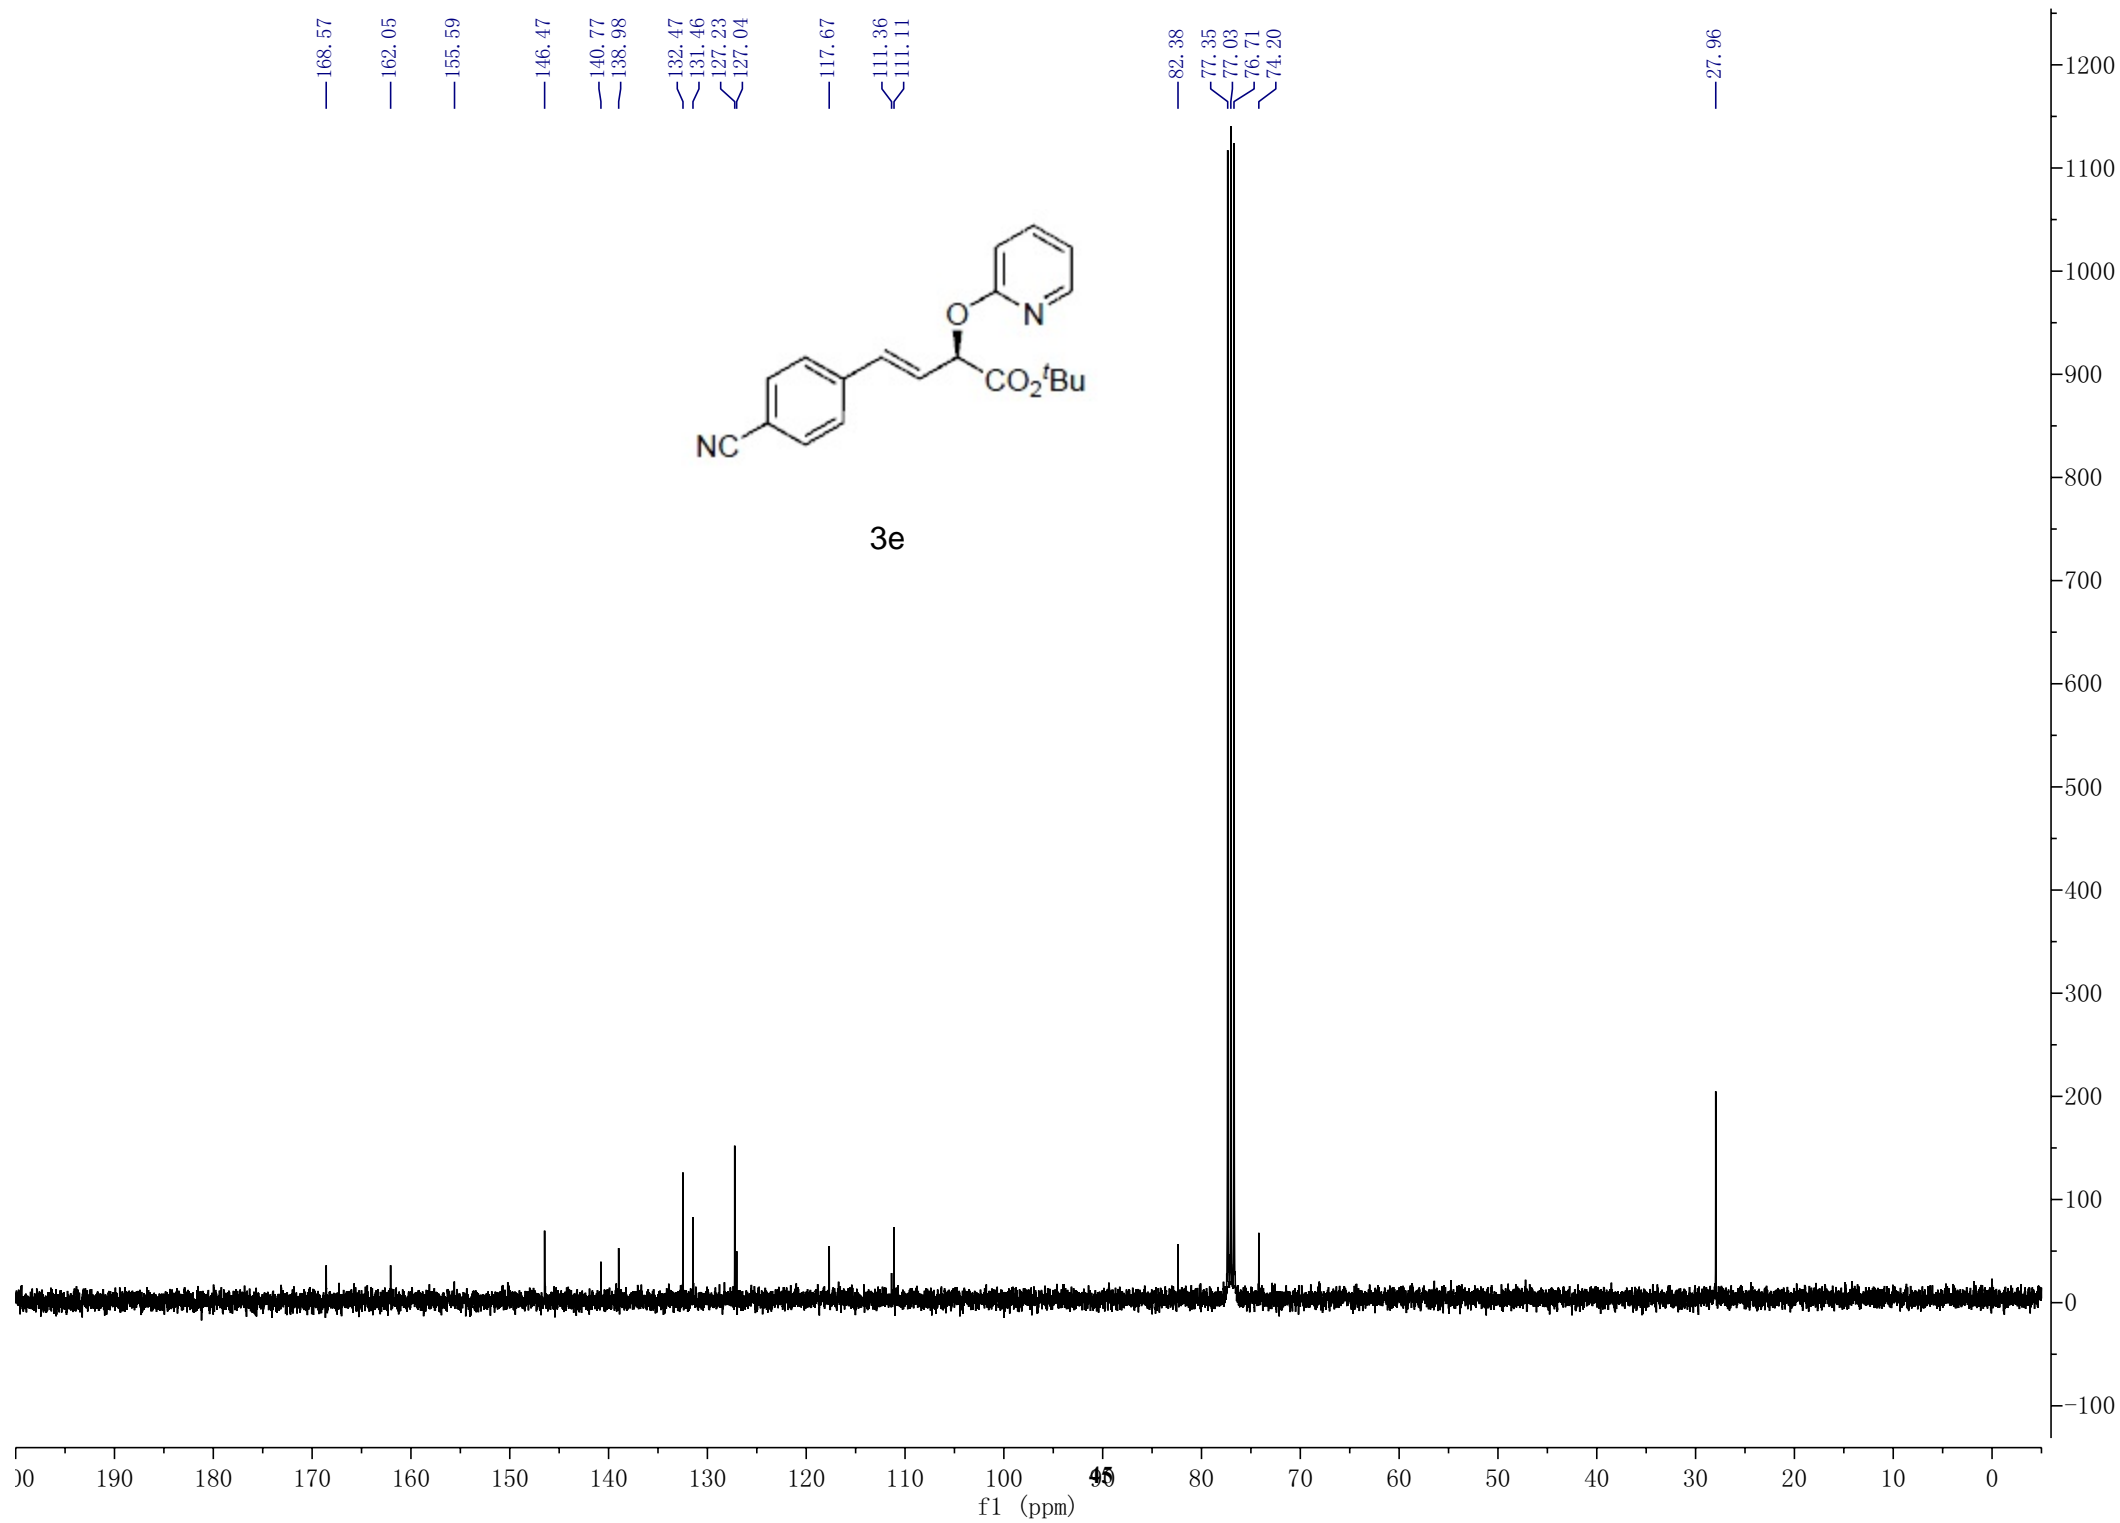

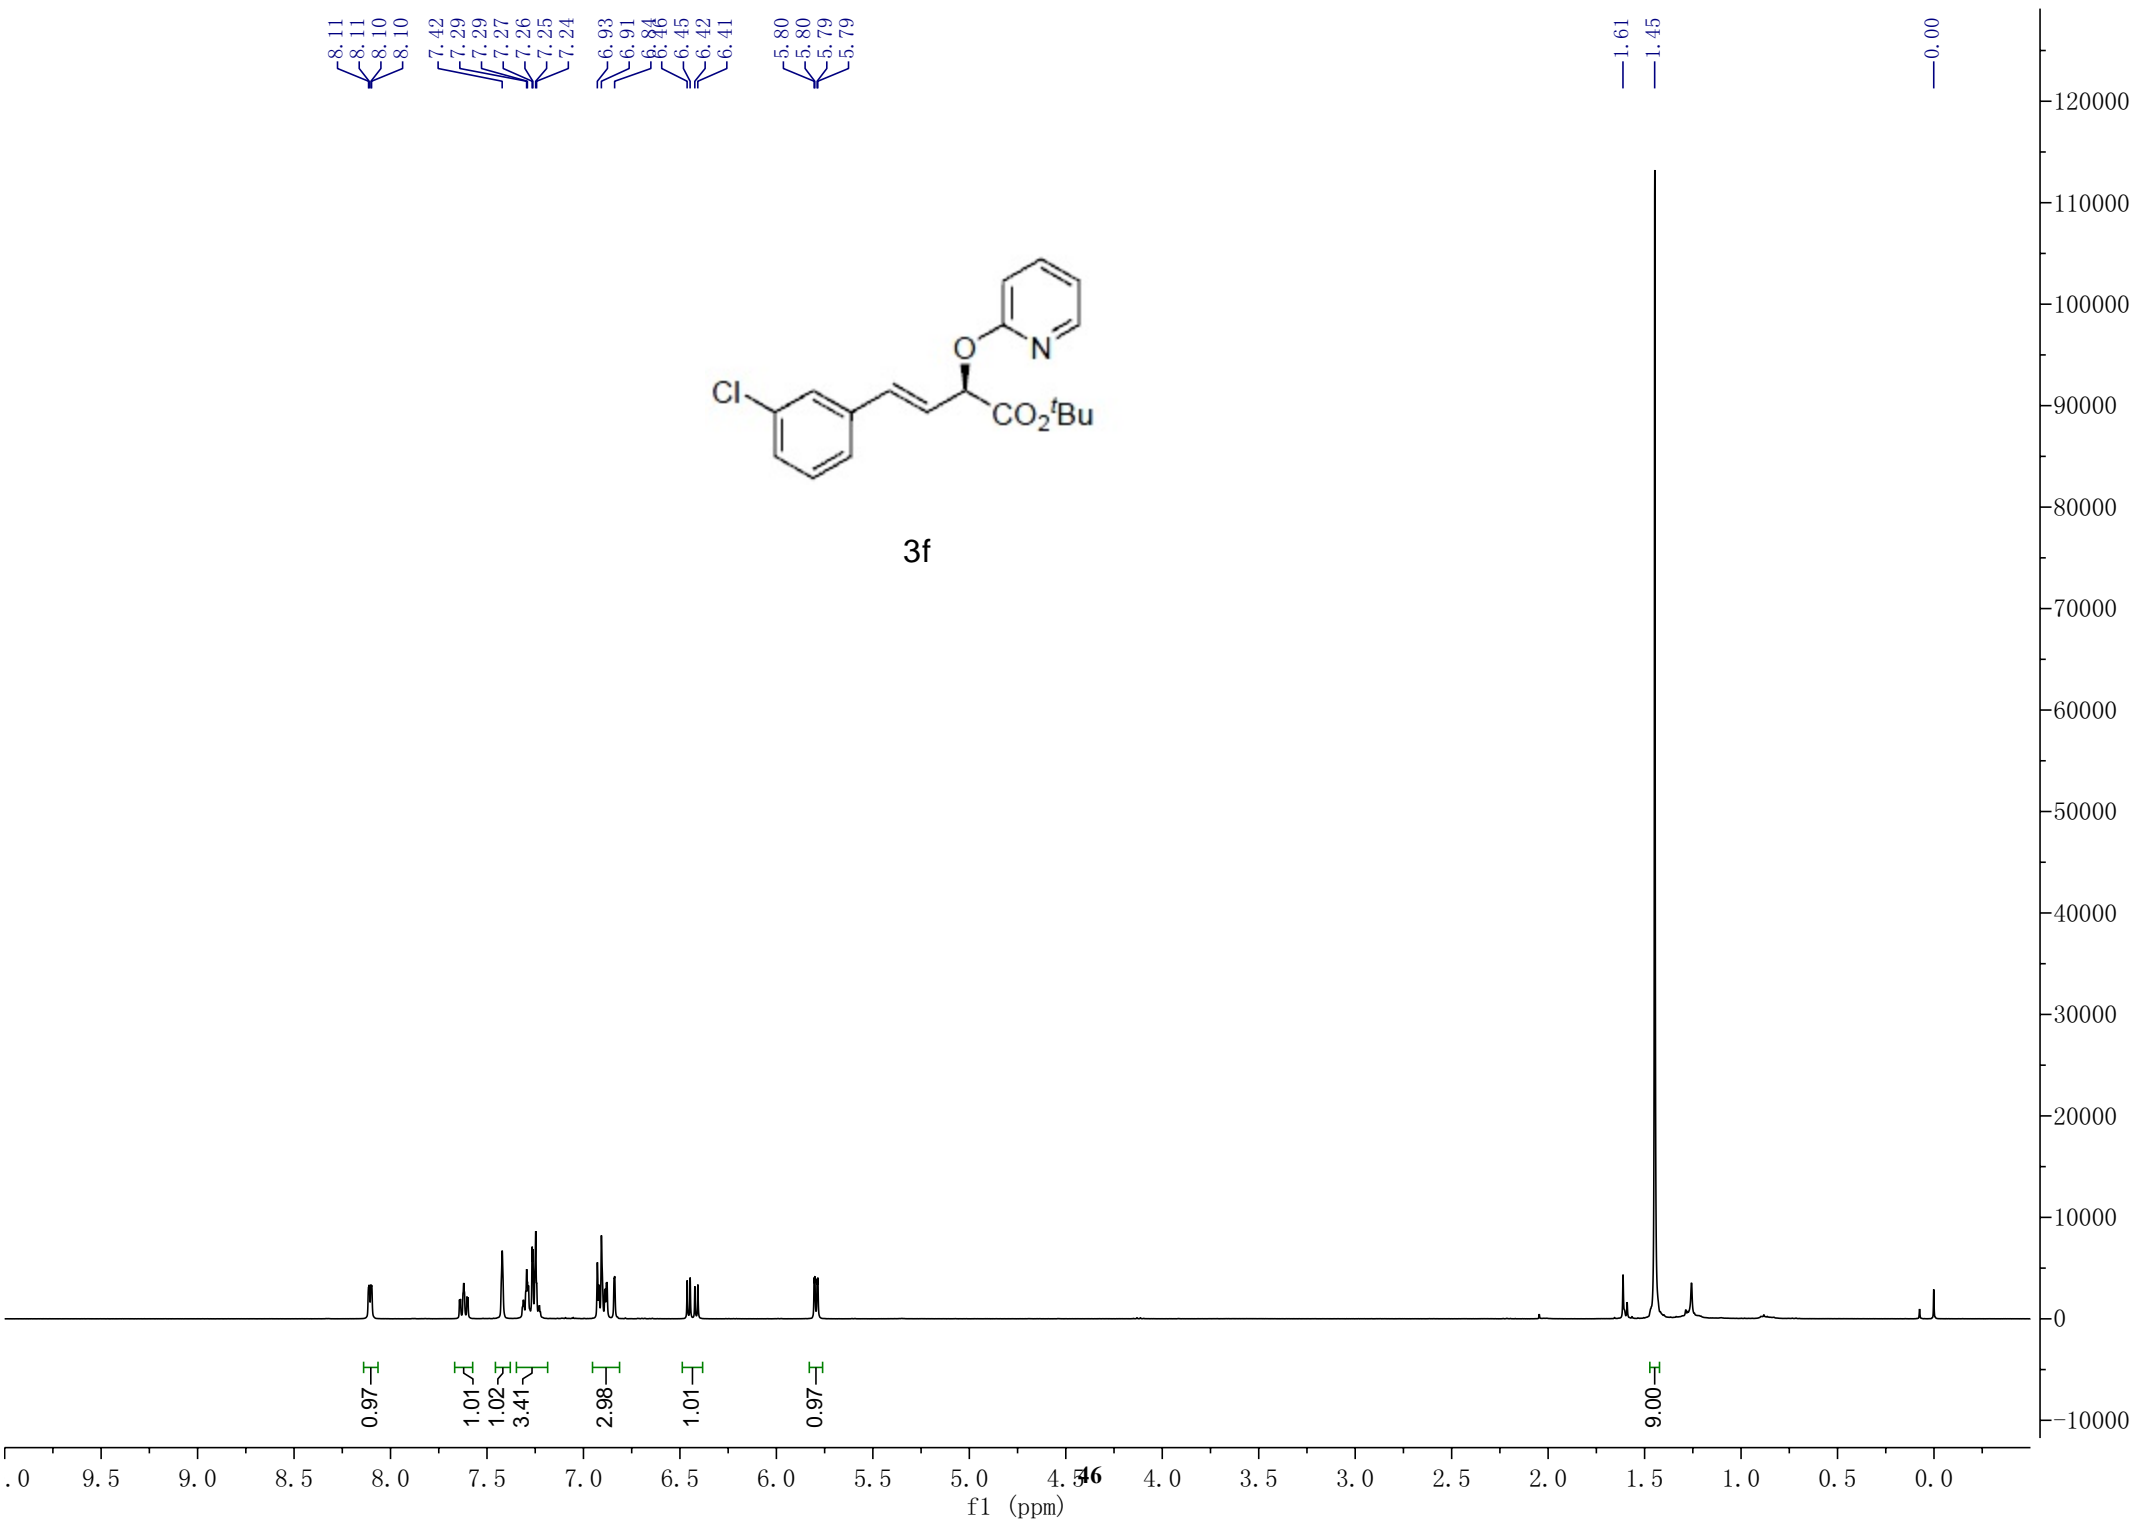

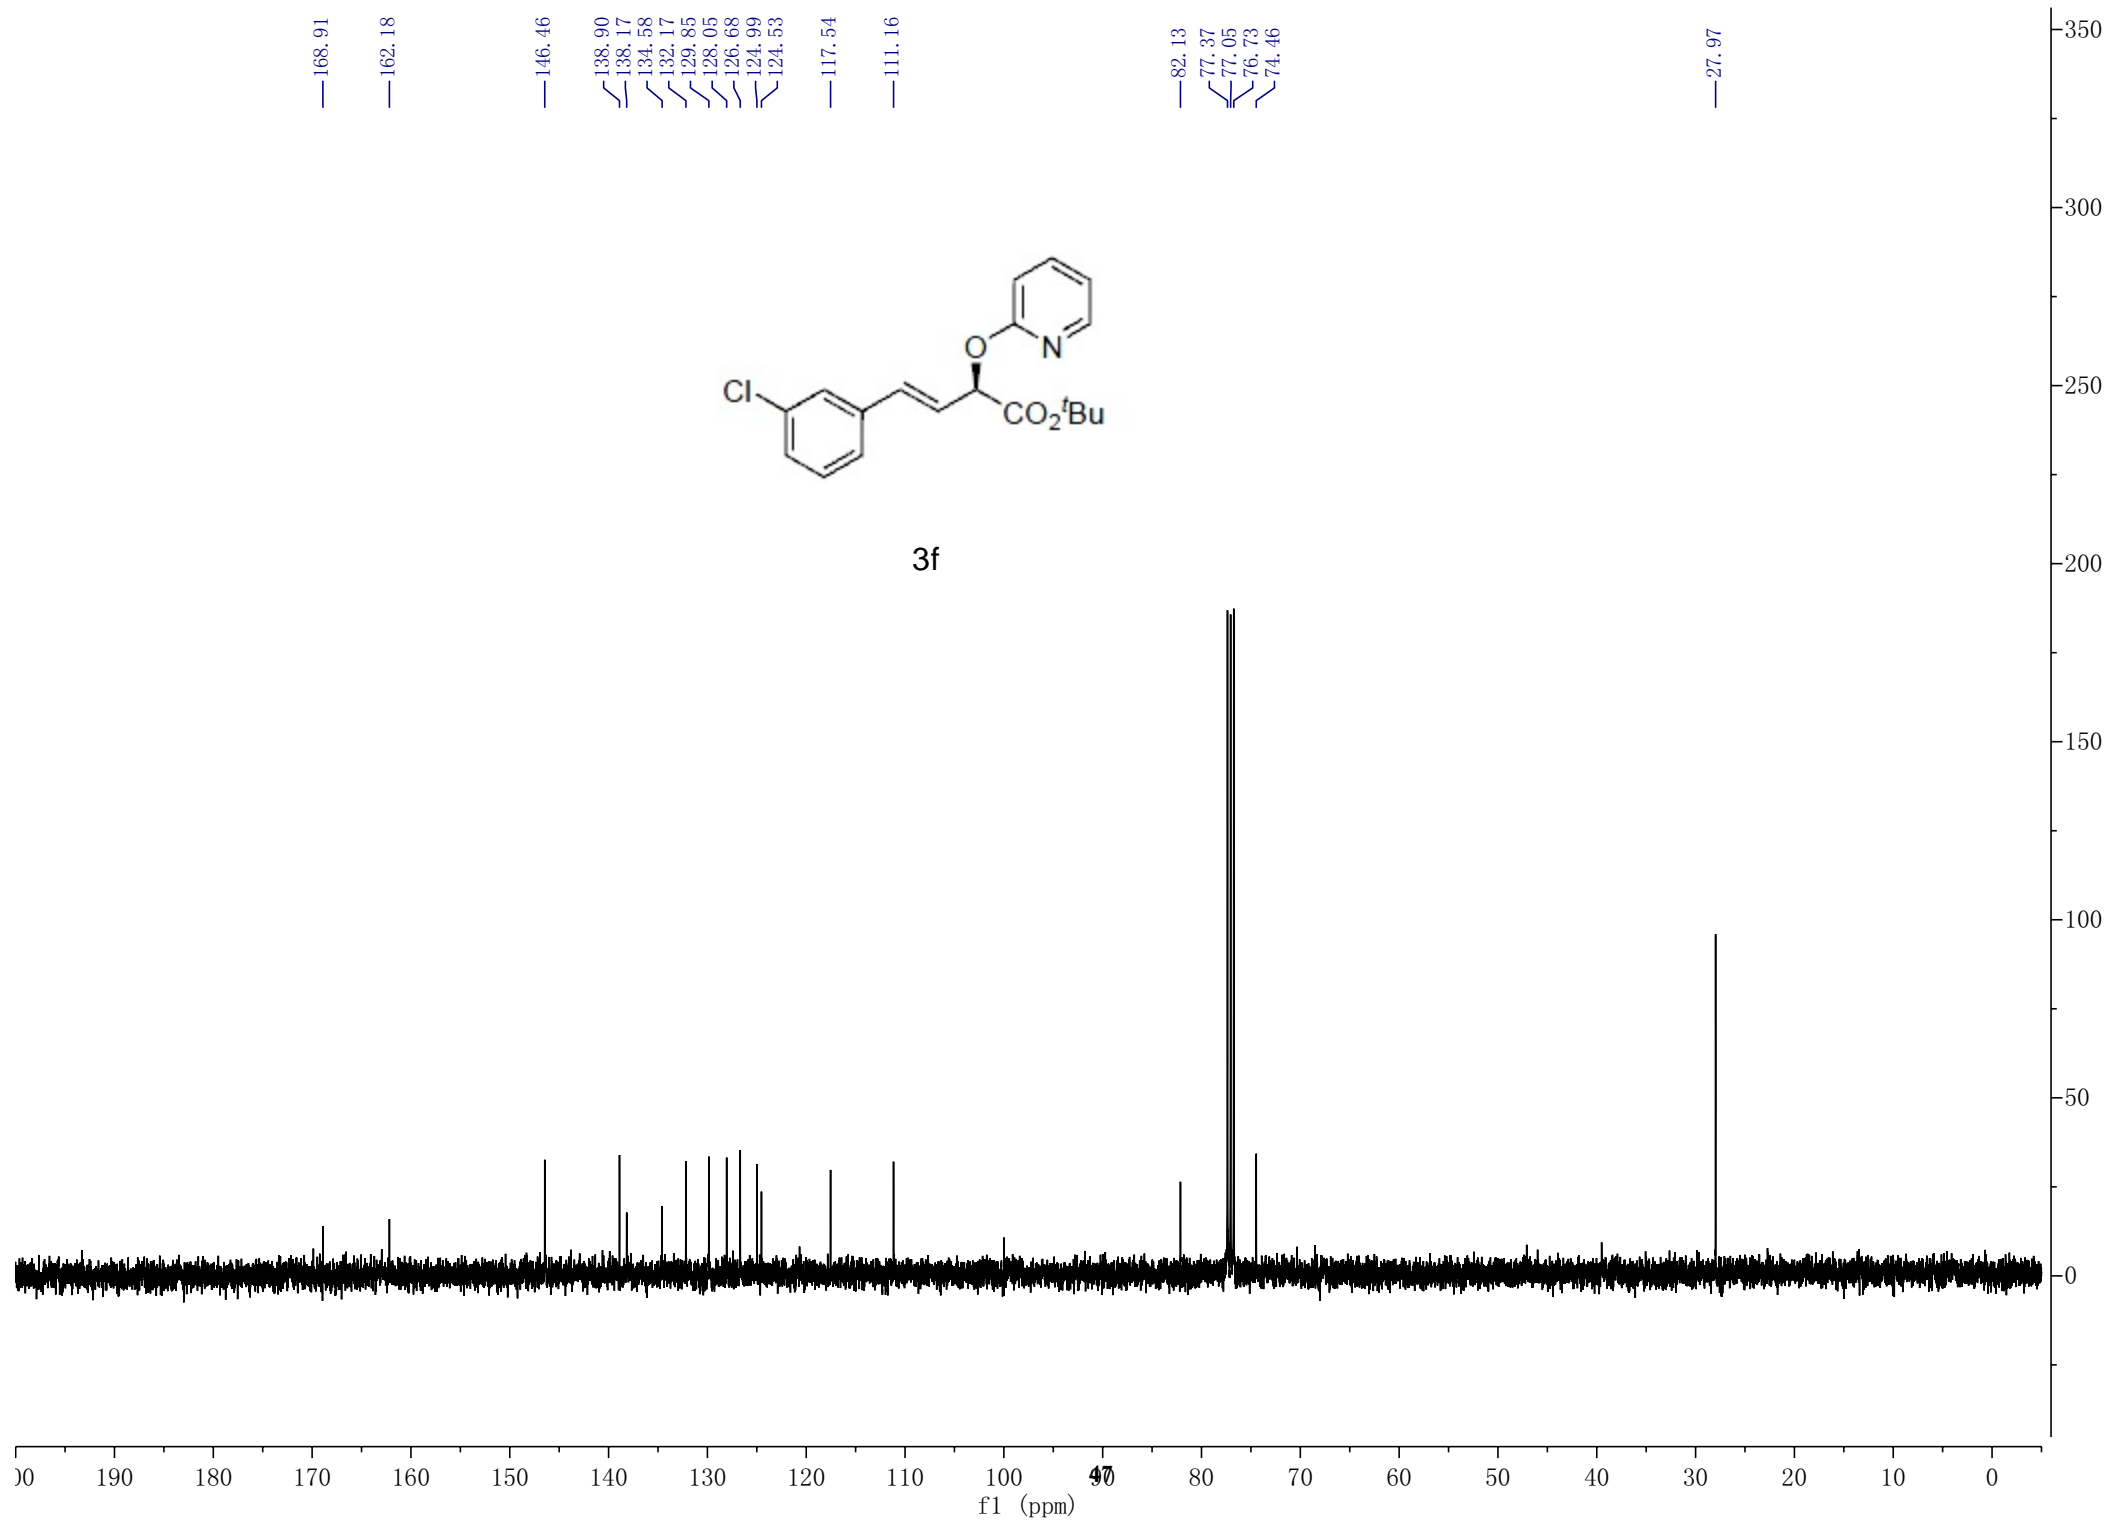

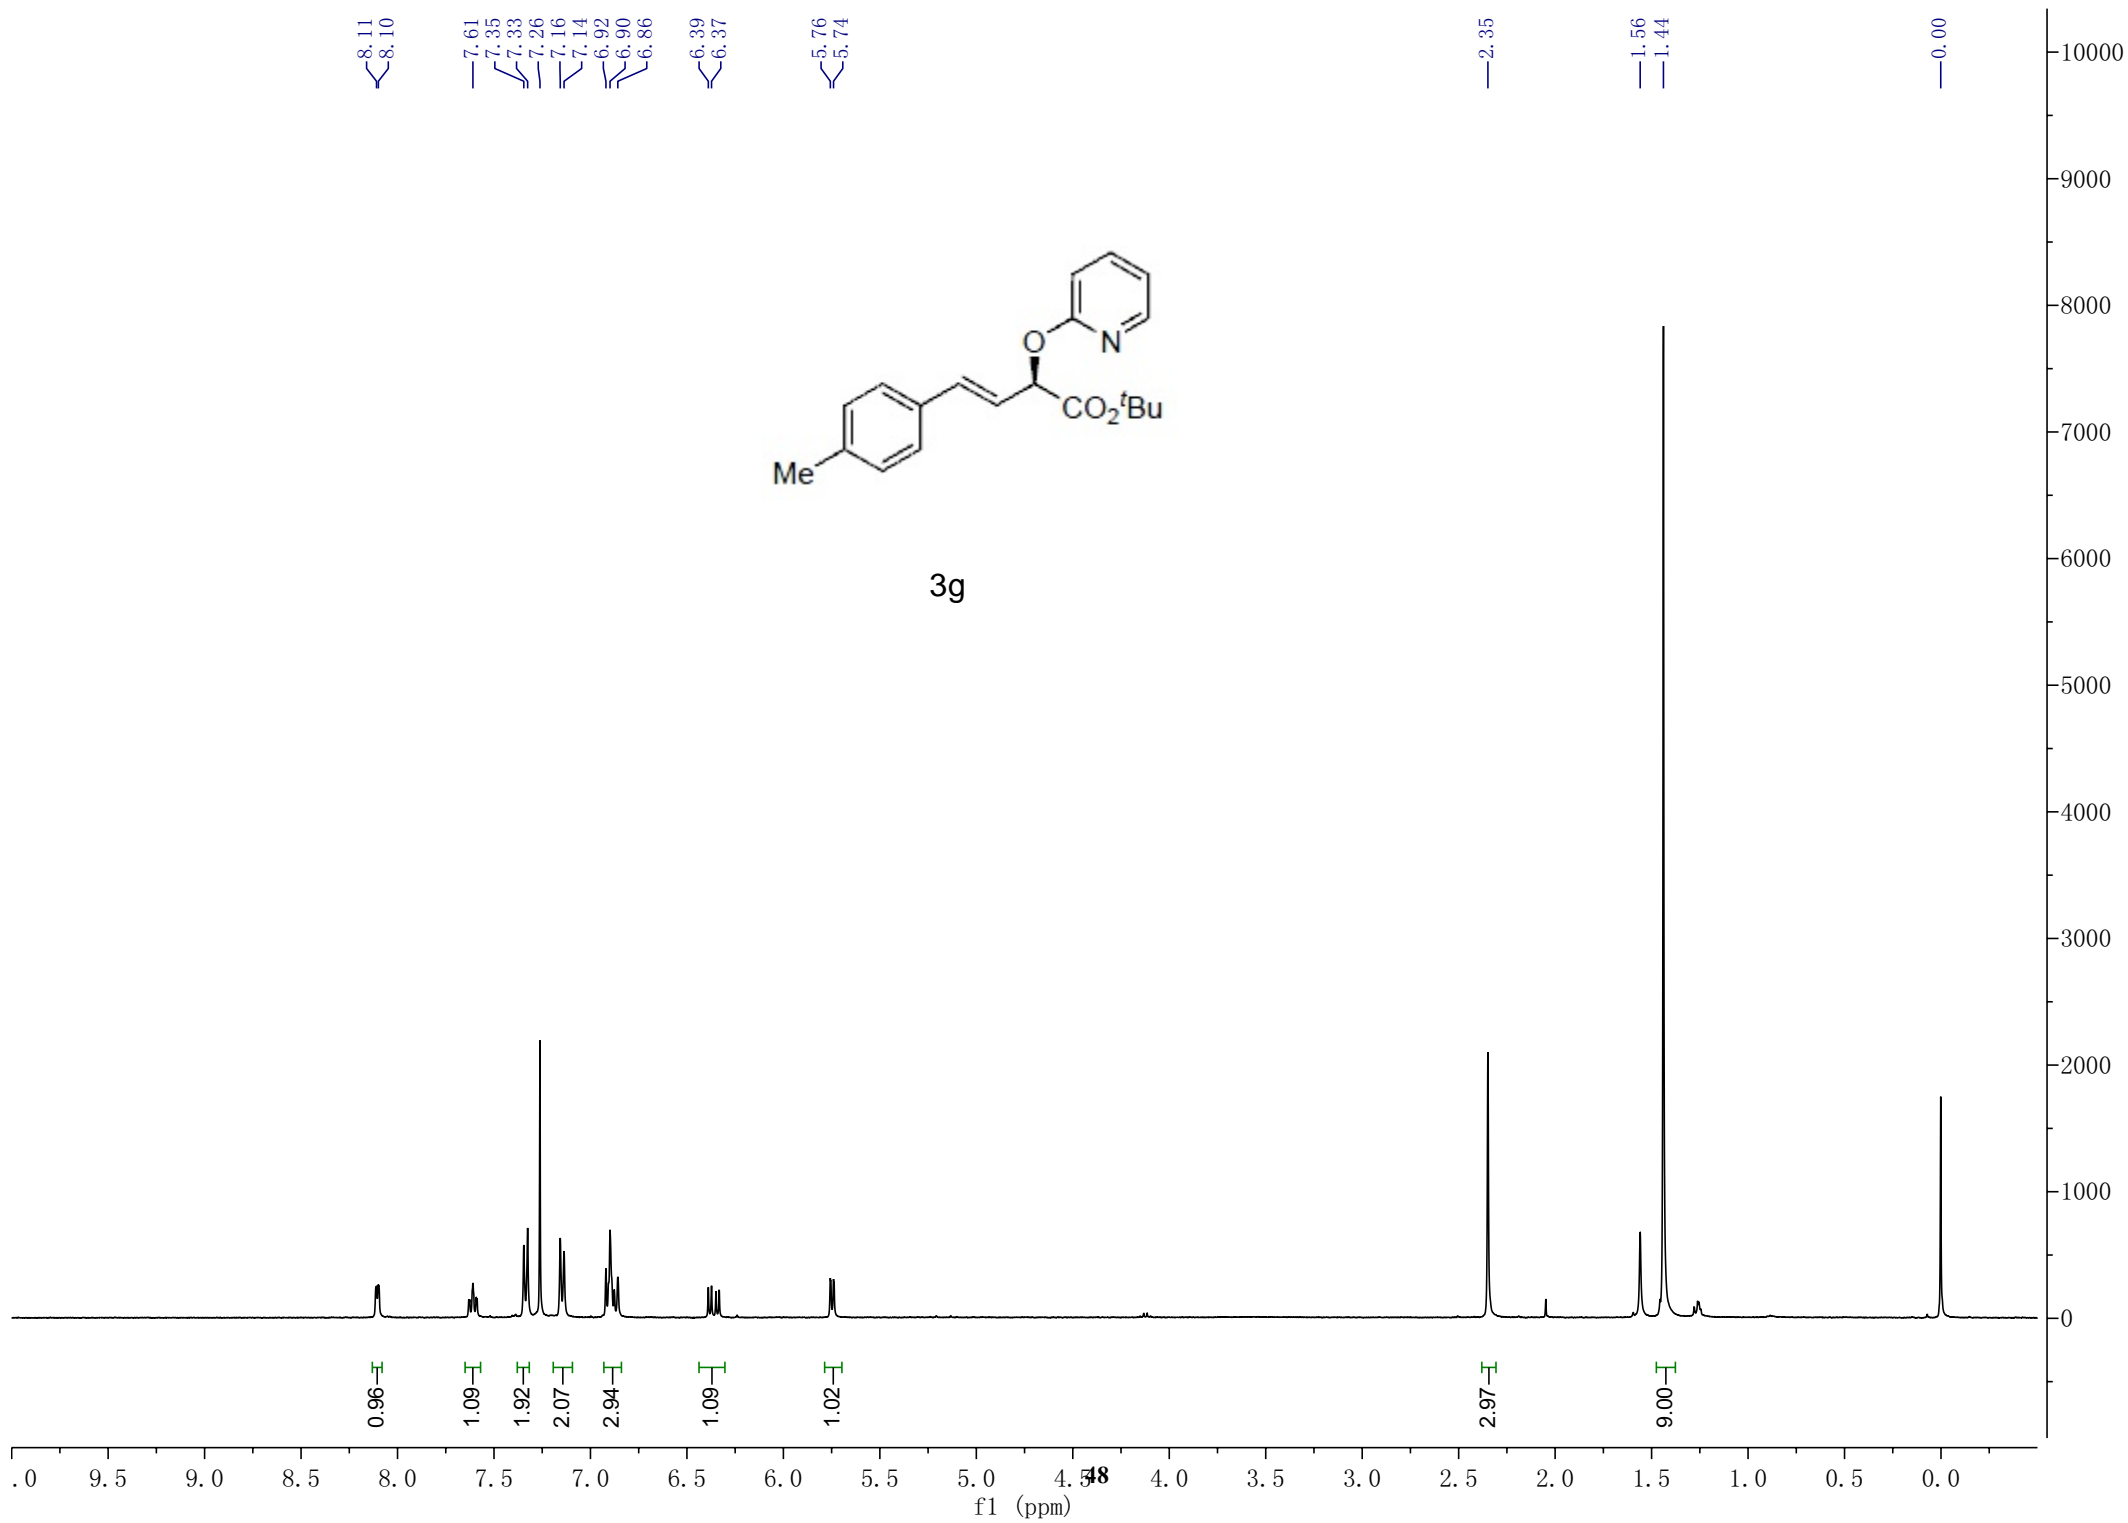

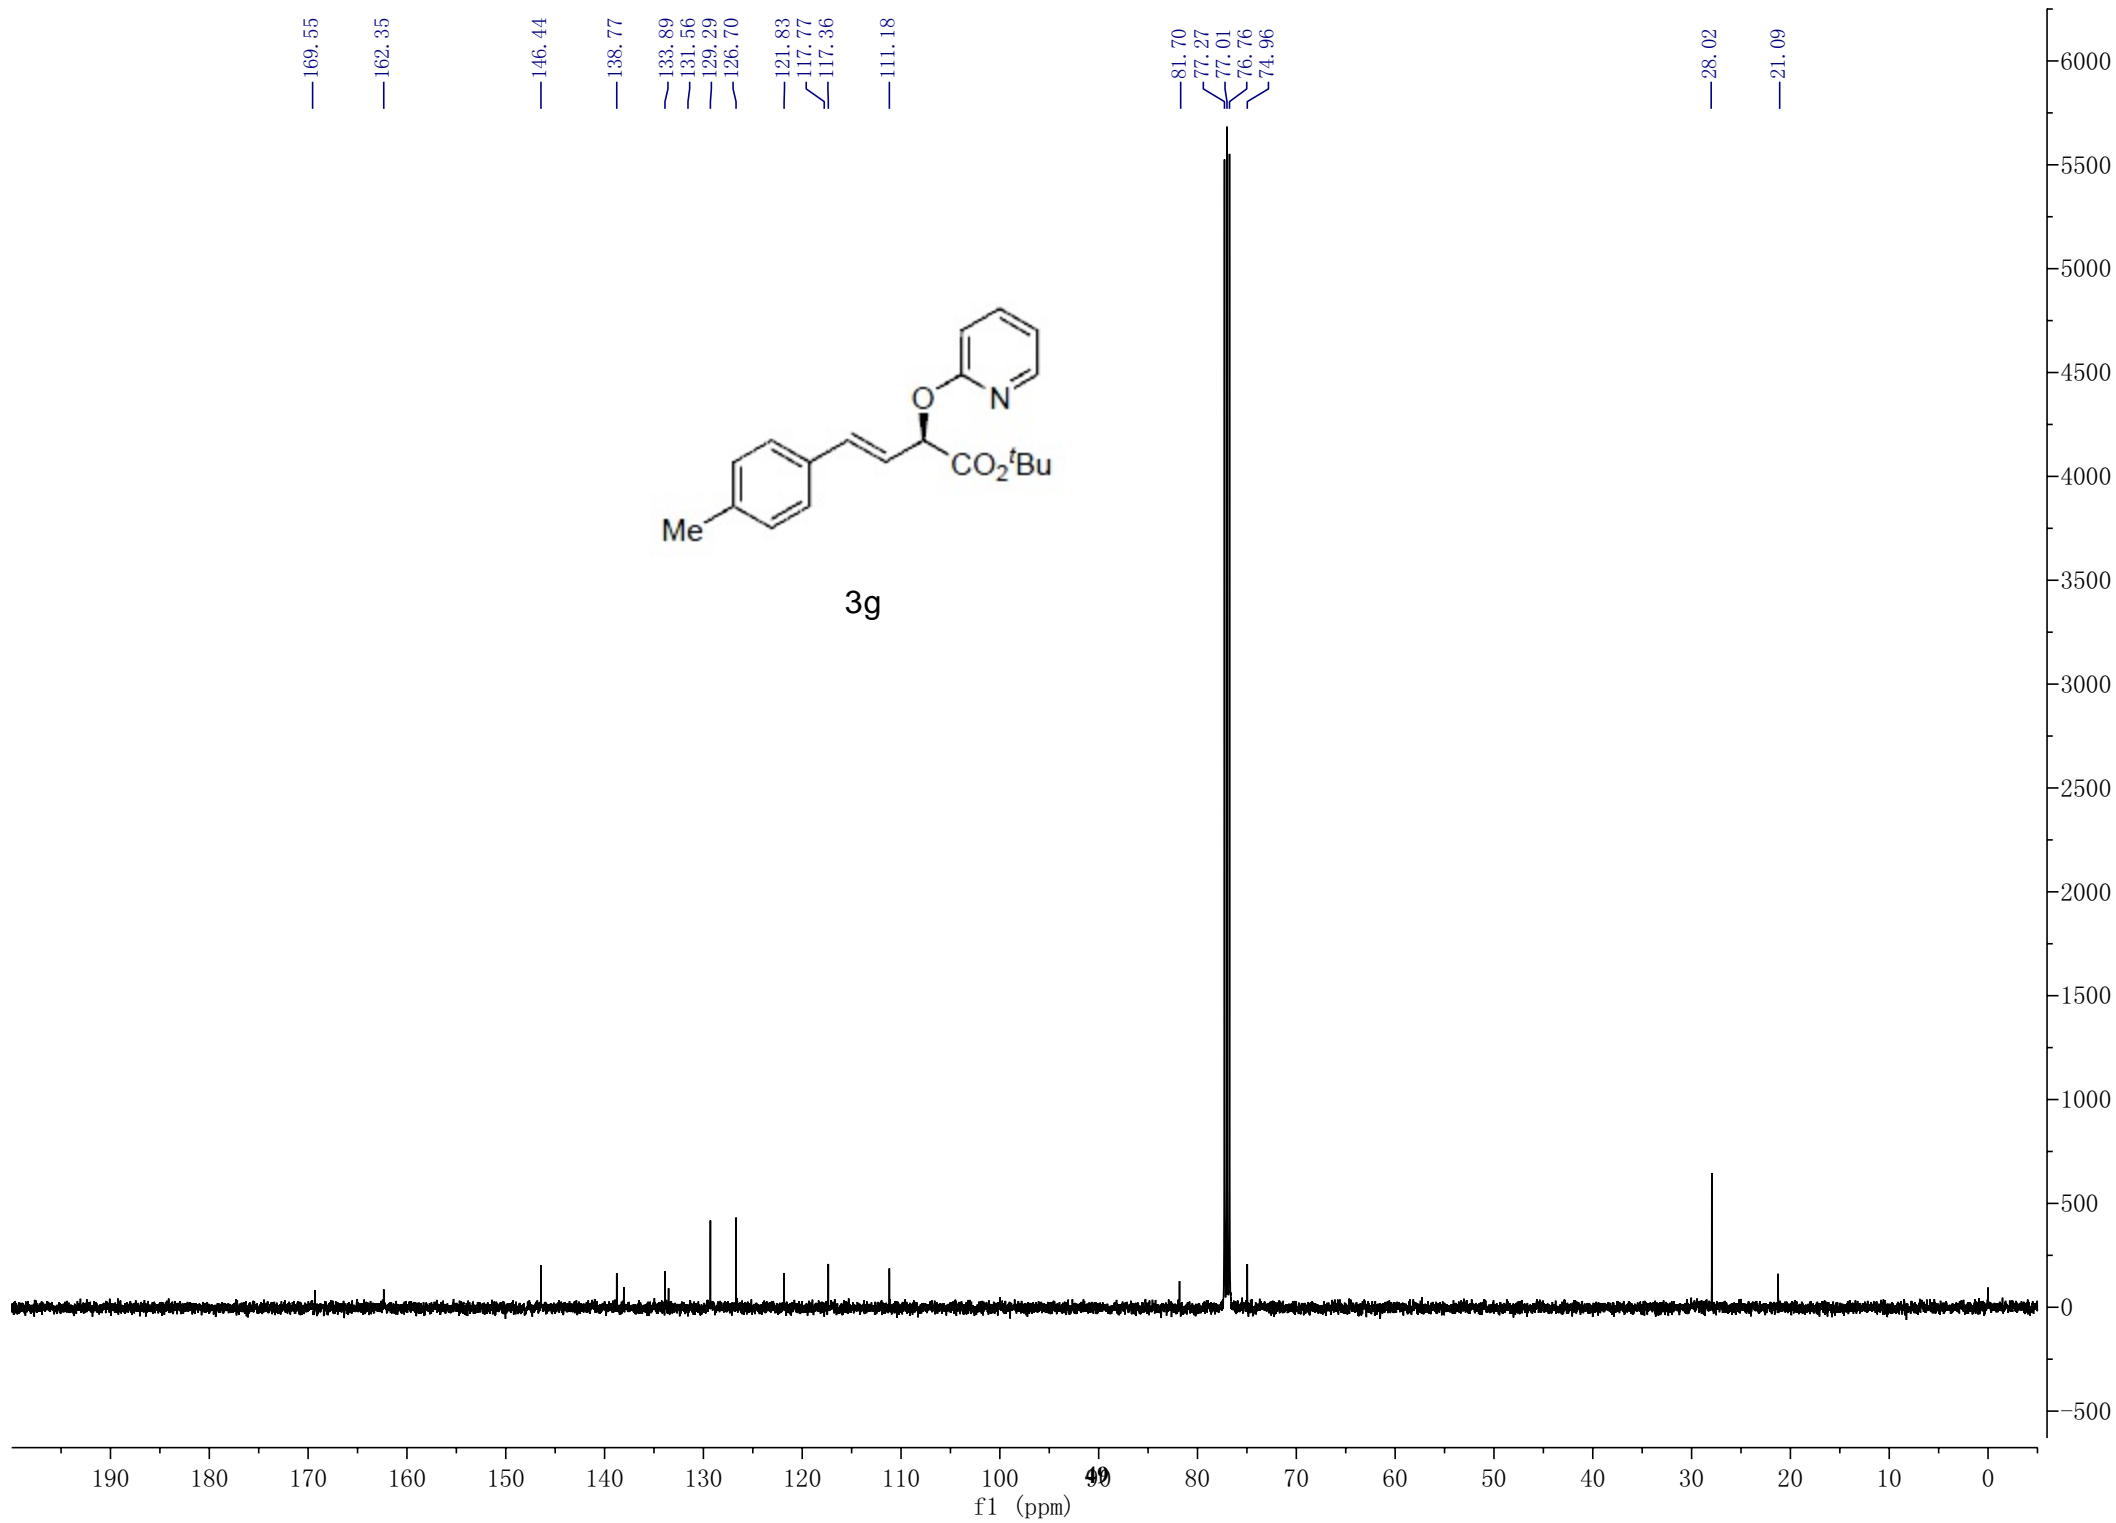

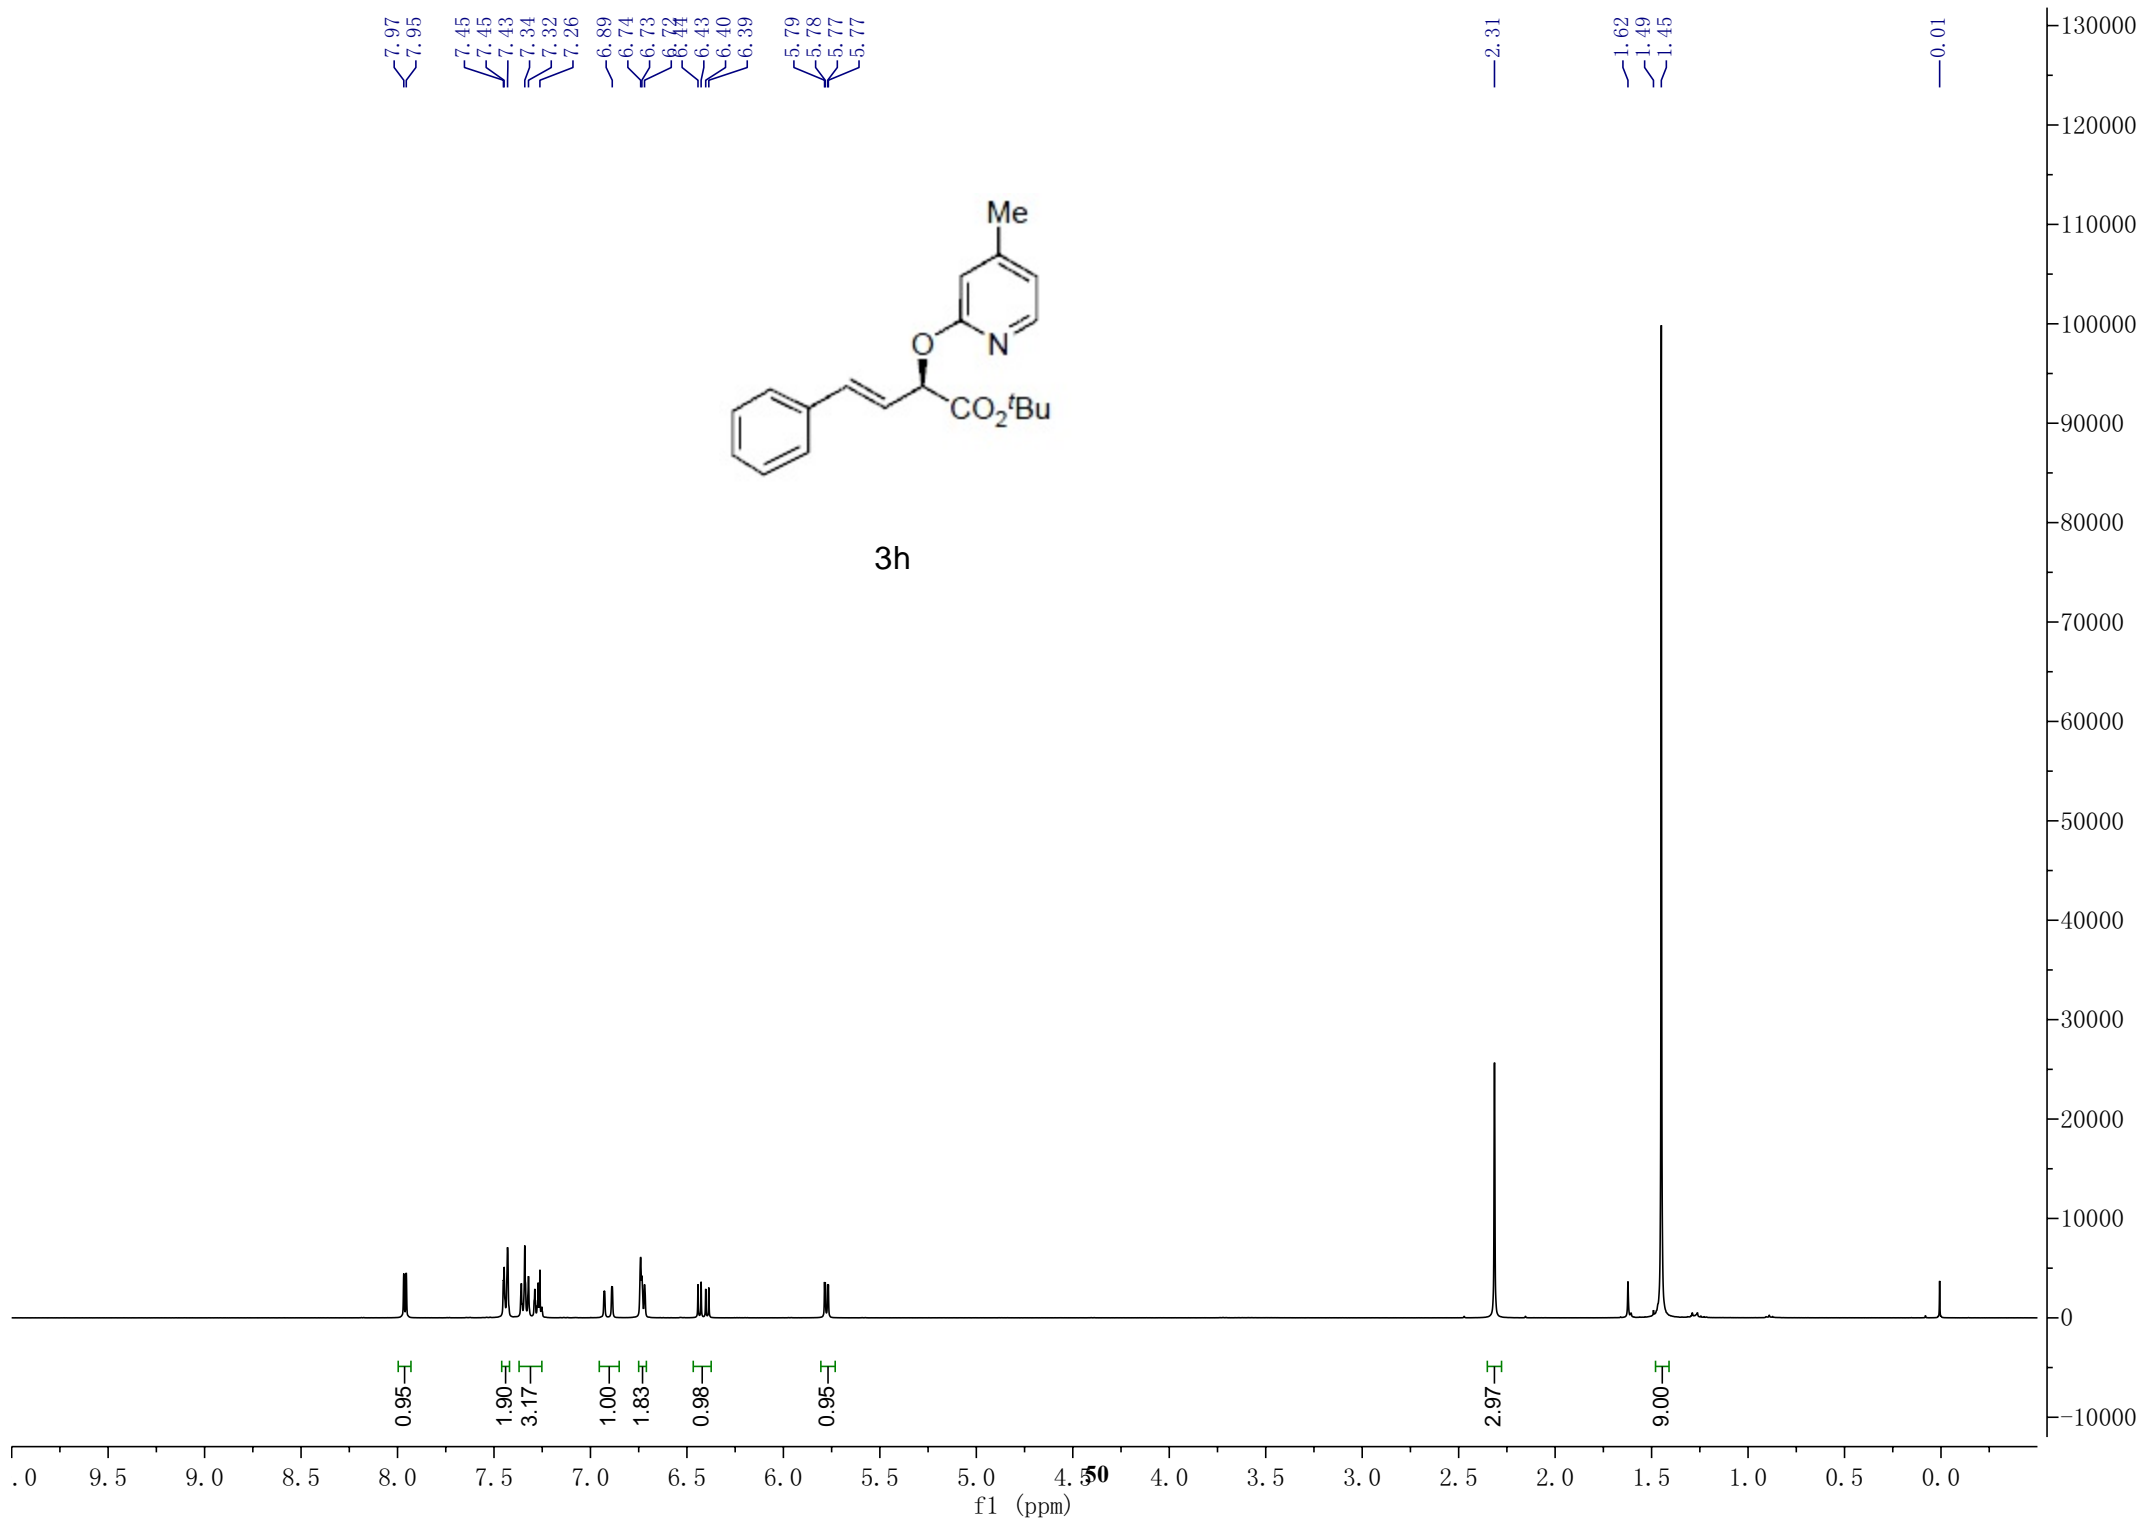

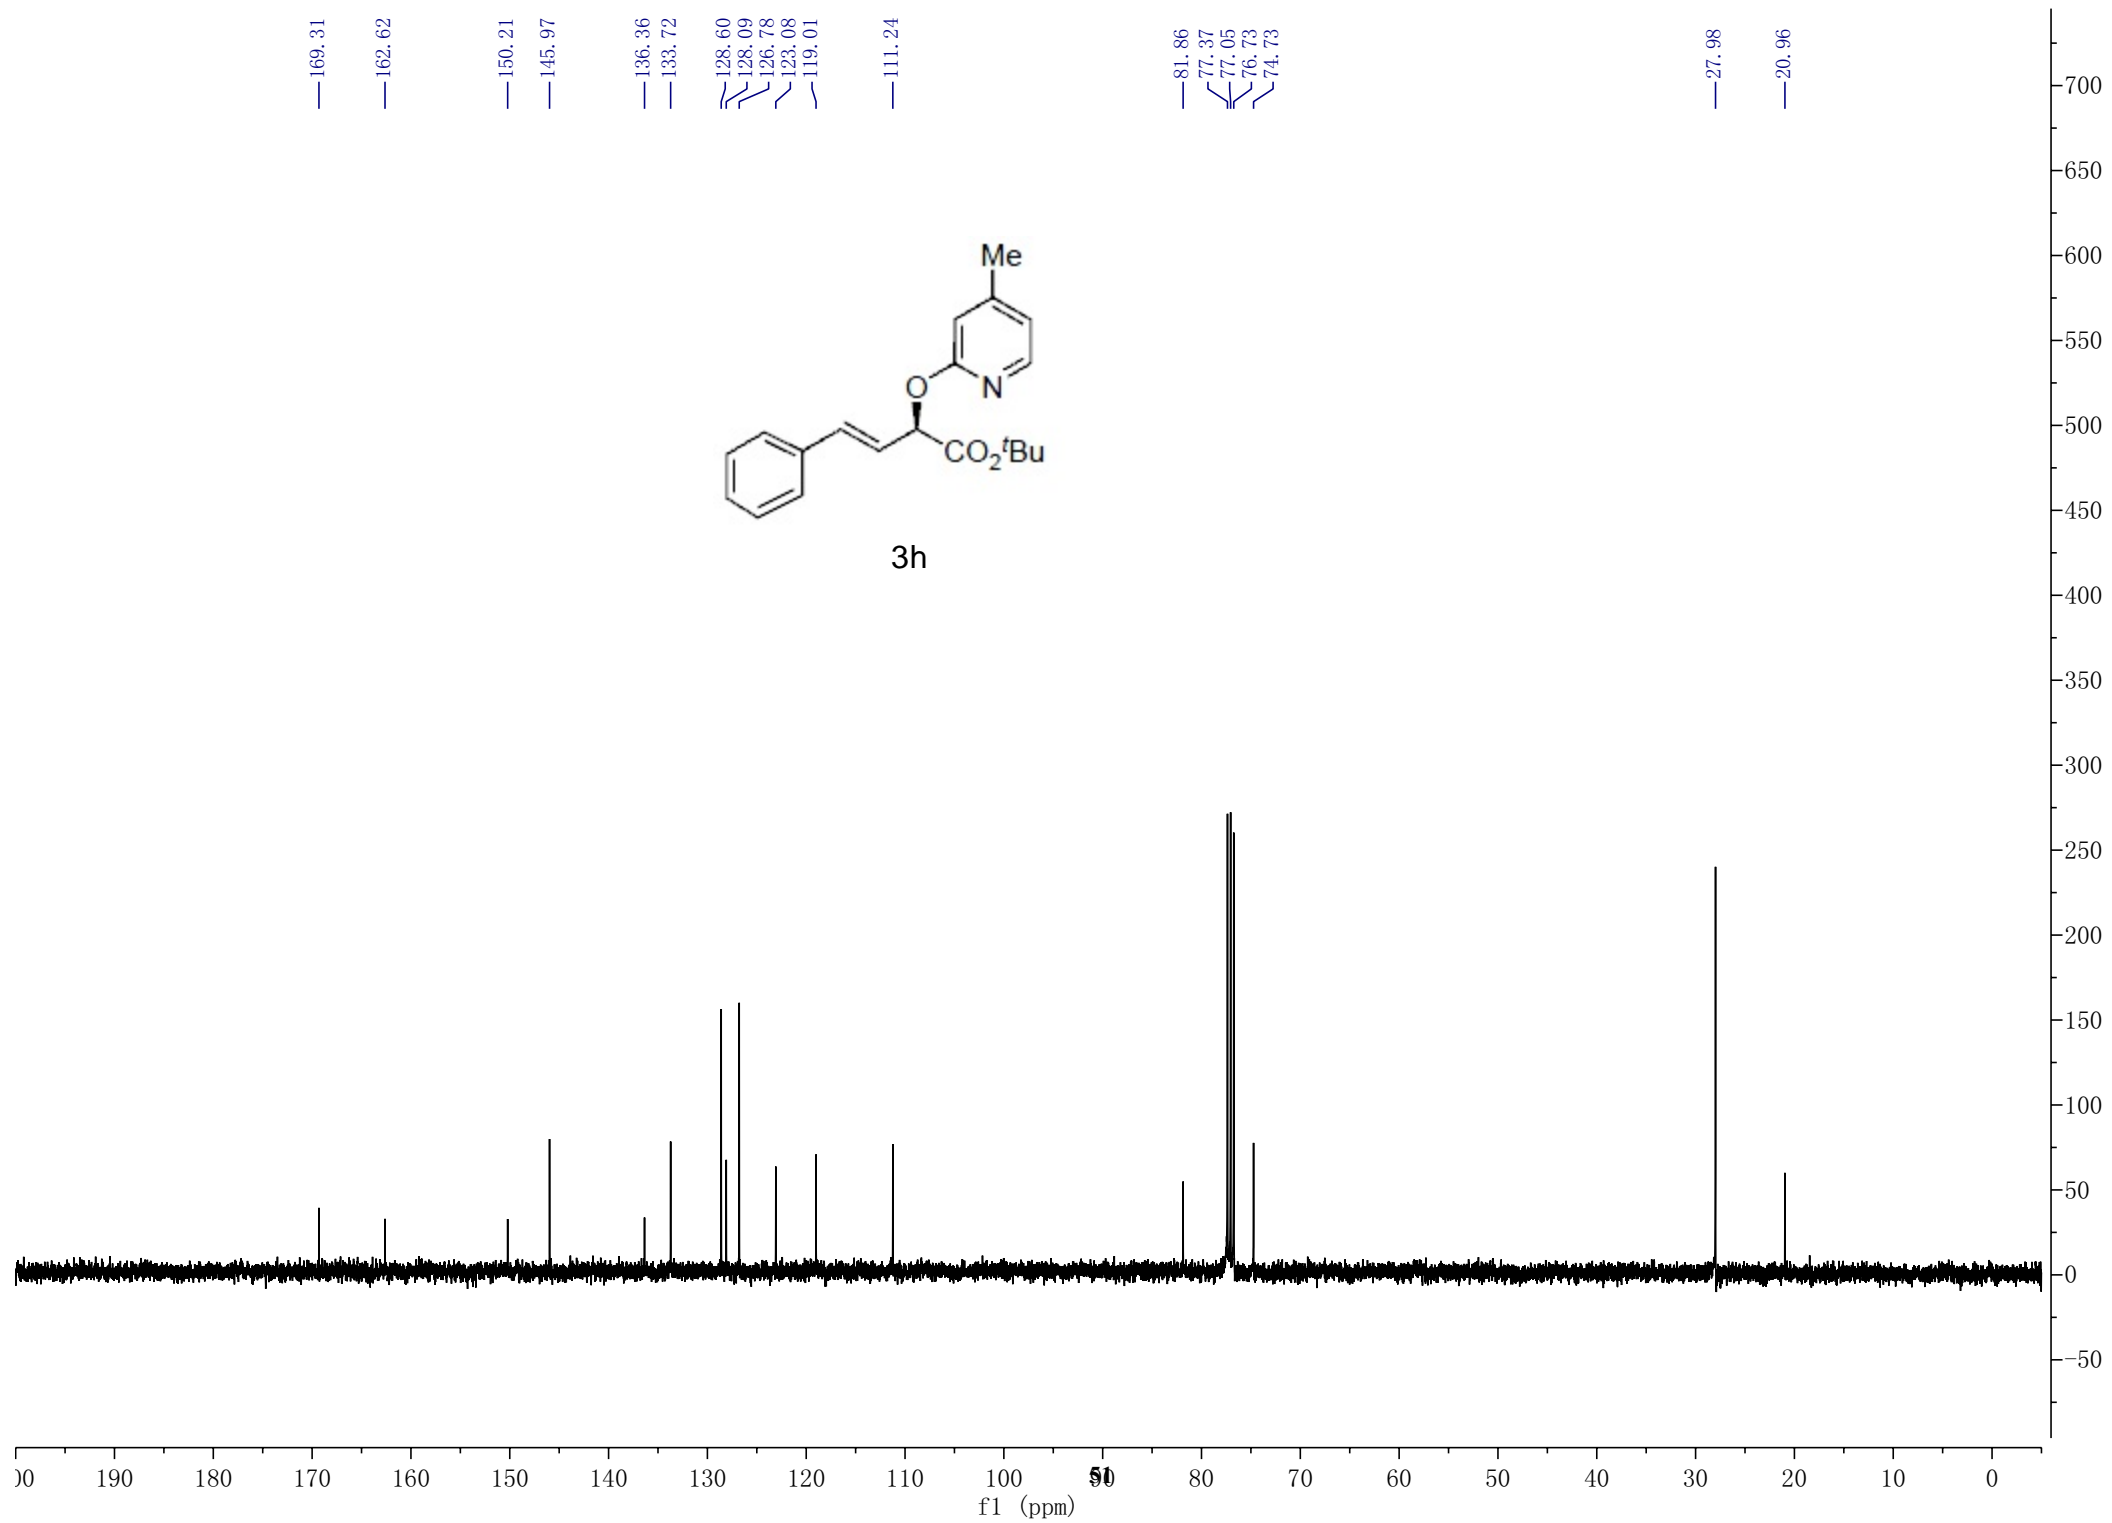

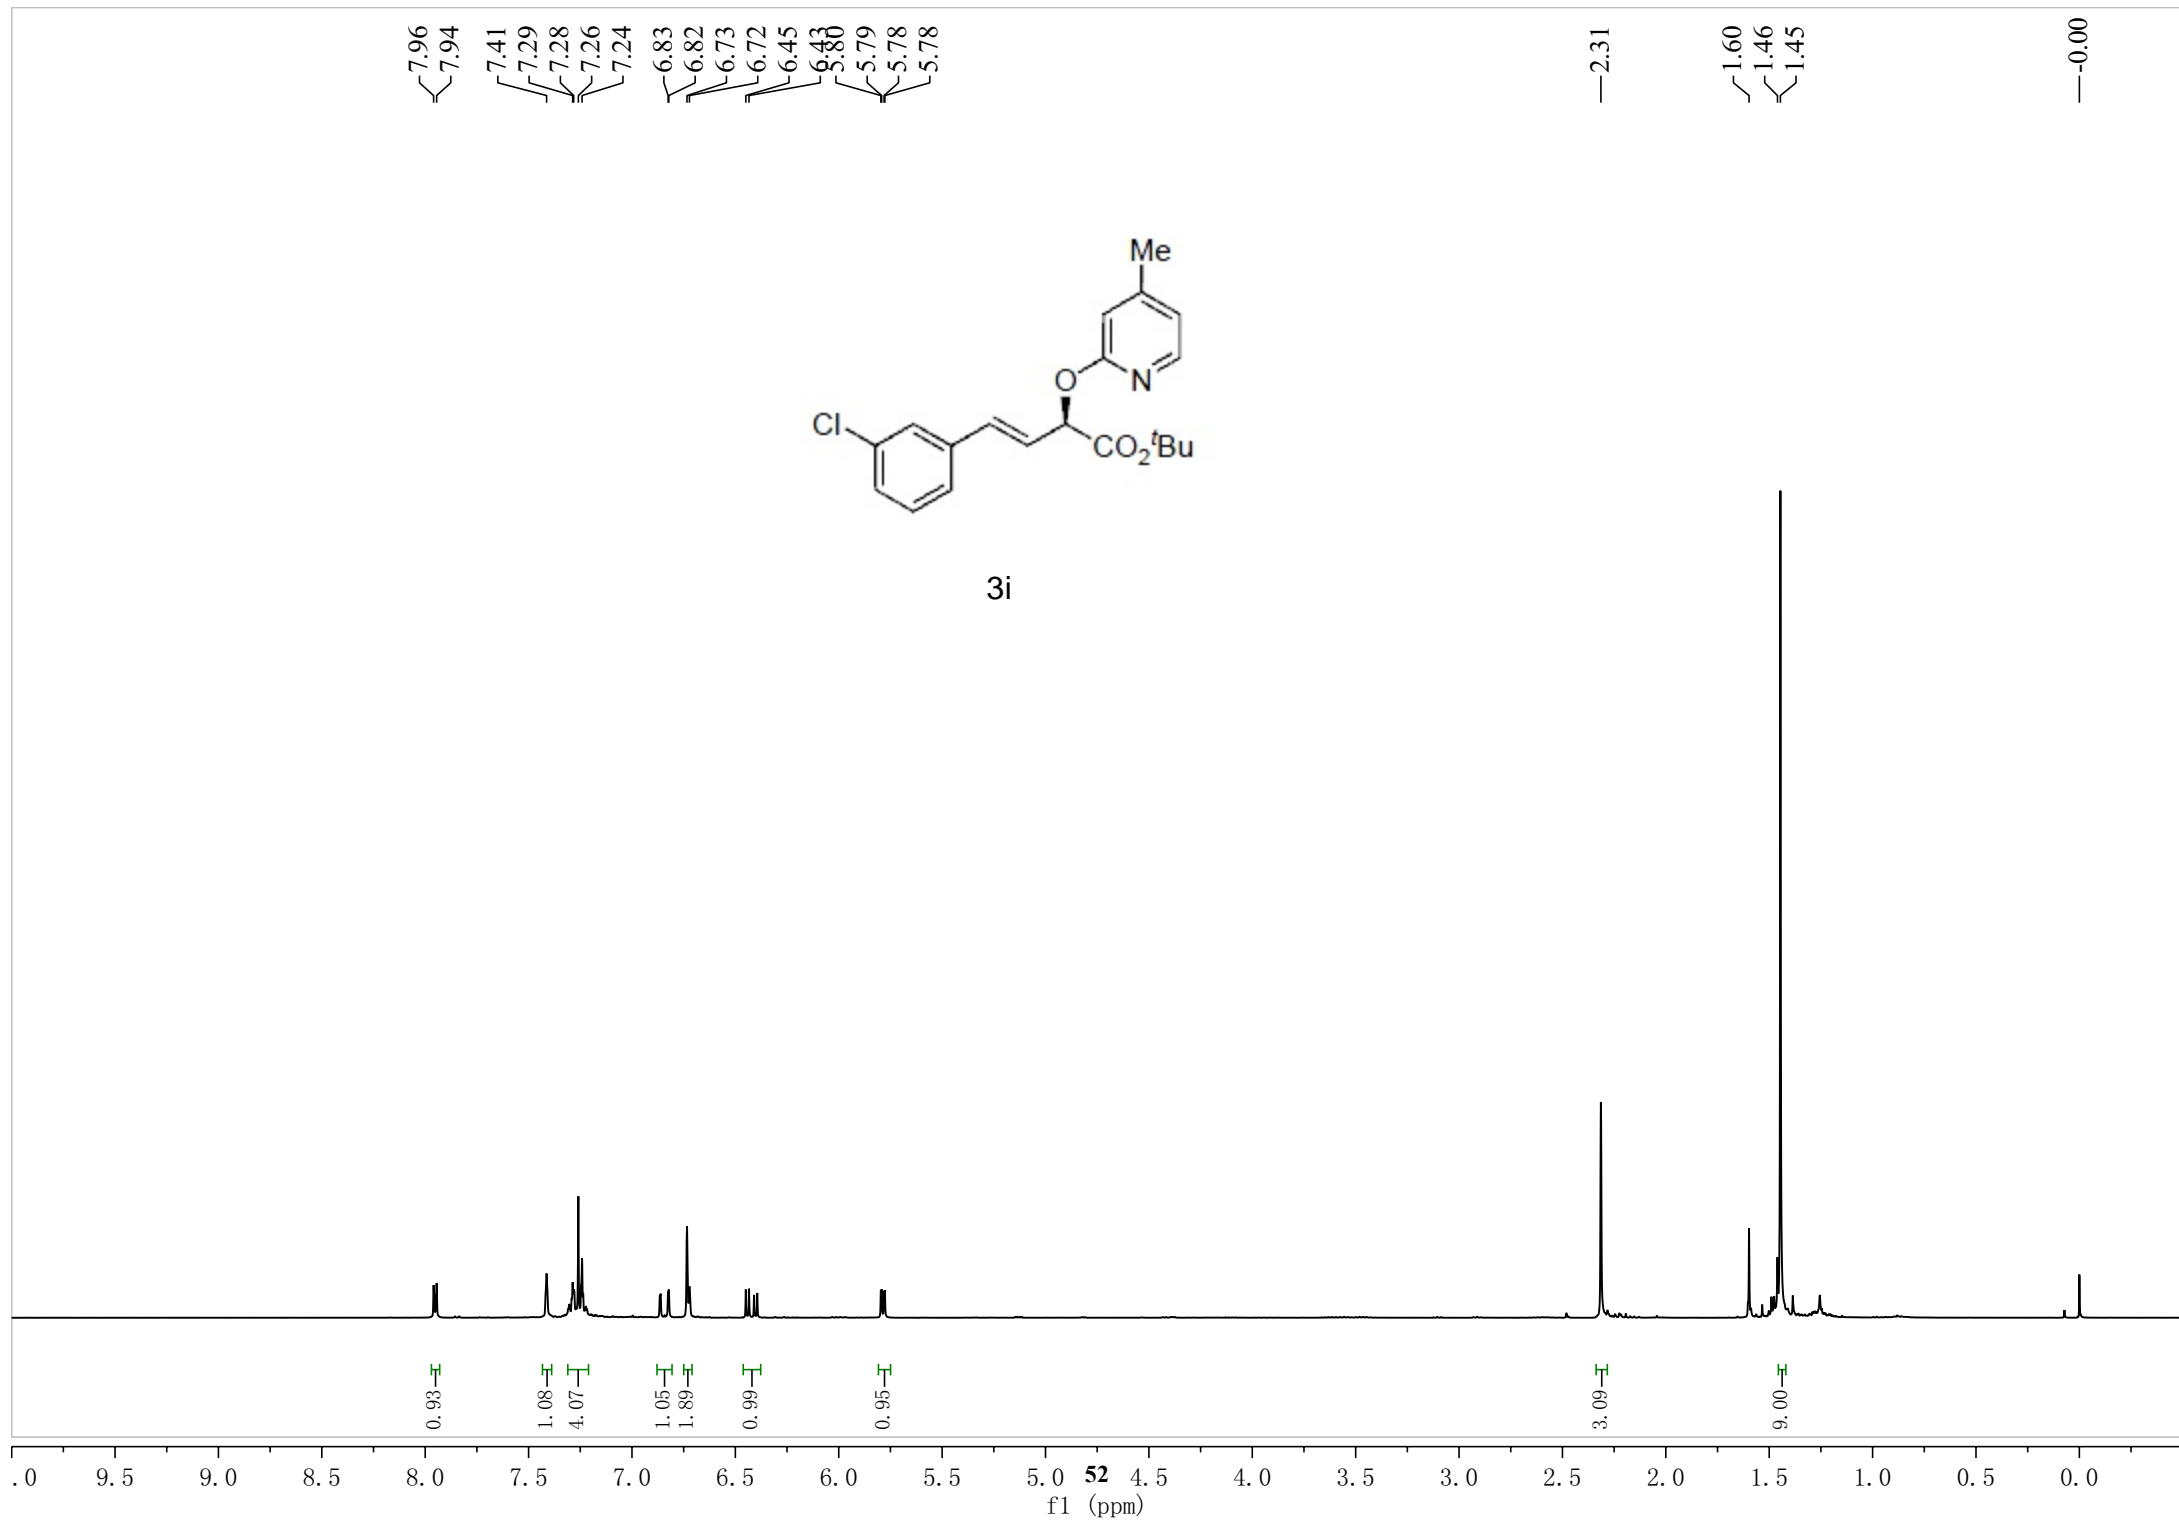

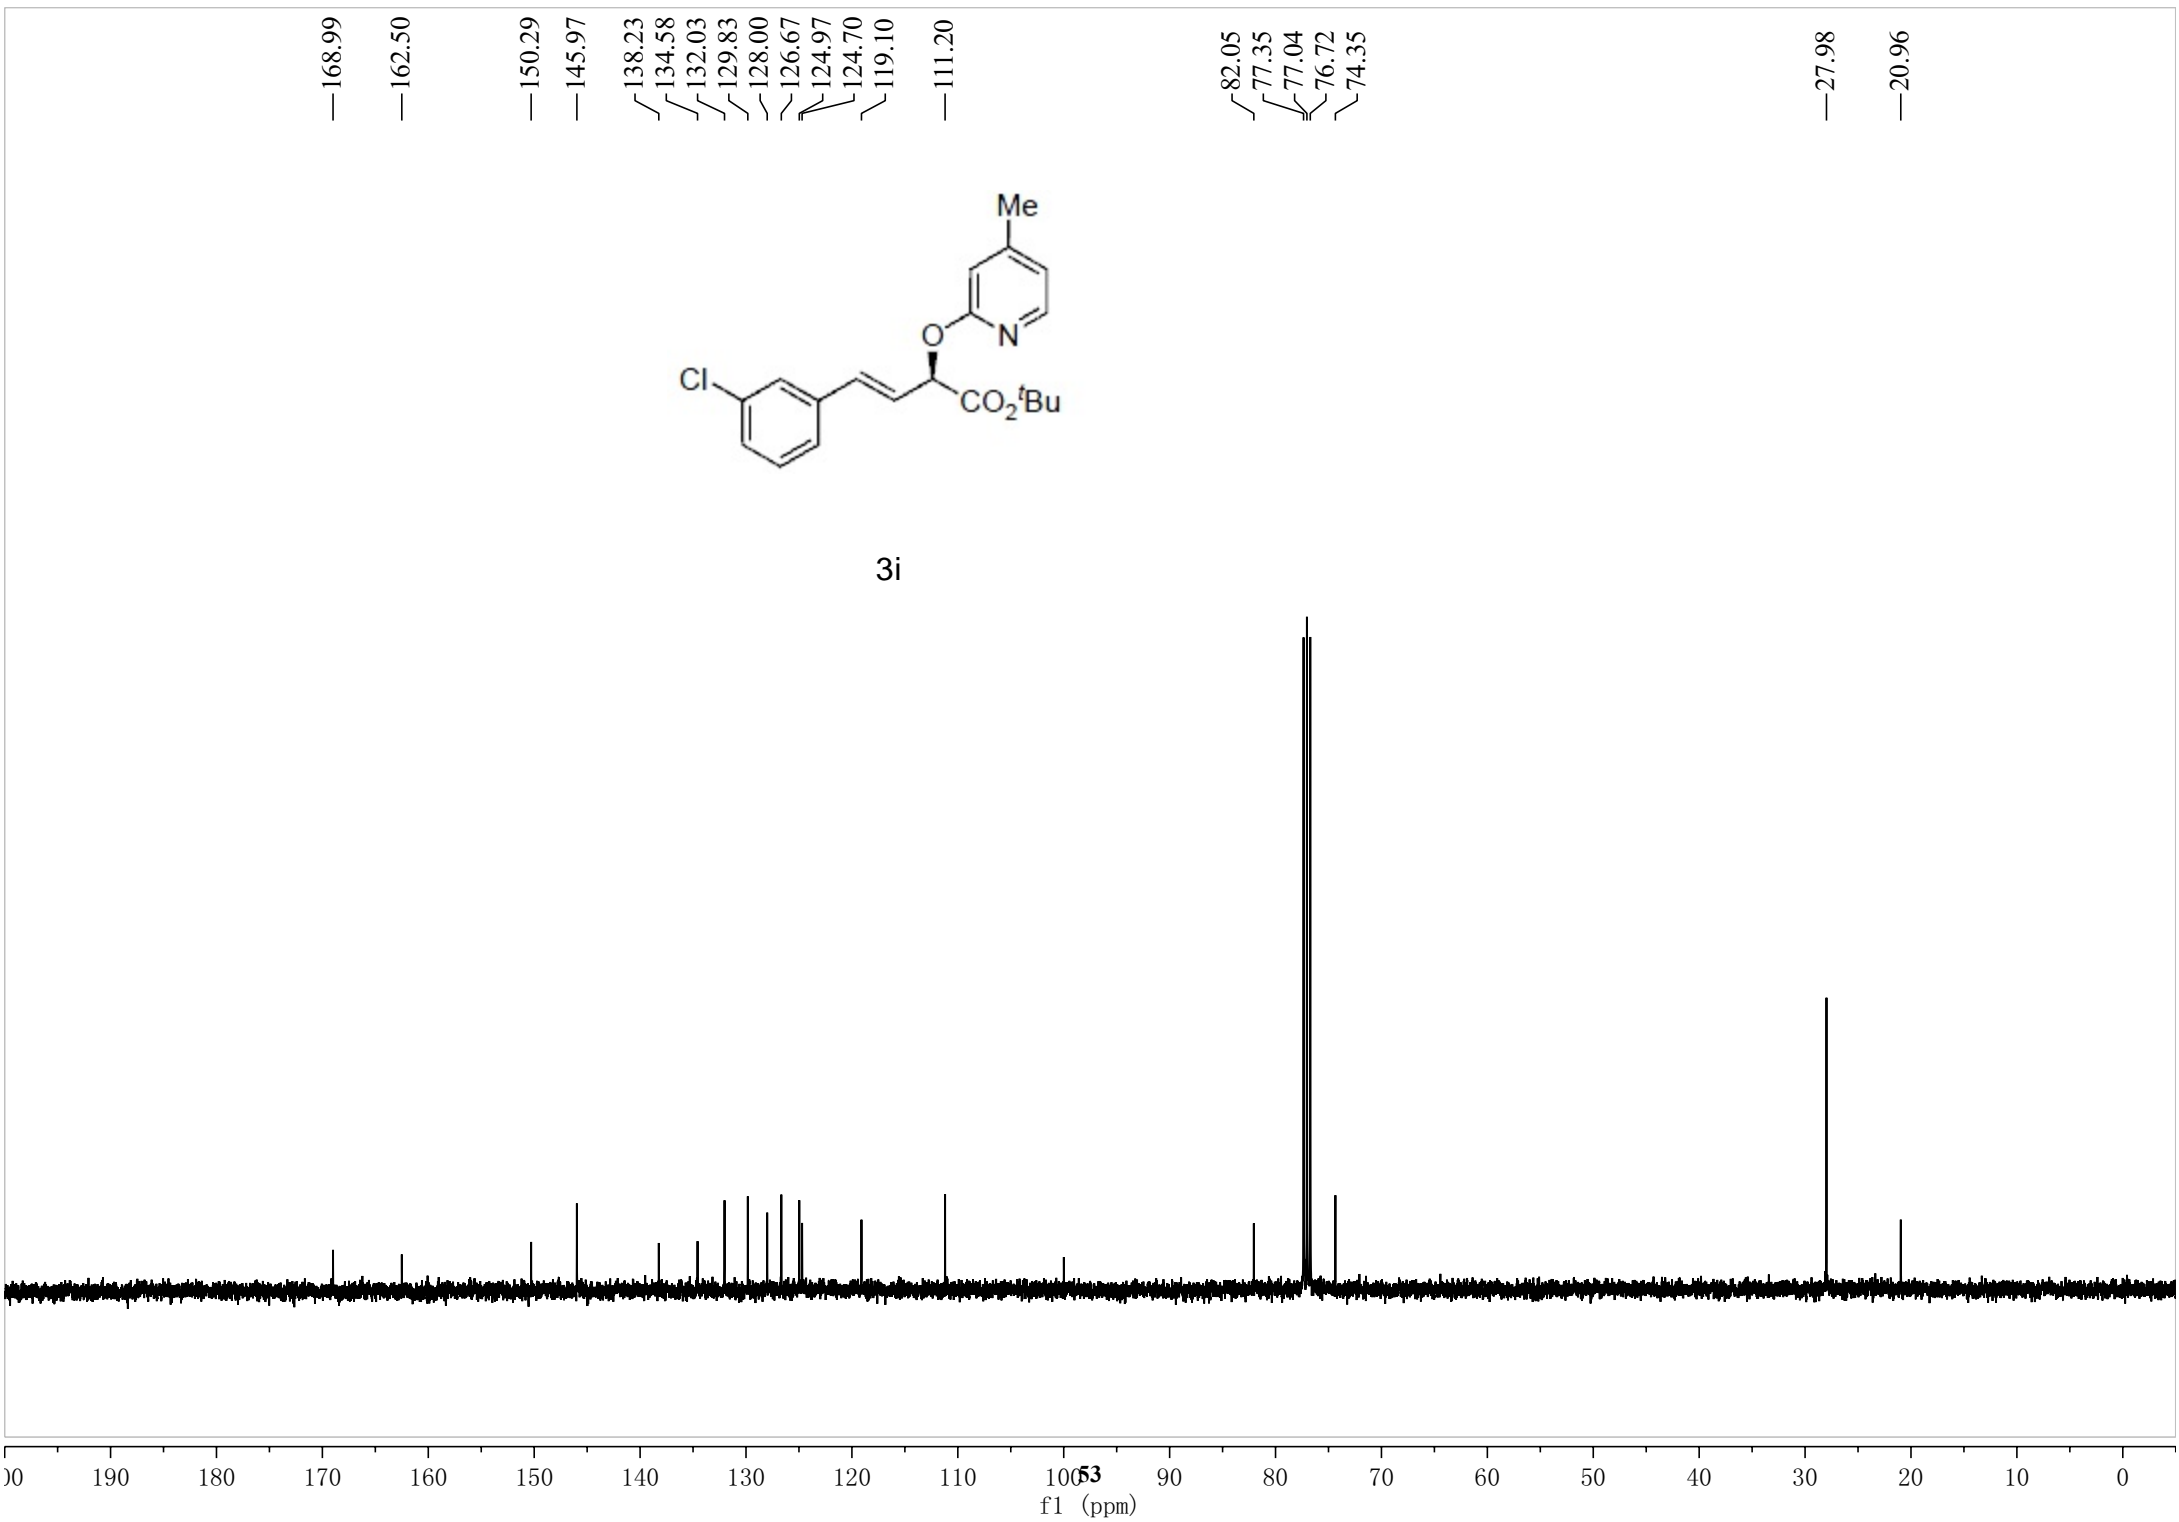

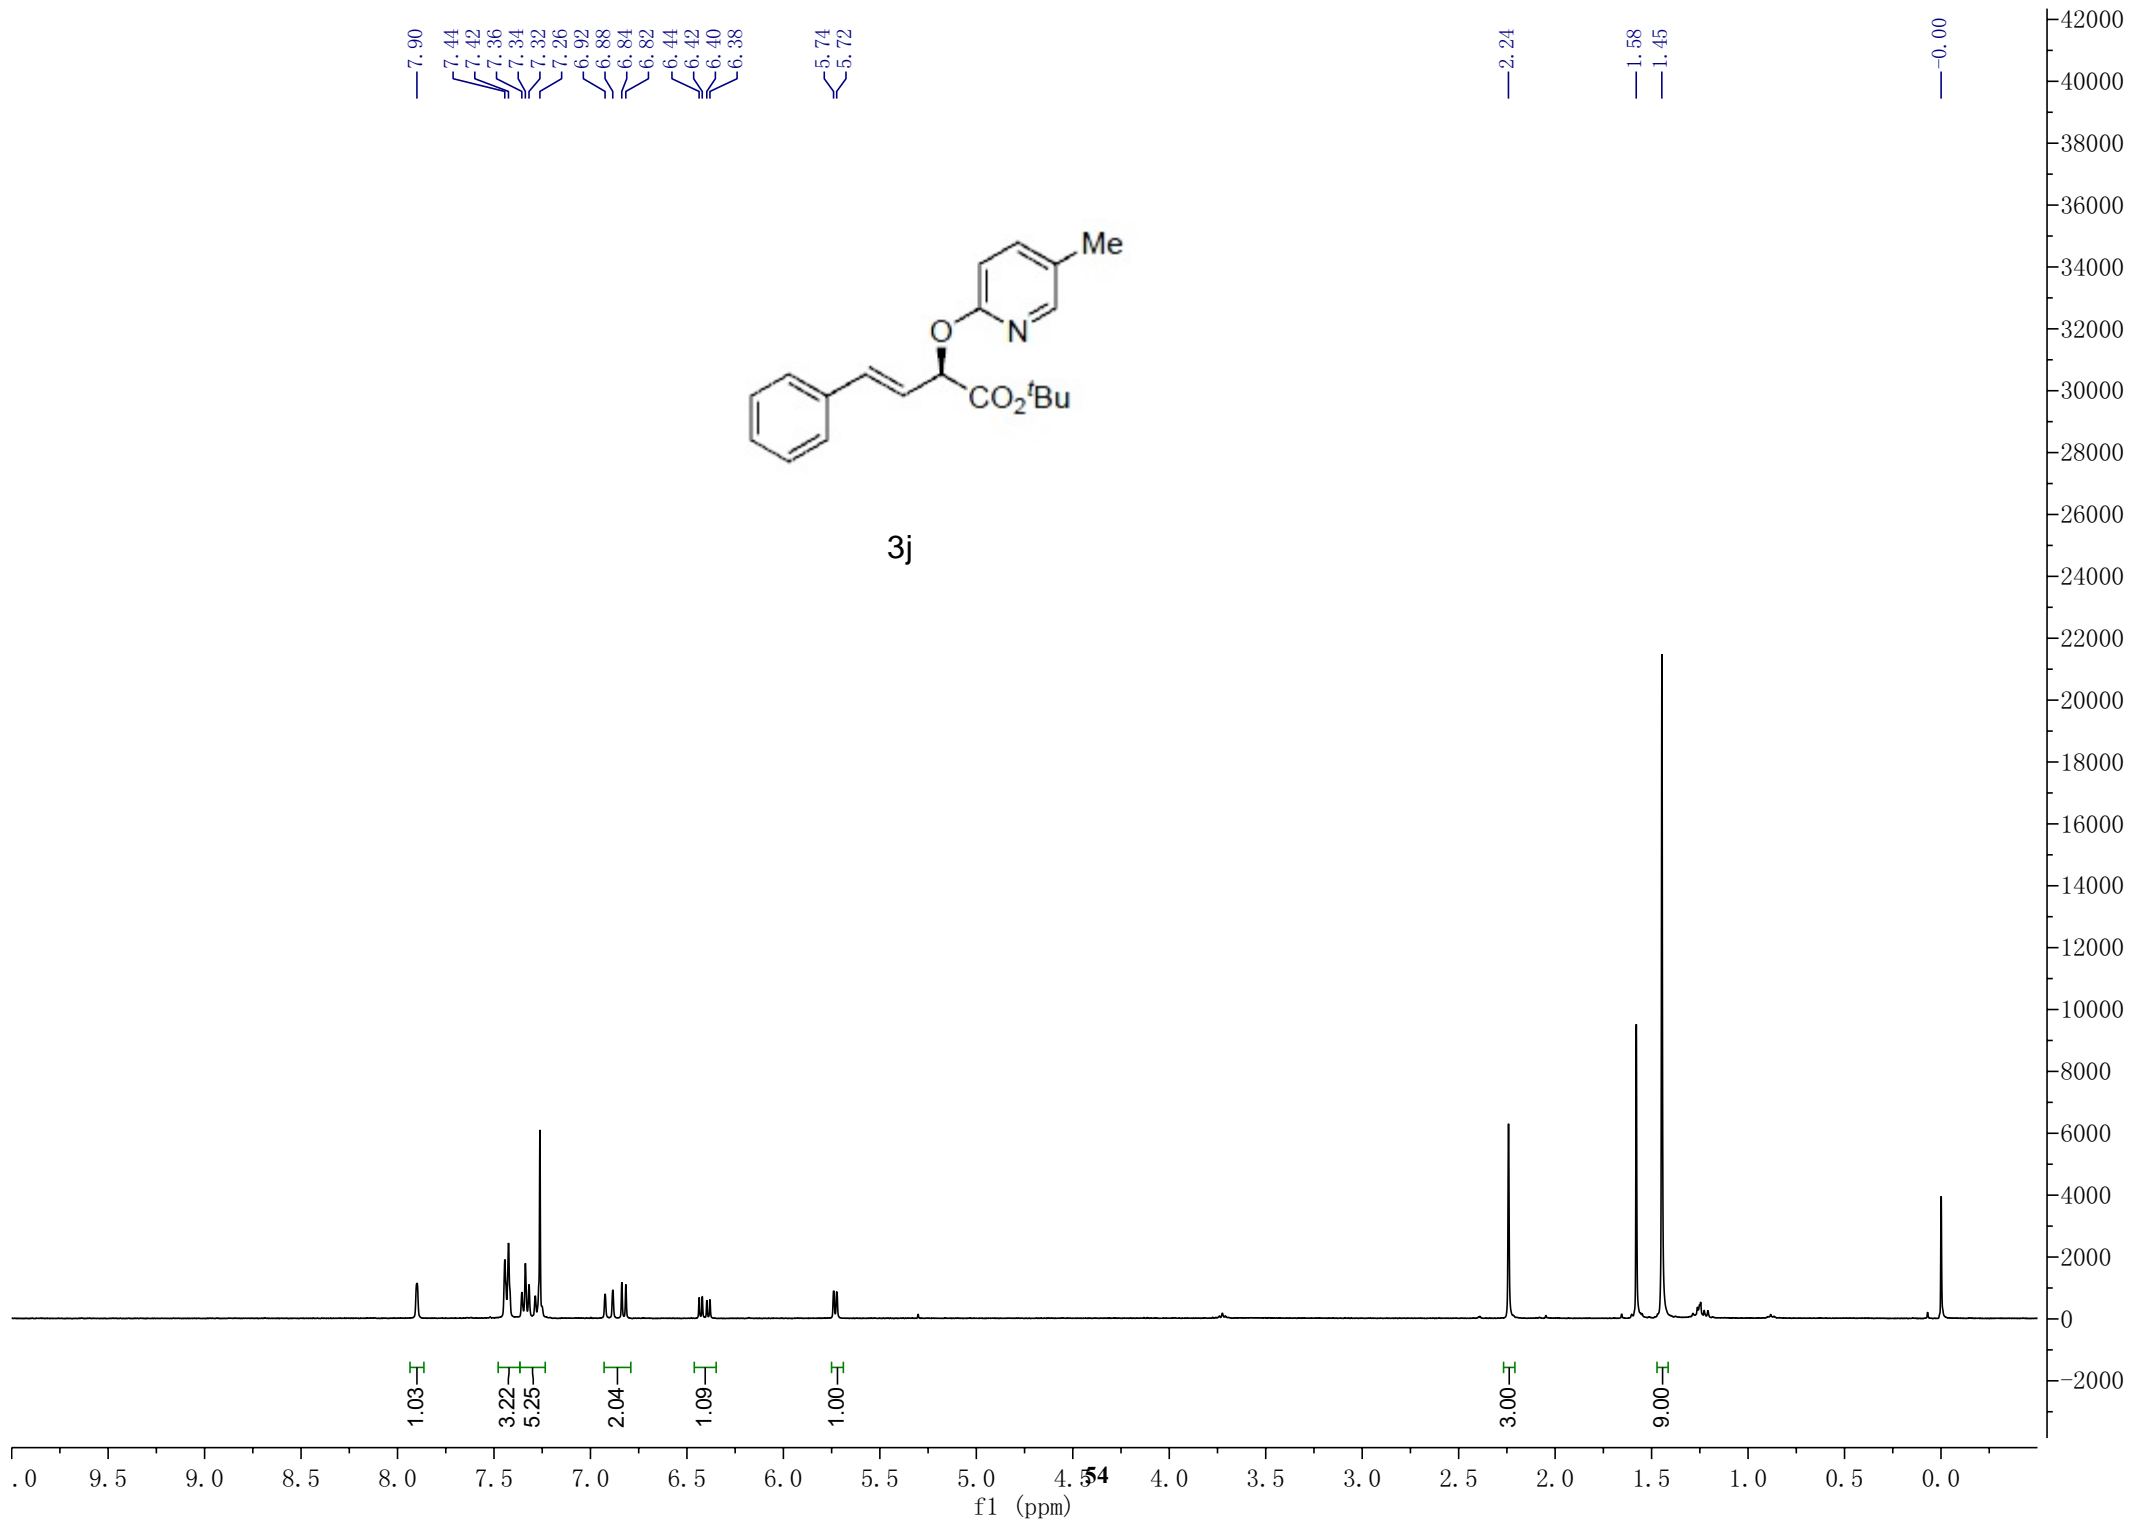

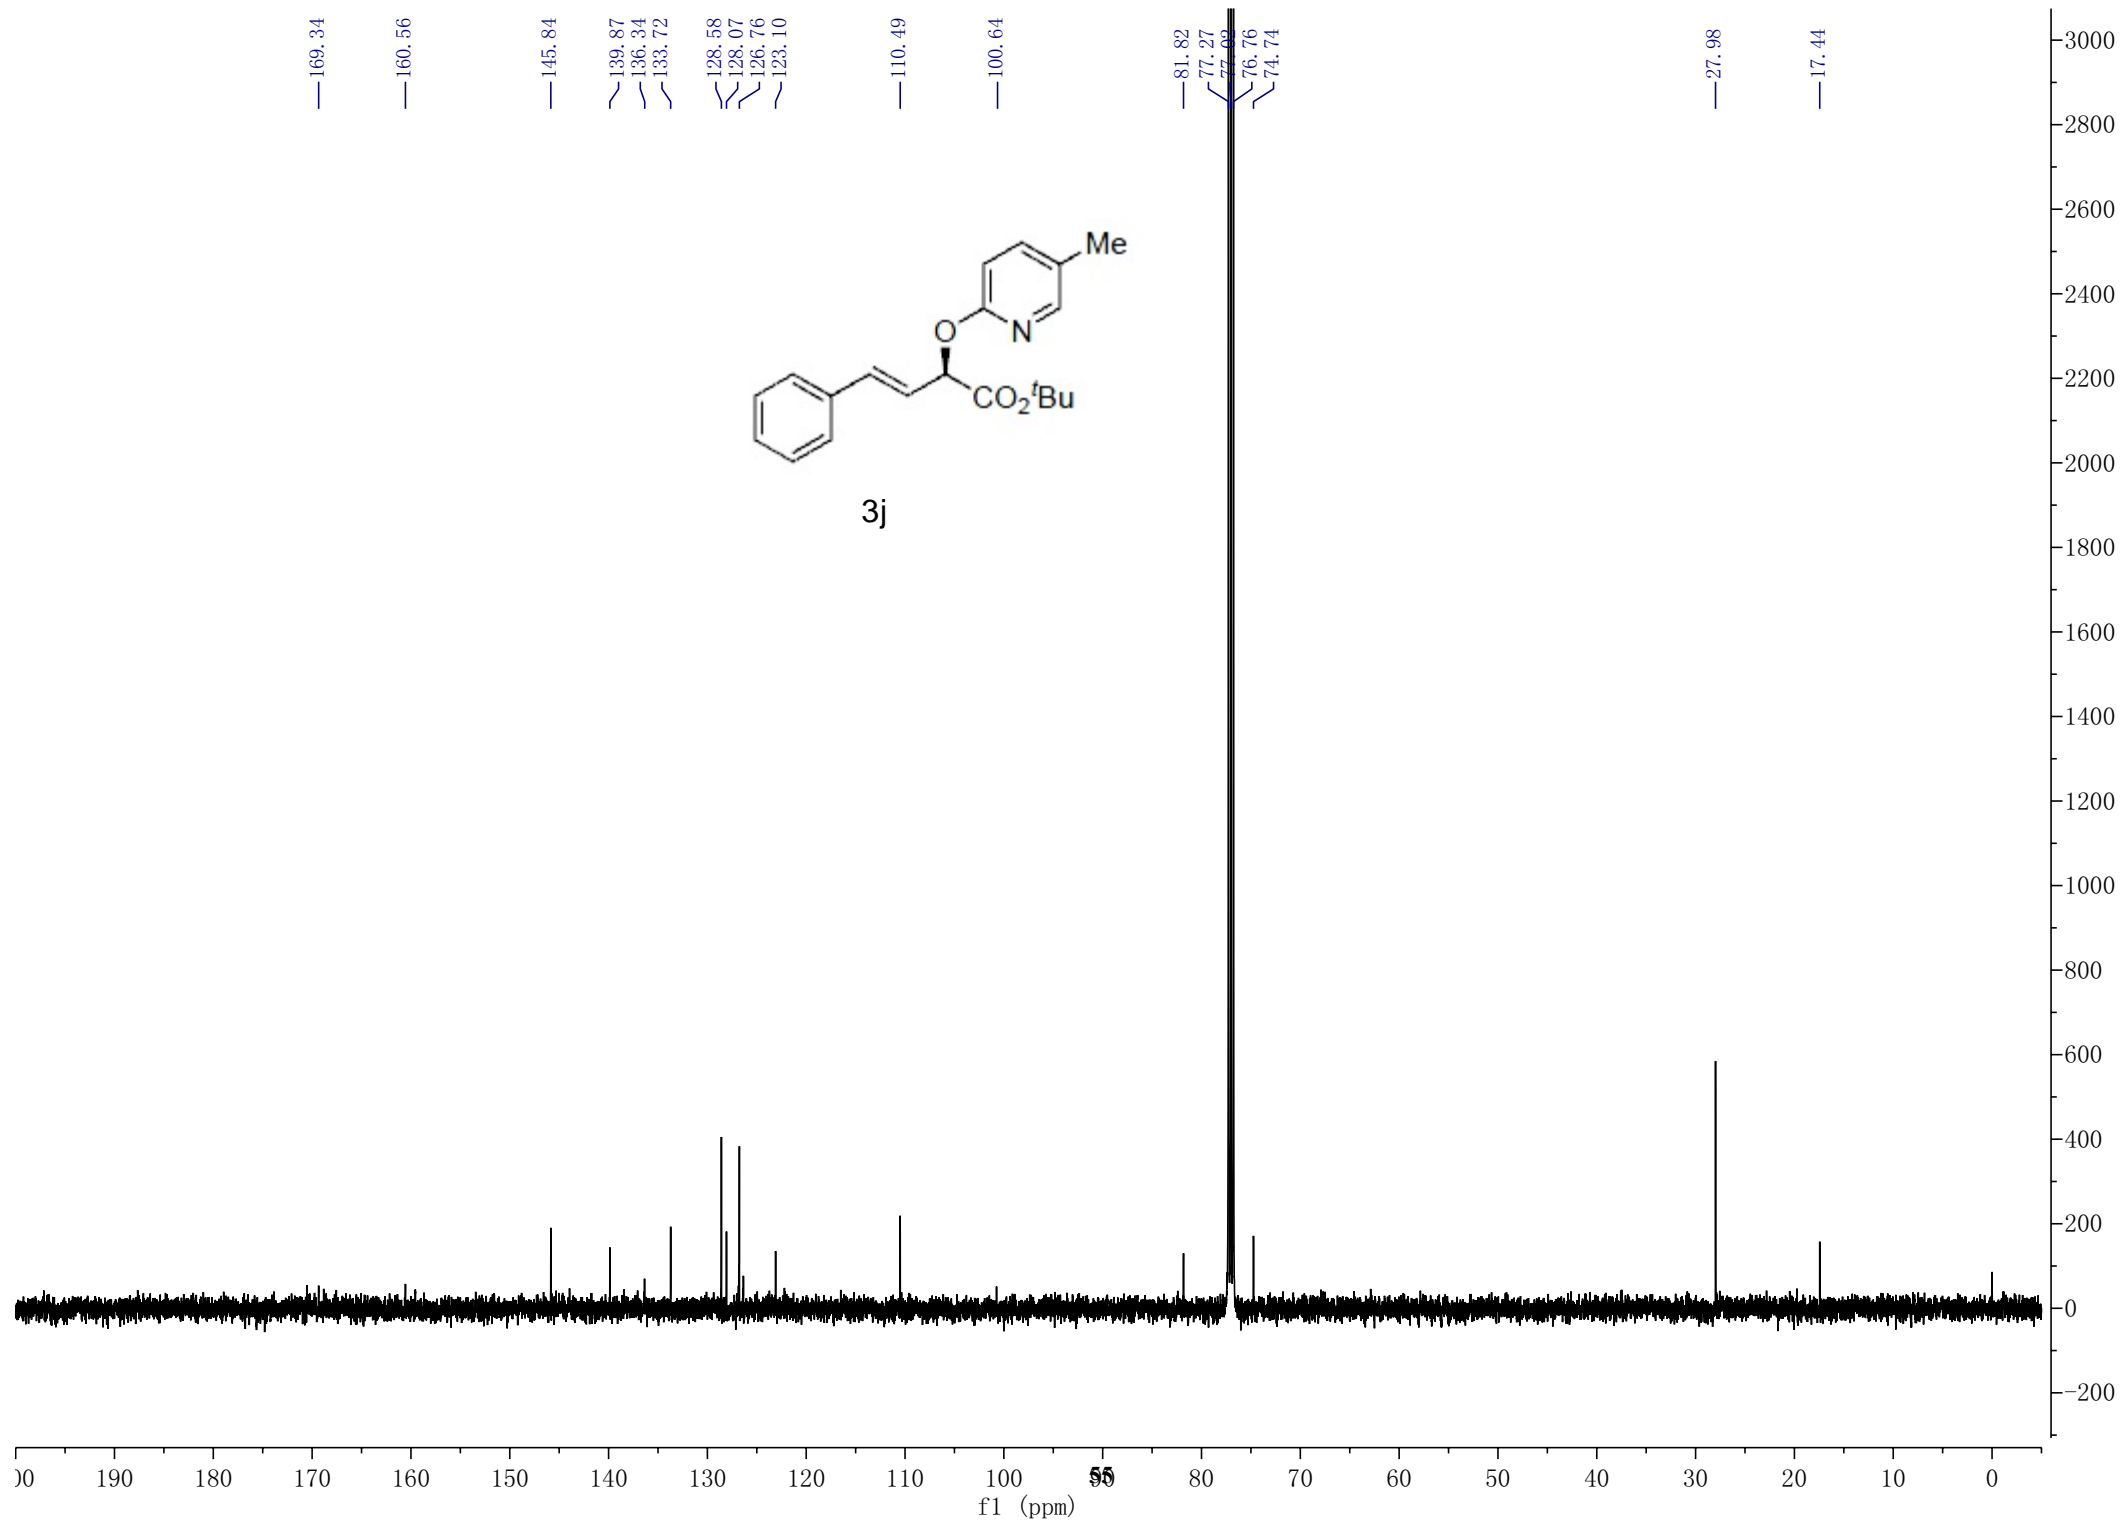

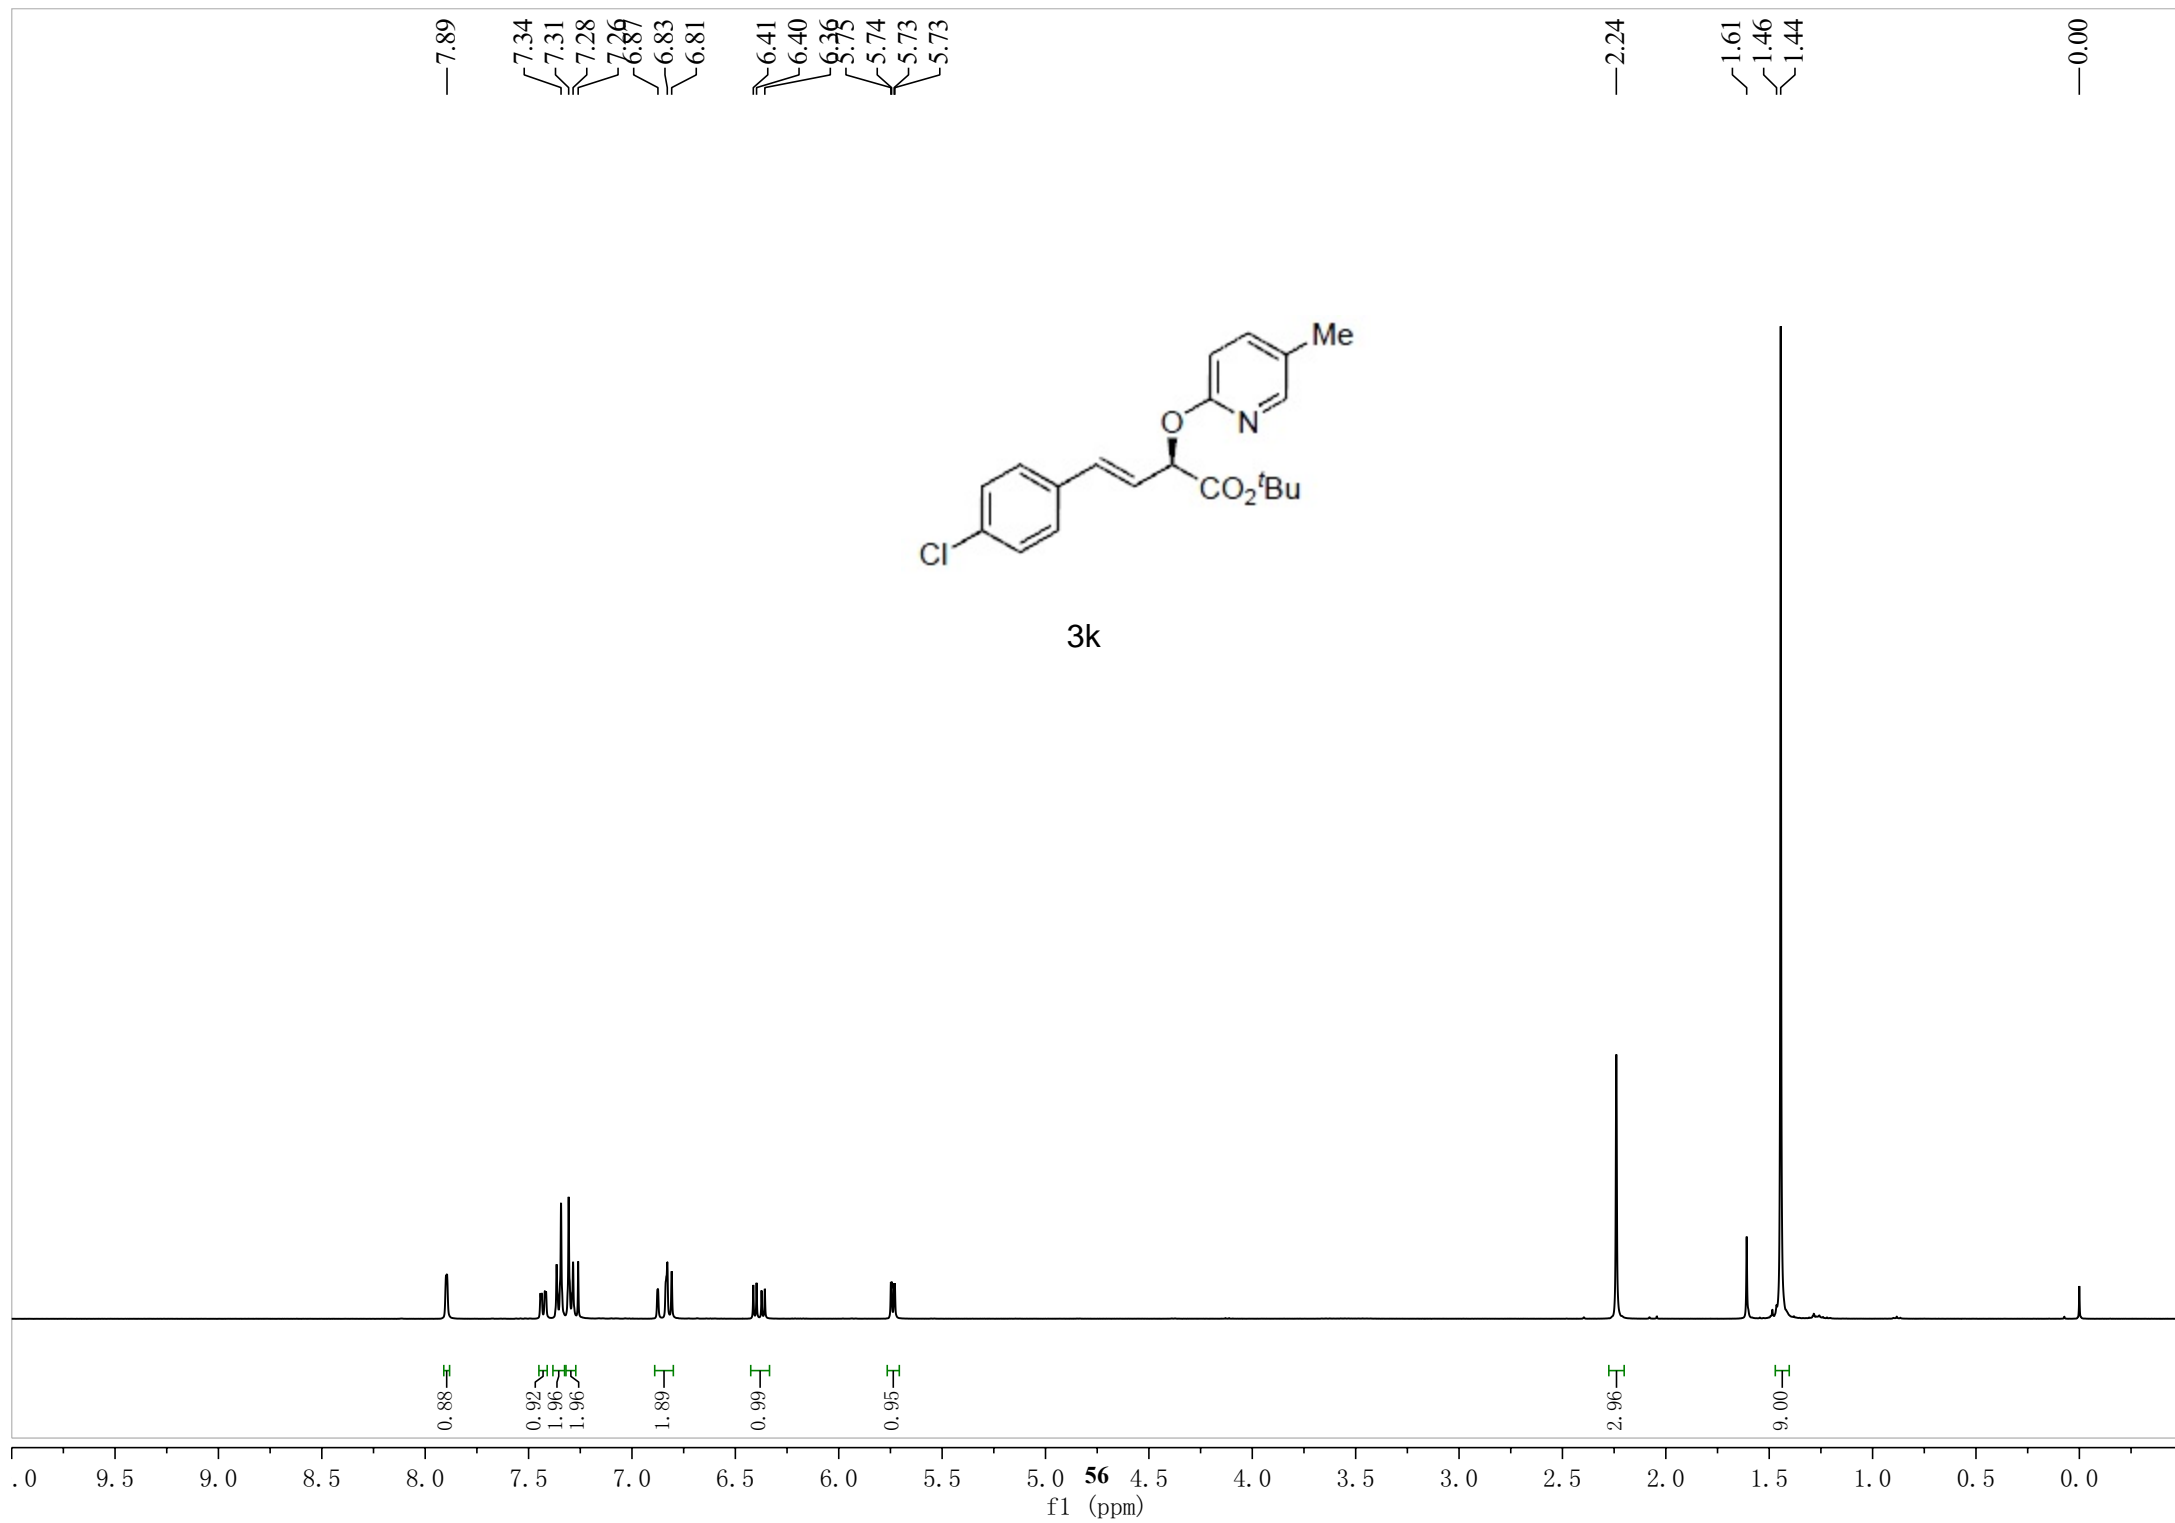

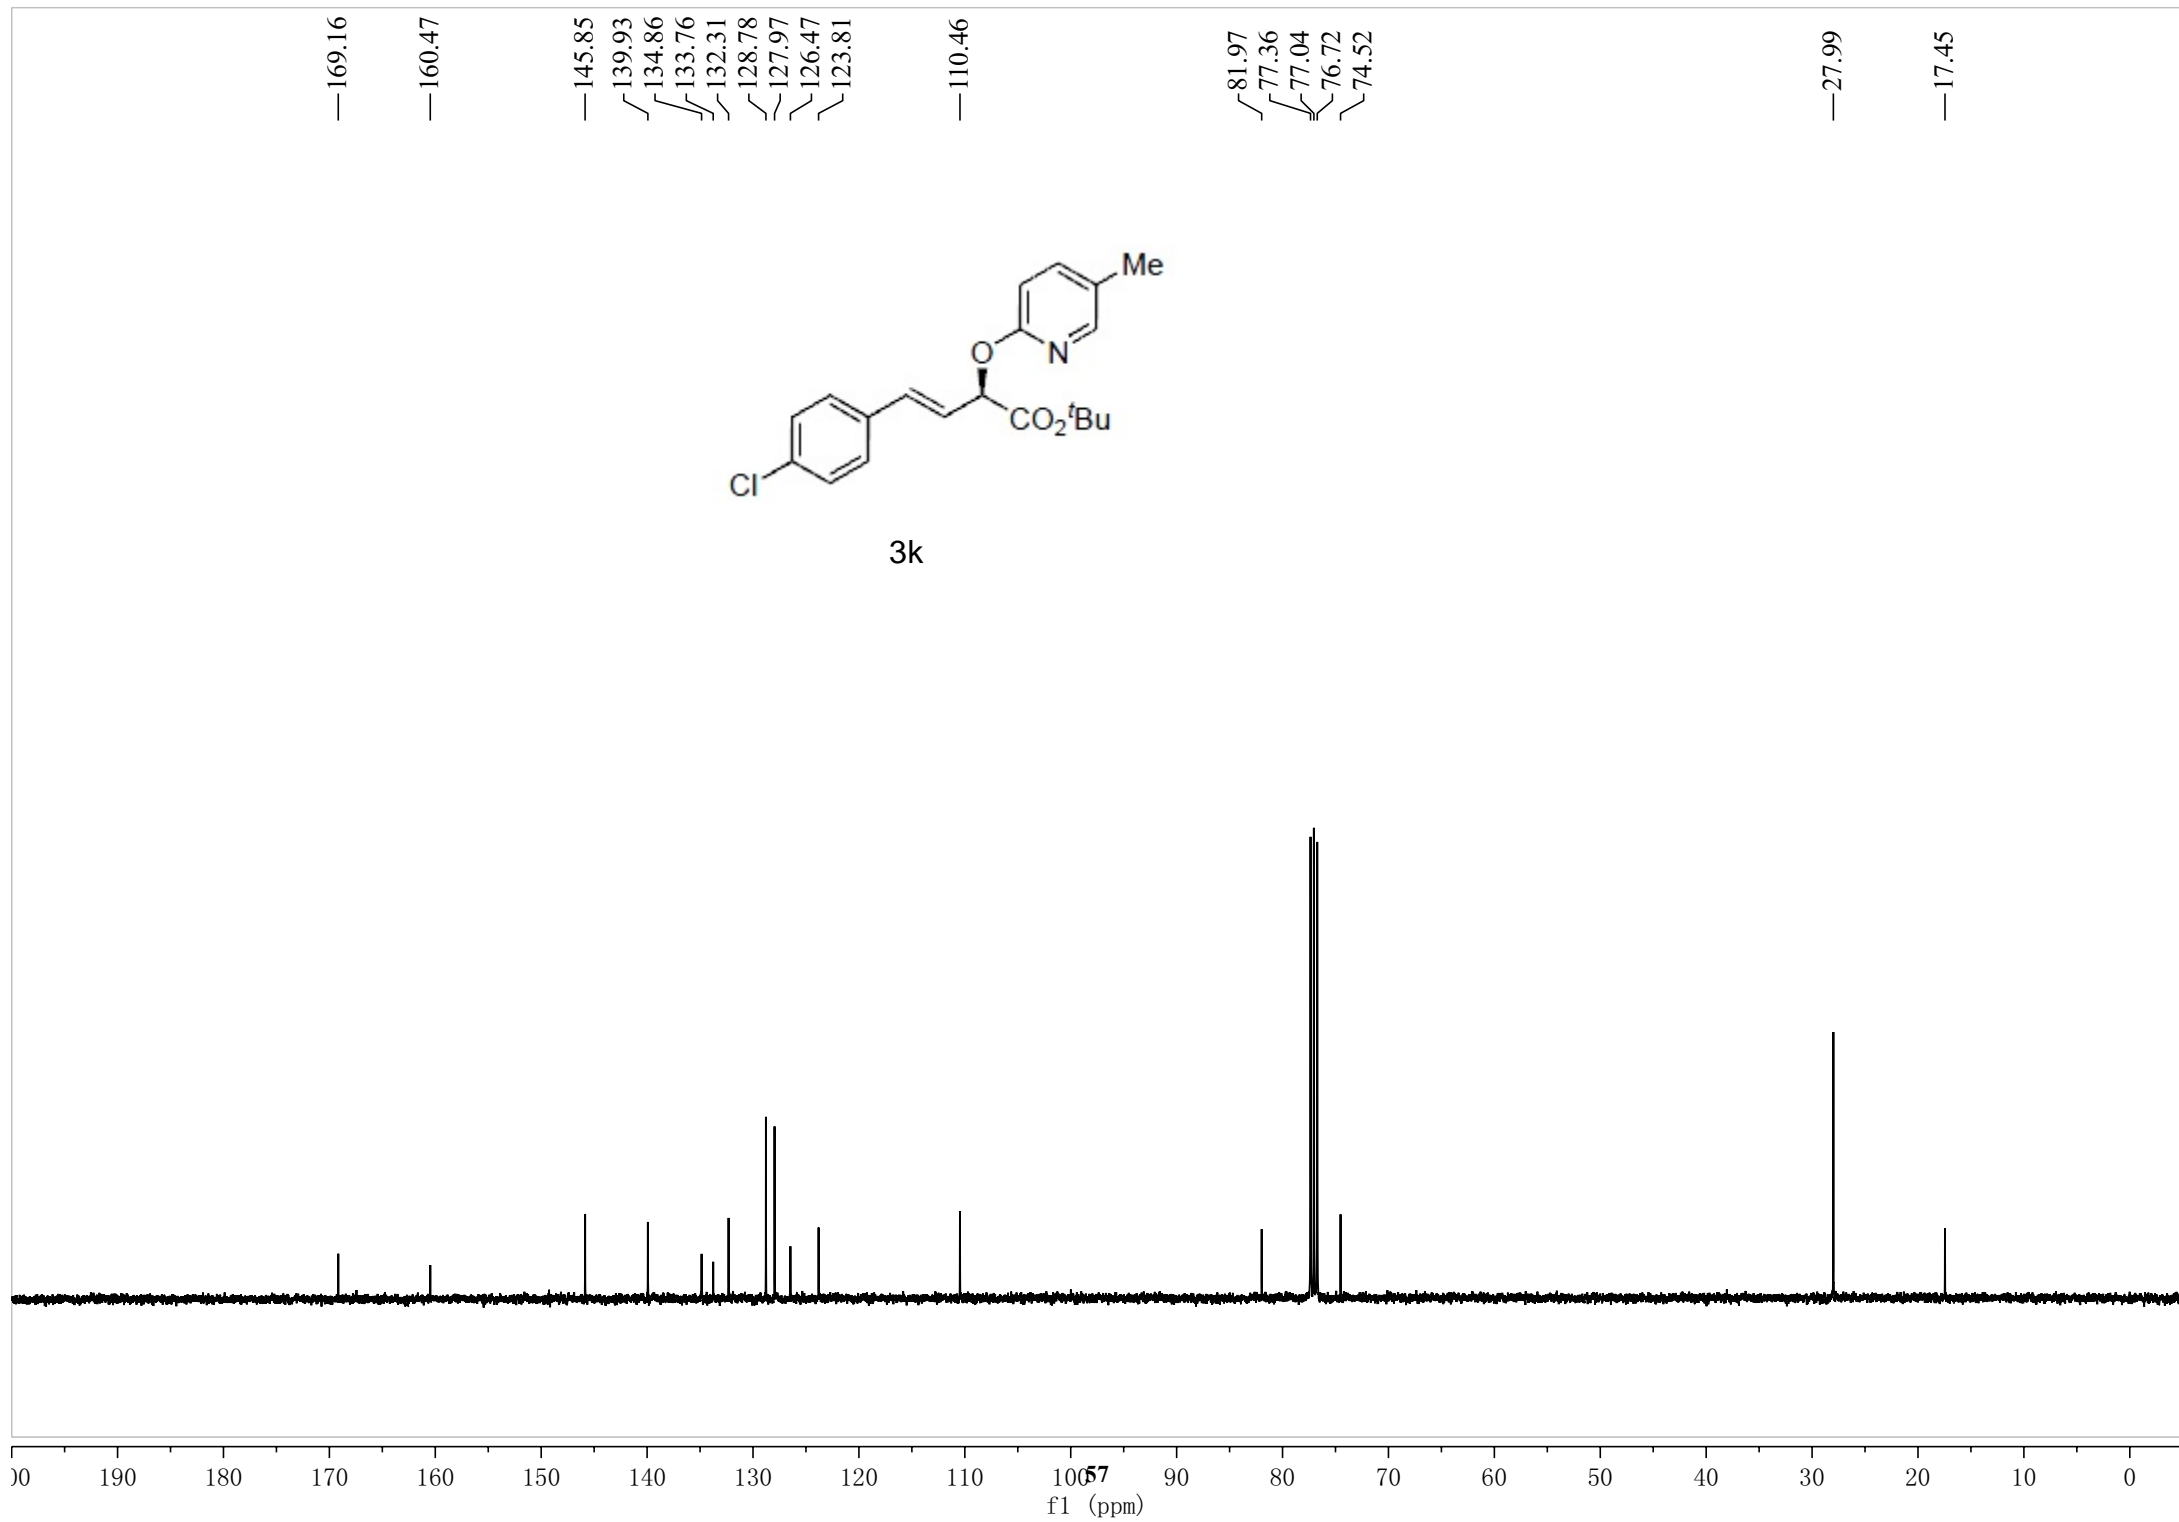

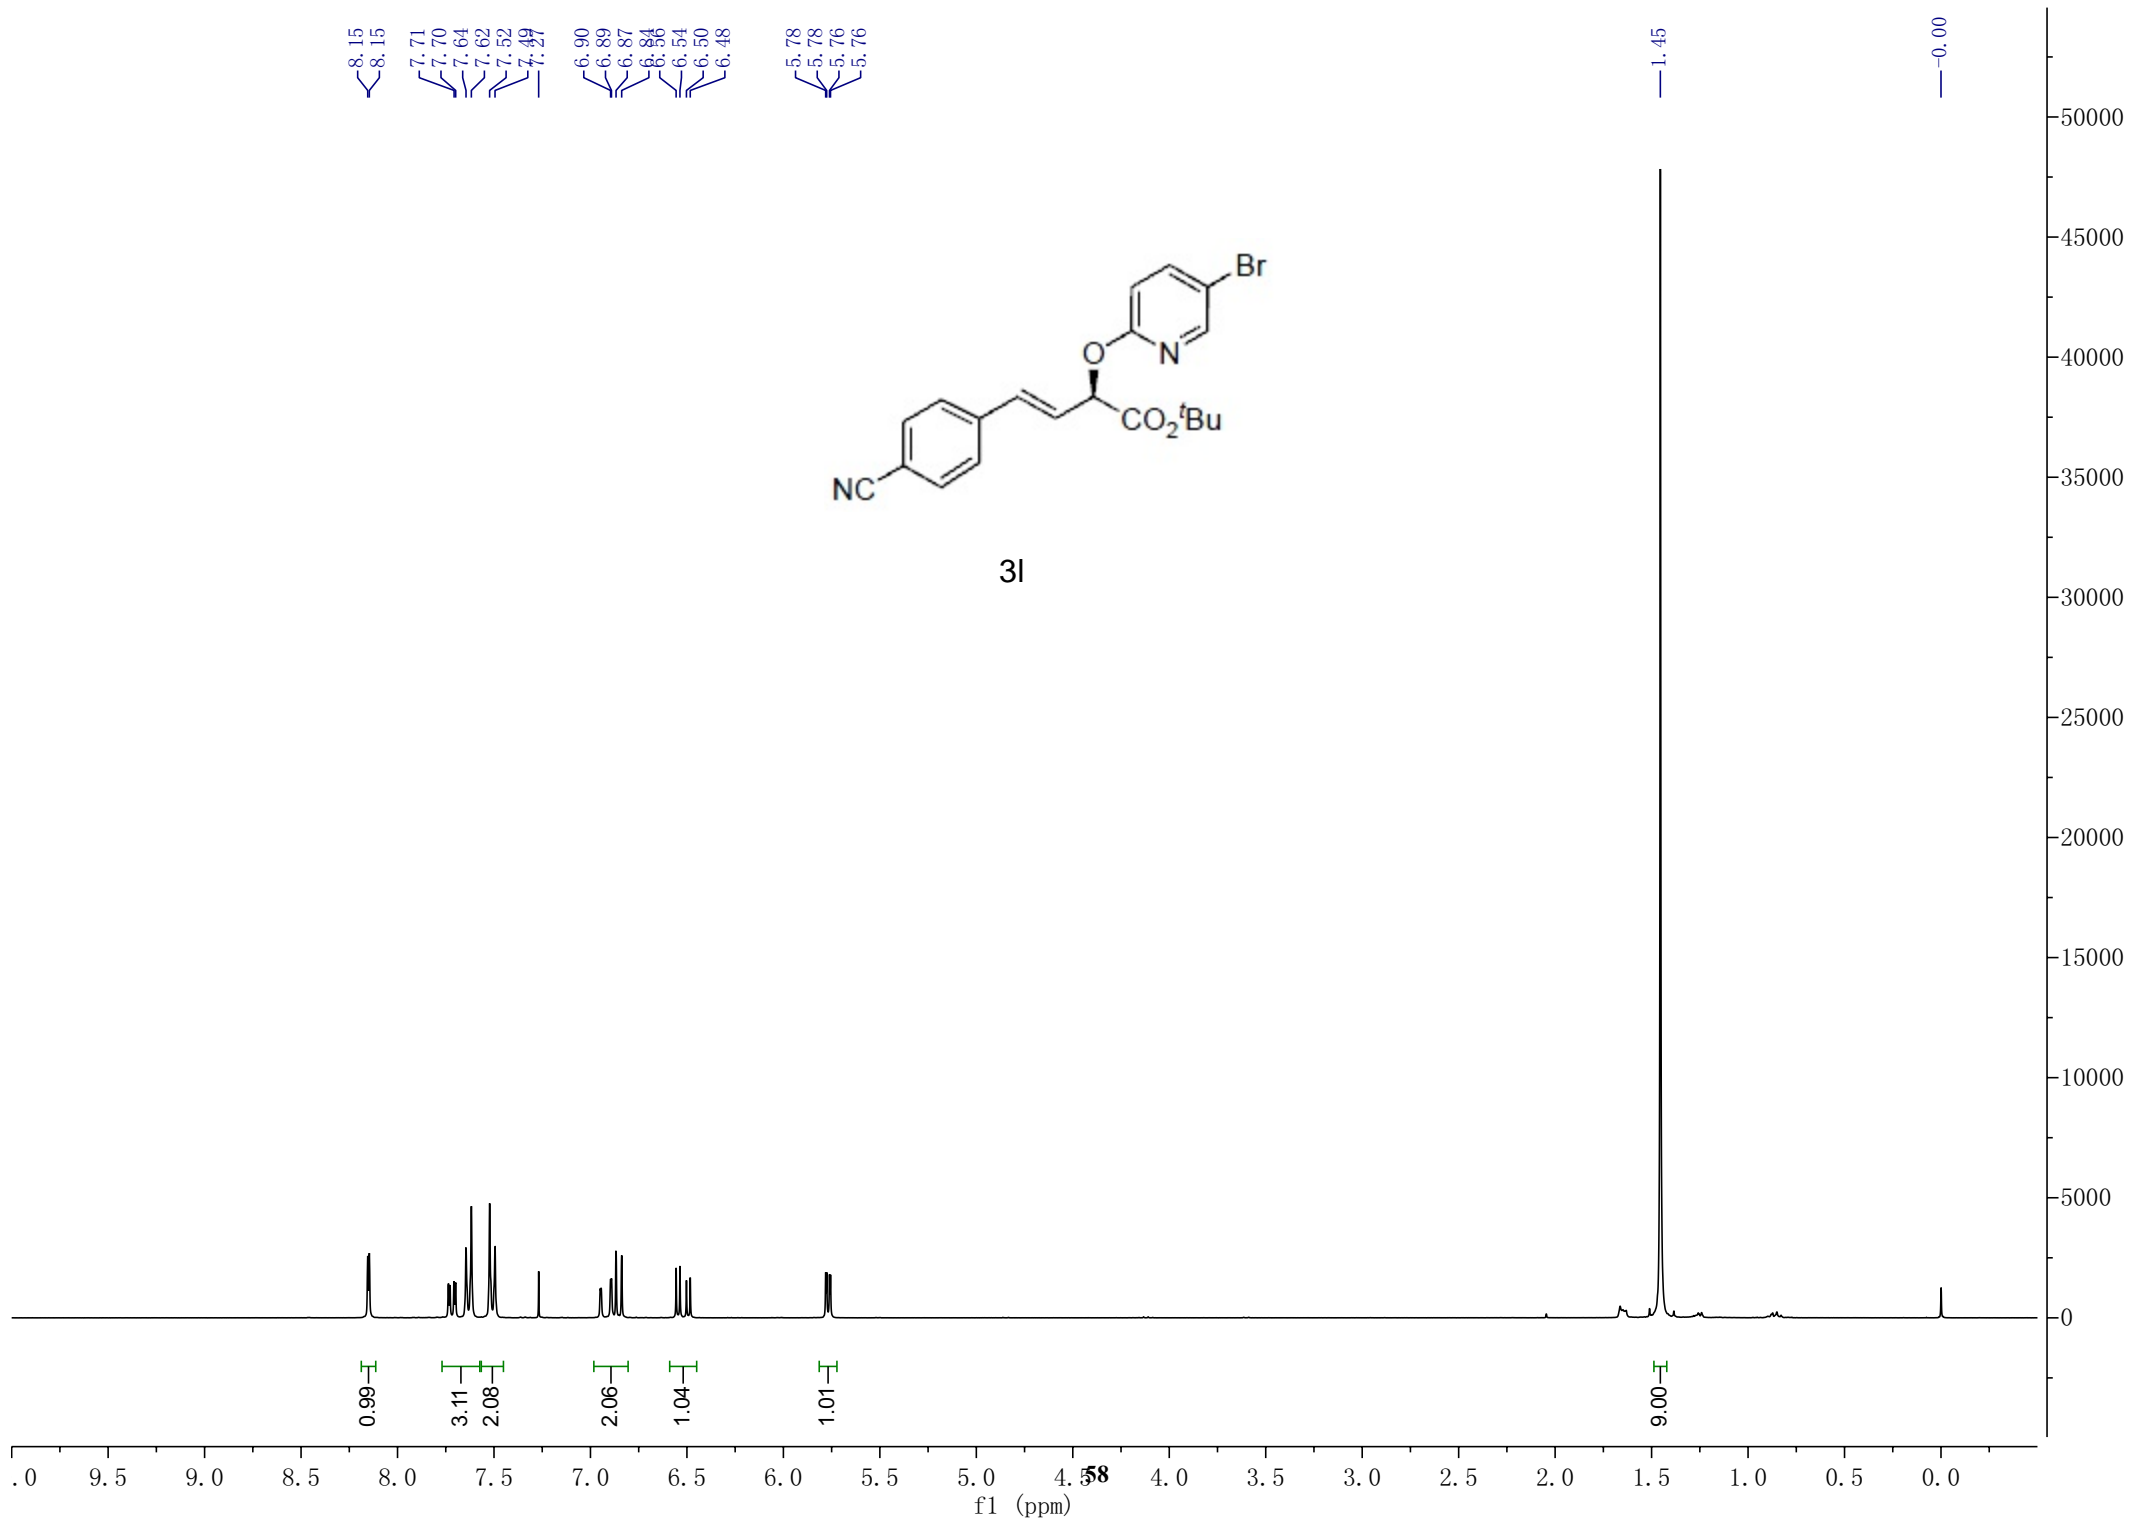

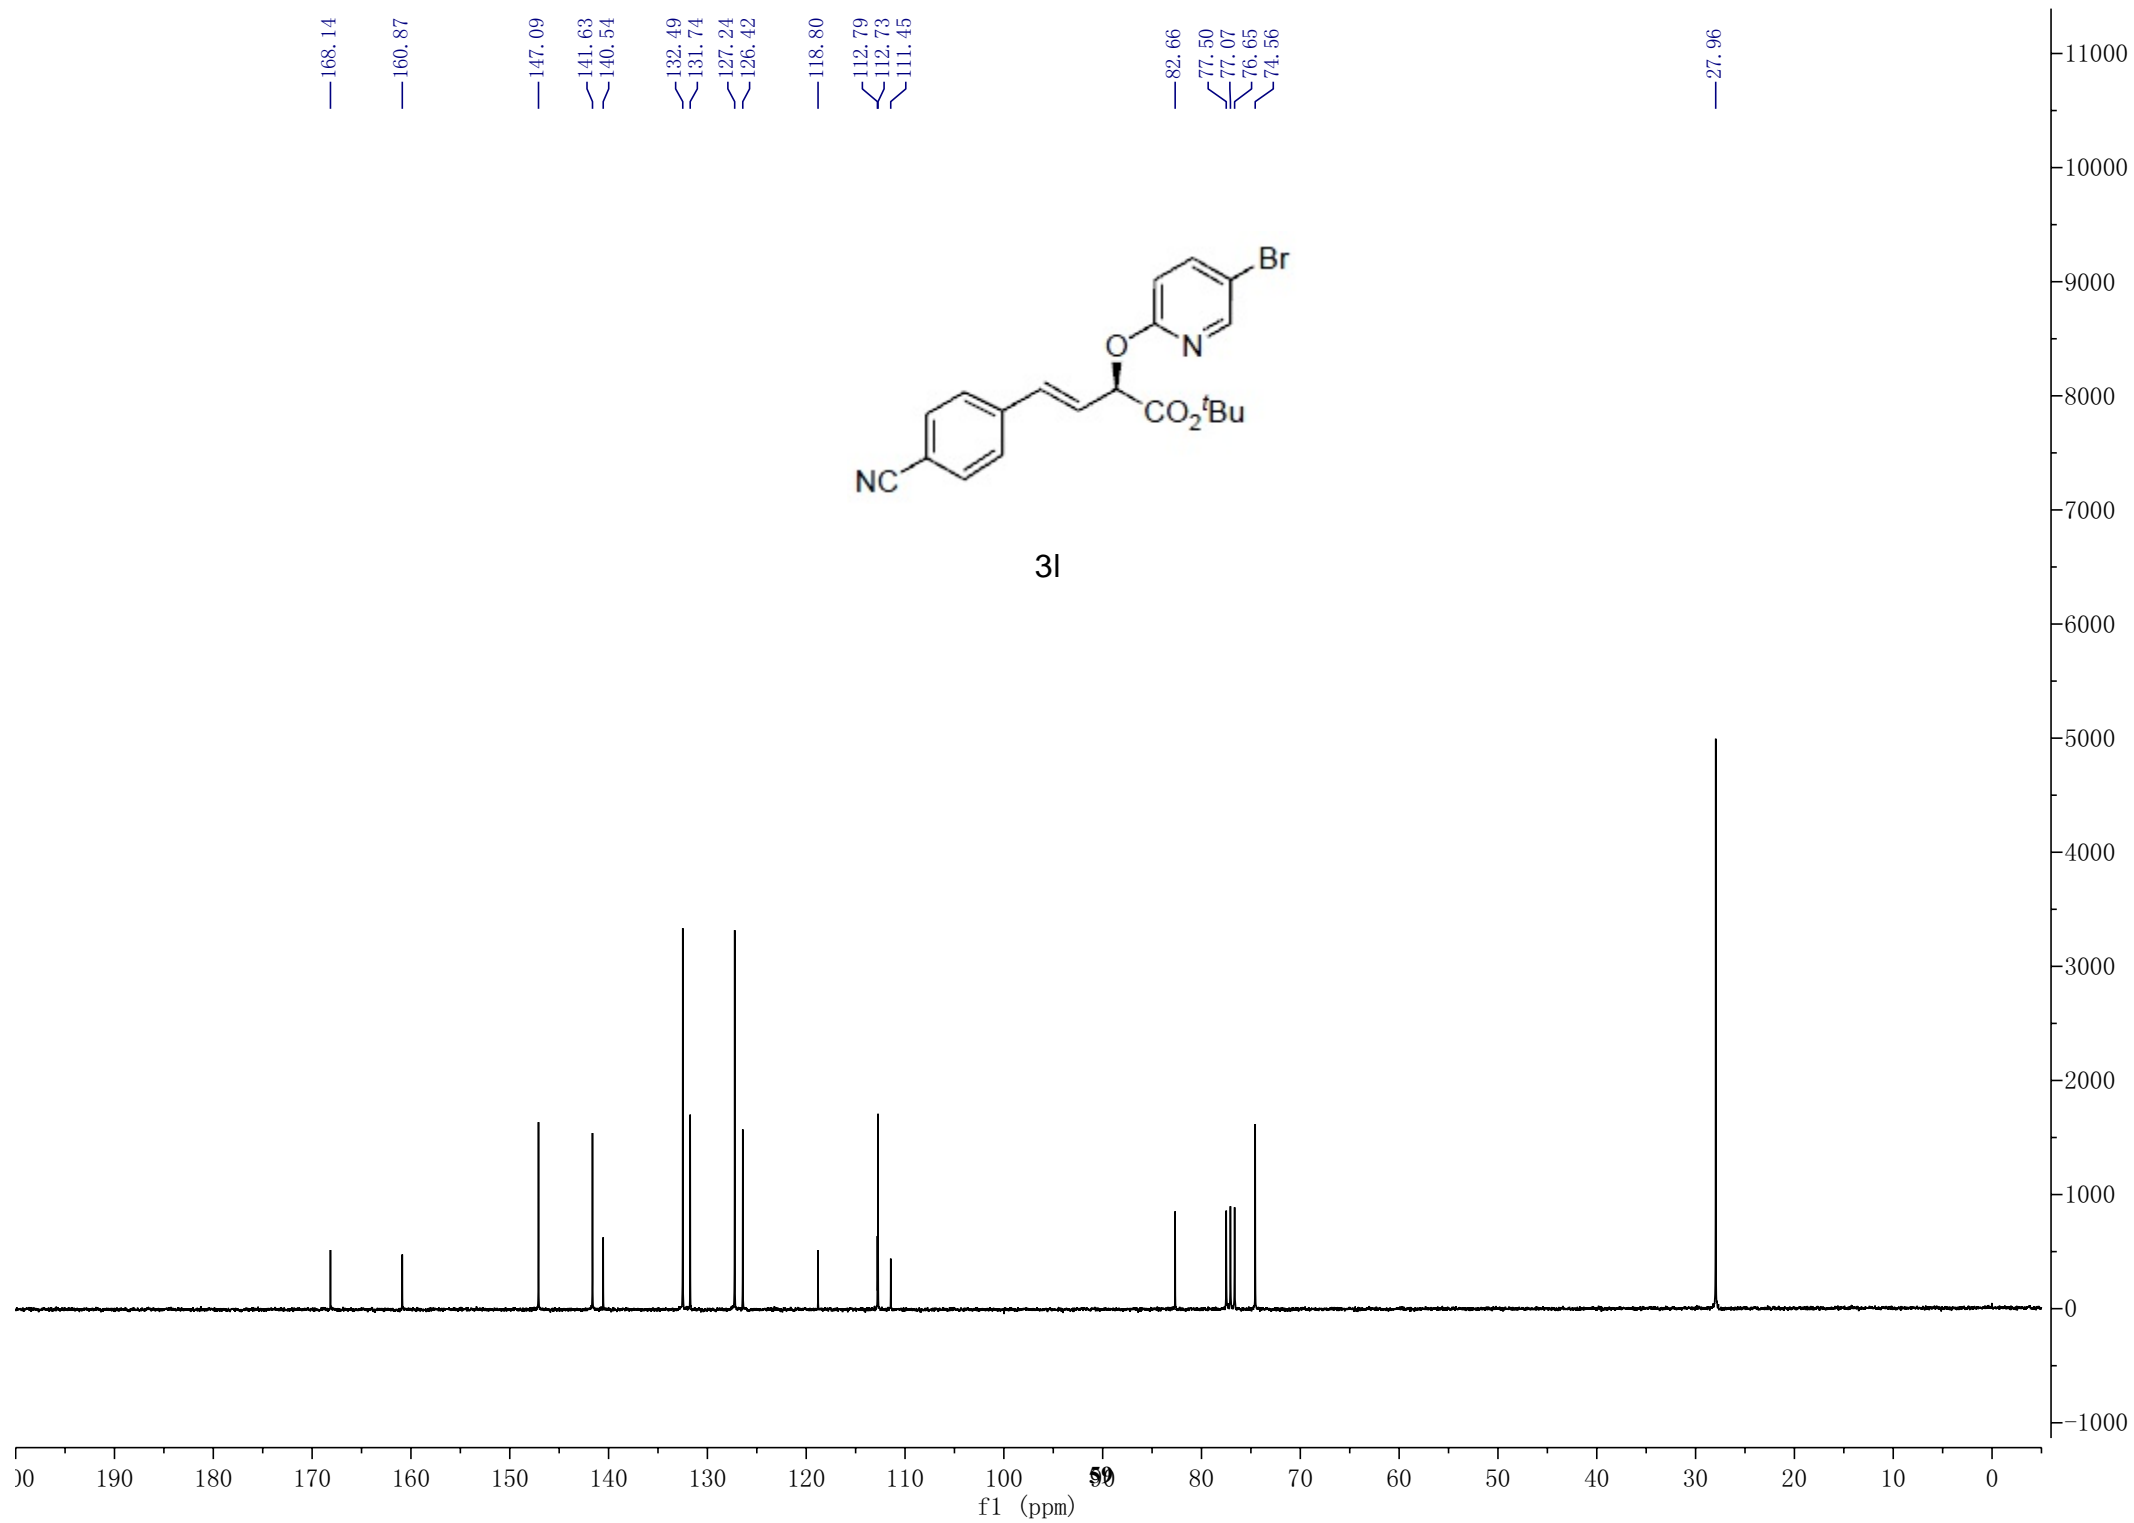

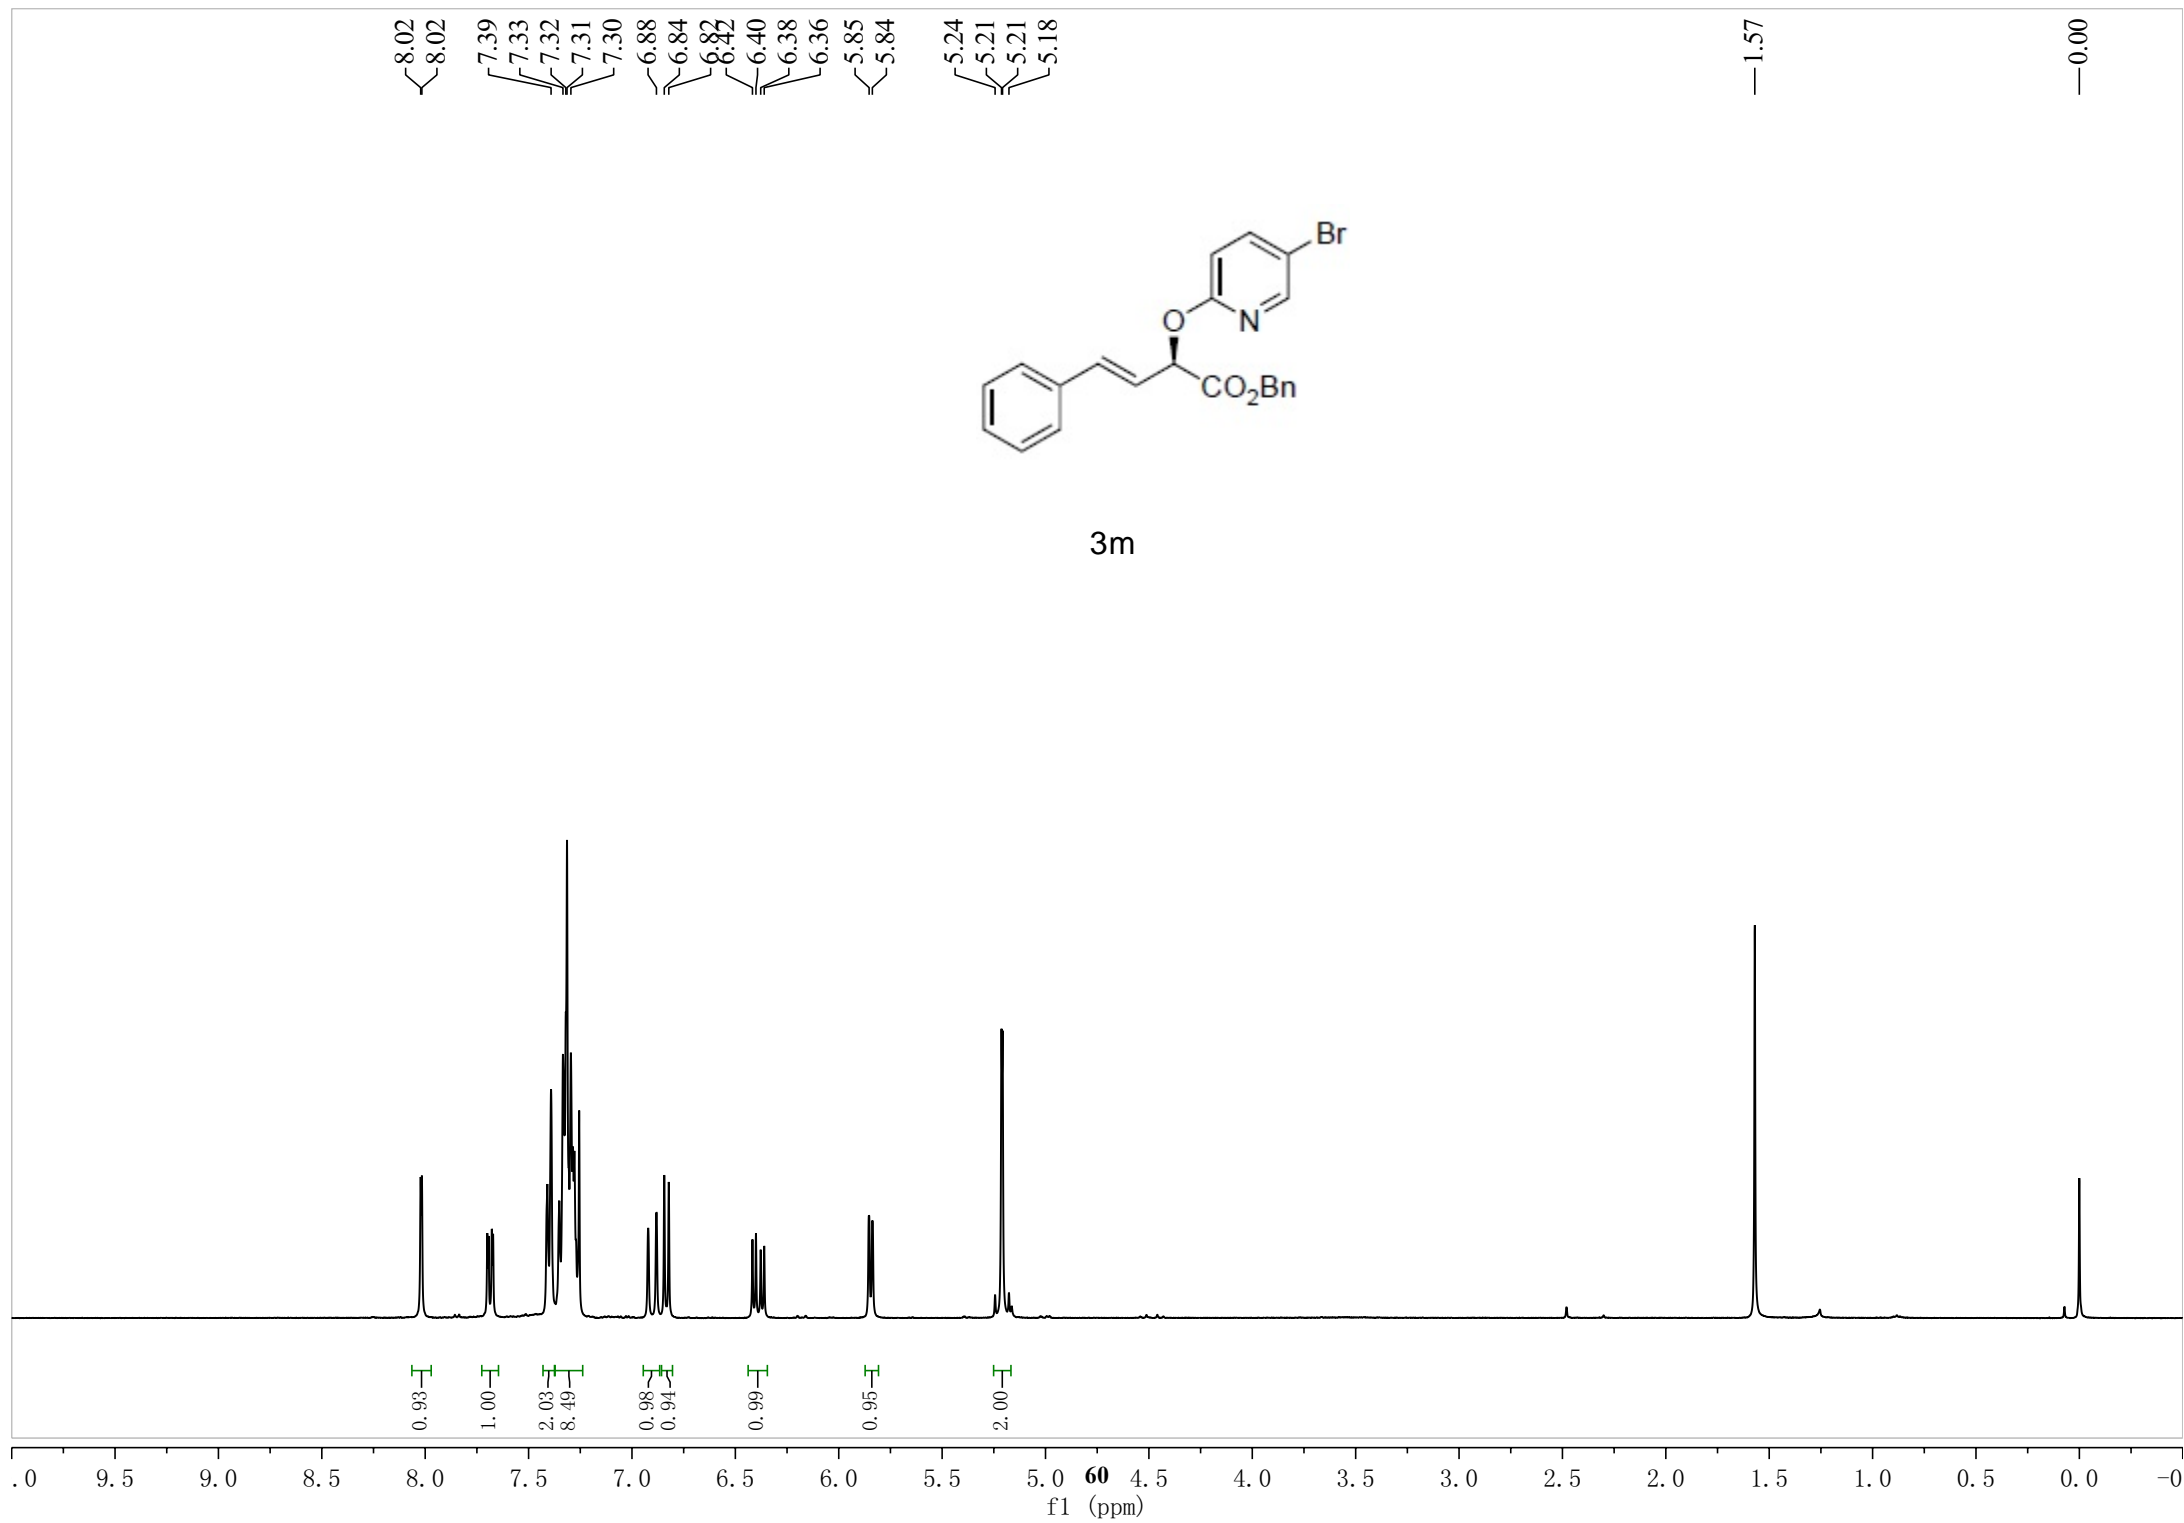

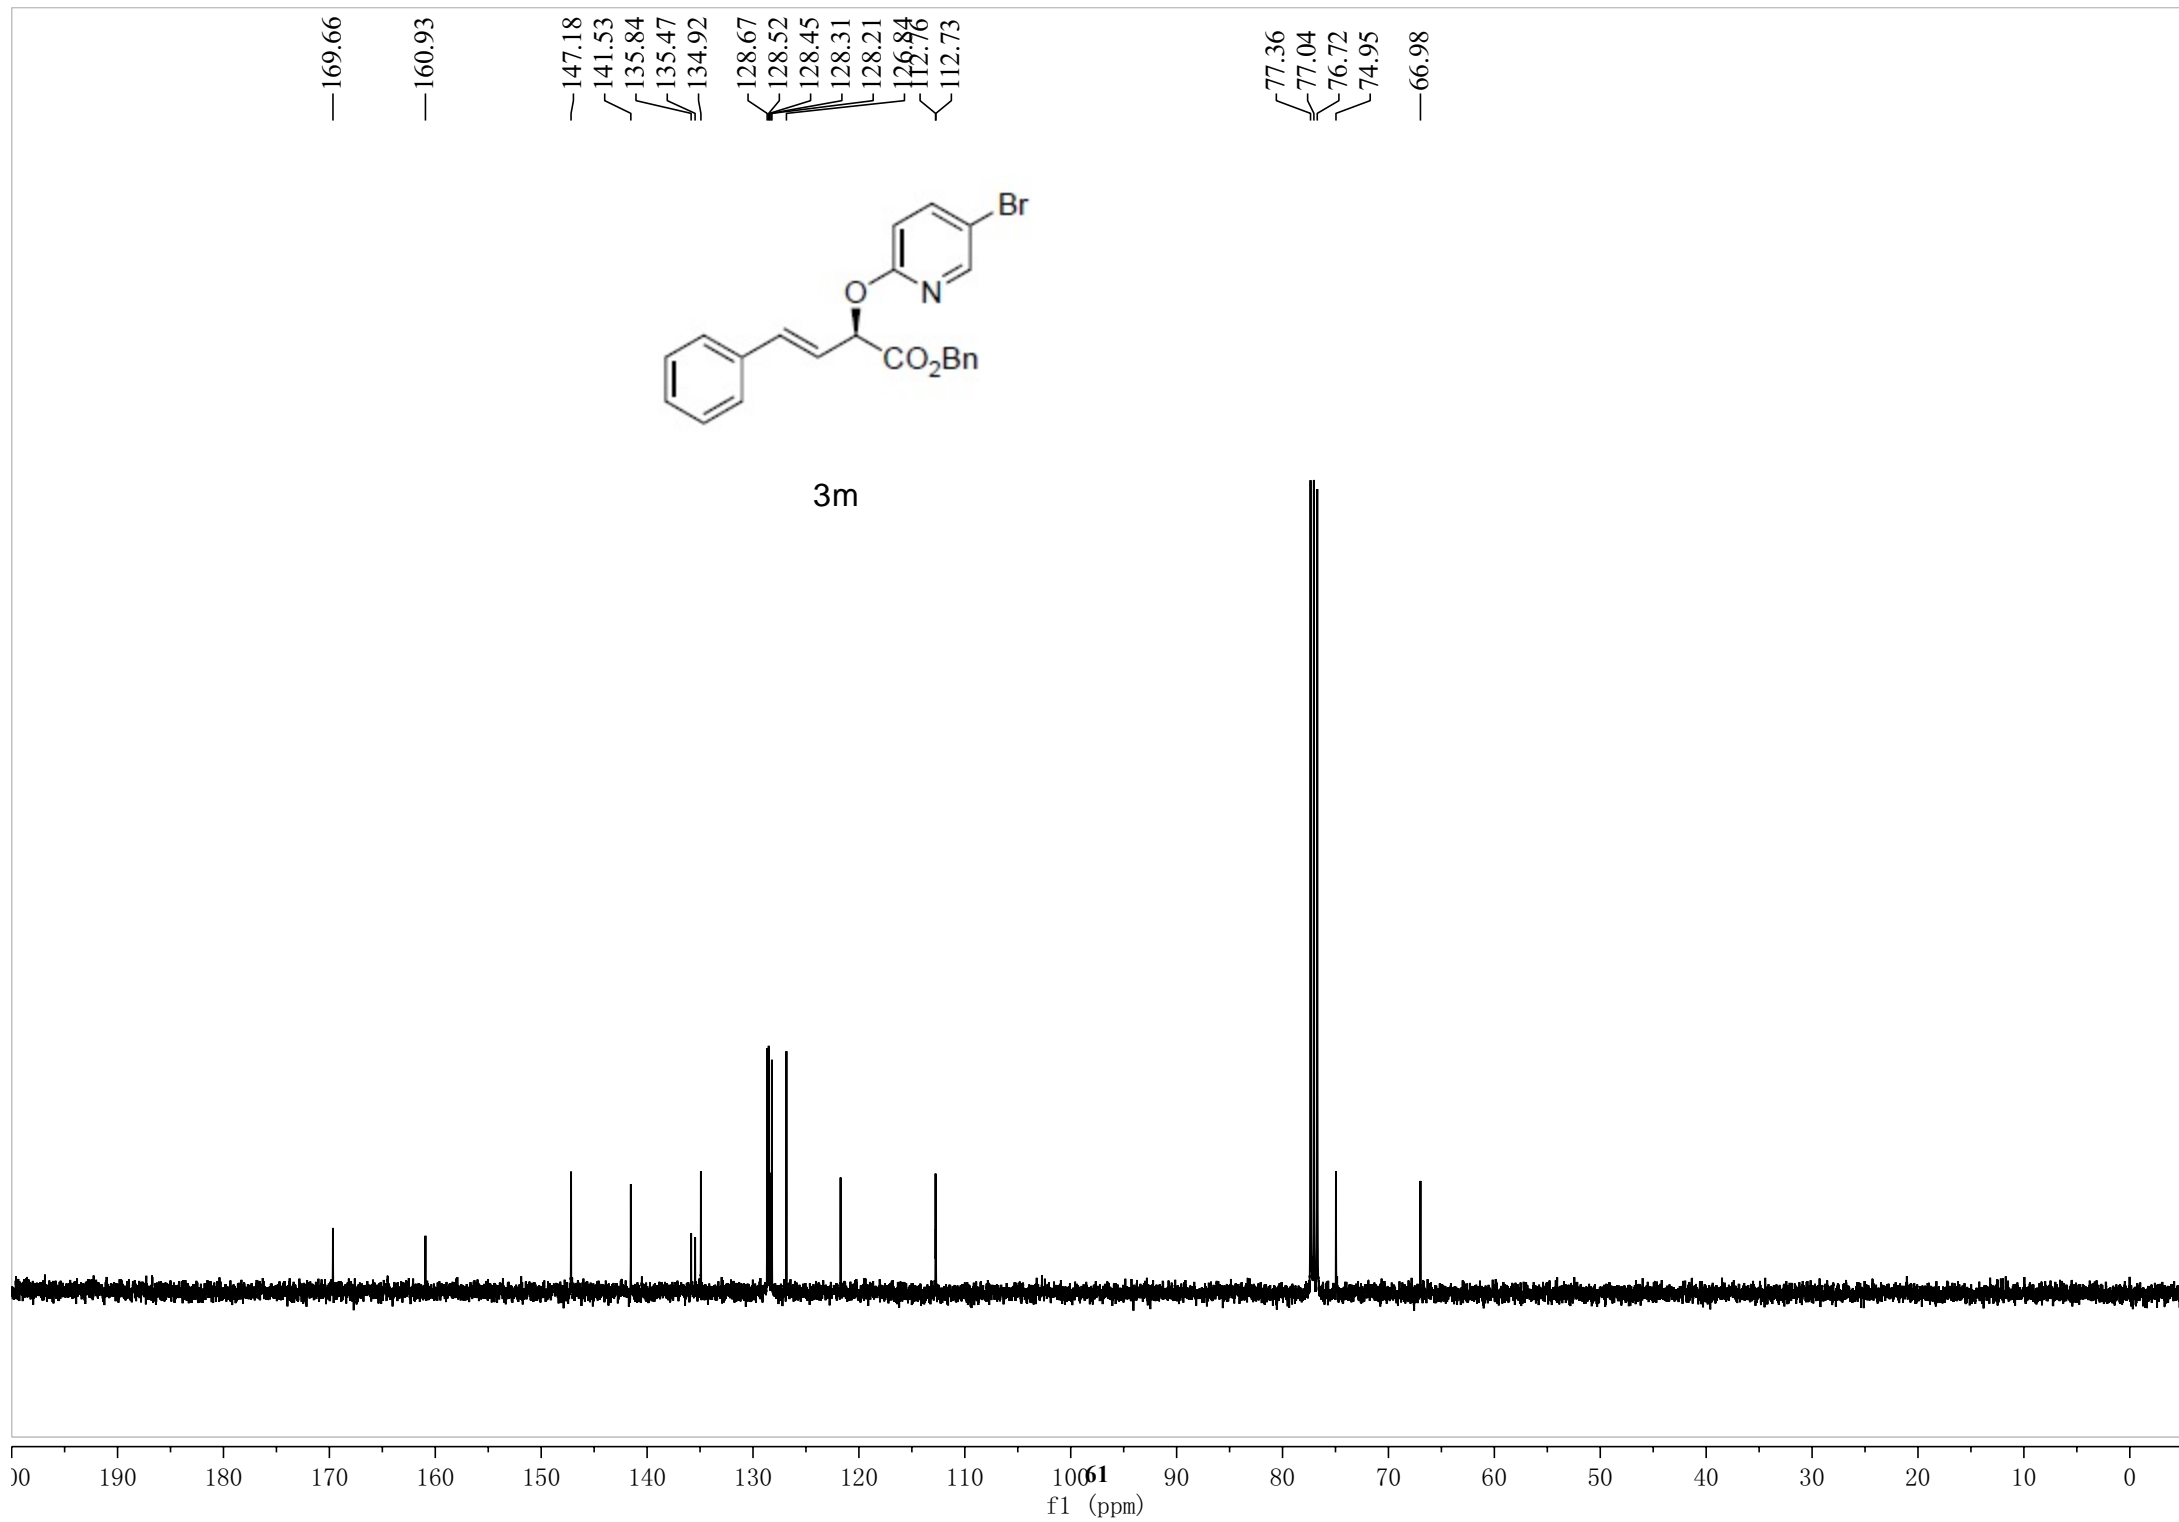

7.64  
7.61  
7.52  
7.51  
7.50  
7.49  
7.26  
6.96  
6.92  
6.77  
6.75  
6.72  
6.70  
6.57  
6.56  
6.53  
6.52  
5.81  
5.81  
5.80  
5.80

2.40

1.58  
1.49  
1.47  
1.45  
1.26

0.00

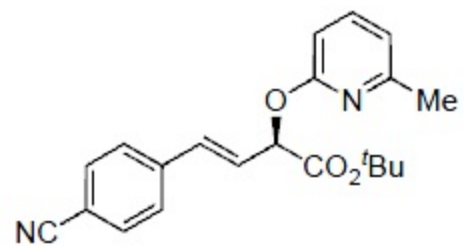

3n

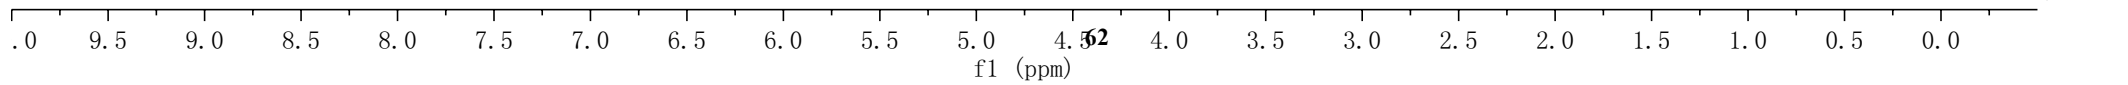

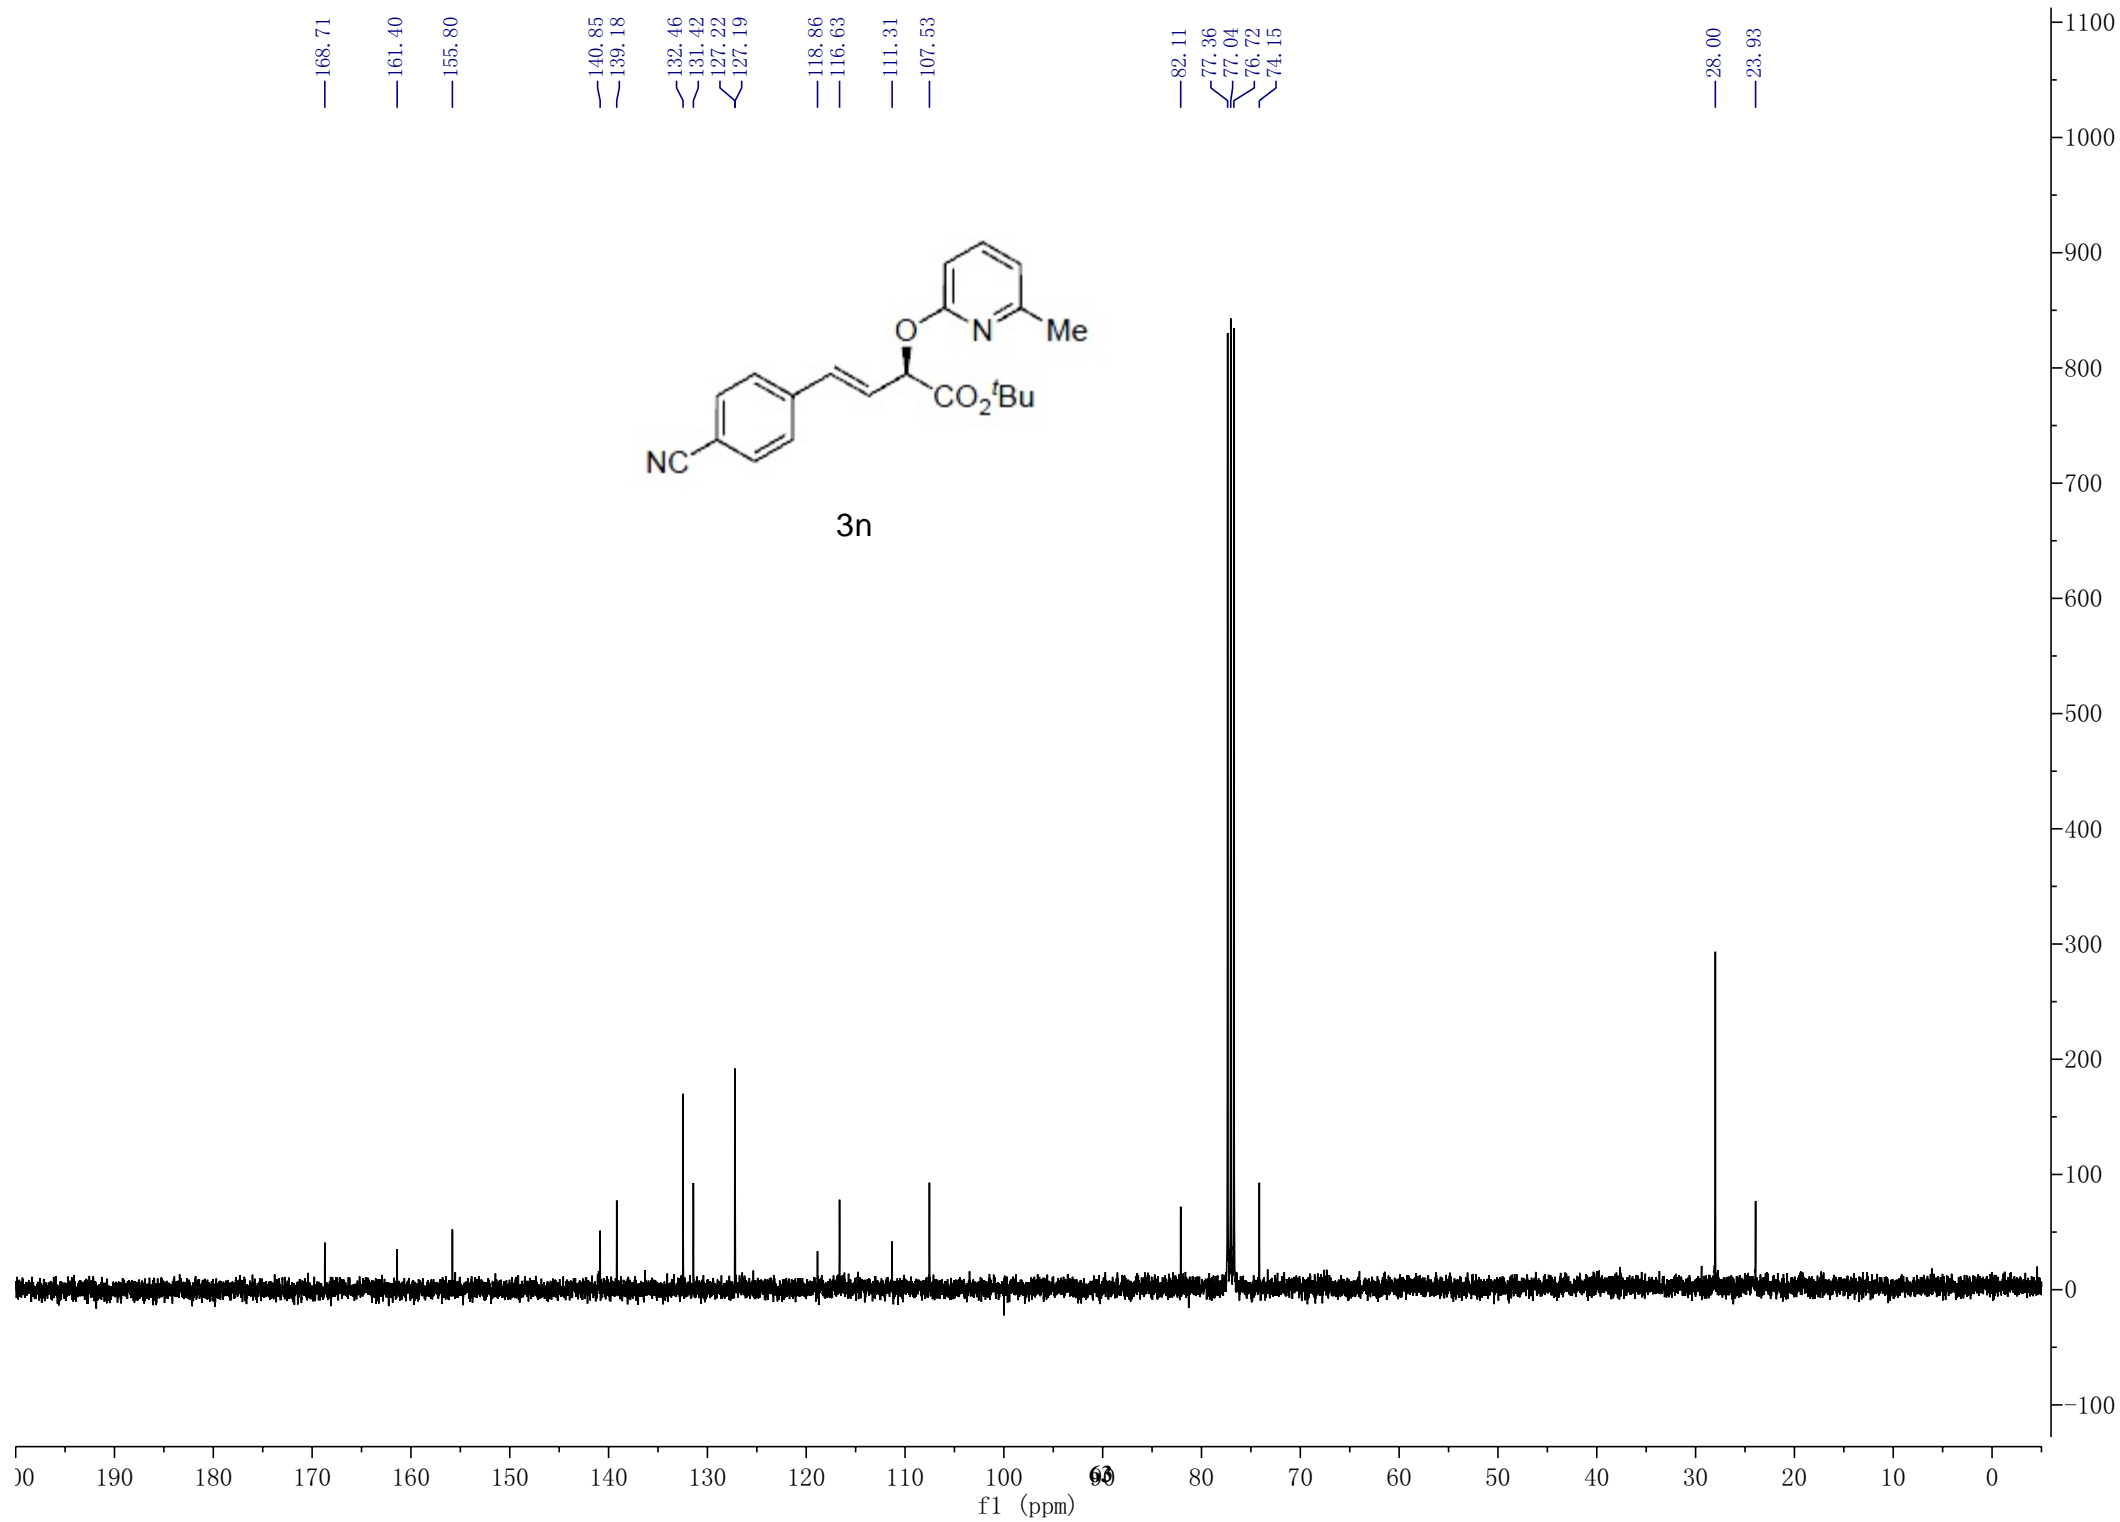

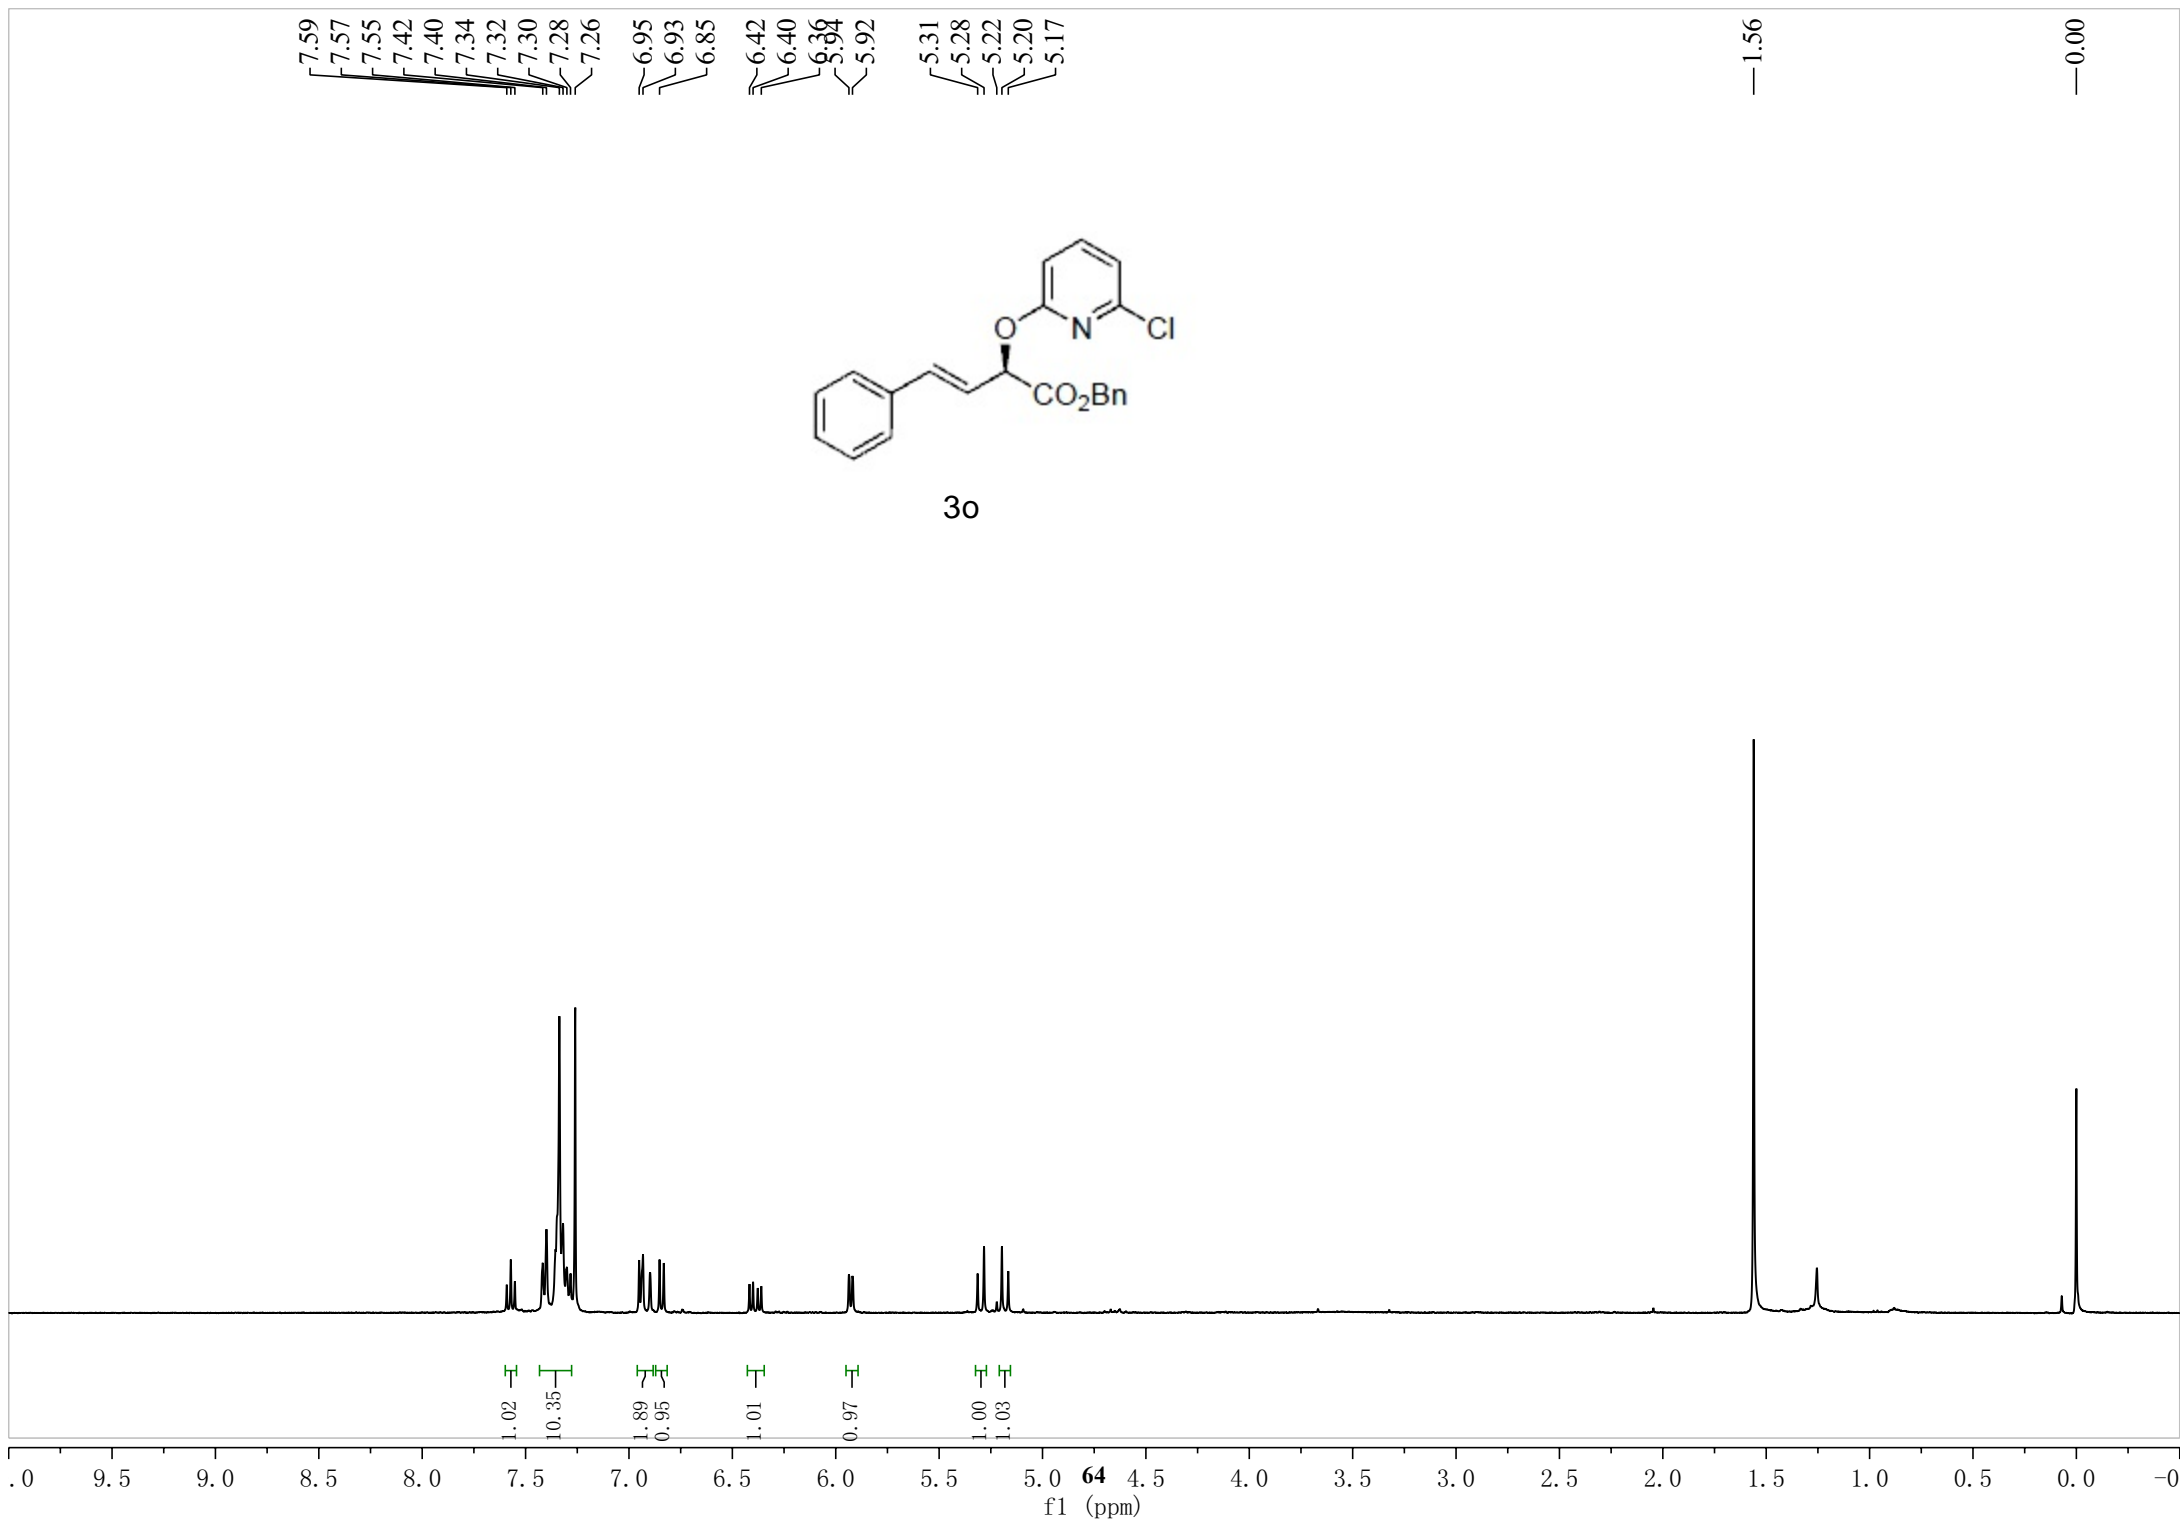

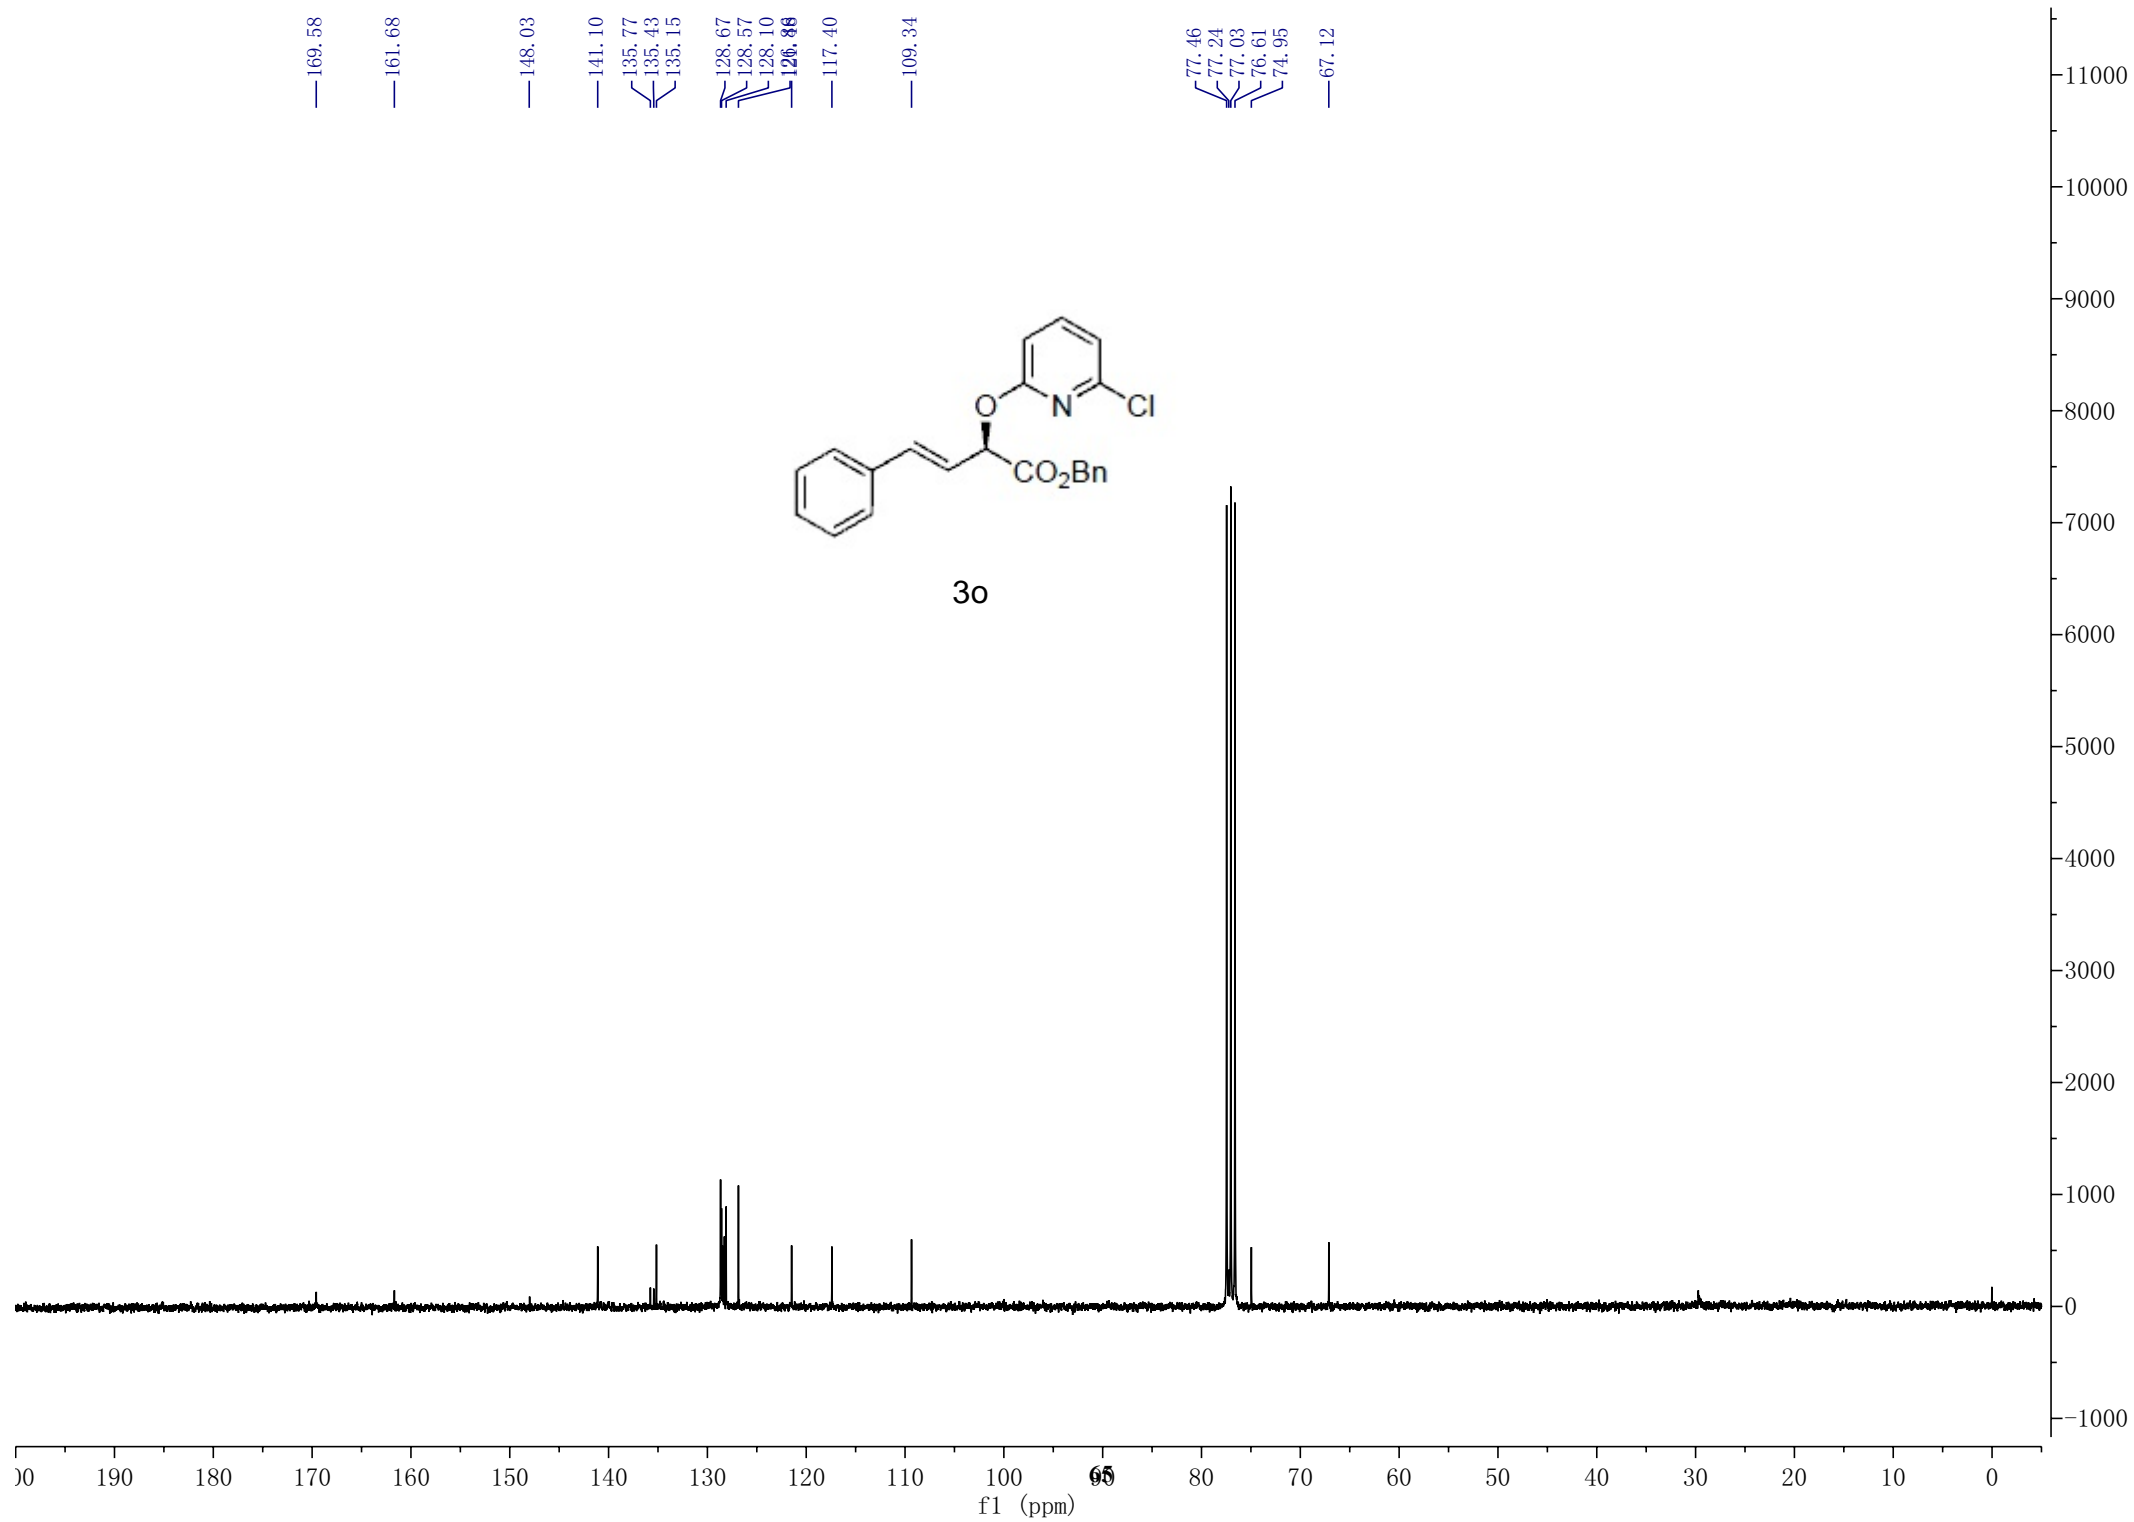

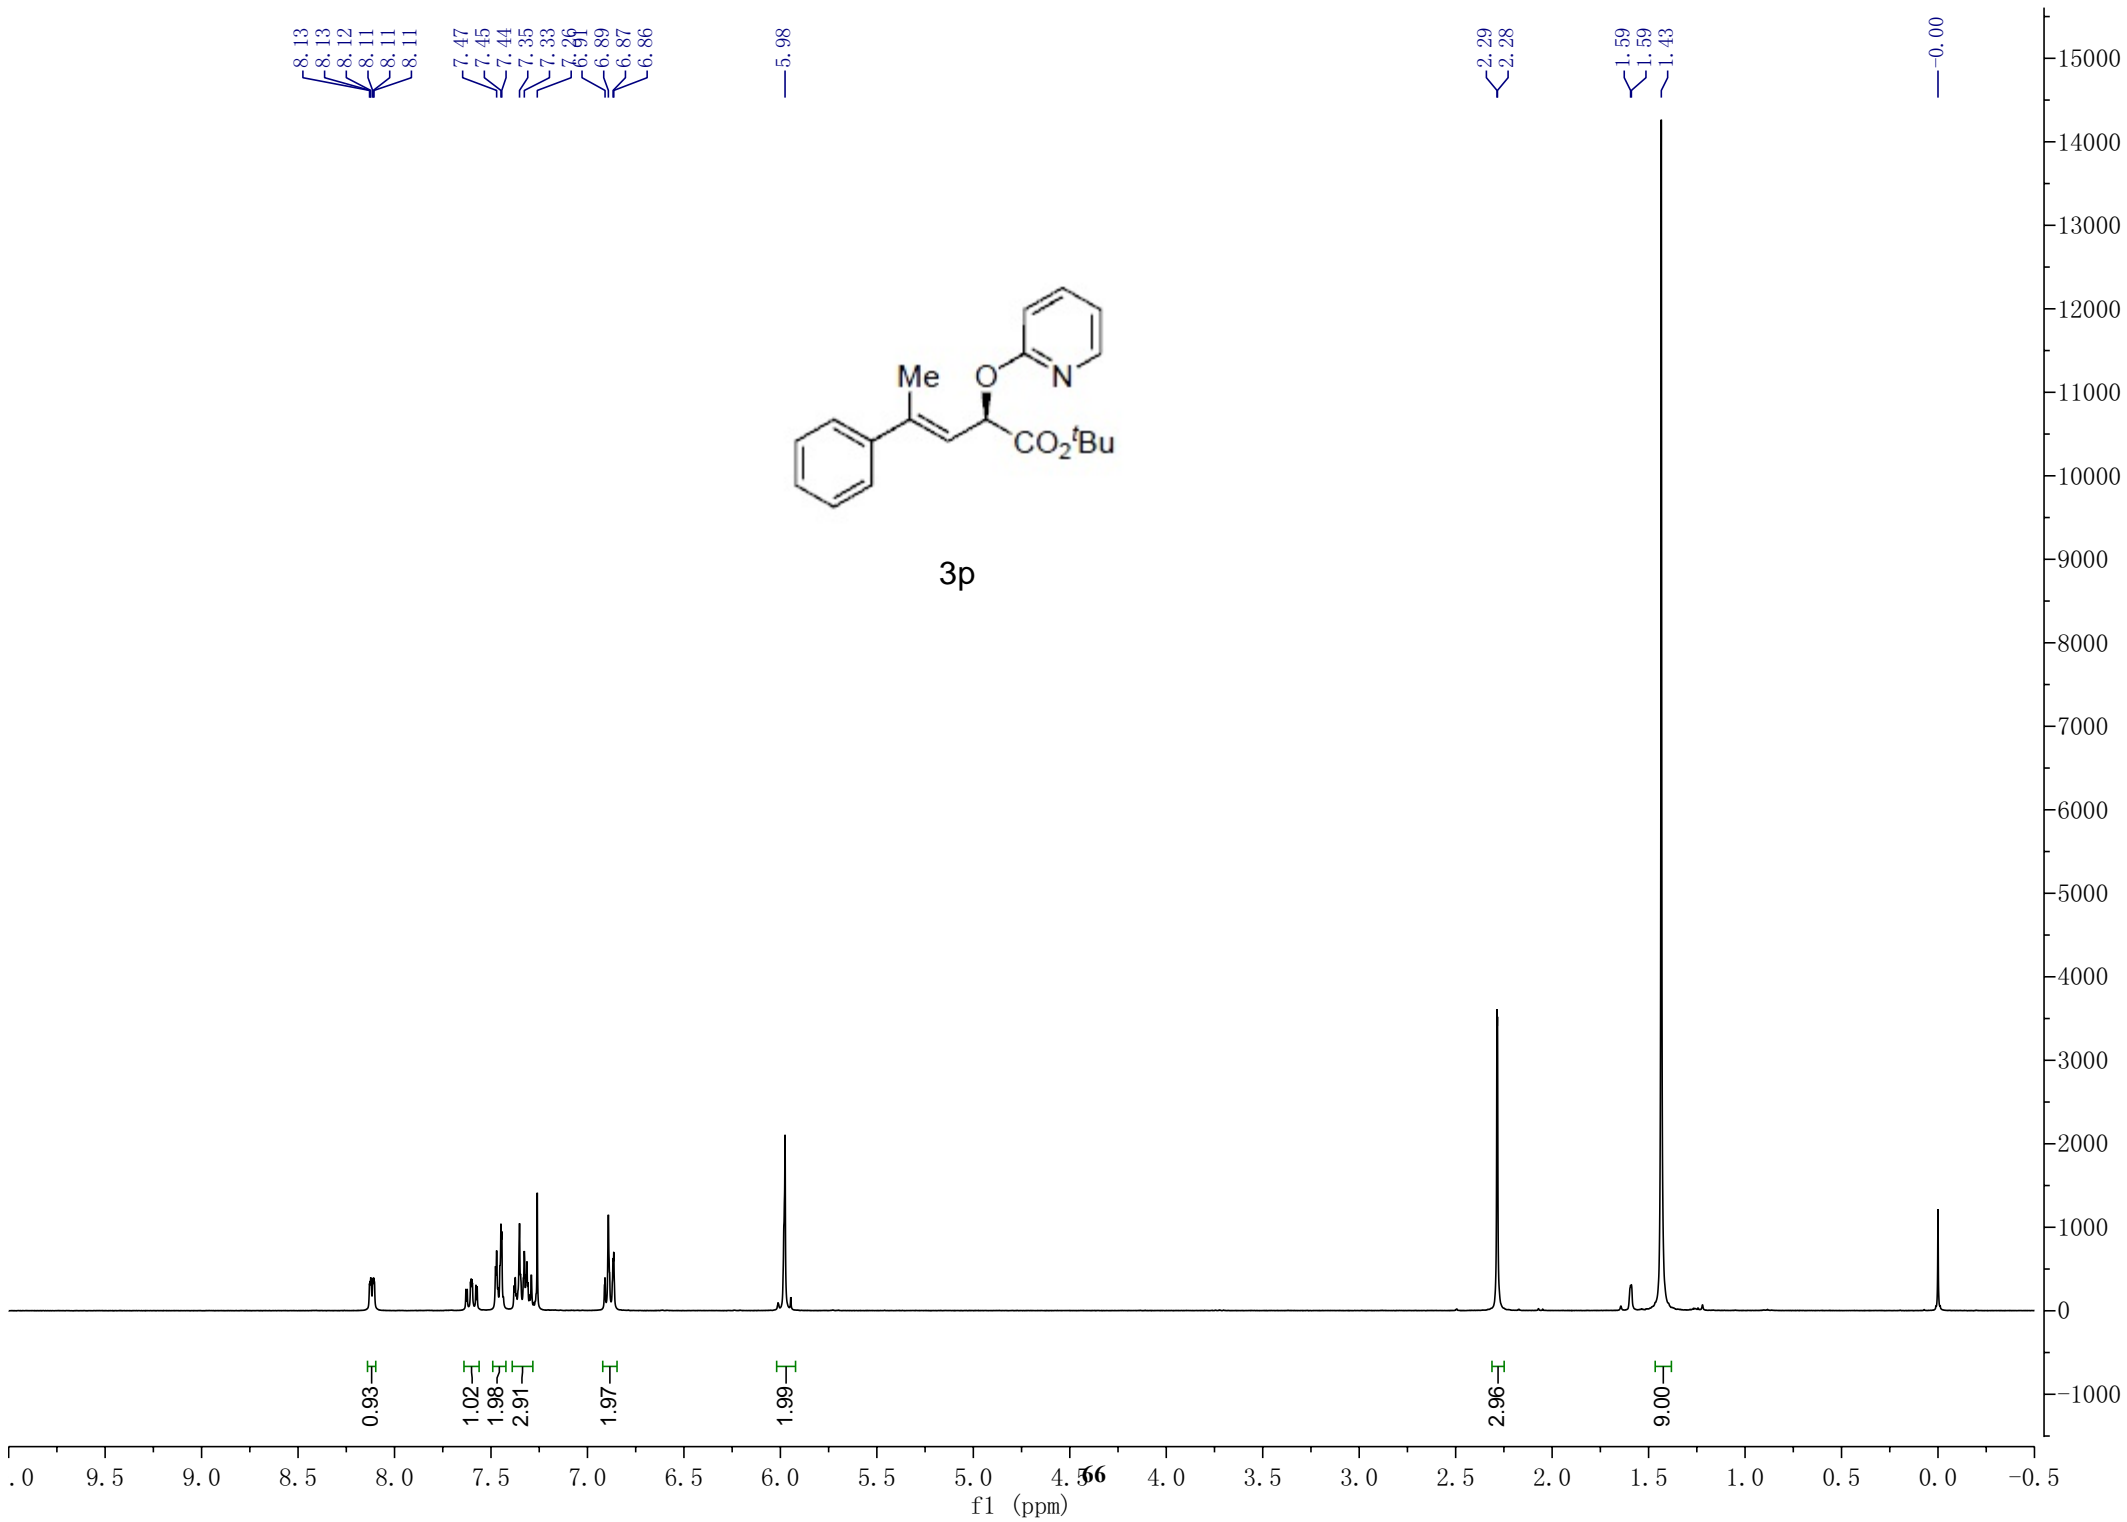

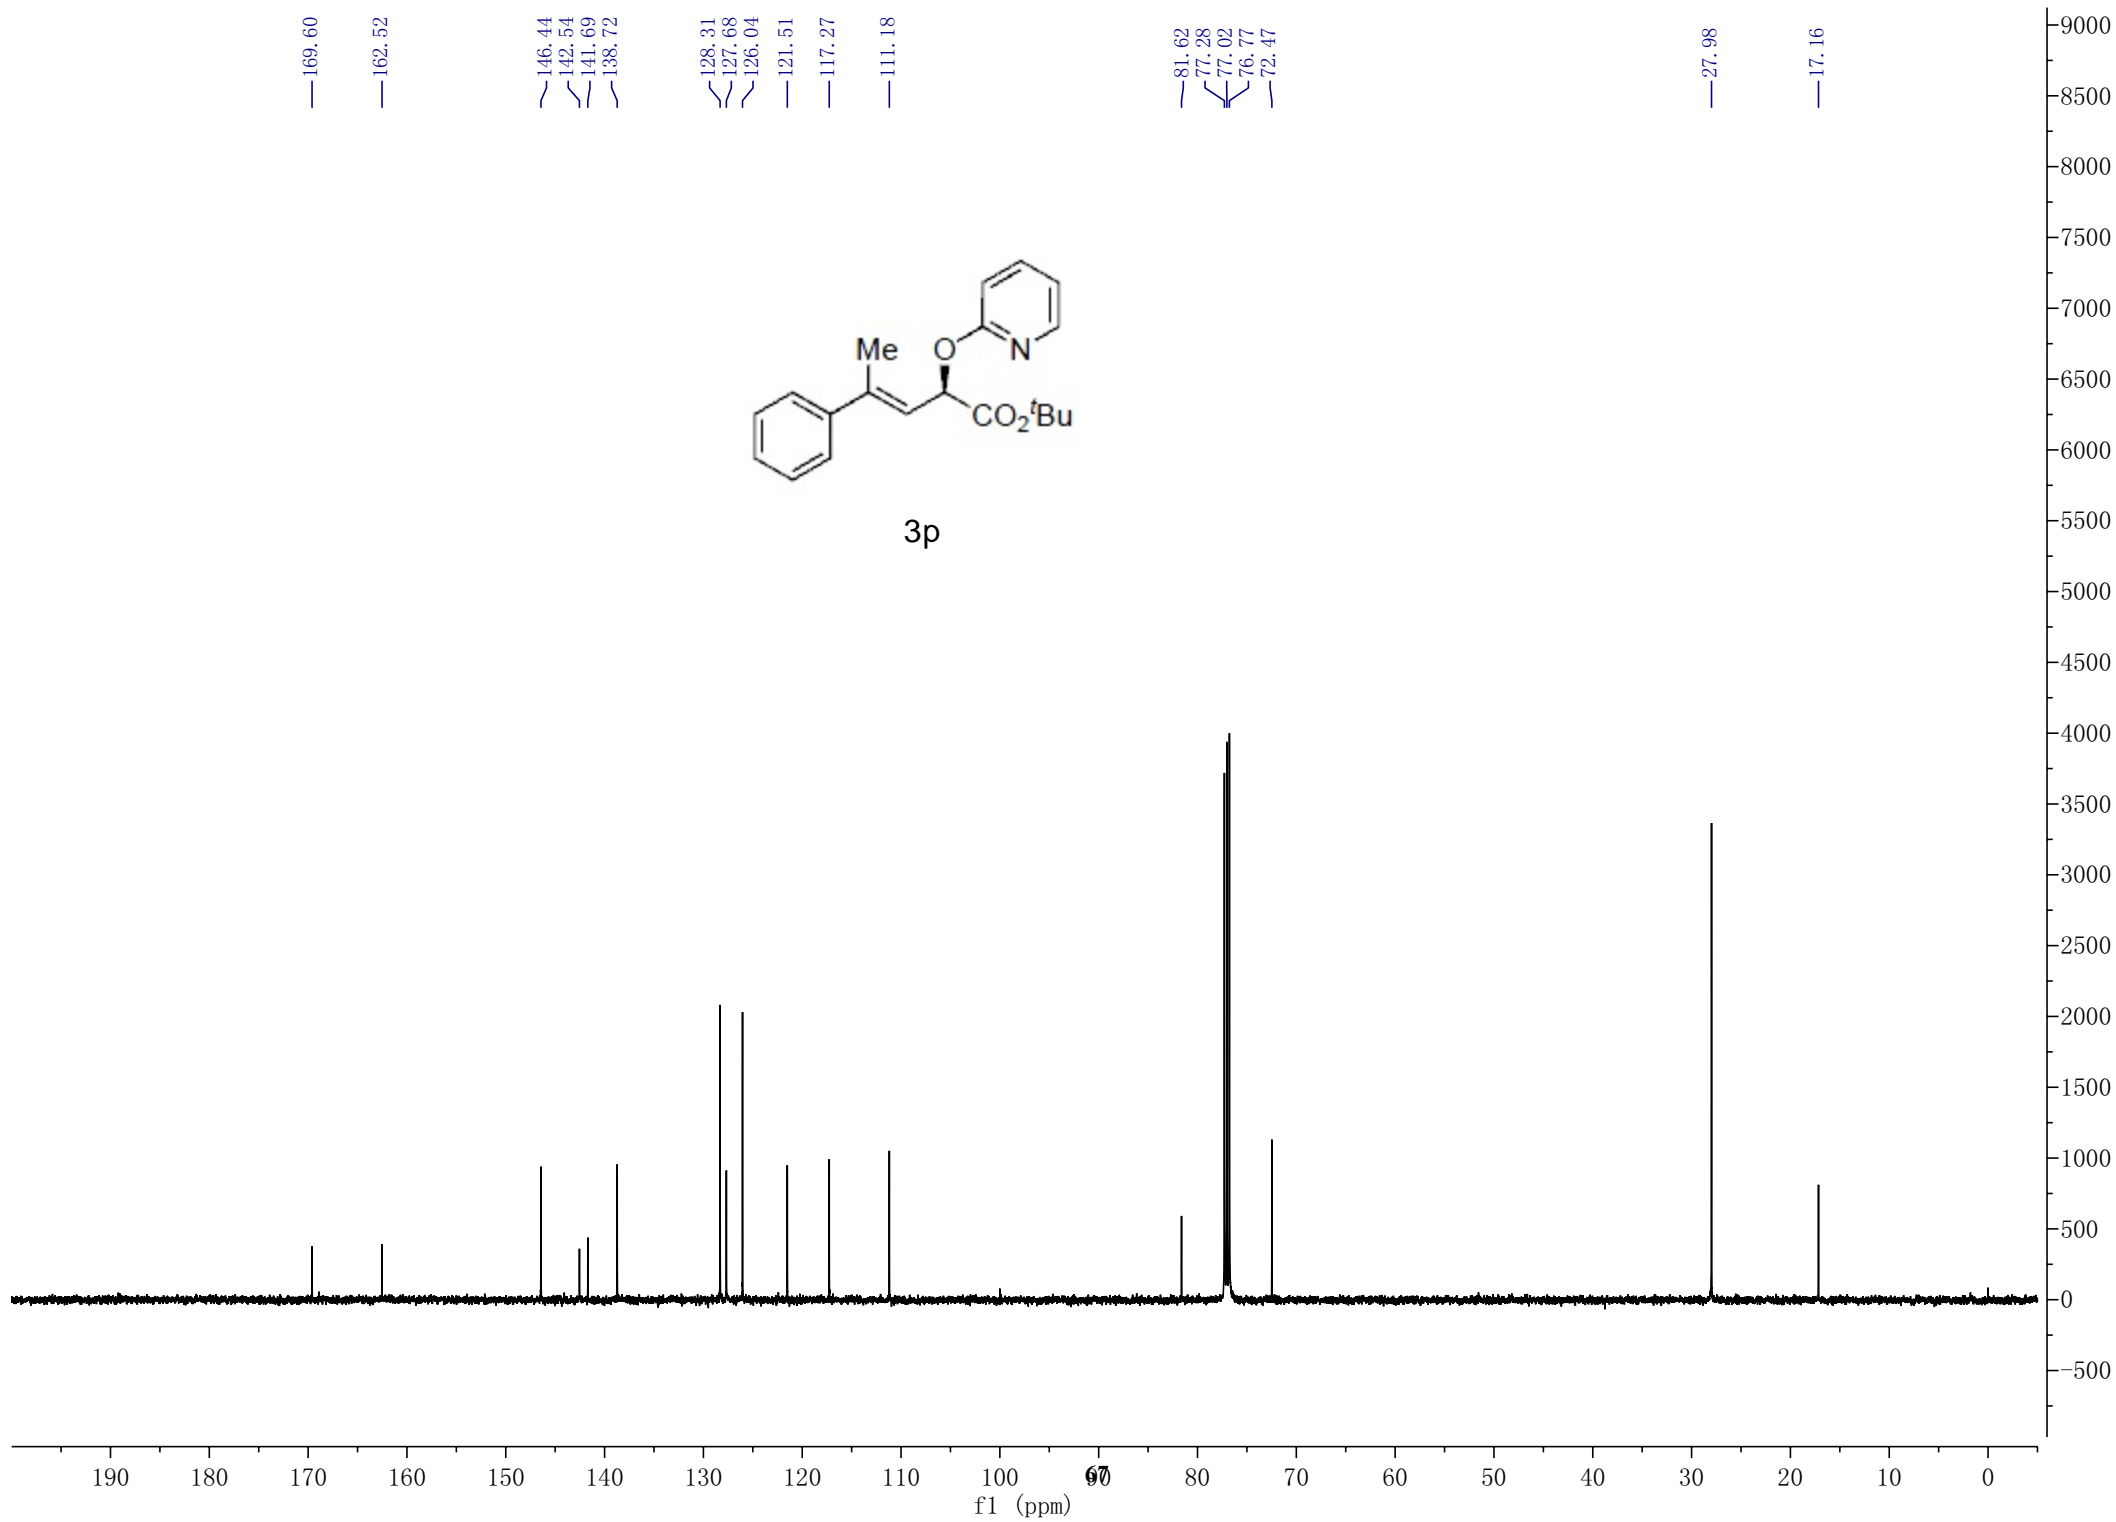

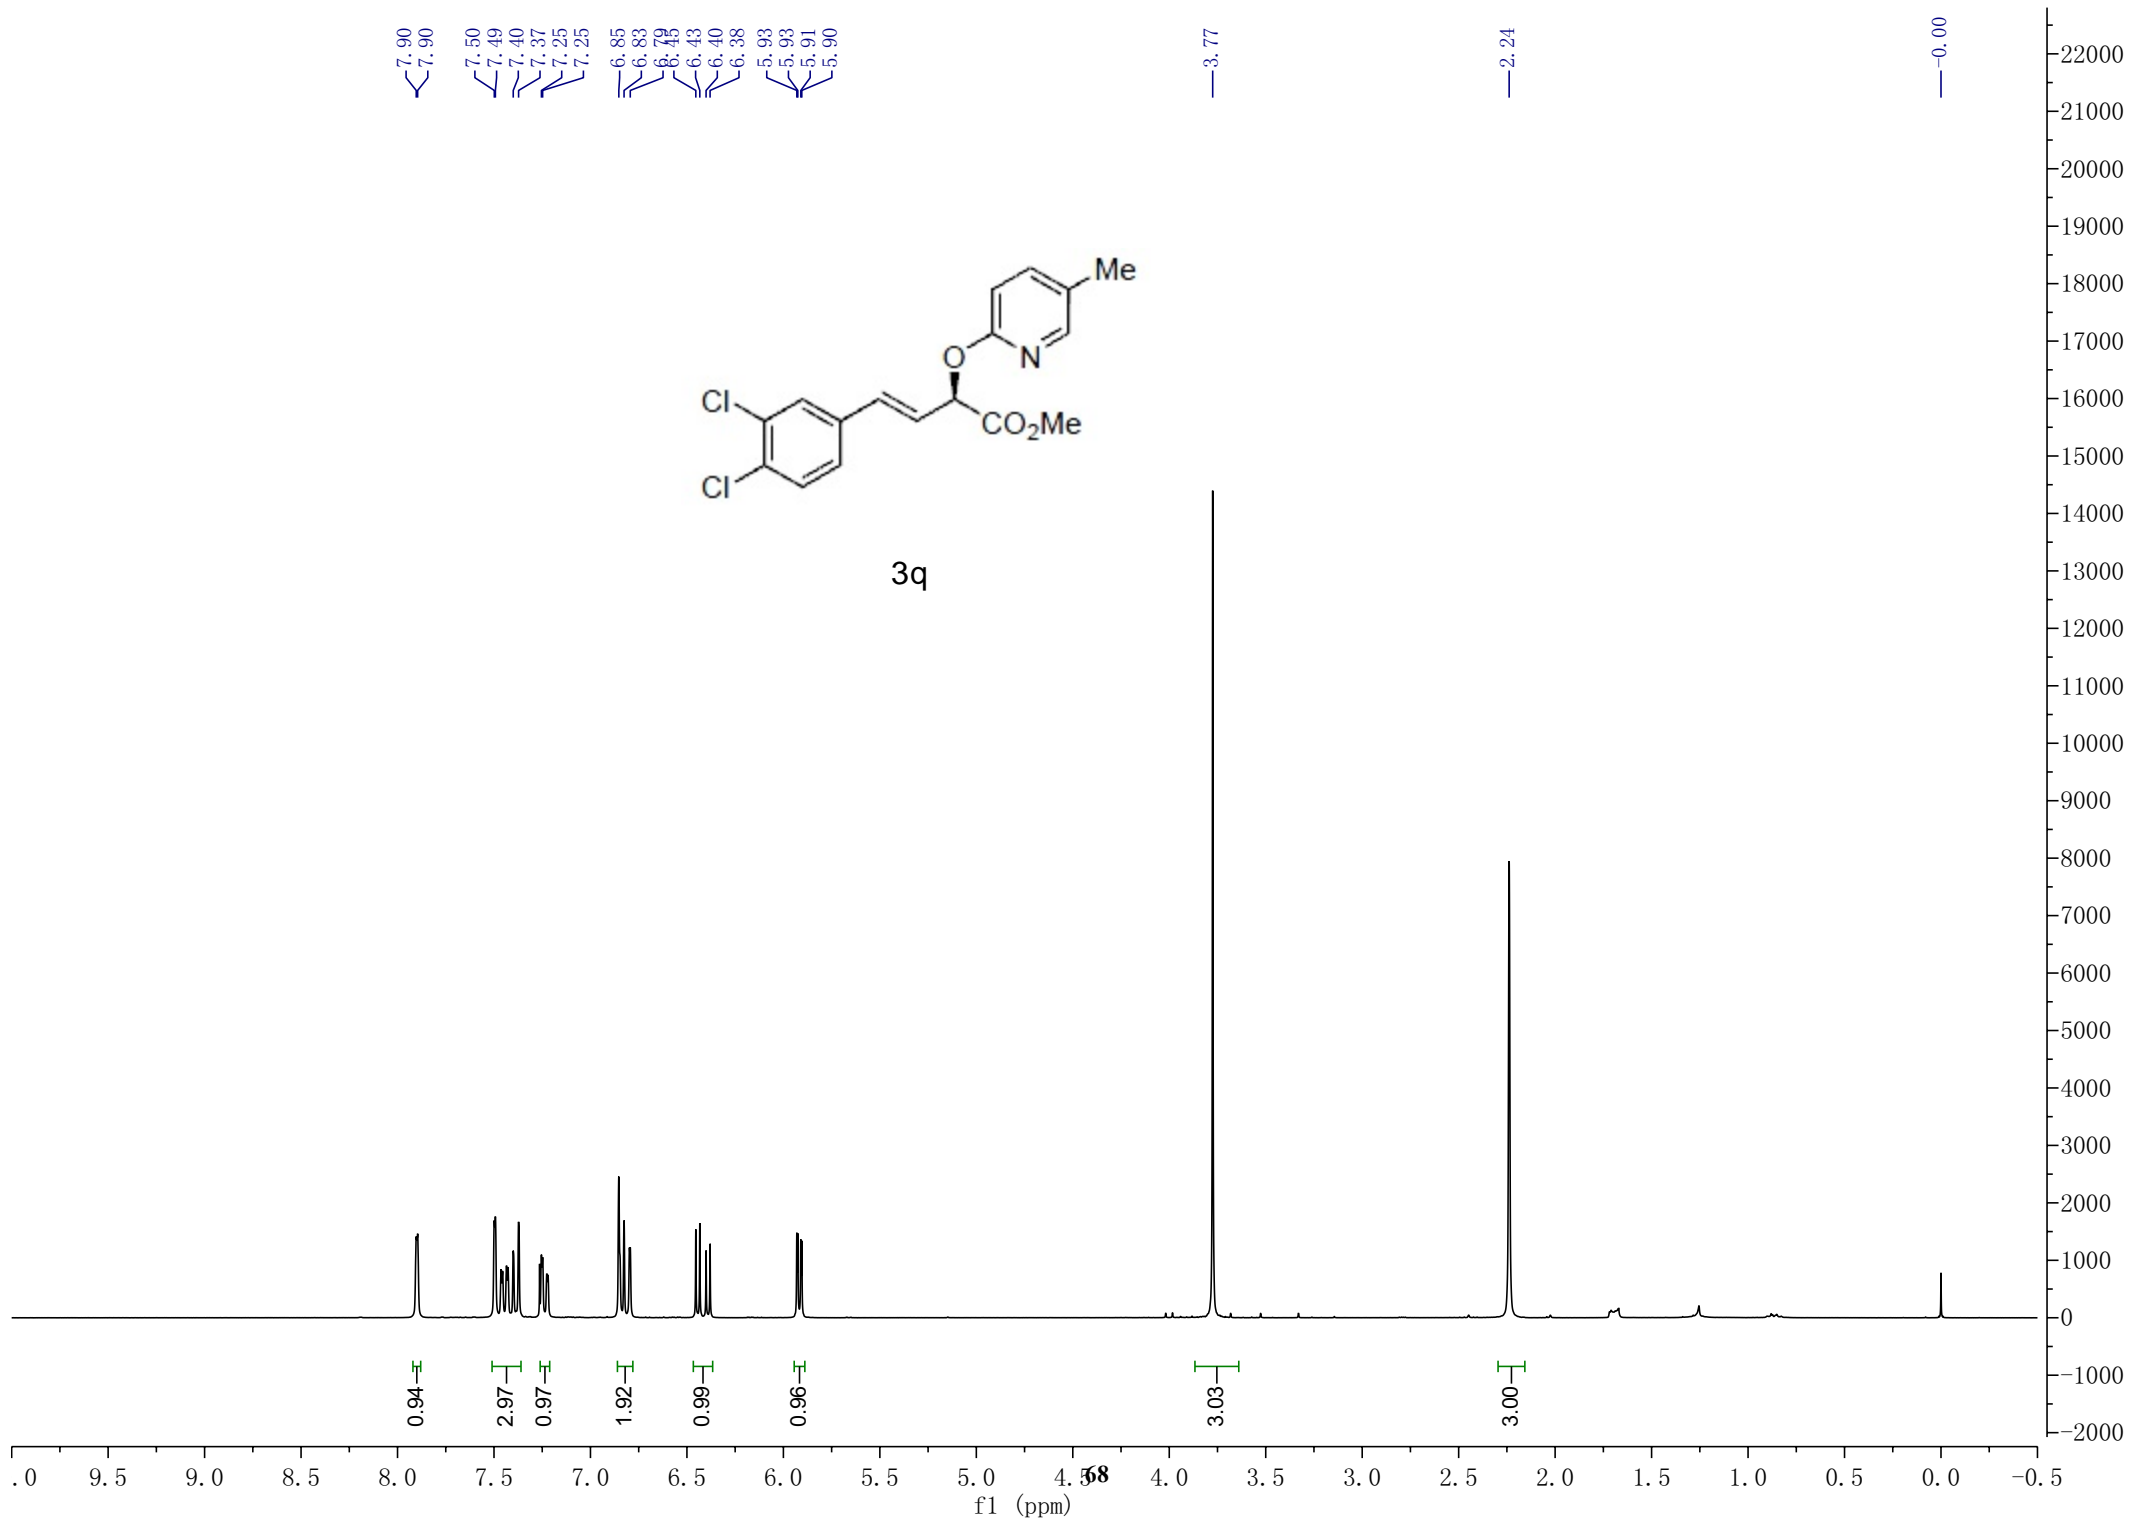

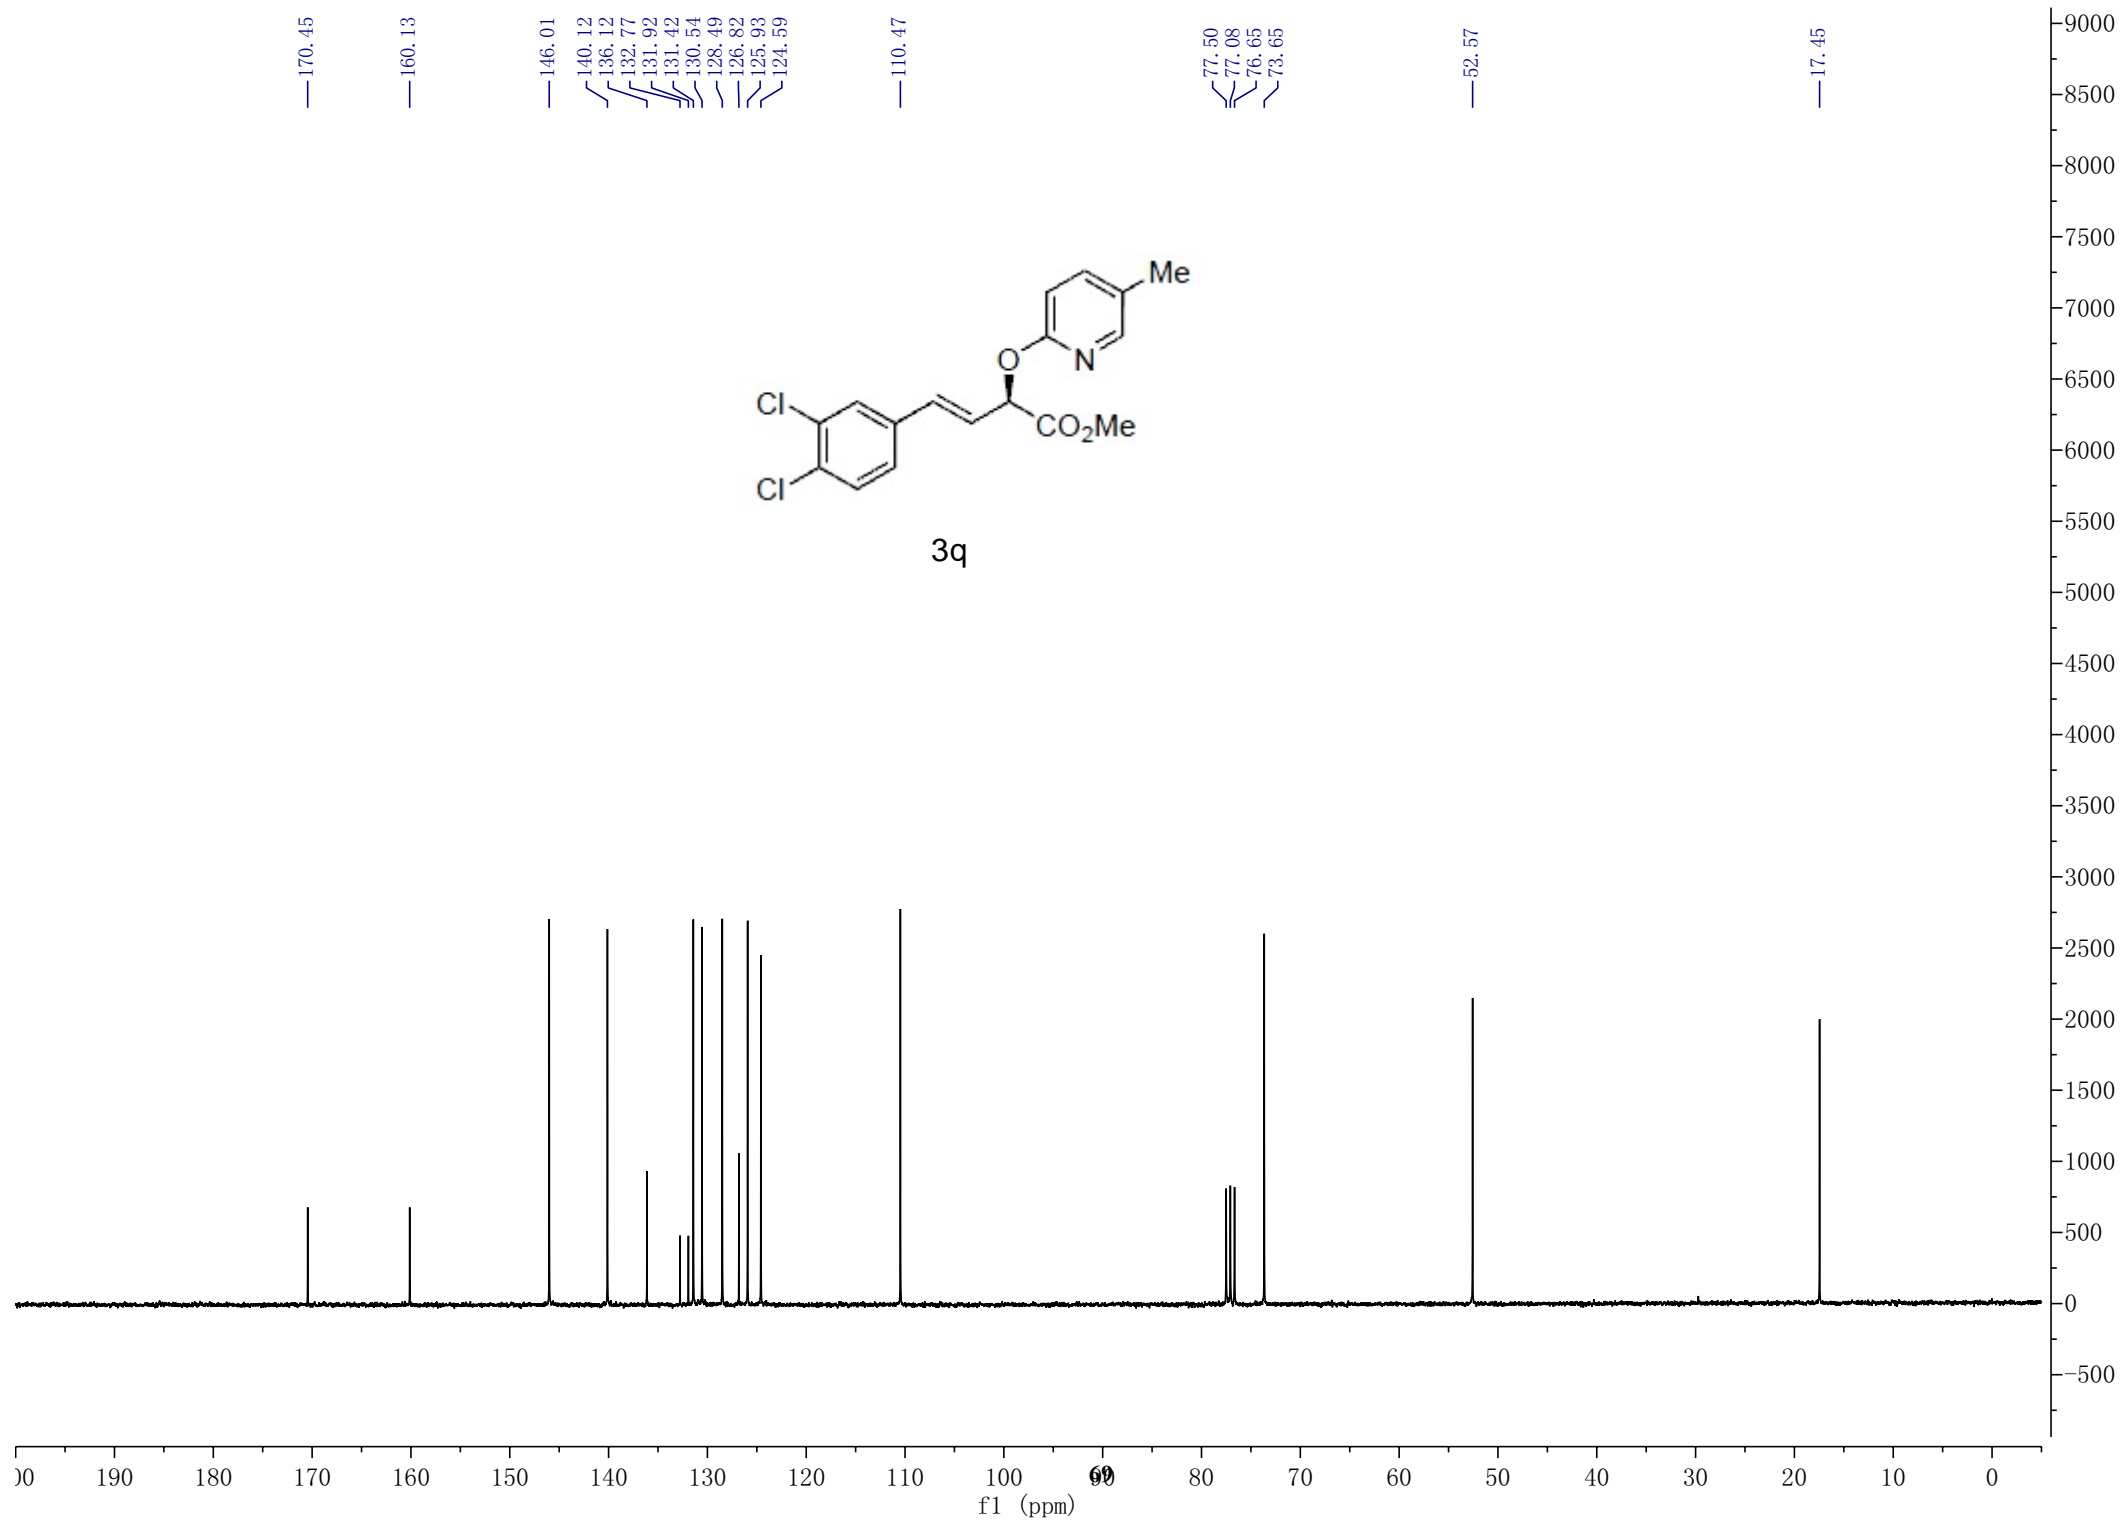

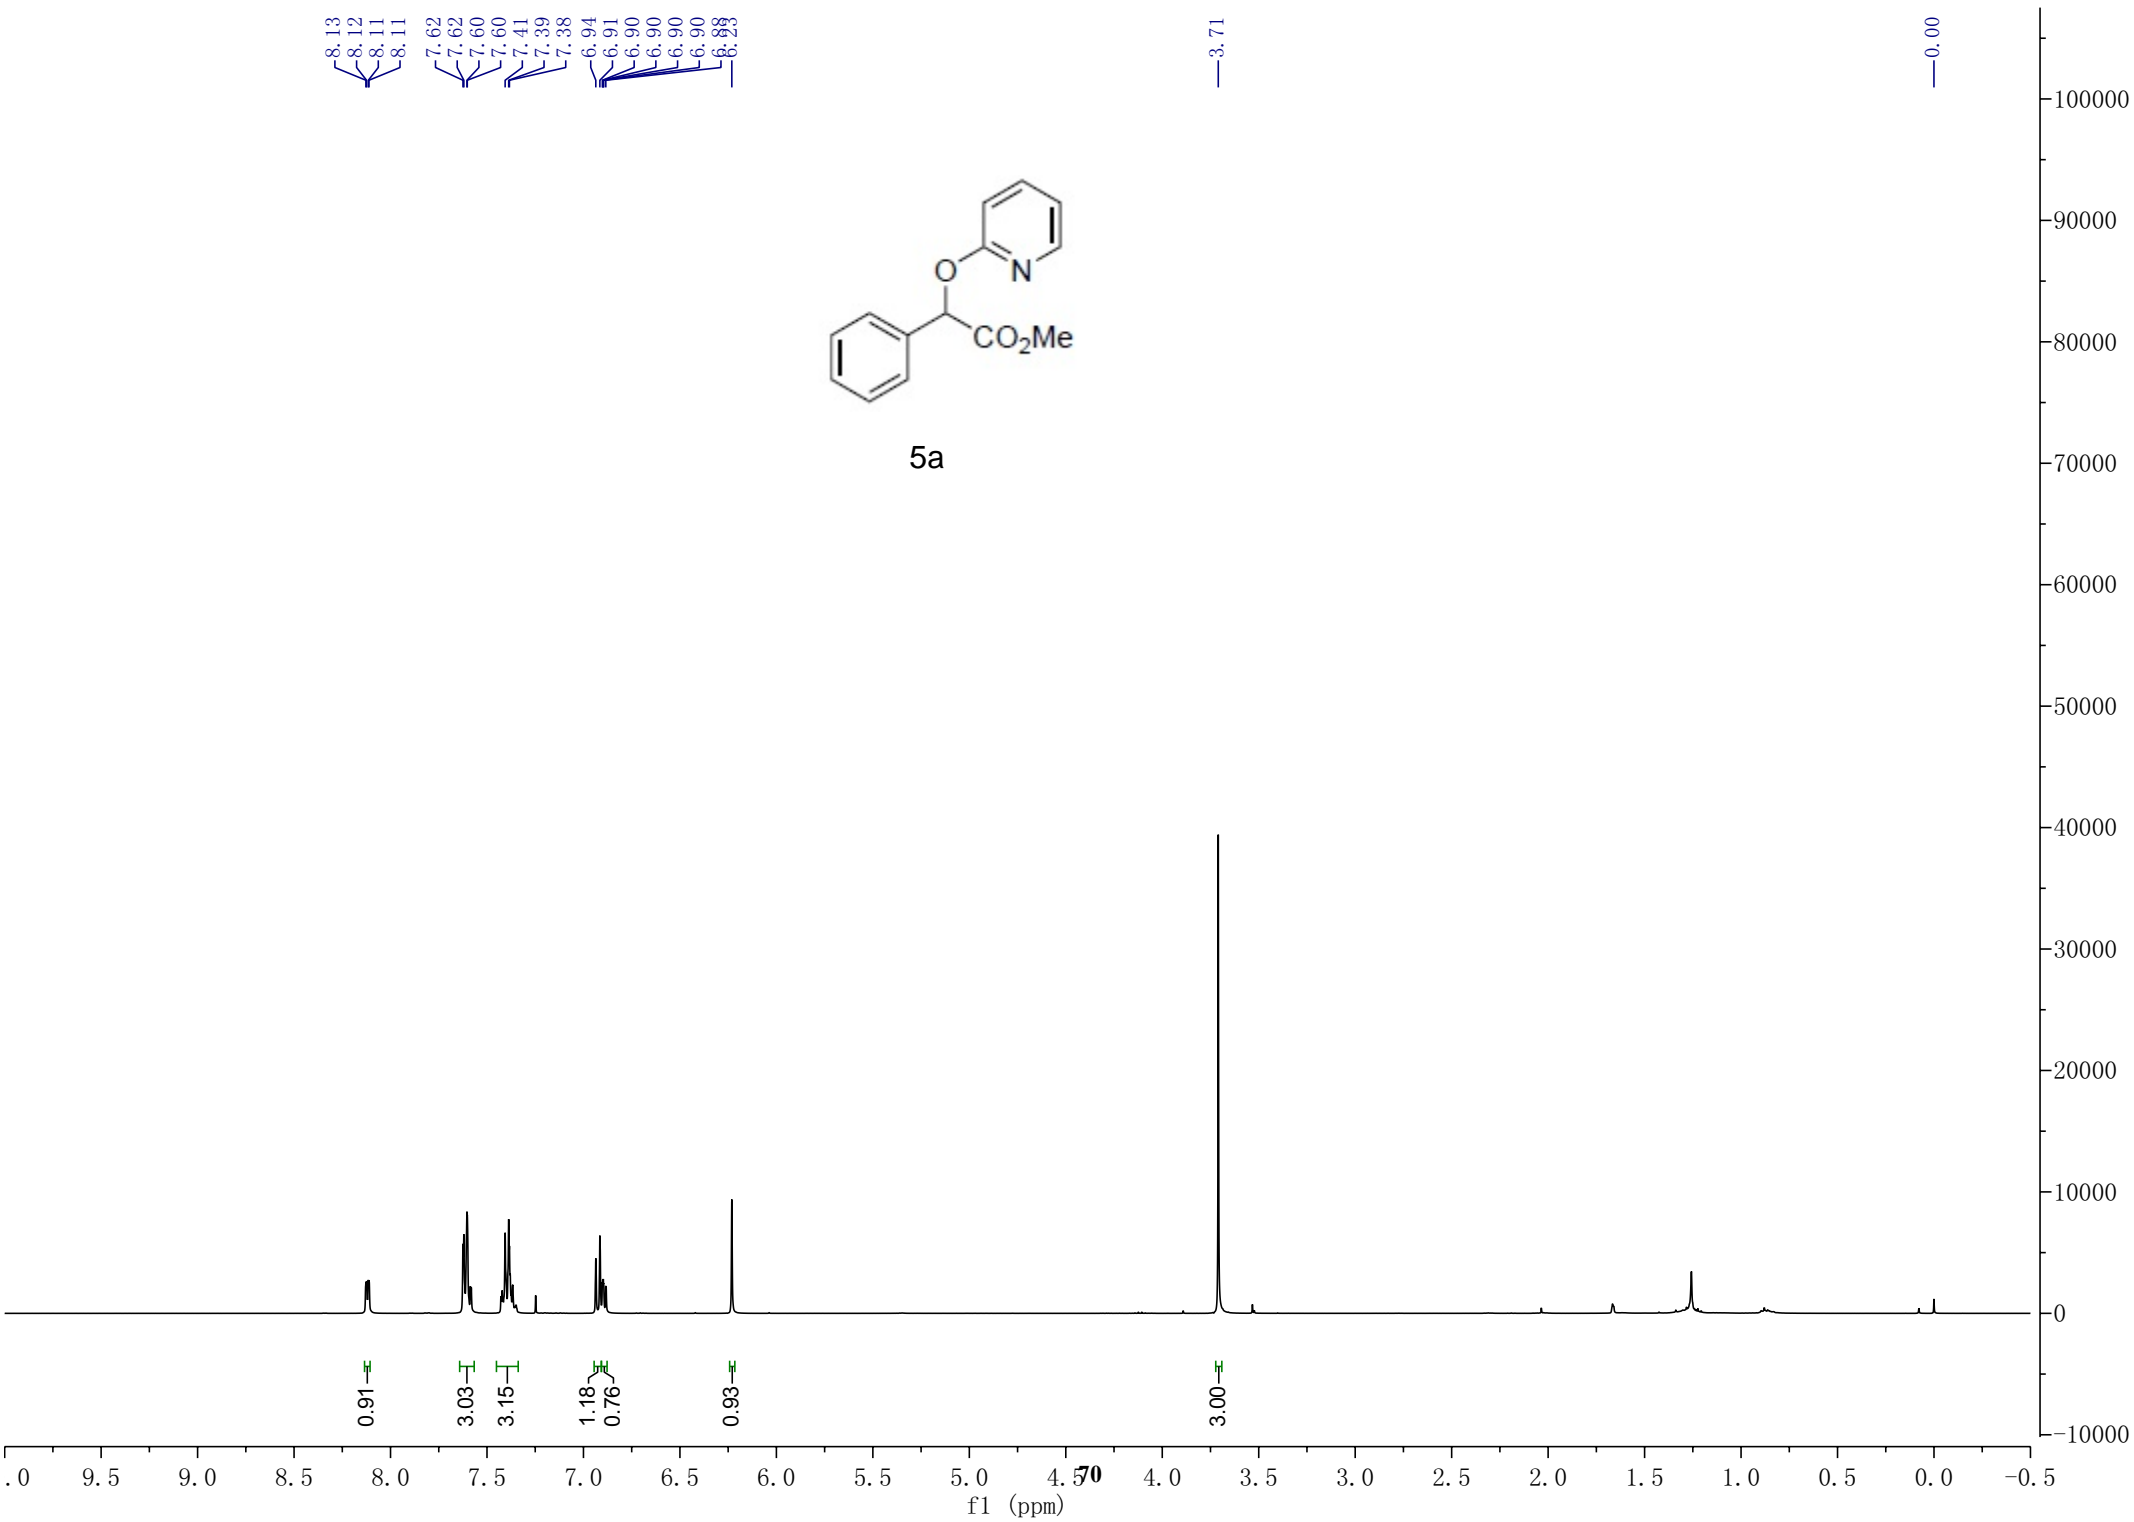

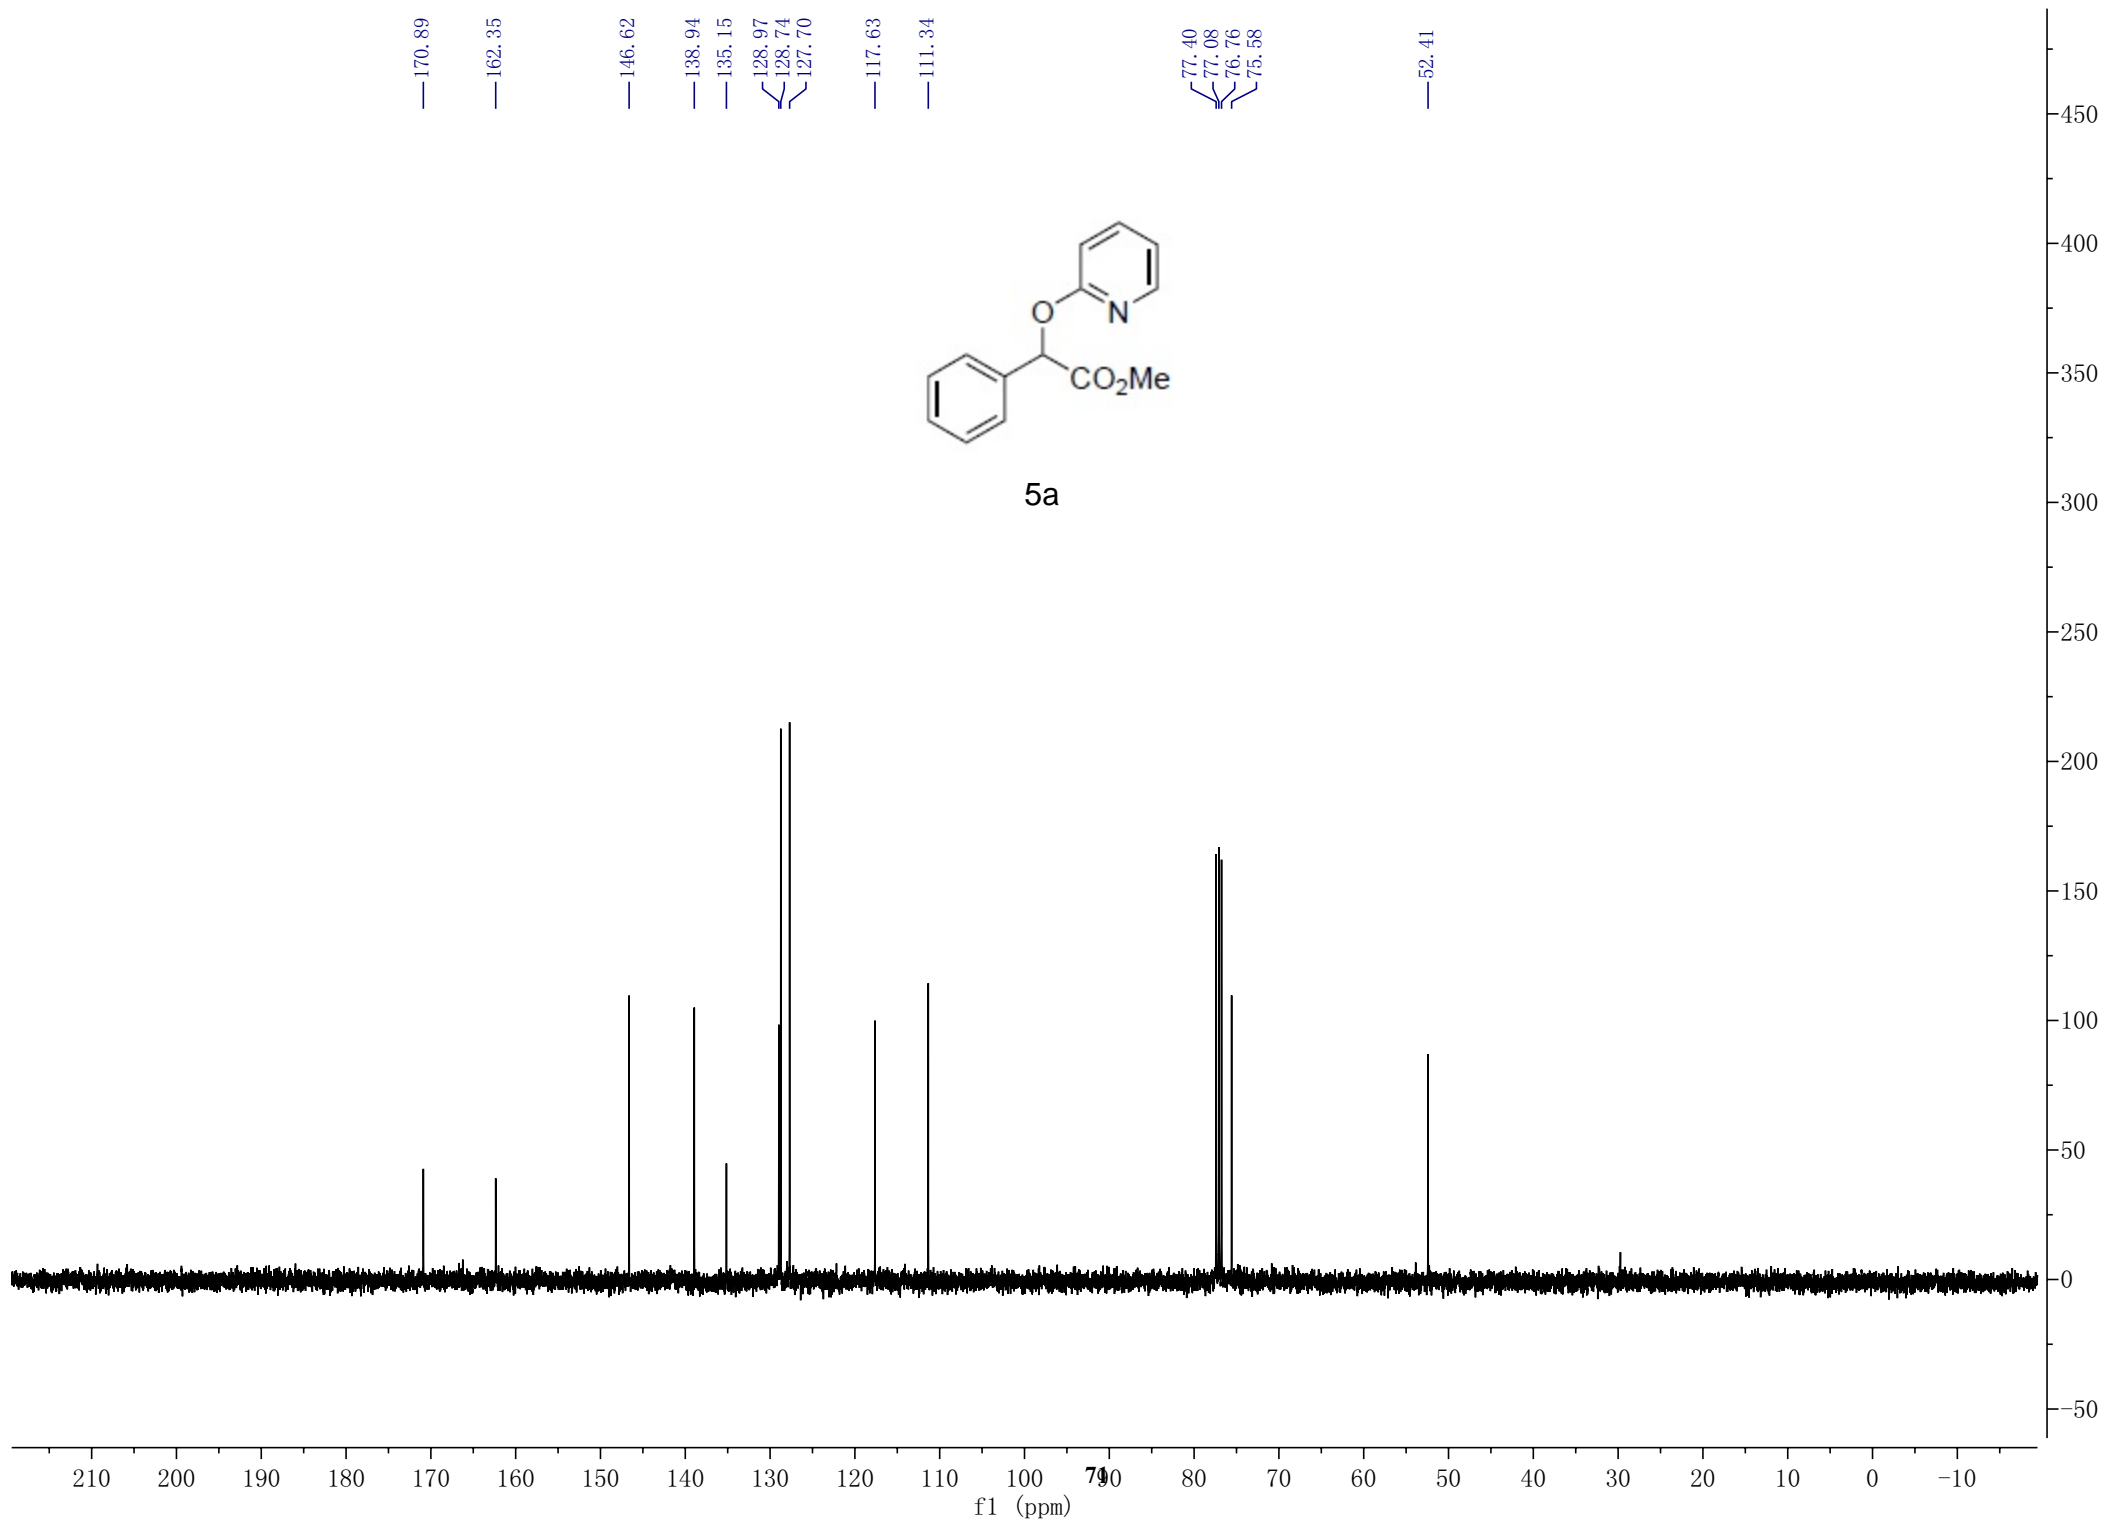

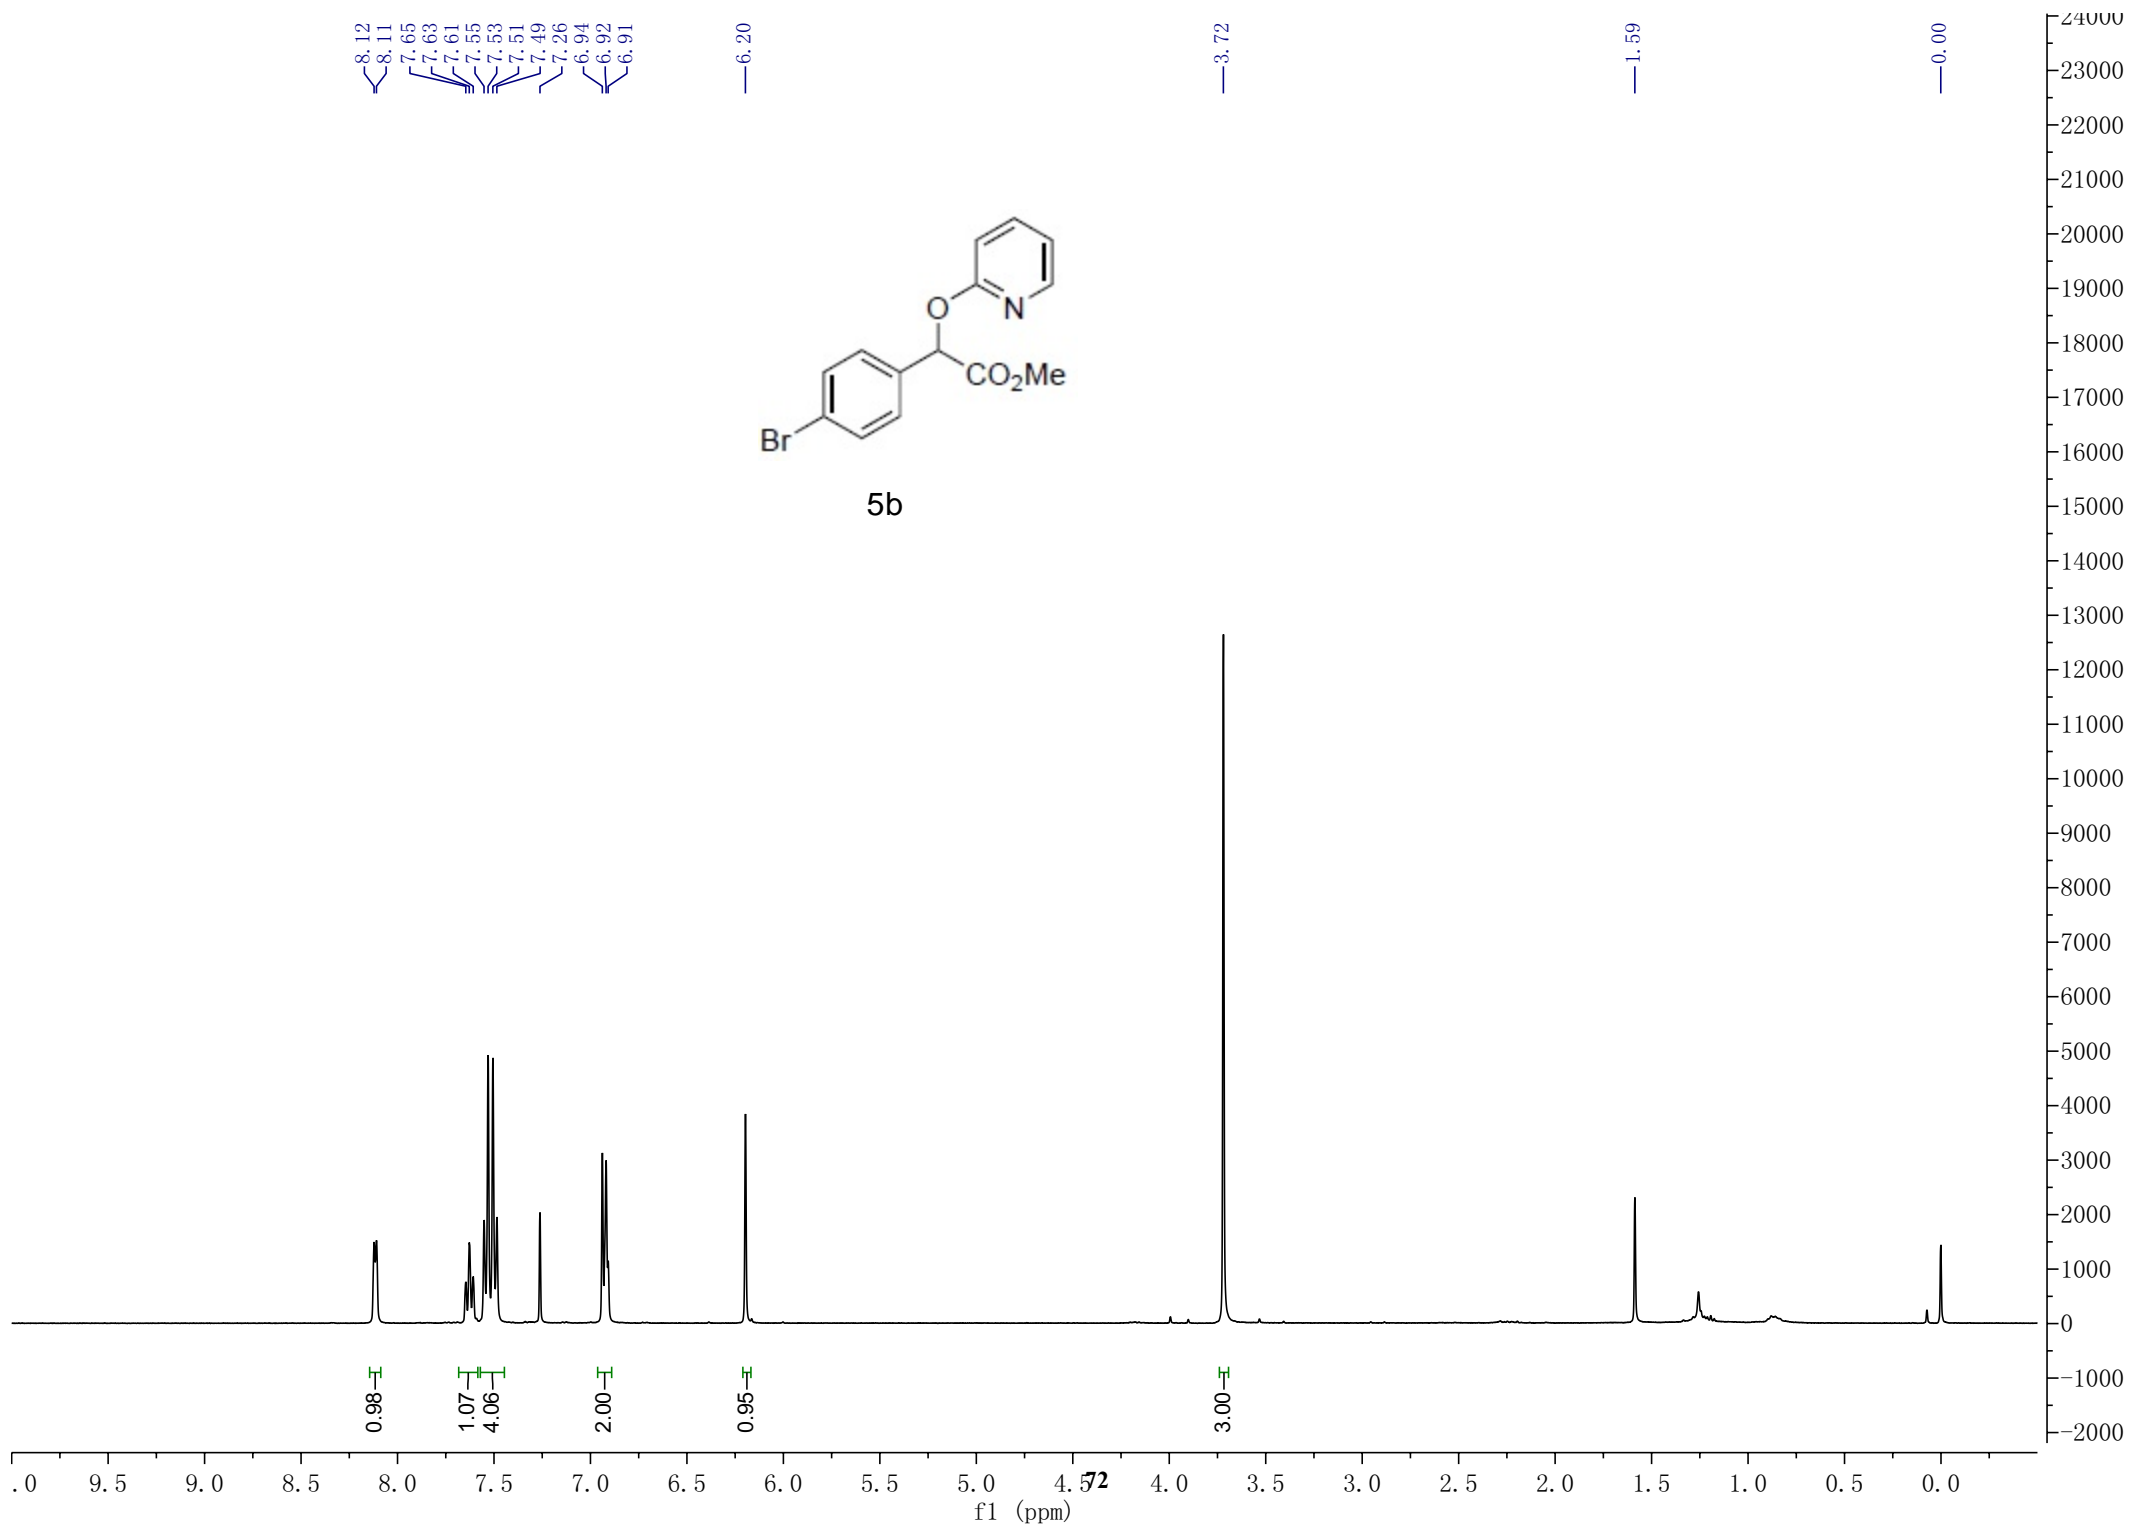

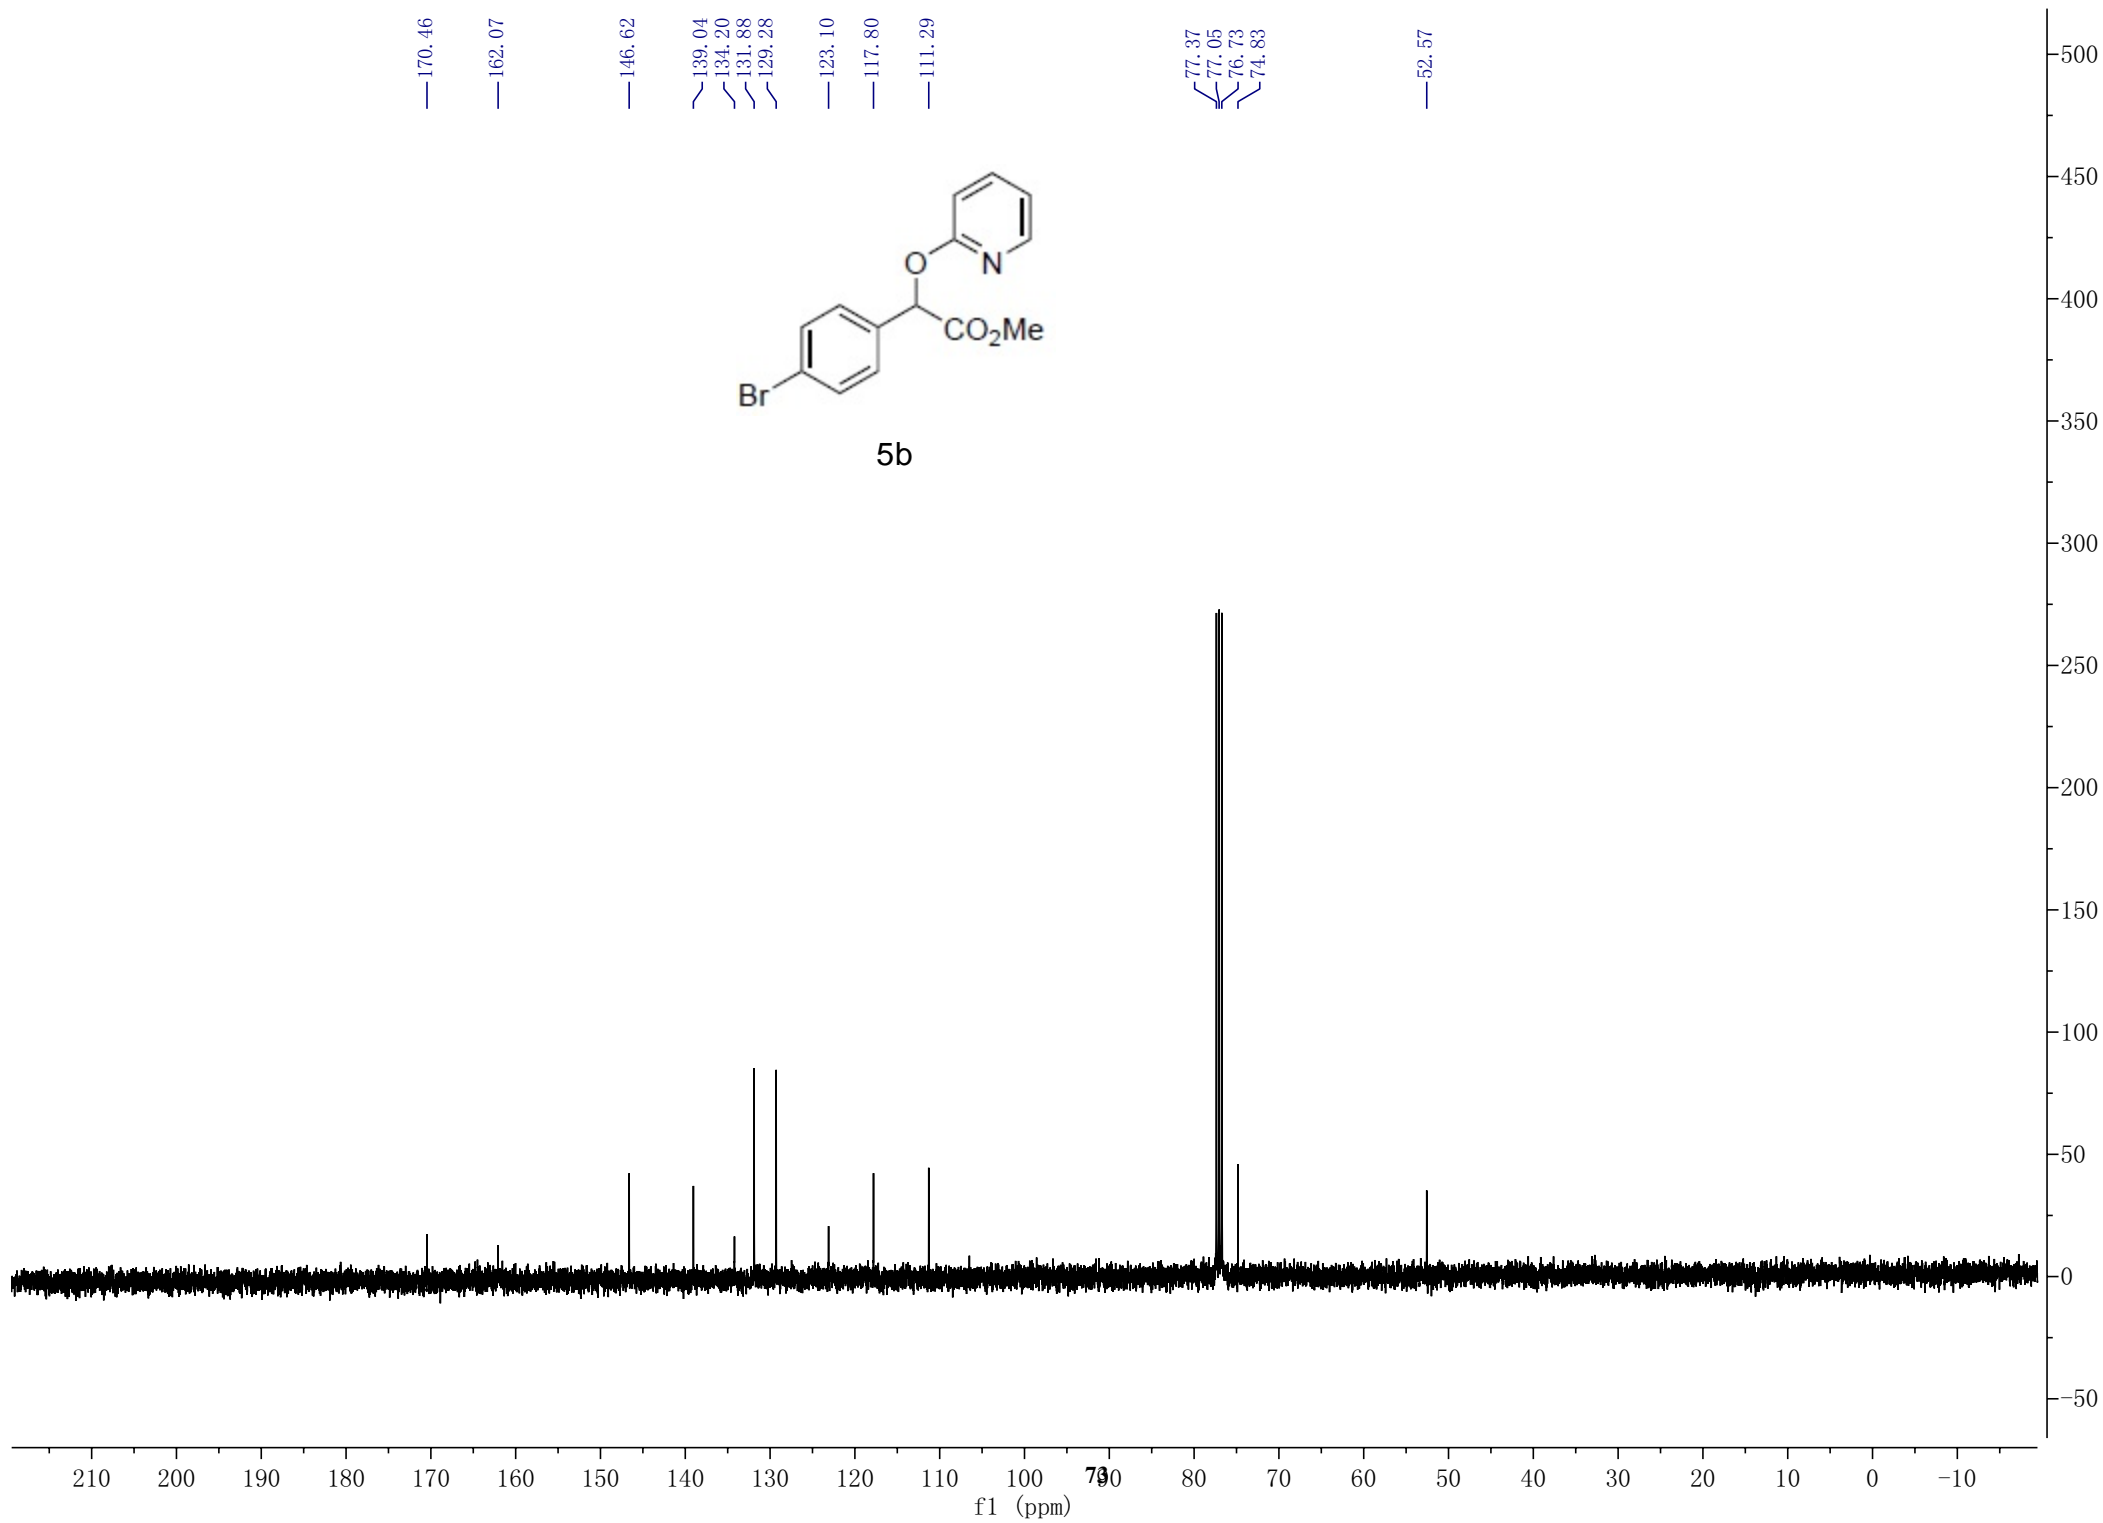

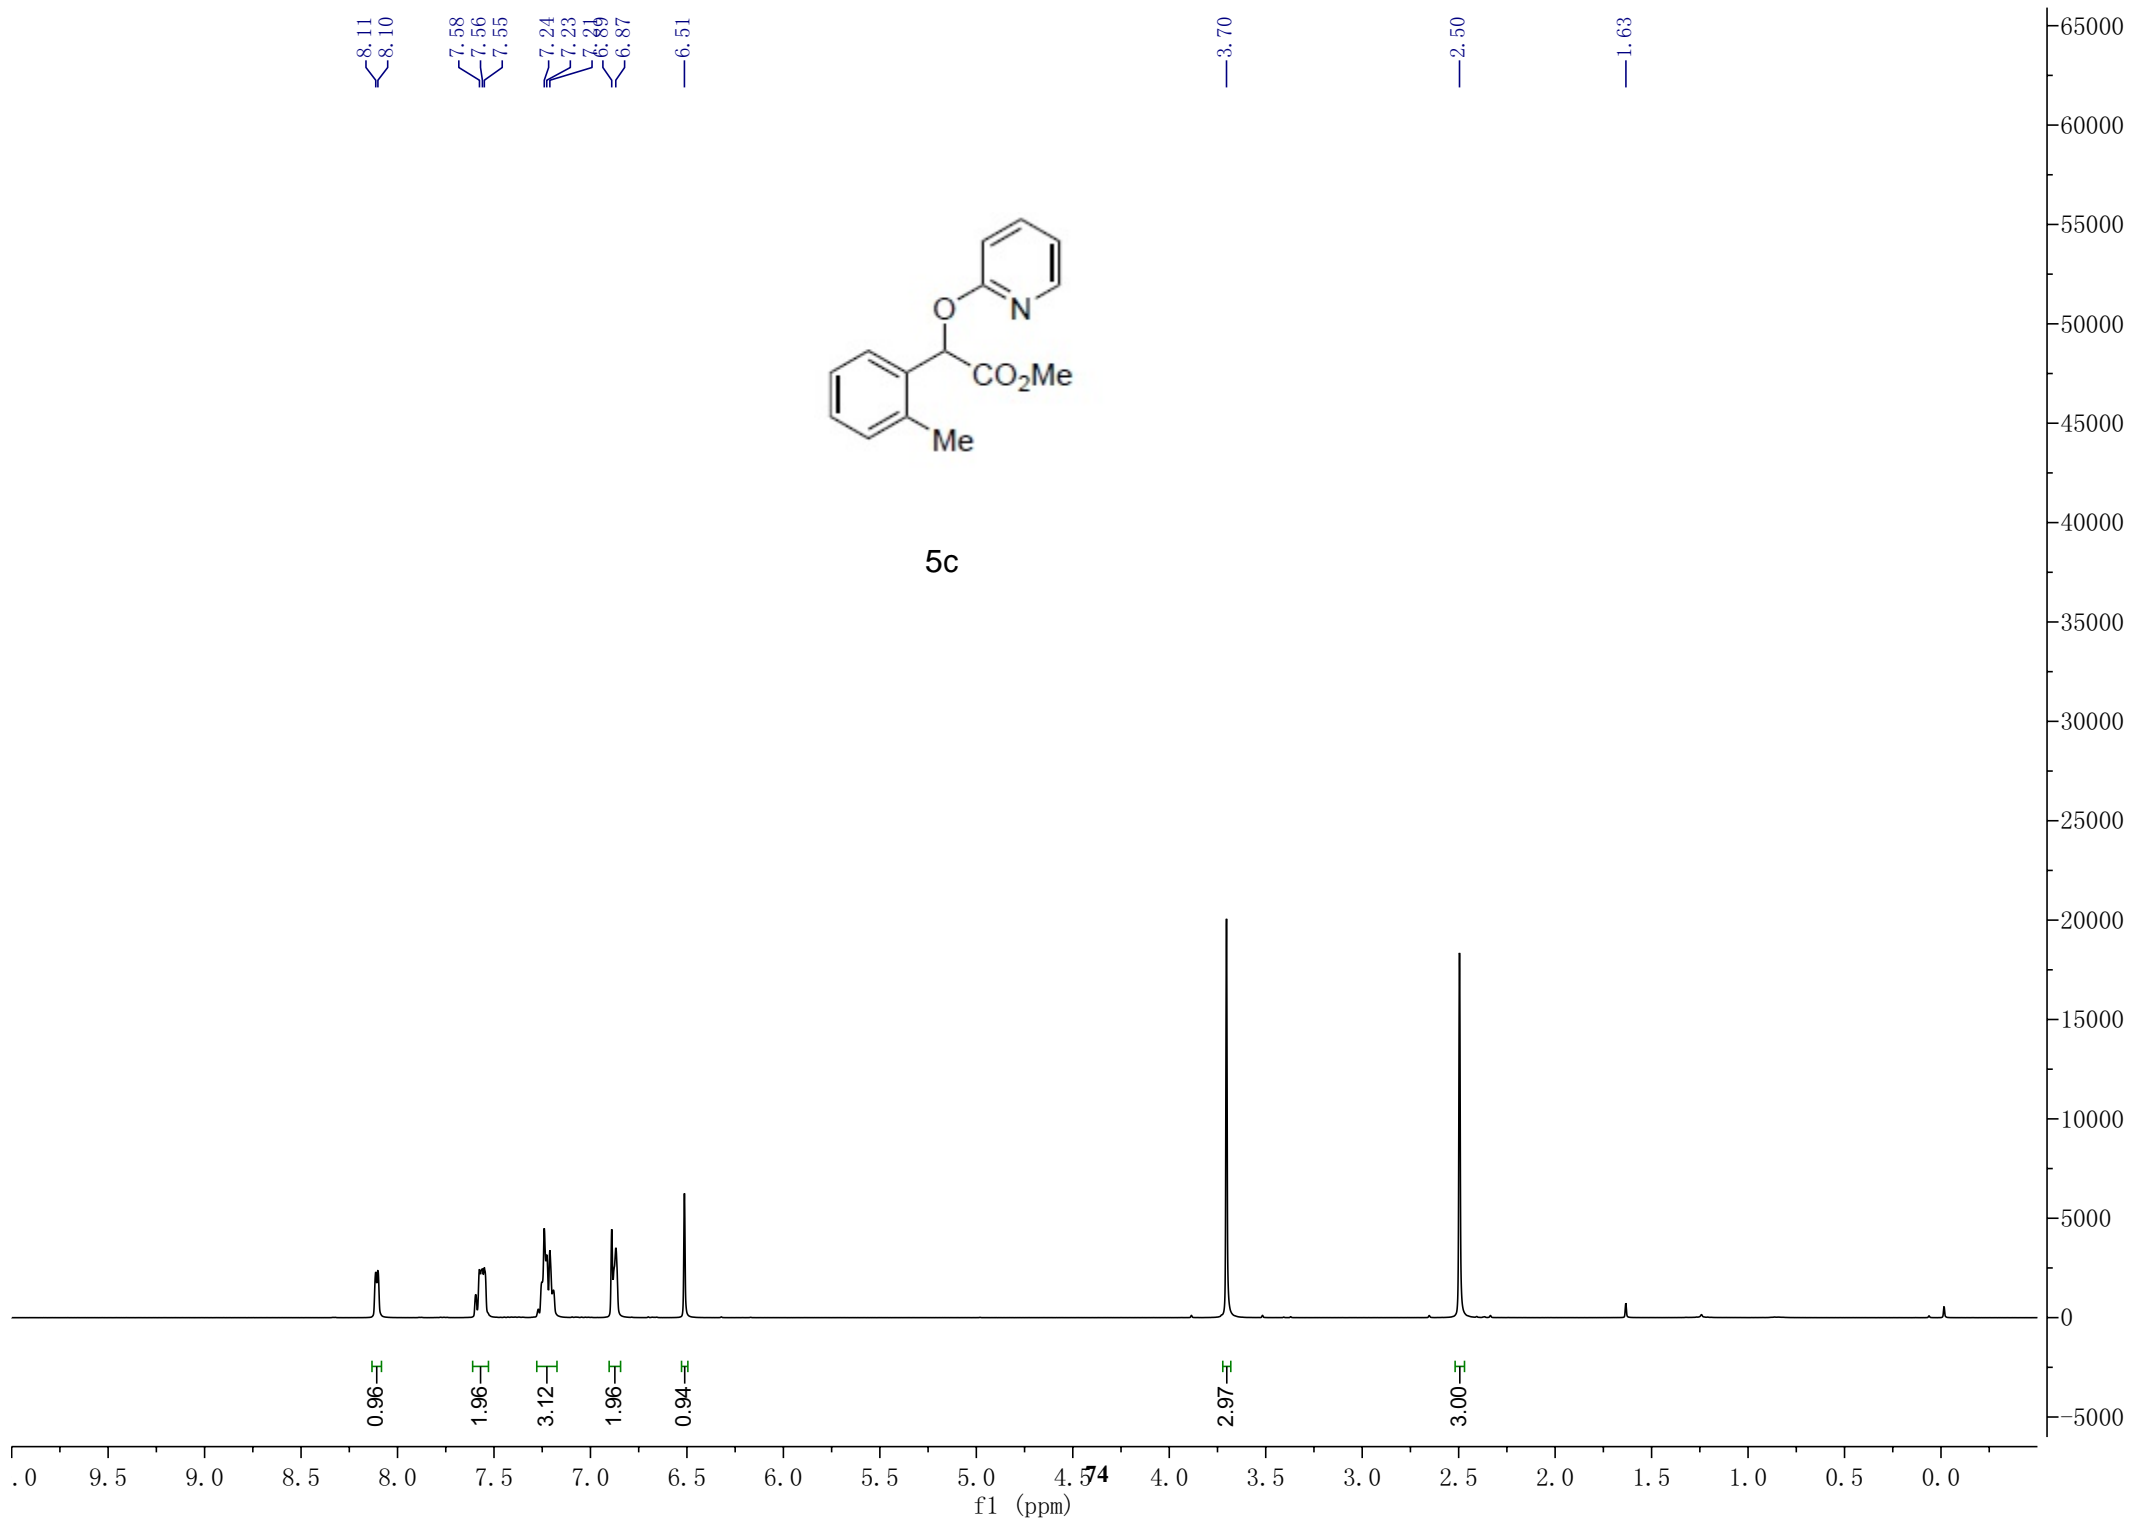

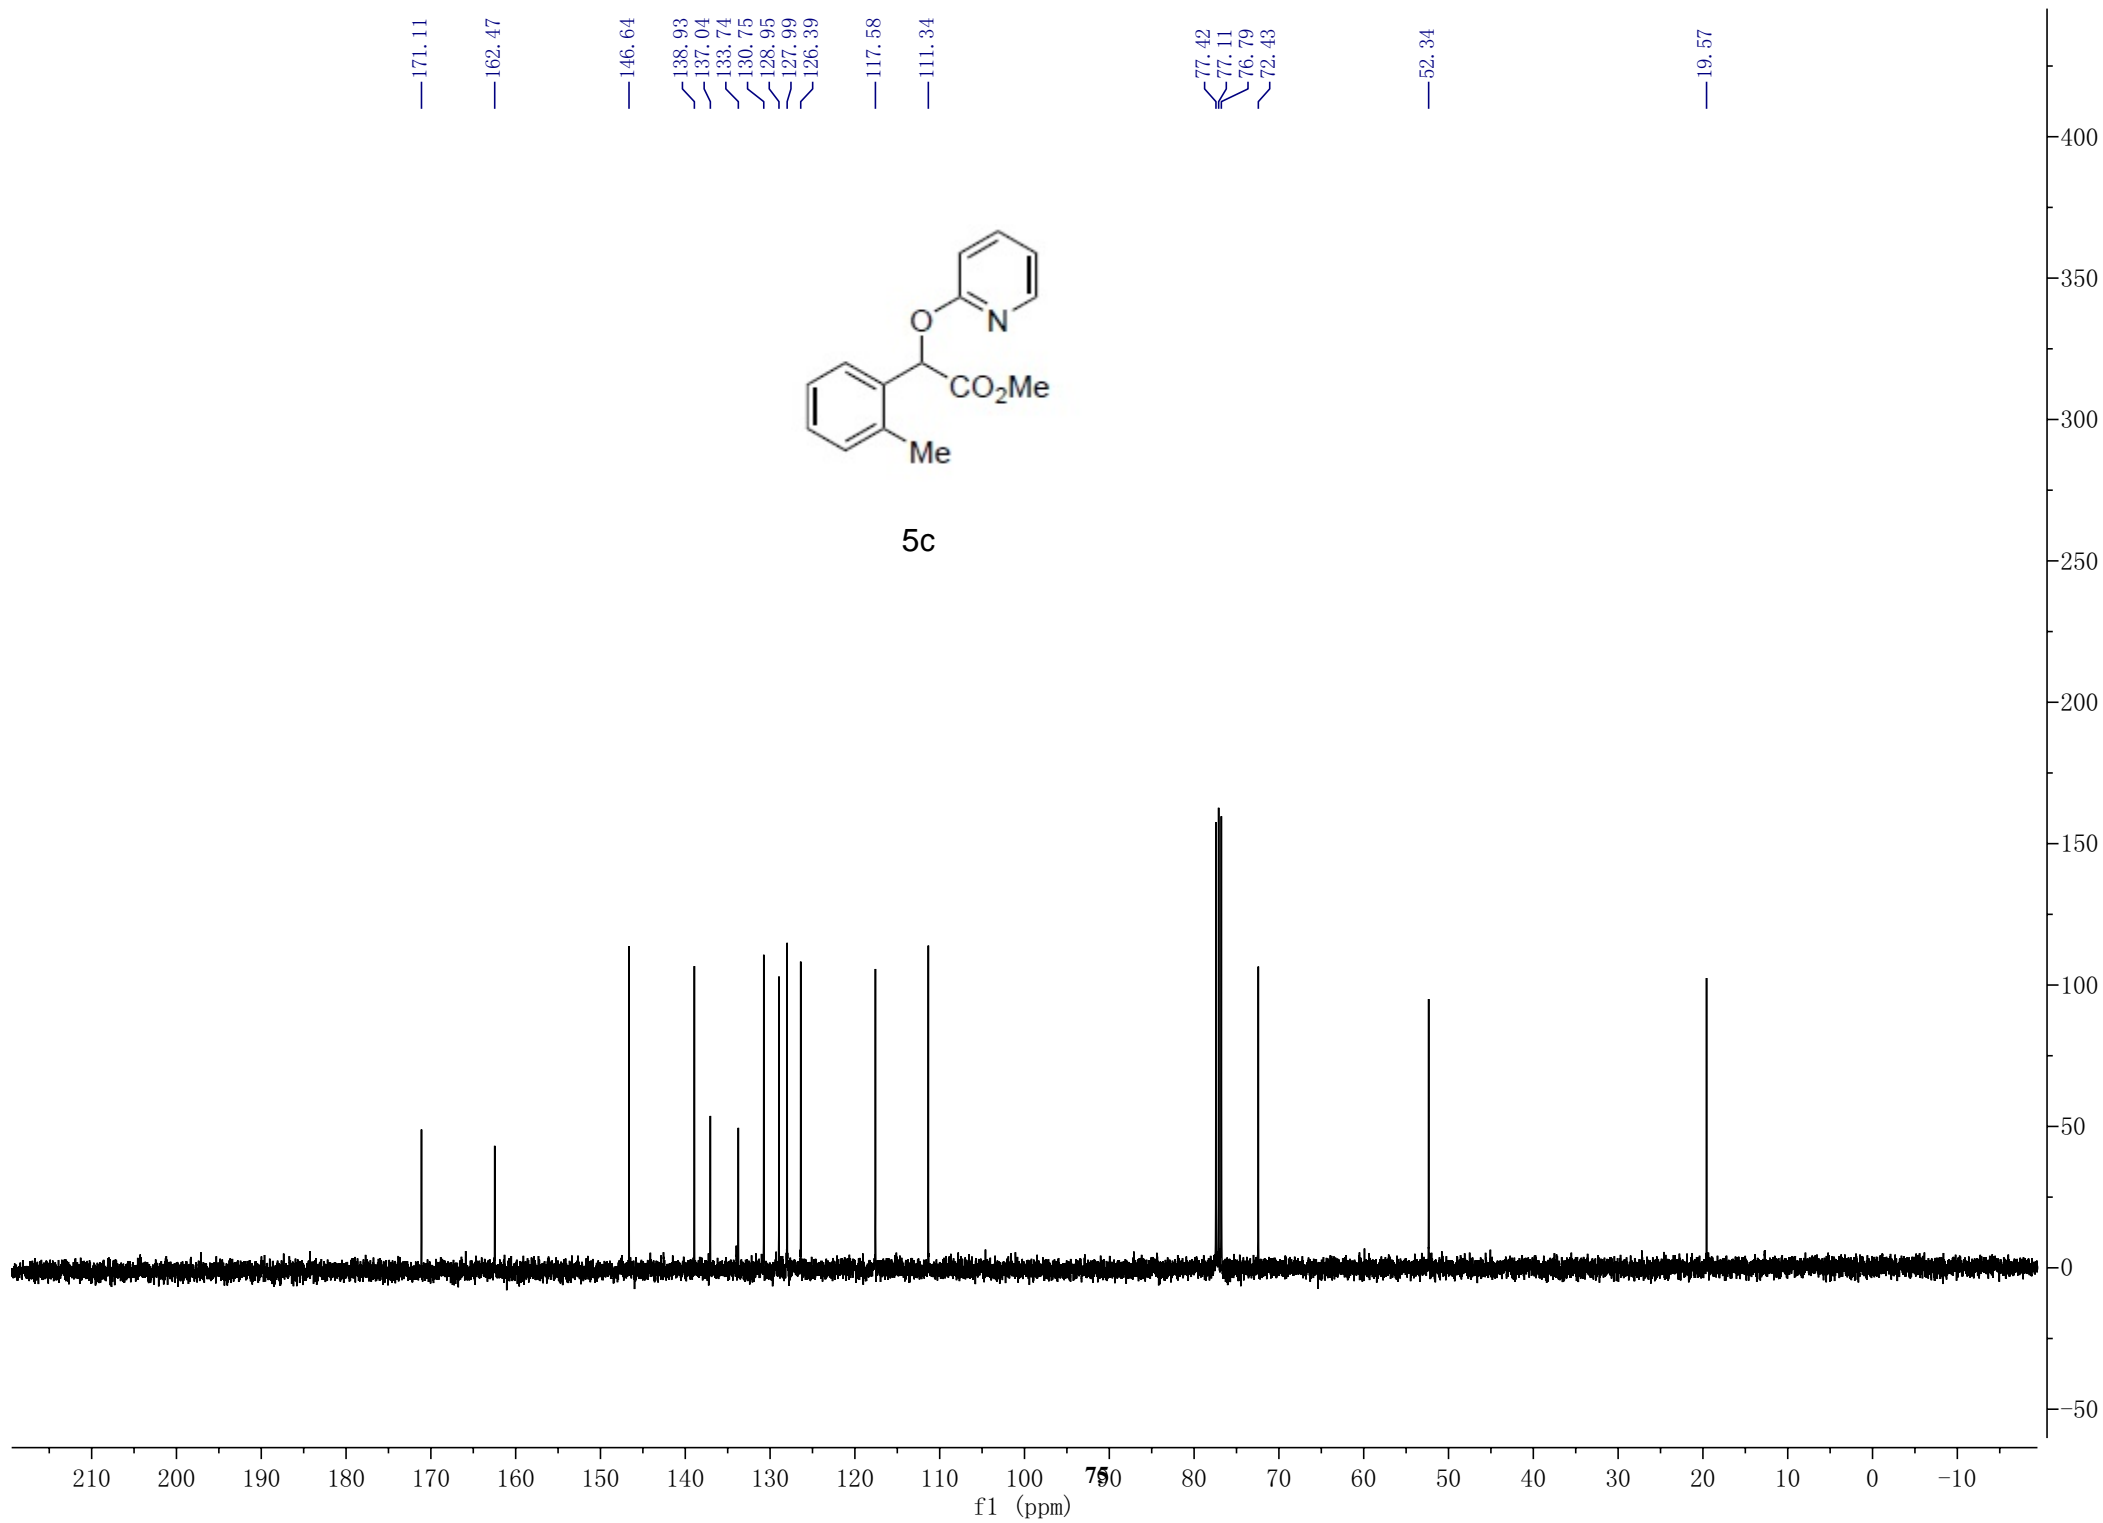

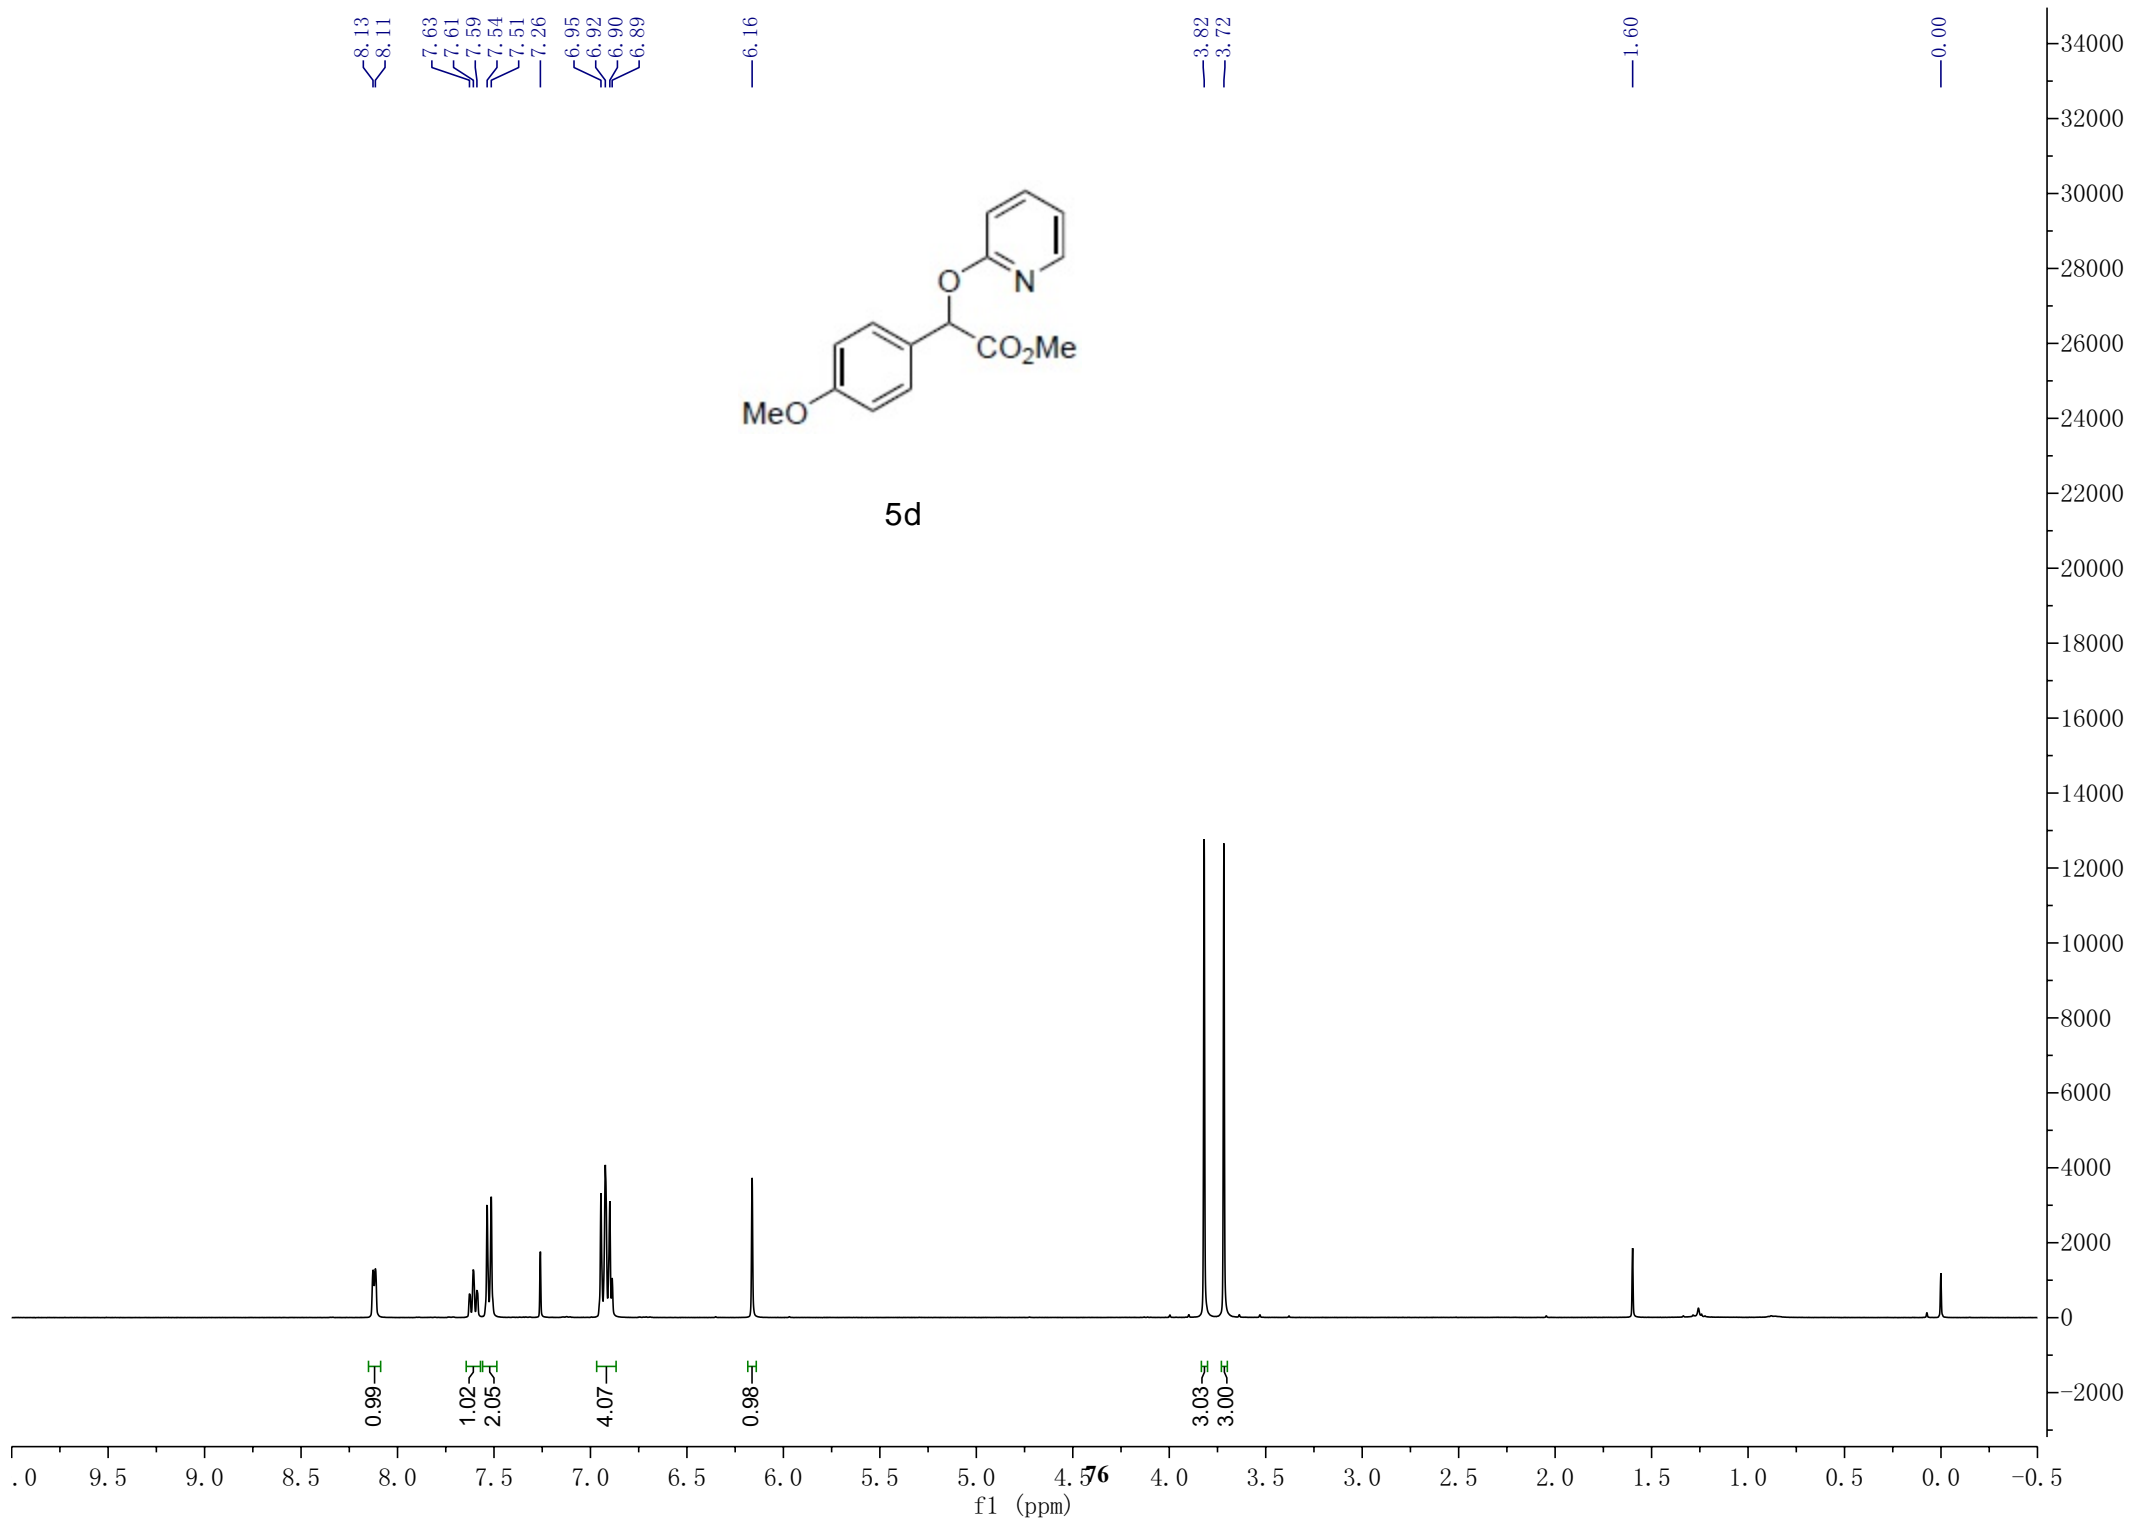

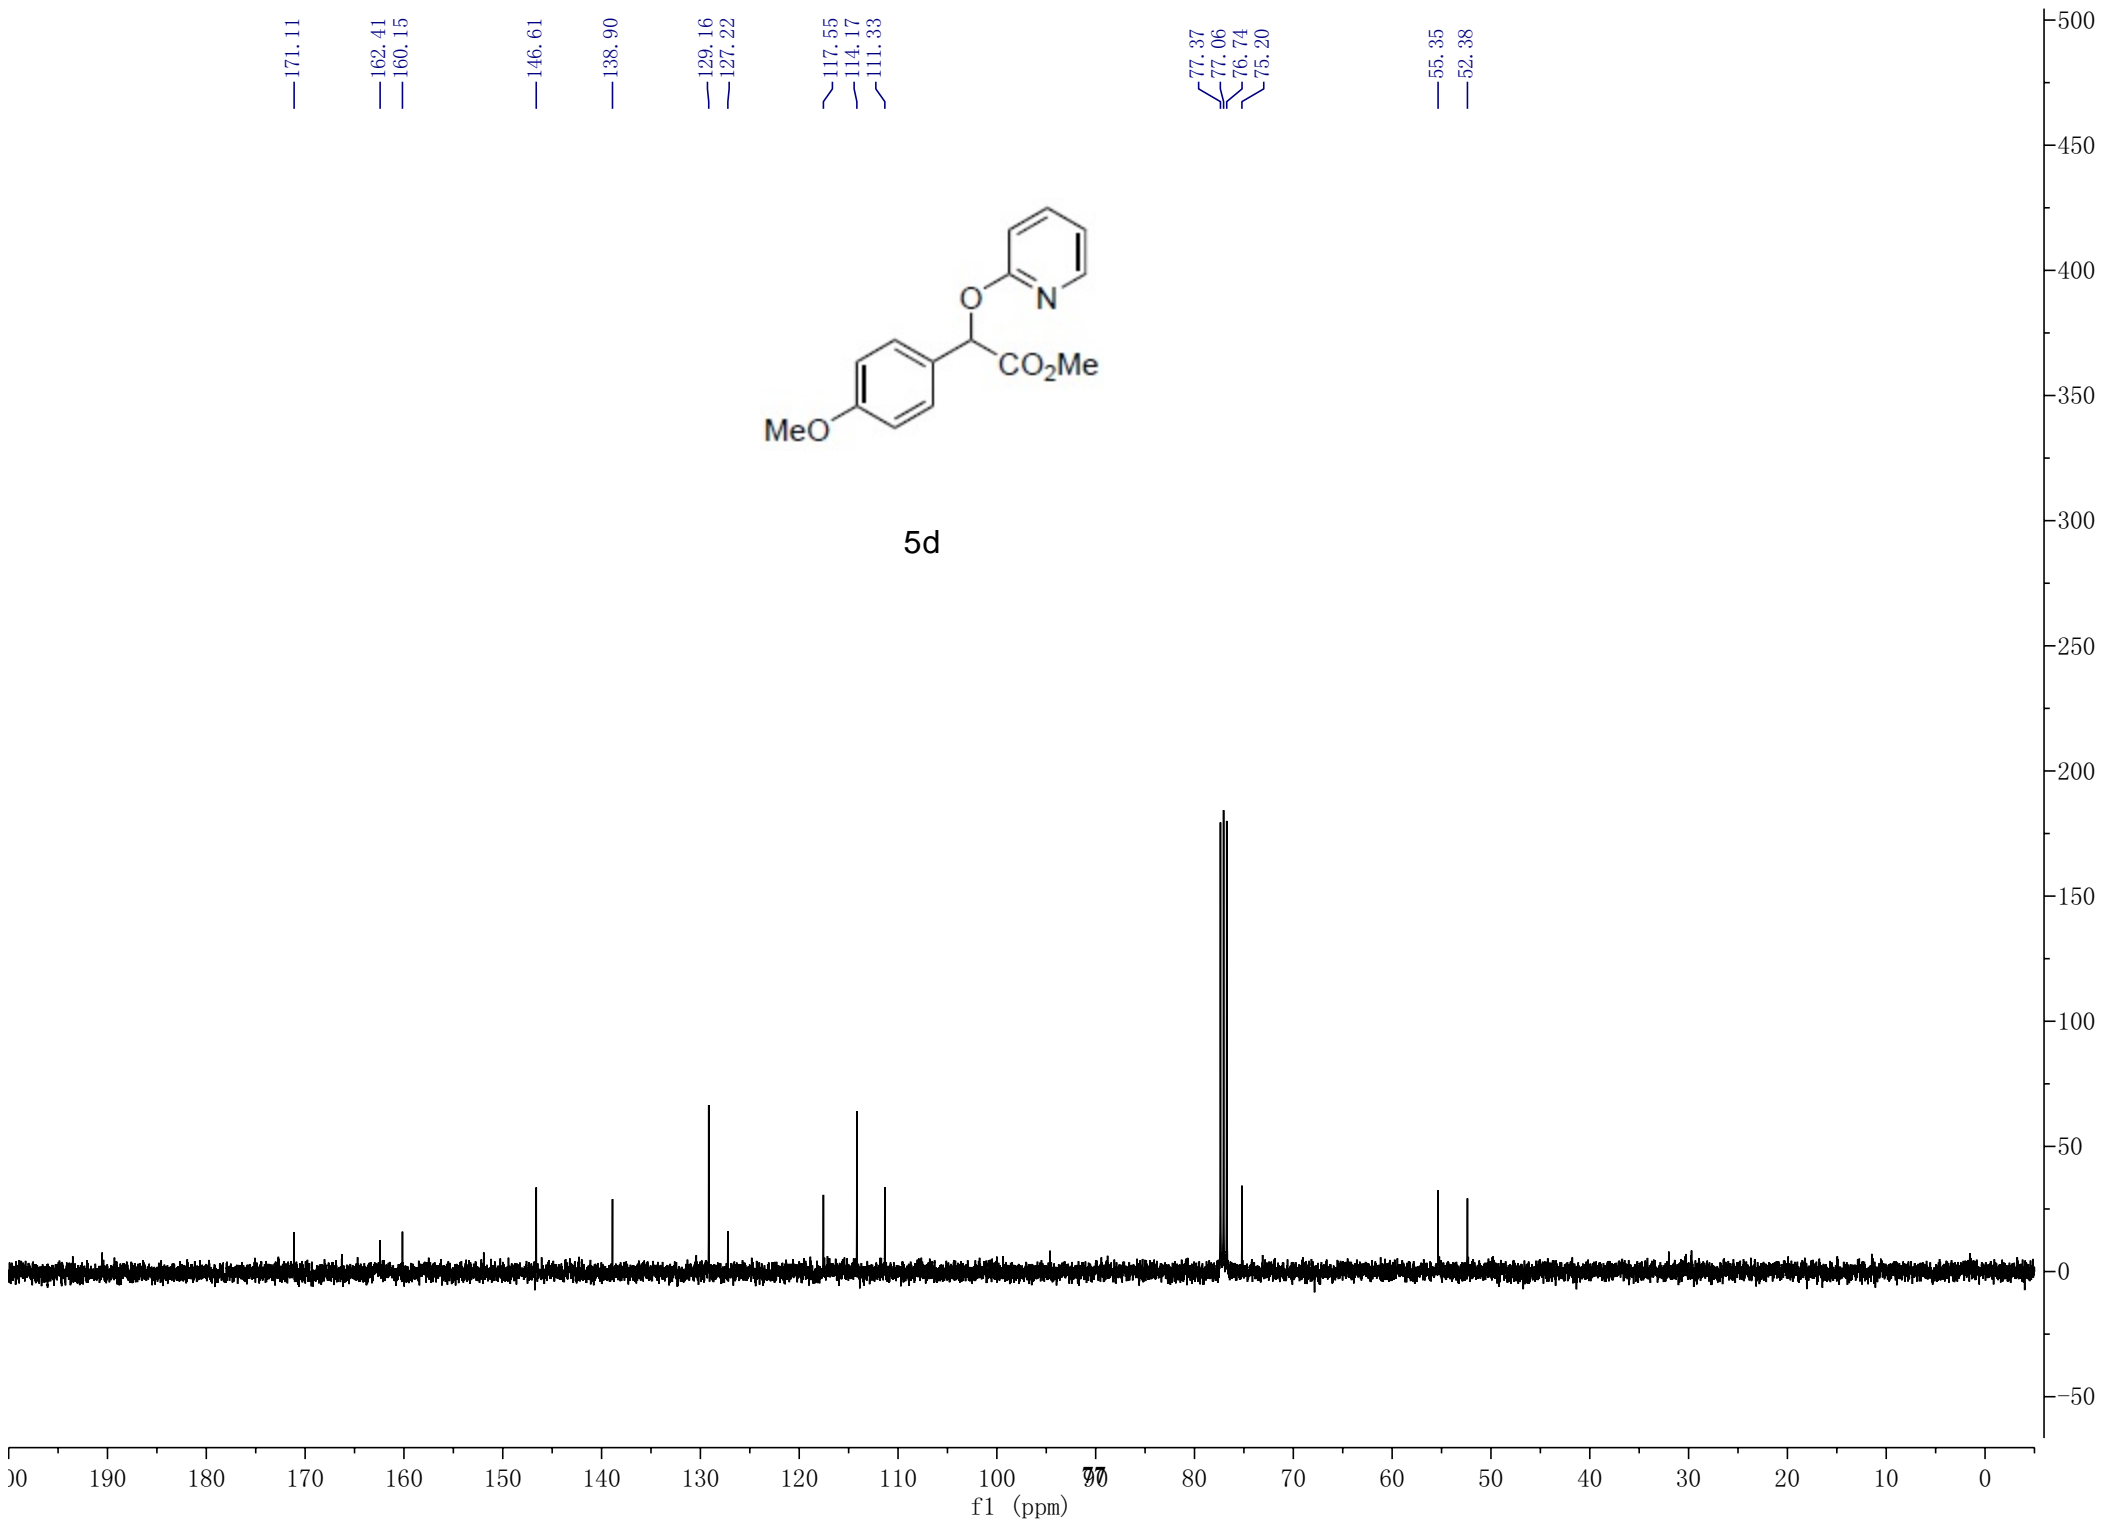

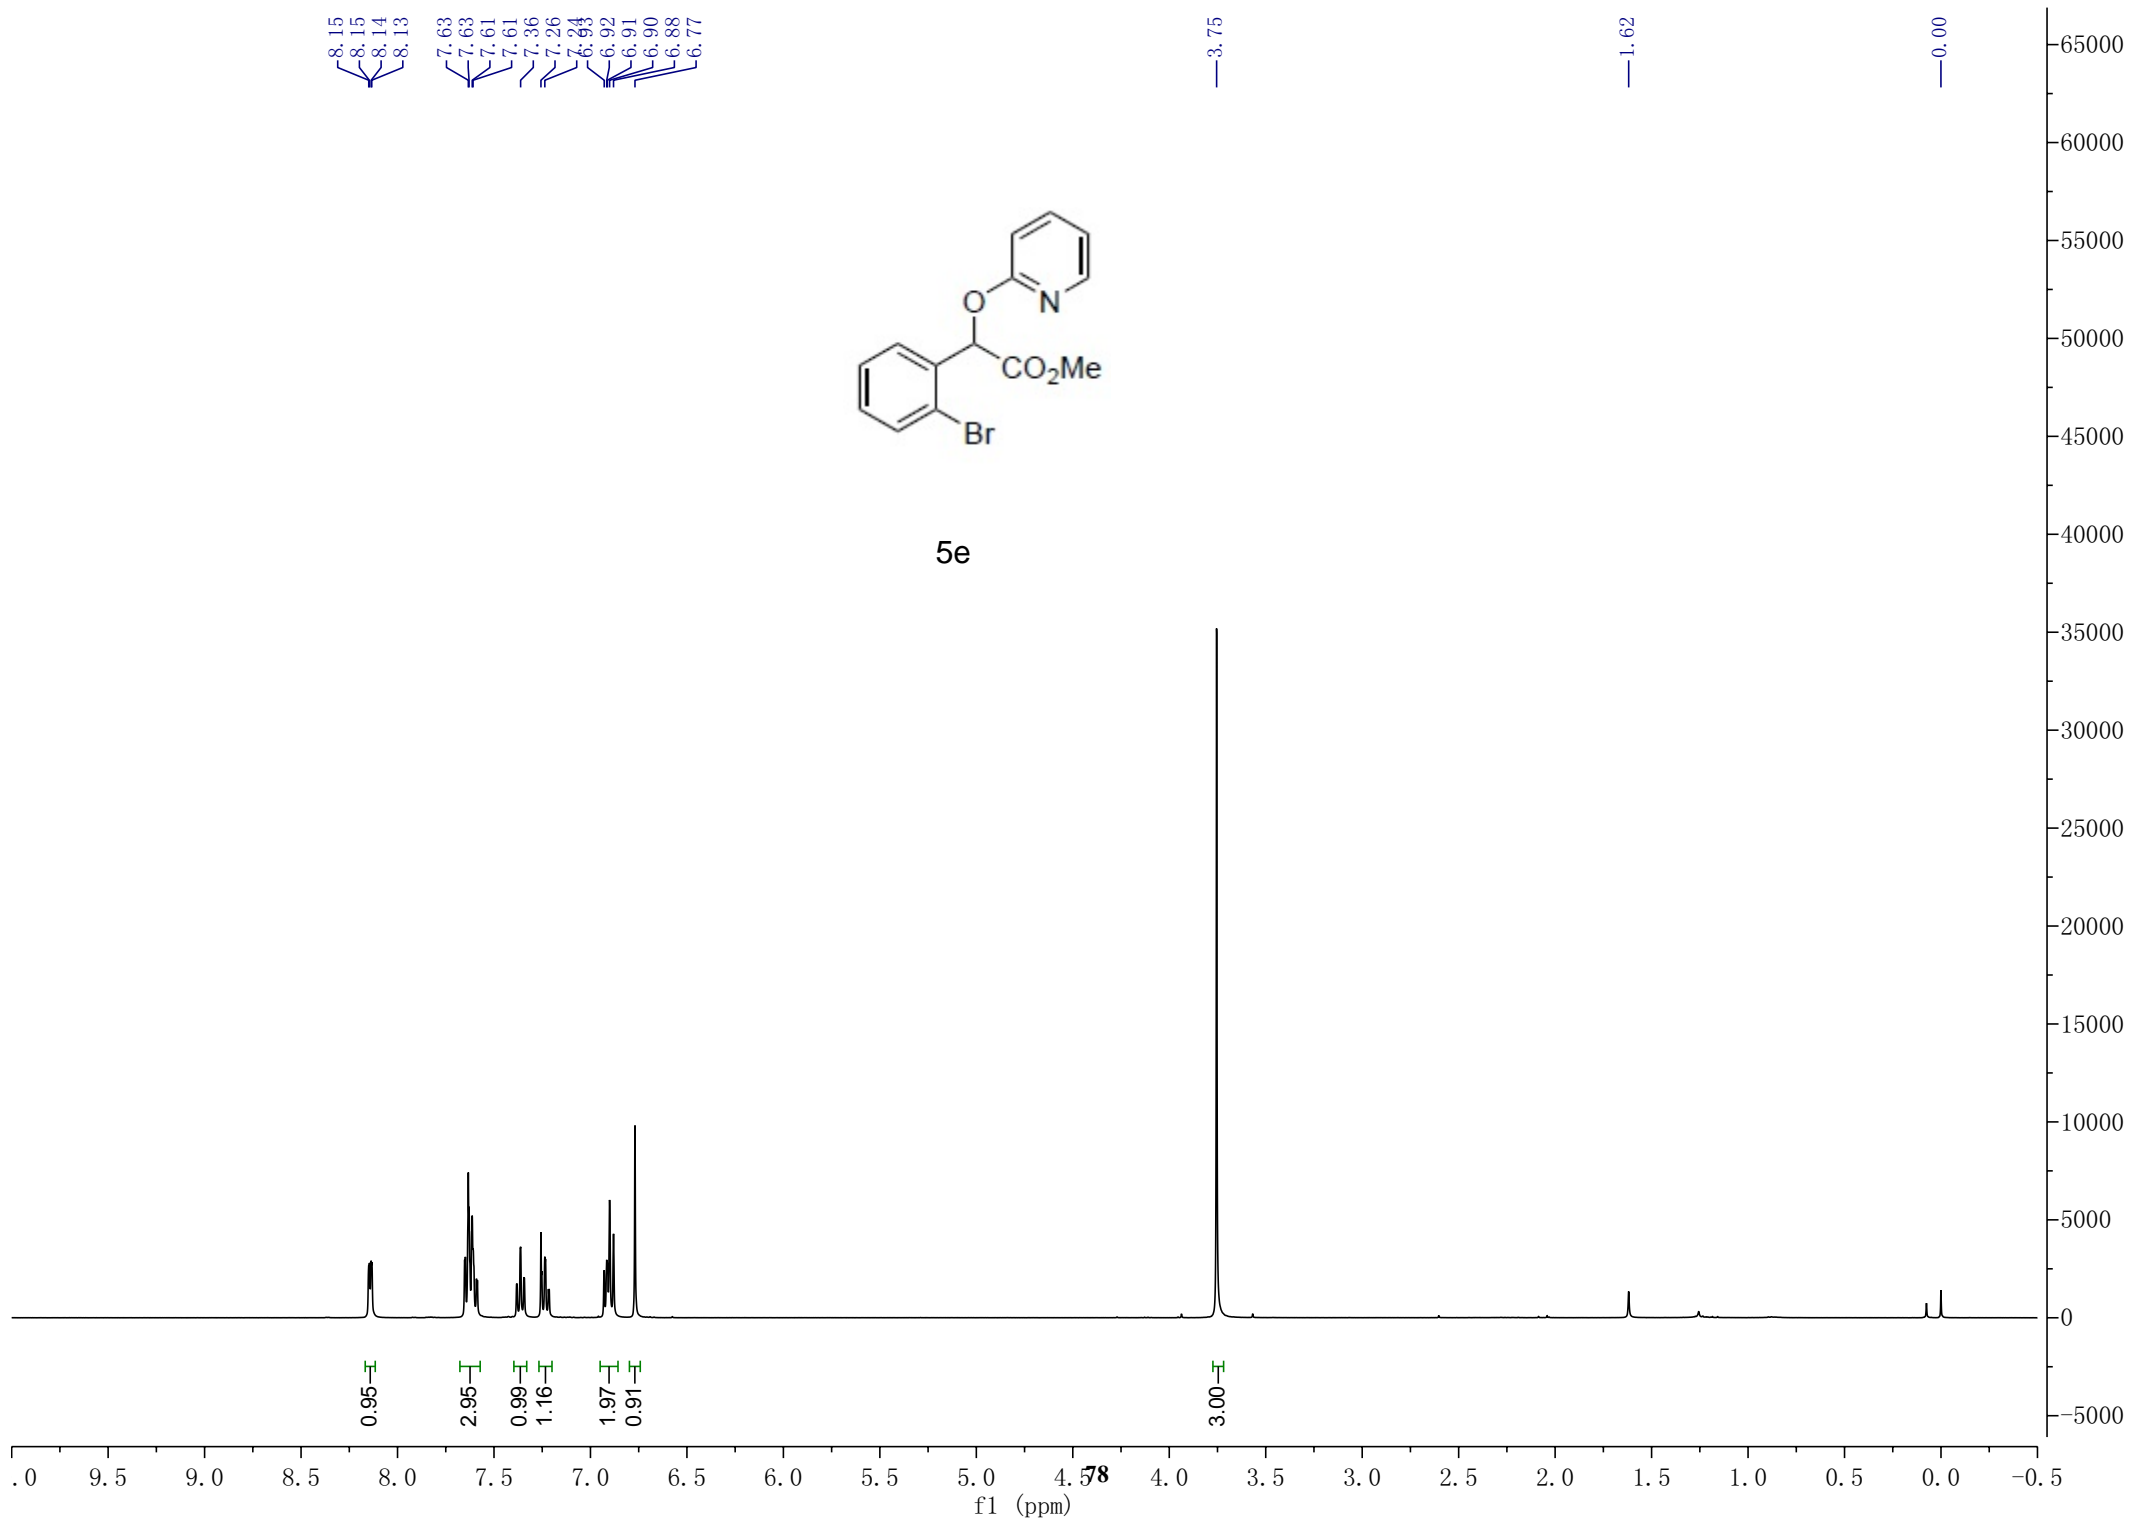

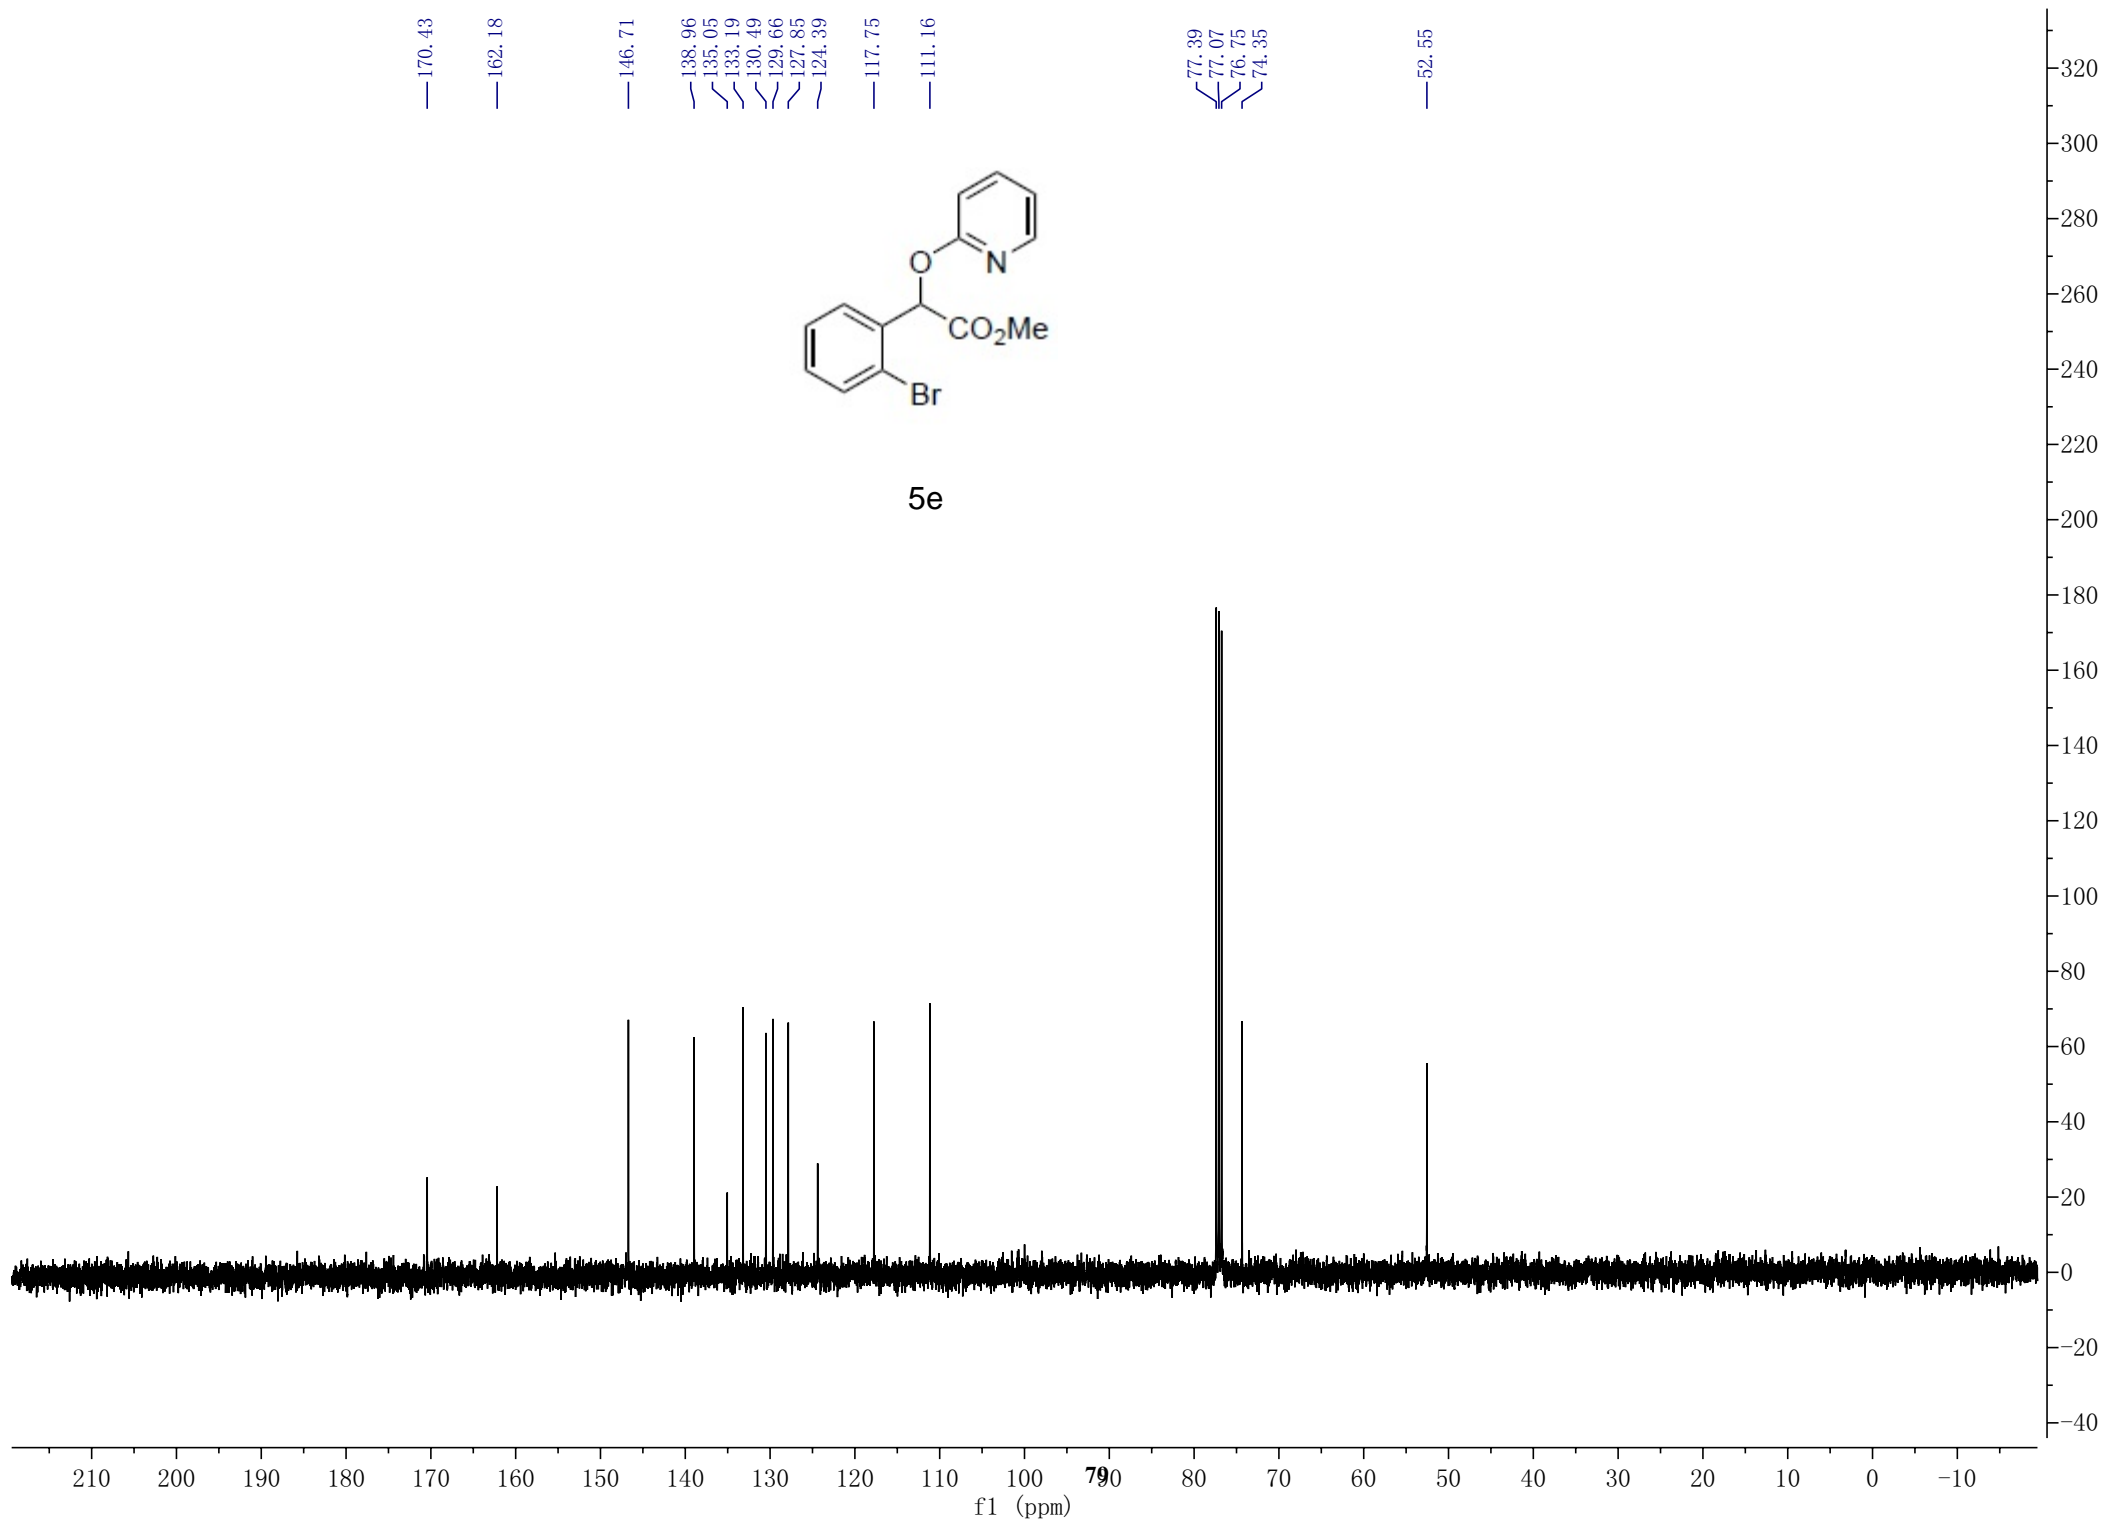

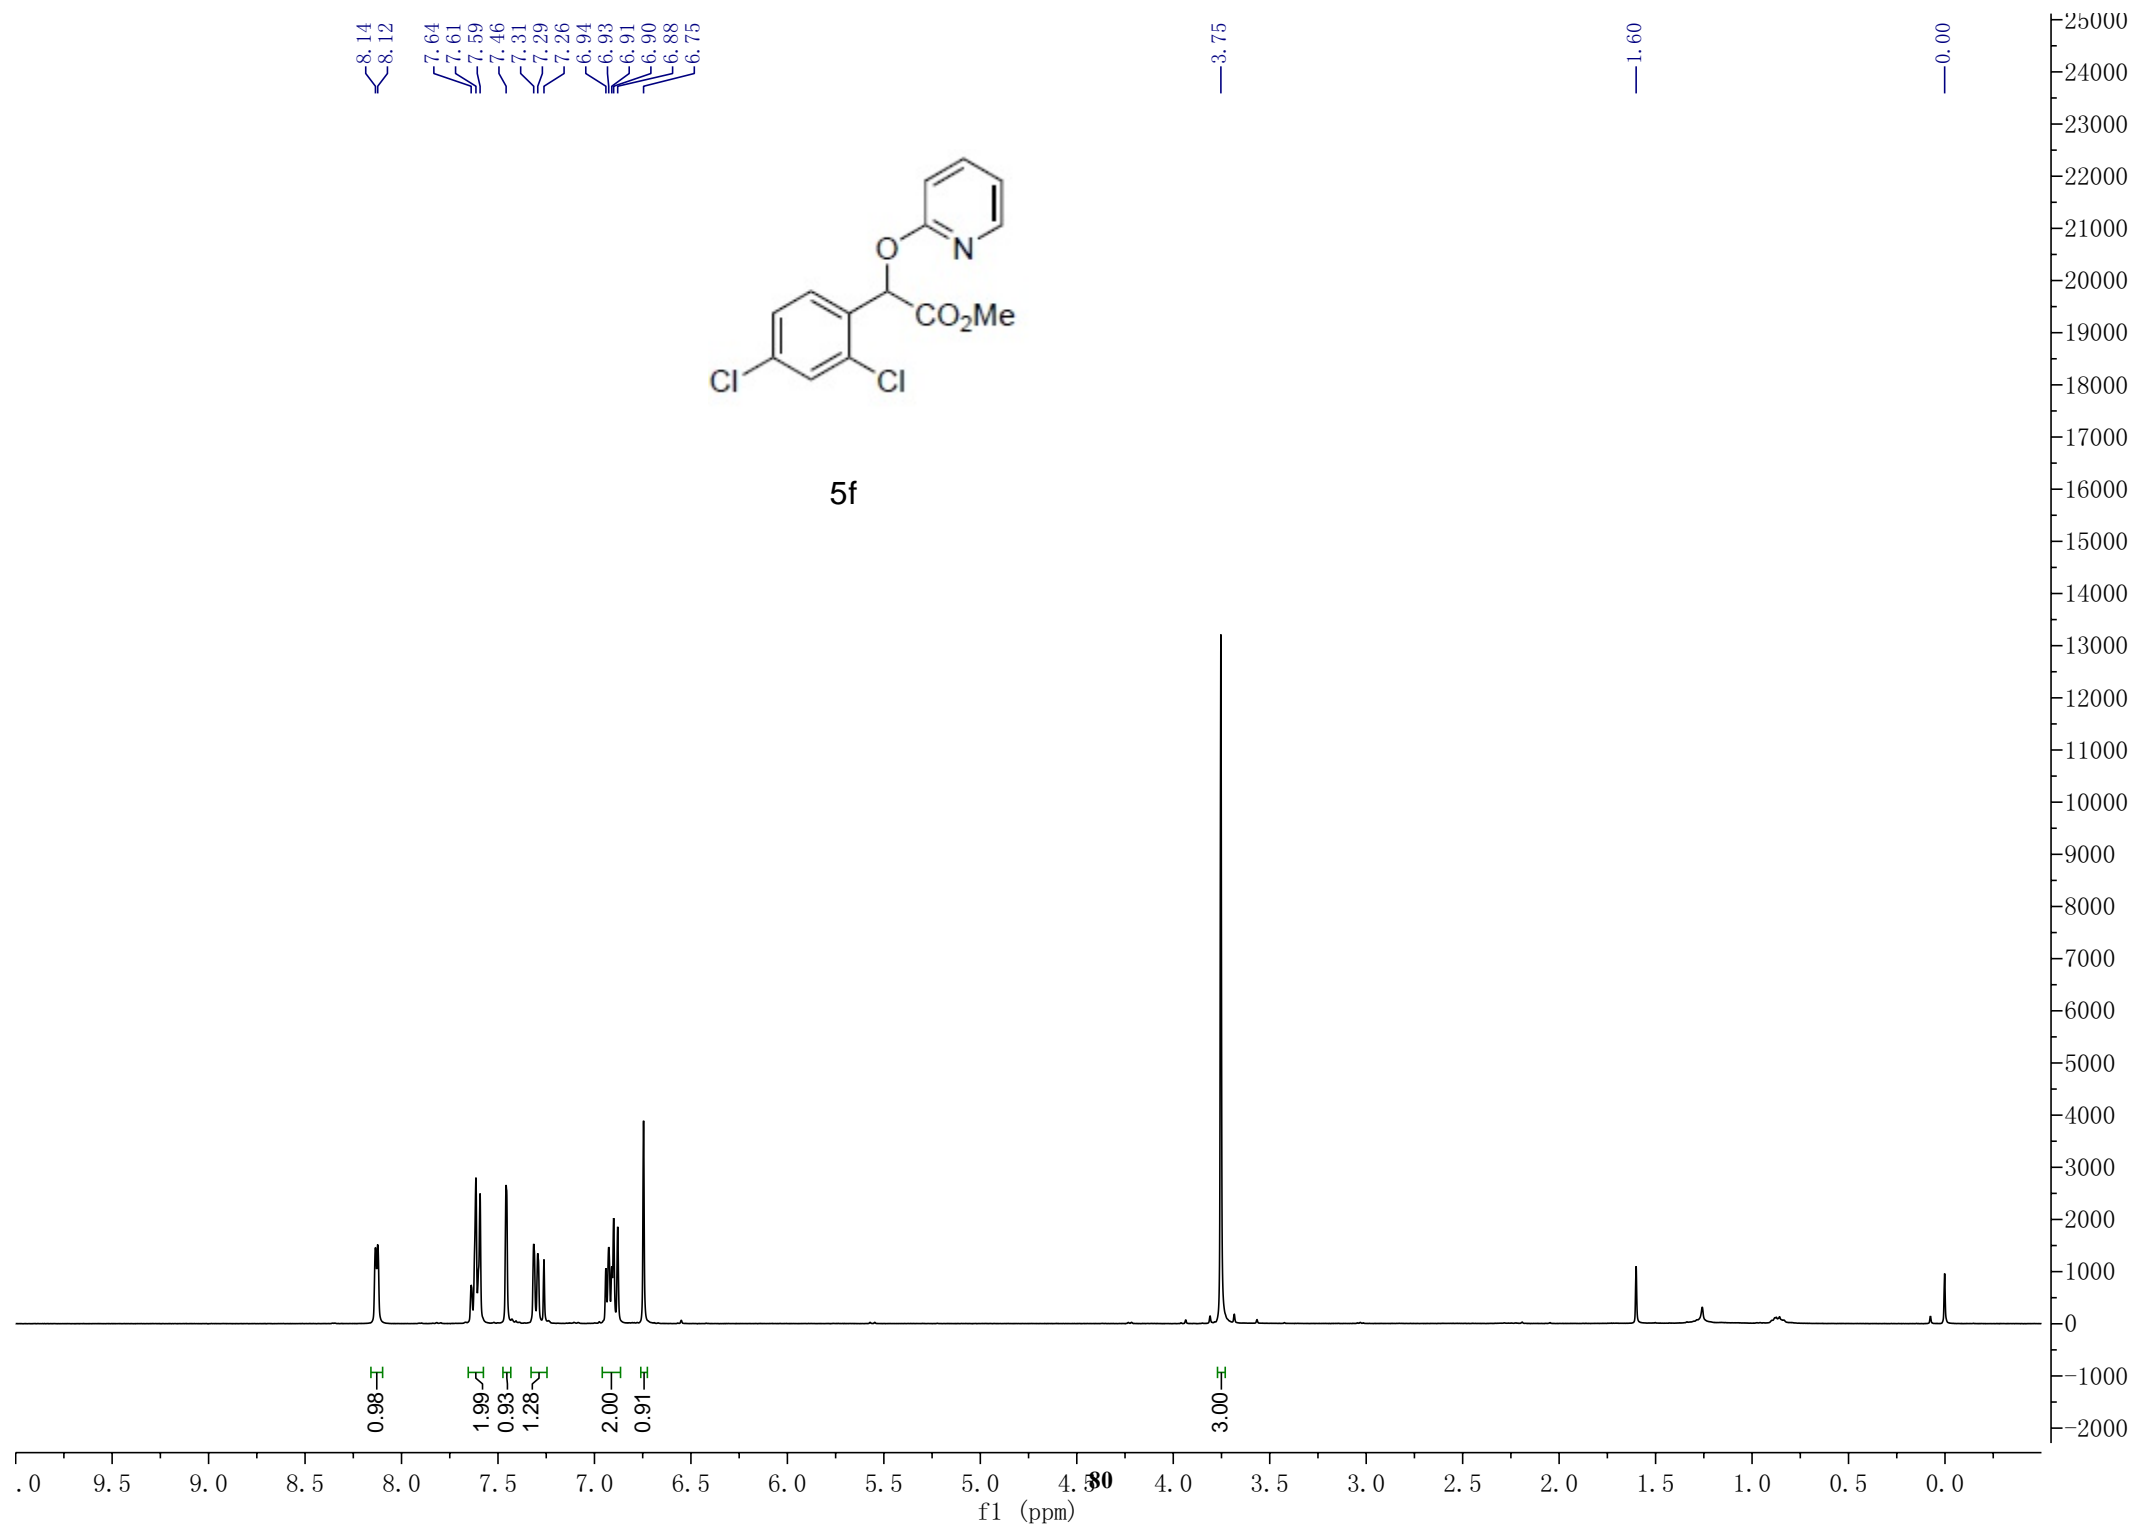

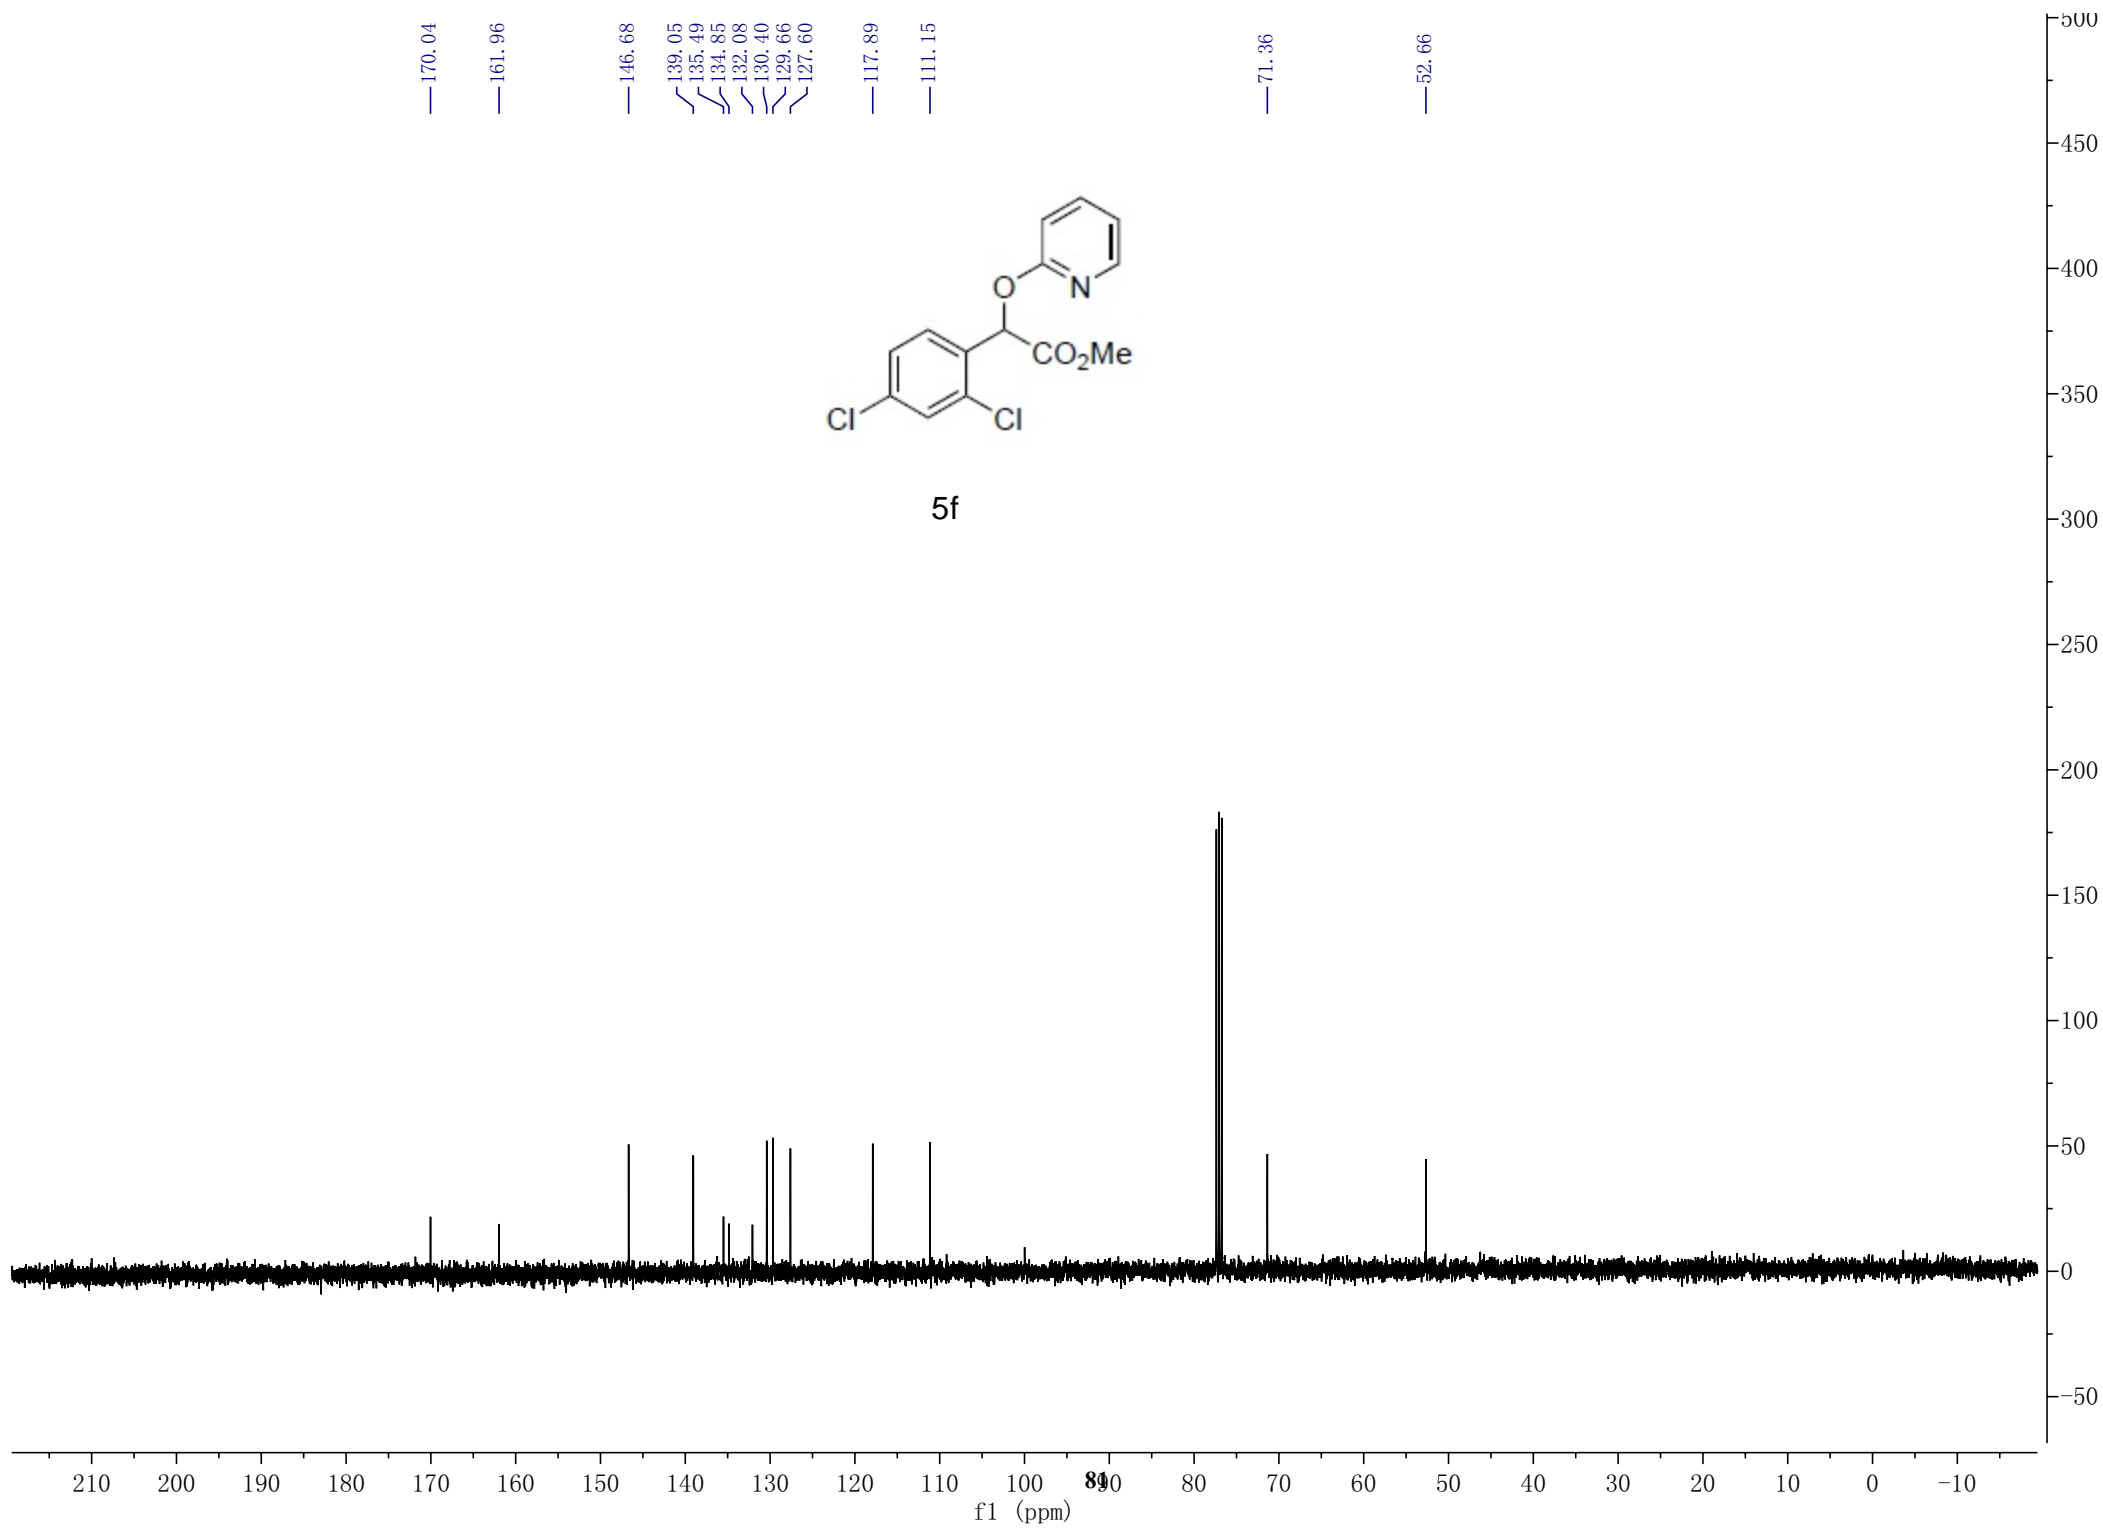

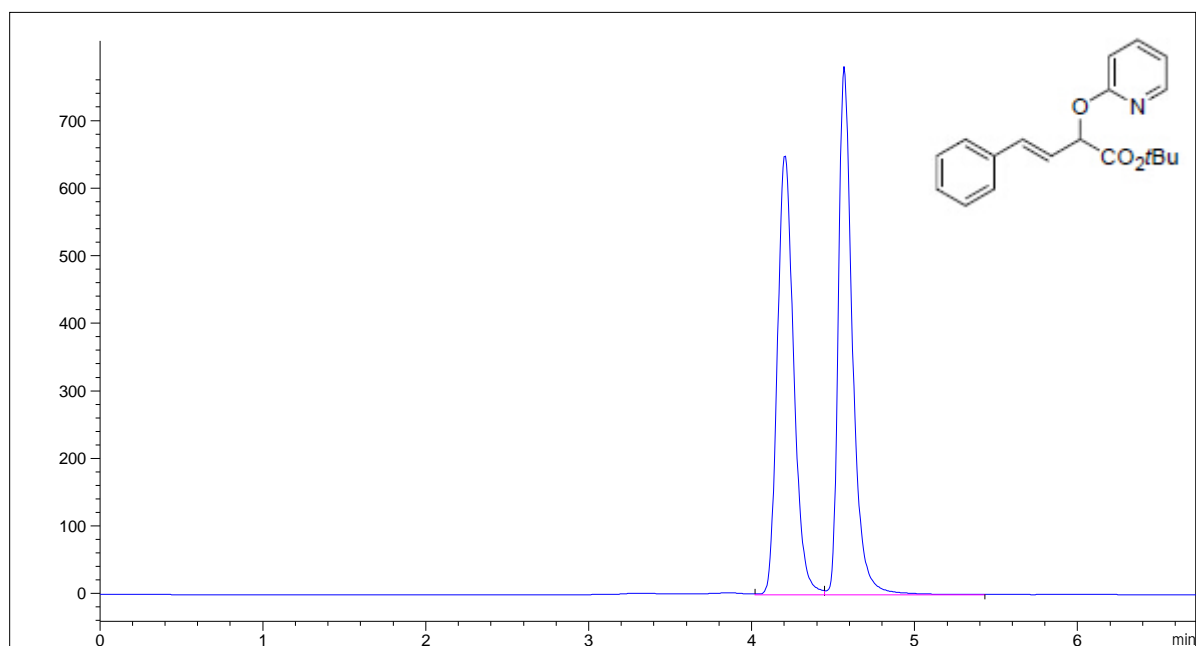

信号 1: DAD1 A, Sig=254, 4 Ref=off

| 峰 # | 保留时间 [min] | 类型 | 峰宽 [min] | 峰面积 [mAU*s] | 峰面积 %   | 名称 |
|-----|------------|----|----------|-------------|---------|----|
| 1   | 4.204      | VV | 0.1097   | 4554.21387  | 49.2453 | ?  |
| 2   | 4.568      | VV | 0.0921   | 4693.80908  | 50.7547 | ?  |

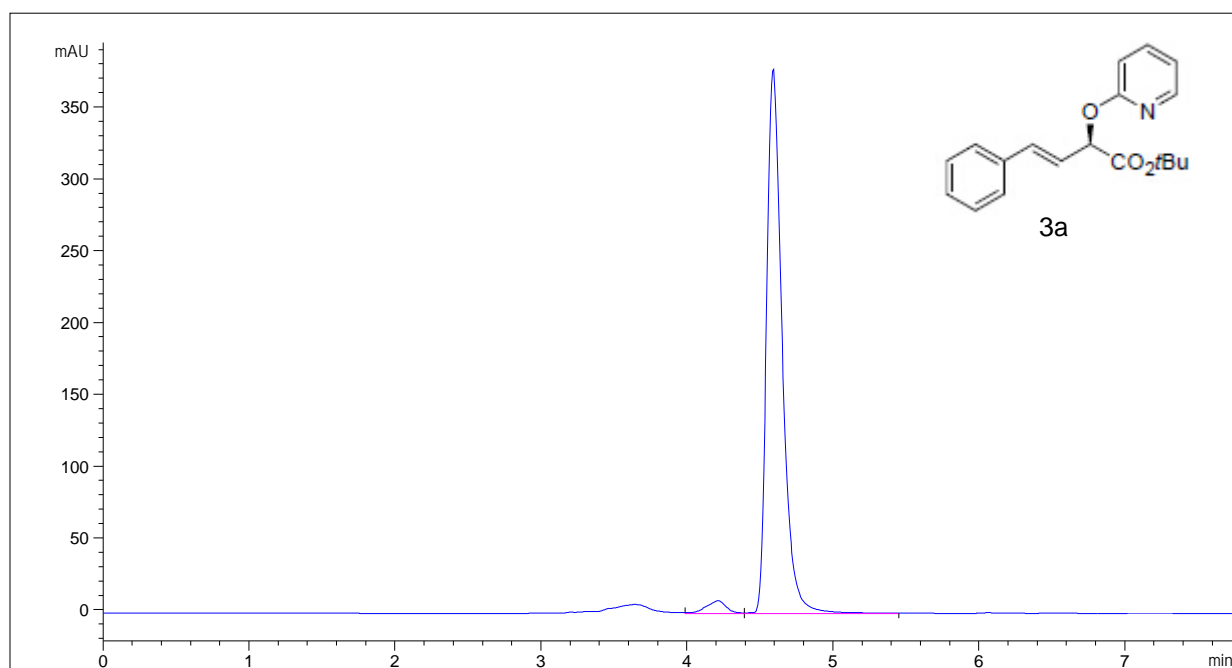

信号 1: DAD1 A, Sig=254, 4 Ref=off

| 峰 # | 保留时间 [min] | 类型 | 峰宽 [min] | 峰面积 [mAU*s] | 峰面积 %   | 名称 |
|-----|------------|----|----------|-------------|---------|----|
| 1   | 4.213      | VV | 0.1390   | 84.16236    | 2.9145  | ?  |
| 2   | 4.592      | VV | 0.1143   | 2803.54639  | 97.0855 | ?  |

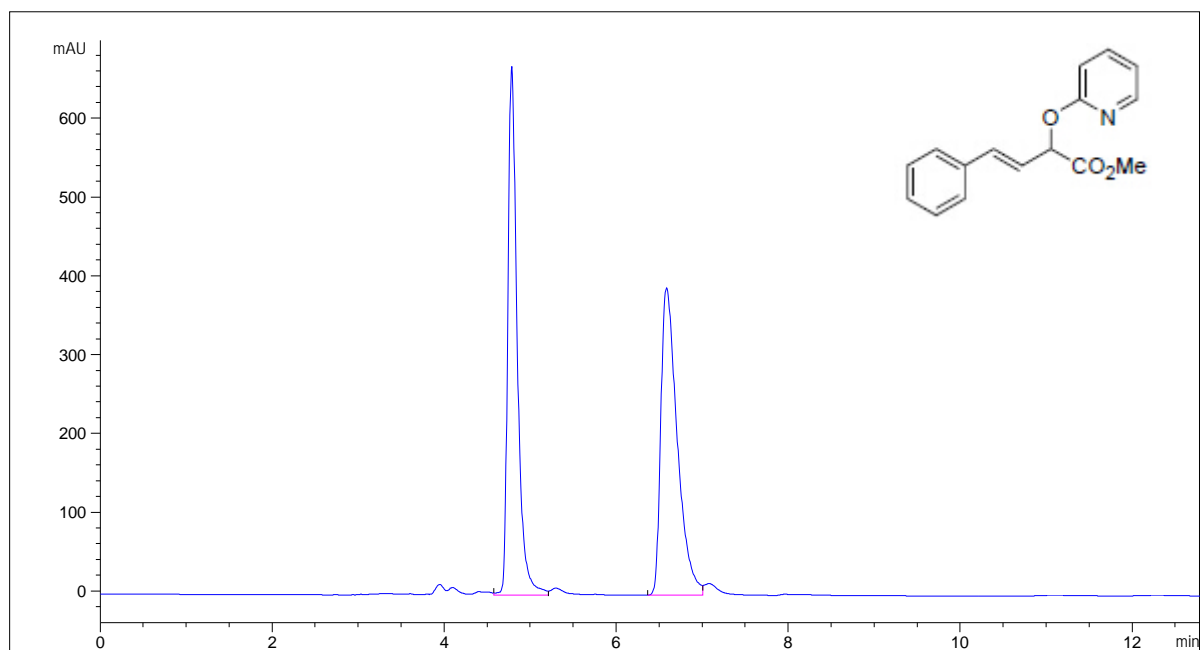

信号 1: DAD1 A, Sig=254,4 Ref=off

| 峰 # | 保留时间 [min] | 类型 | 峰宽 [min] | 峰面积 [mAU*s] | 峰面积 %   | 名称 |
|-----|------------|----|----------|-------------|---------|----|
| 1   | 4.786      | VV | 0.1150   | 5114.83984  | 49.6402 | ?  |
| 2   | 6.587      | BV | 0.2012   | 5188.98291  | 50.3598 | ?  |

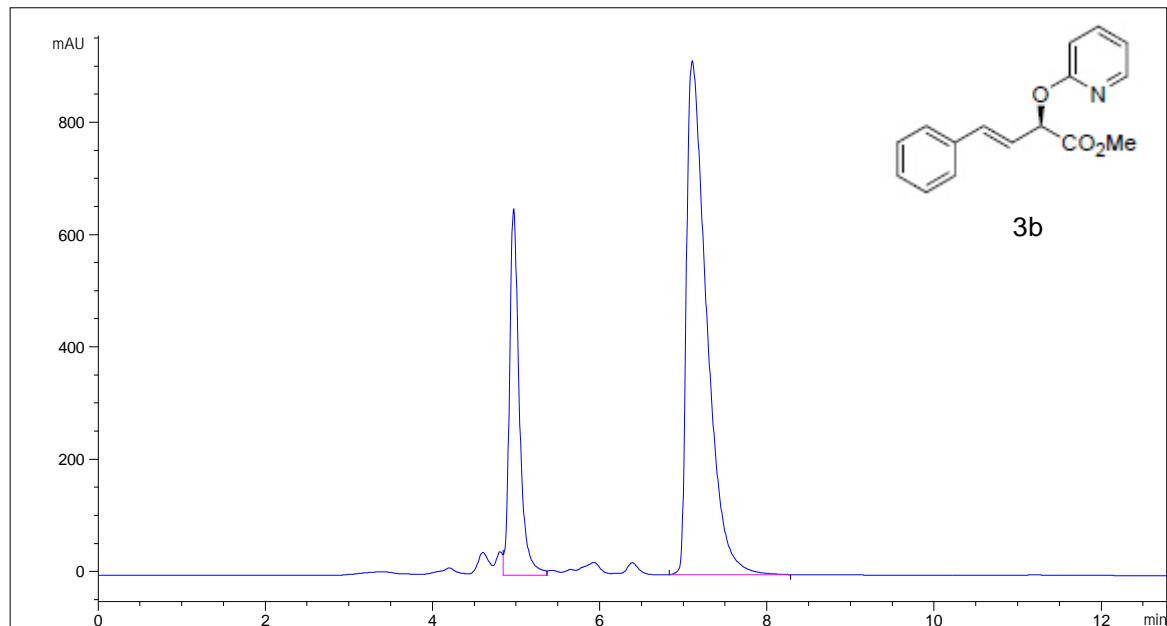

信号 1: DAD1 A, Sig=254,4 Ref=off

| 峰 # | 保留时间 [min] | 类型 | 峰宽 [min] | 峰面积 [mAU*s] | 峰面积 %   | 名称 |
|-----|------------|----|----------|-------------|---------|----|
| 1   | 4.971      | VV | 0.1238   | 5364.01270  | 25.9108 | ?  |
| 2   | 7.108      | BB | 0.2515   | 1.53378e4   | 74.0892 | ?  |

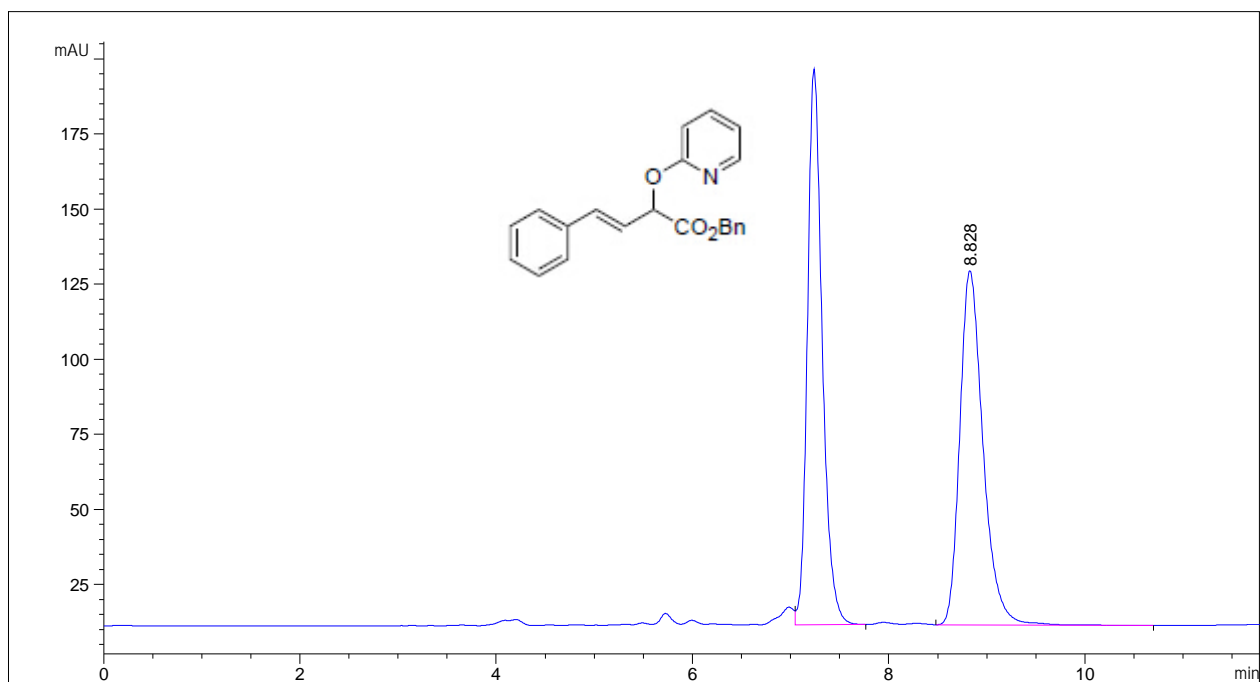

信号 1: DAD1 A, Sig=254,4 Ref=off

| 峰 # | 保留时间 [min] | 类型 | 峰宽 [min] | 峰面积 [mAU*s] | 峰高 [mAU]  | 峰面积 %   |
|-----|------------|----|----------|-------------|-----------|---------|
| 1   | 7.240      | VB | 0.1607   | 1945.29553  | 184.95264 | 50.0923 |
| 2   | 8.828      | VB | 0.2497   | 1938.12756  | 117.95007 | 49.9077 |

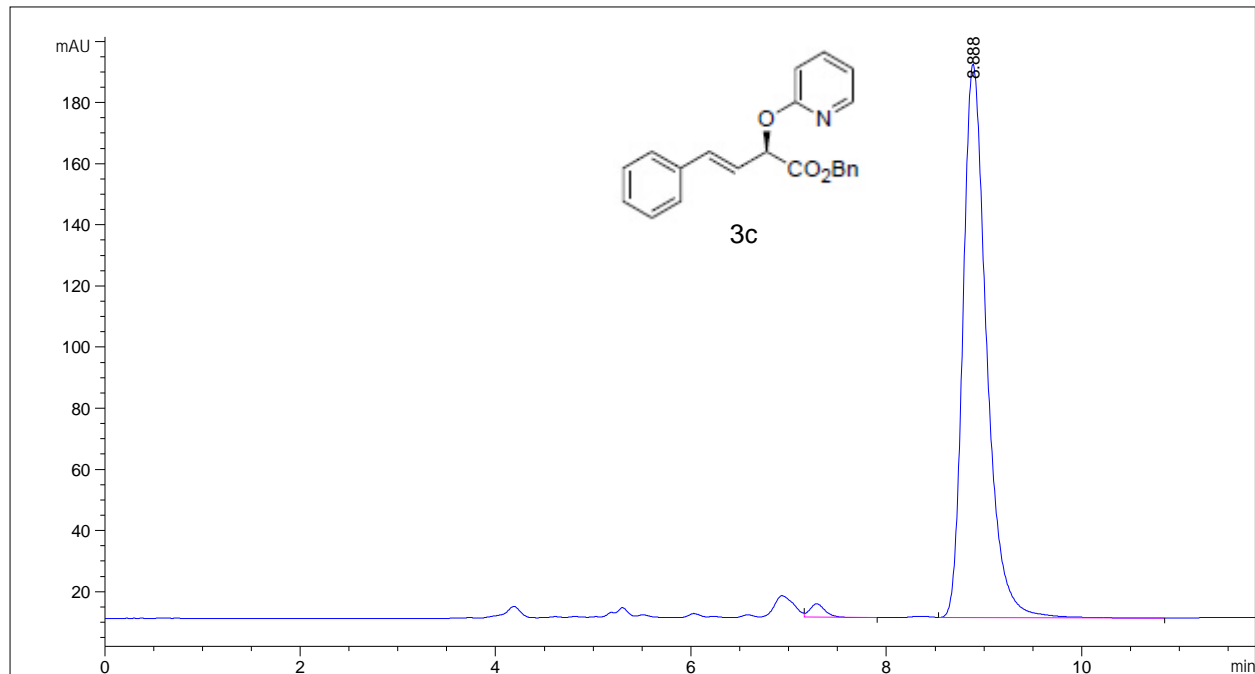

信号 1: DAD1 A, Sig=254,4 Ref=off

| 峰 # | 保留时间 [min] | 类型 | 峰宽 [min] | 峰面积 [mAU*s] | 峰高 [mAU]  | 峰面积 %   |
|-----|------------|----|----------|-------------|-----------|---------|
| 1   | 7.287      | VB | 0.1624   | 48.24669    | 4.45405   | 1.5660  |
| 2   | 8.888      | VB | 0.2534   | 3032.69482  | 181.03250 | 98.4340 |

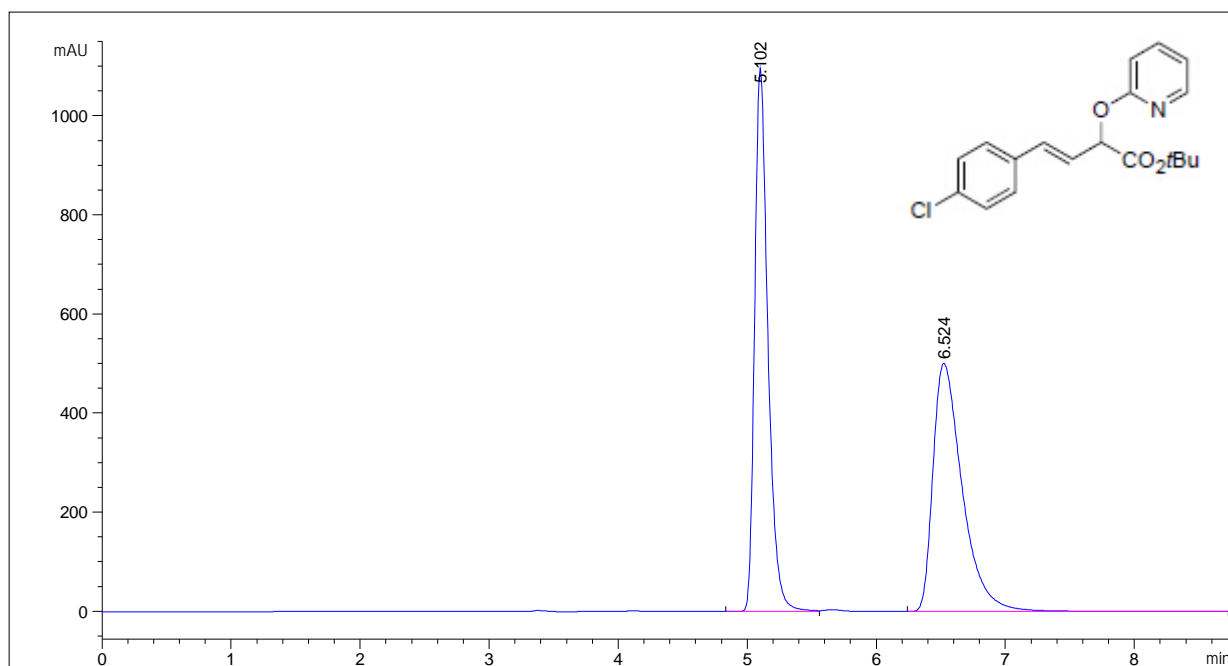

信号 1: DAD1 A, Sig=254, 4 Ref=off

| 峰 # | 保留时间 [min] | 类型  | 峰宽 [min] | 峰面积 [mAU*s] | 峰高 [mAU]   | 峰面积 %   |
|-----|------------|-----|----------|-------------|------------|---------|
| 1   | 5.102      | BV  | 0.1094   | 7845.29736  | 1097.05273 | 49.7765 |
| 2   | 6.524      | BBA | 0.2383   | 7915.75732  | 500.96686  | 50.2235 |

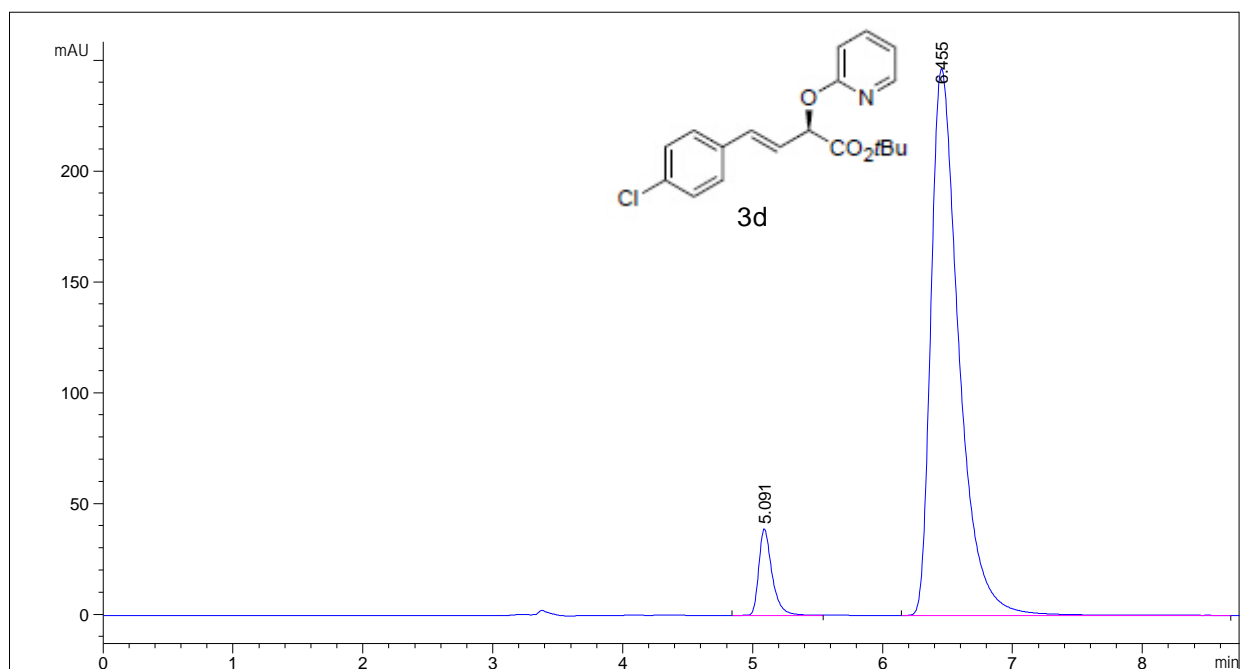

信号 1: DAD1 A, Sig=254, 4 Ref=off

| 峰 # | 保留时间 [min] | 类型  | 峰宽 [min] | 峰面积 [mAU*s] | 峰高 [mAU]  | 峰面积 %   |
|-----|------------|-----|----------|-------------|-----------|---------|
| 1   | 5.091      | BV  | 0.1075   | 279.24249   | 39.03054  | 7.0437  |
| 2   | 6.455      | BBA | 0.2263   | 3685.21143  | 246.61336 | 92.9563 |

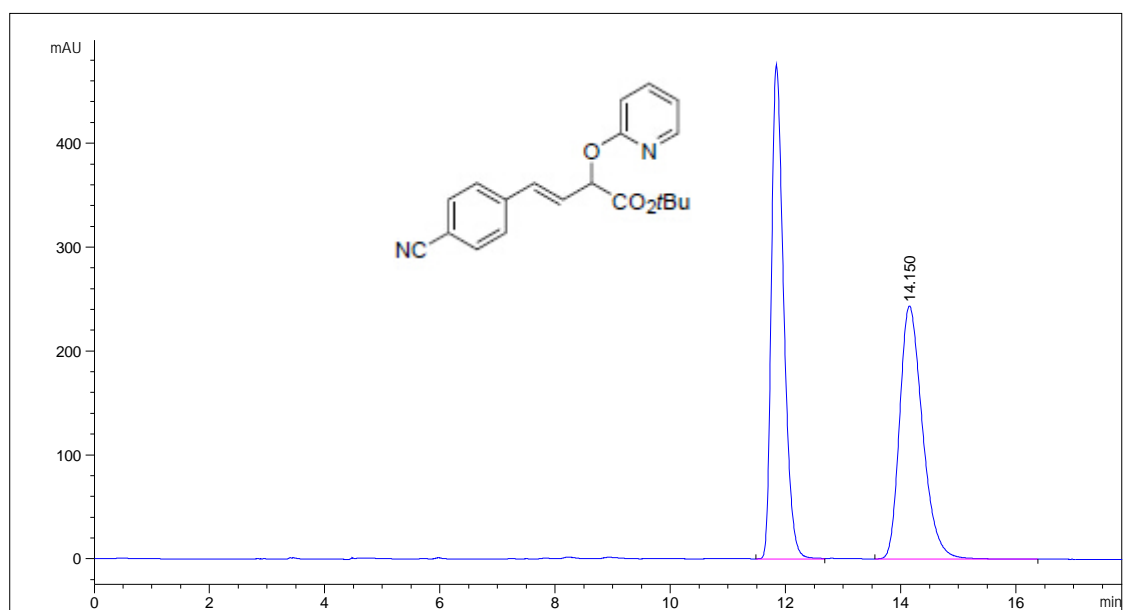

信号 1: DAD1 A, Sig=254,4 Ref=off

| 峰 # | 保留时间 [min] | 类型 | 峰宽 [min] | 峰面积 [mAU*s] | 峰高 [mAU]  | 峰面积 %   |
|-----|------------|----|----------|-------------|-----------|---------|
| 1   | 11.841     | VV | 0.2274   | 7072.94971  | 475.94724 | 51.3371 |
| 2   | 14.150     | VB | 0.4230   | 6704.50586  | 243.70515 | 48.6629 |

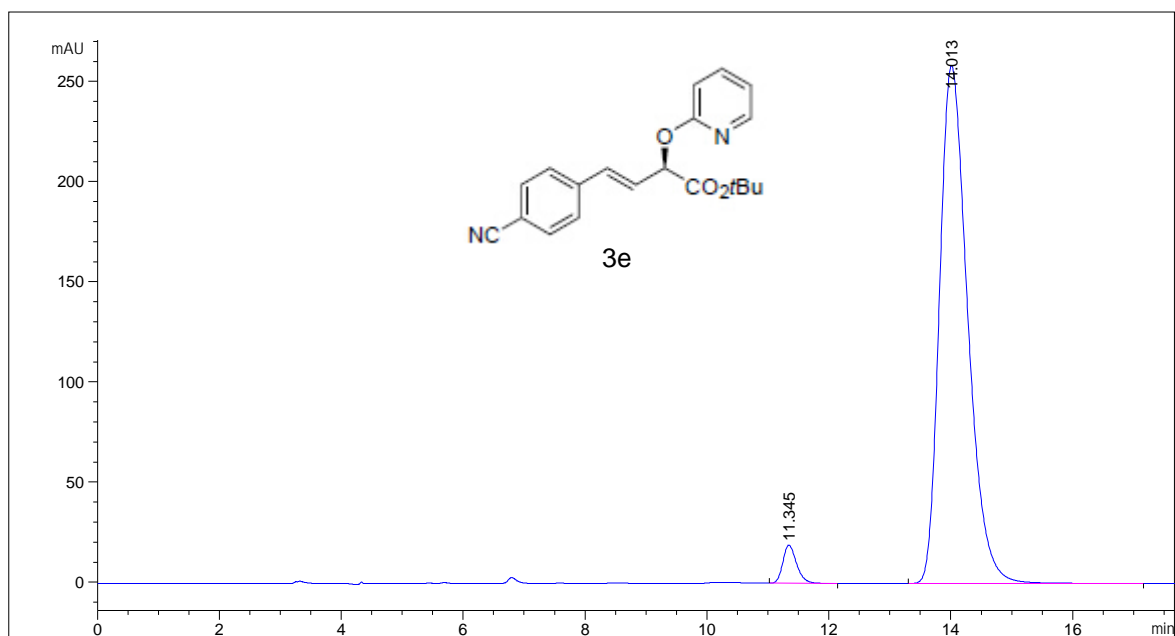

信号 1: DAD1 A, Sig=254,4 Ref=off

| 峰 # | 保留时间 [min] | 类型 | 峰宽 [min] | 峰面积 [mAU*s] | 峰高 [mAU]  | 峰面积 %   |
|-----|------------|----|----------|-------------|-----------|---------|
| 1   | 11.345     | BB | 0.2375   | 295.37354   | 18.98594  | 3.4520  |
| 2   | 14.013     | BB | 0.4929   | 8261.12207  | 258.49054 | 96.5480 |

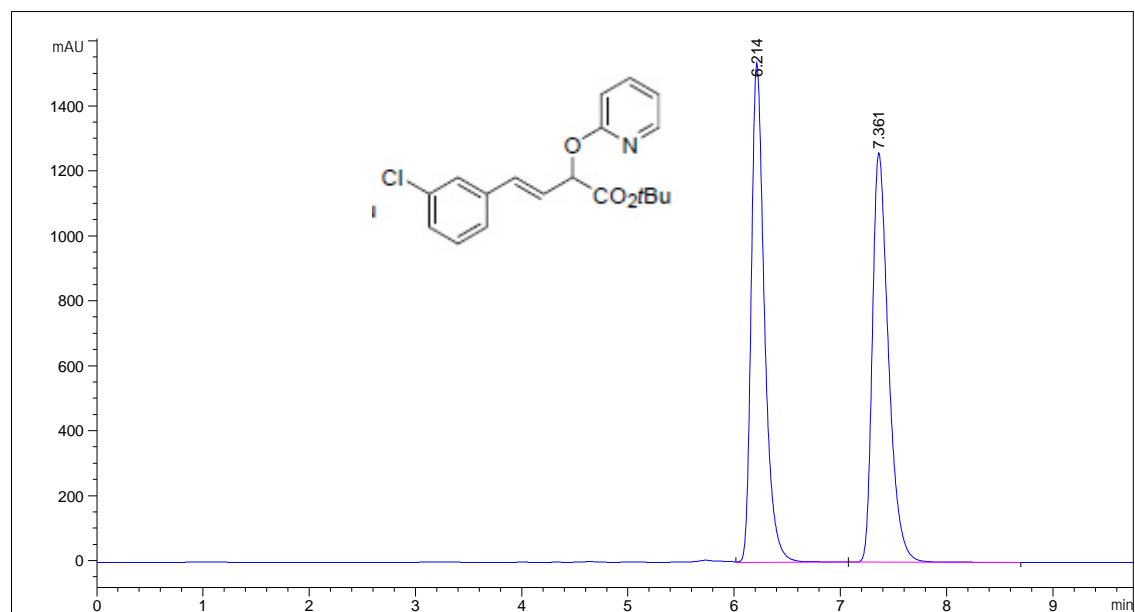

信号 1: DAD1 A, Sig=254, 4 Ref=off

| 峰 # | 保留时间 [min] | 类型 | 峰宽 [min] | 峰面积 [mAU*s] | 峰高 [mAU]   | 峰面积 %   |
|-----|------------|----|----------|-------------|------------|---------|
| 1   | 6.214      | VB | 0.1307   | 1.32551e4   | 1536.41089 | 50.0087 |
| 2   | 7.361      | BB | 0.1586   | 1.32505e4   | 1261.14319 | 49.9913 |

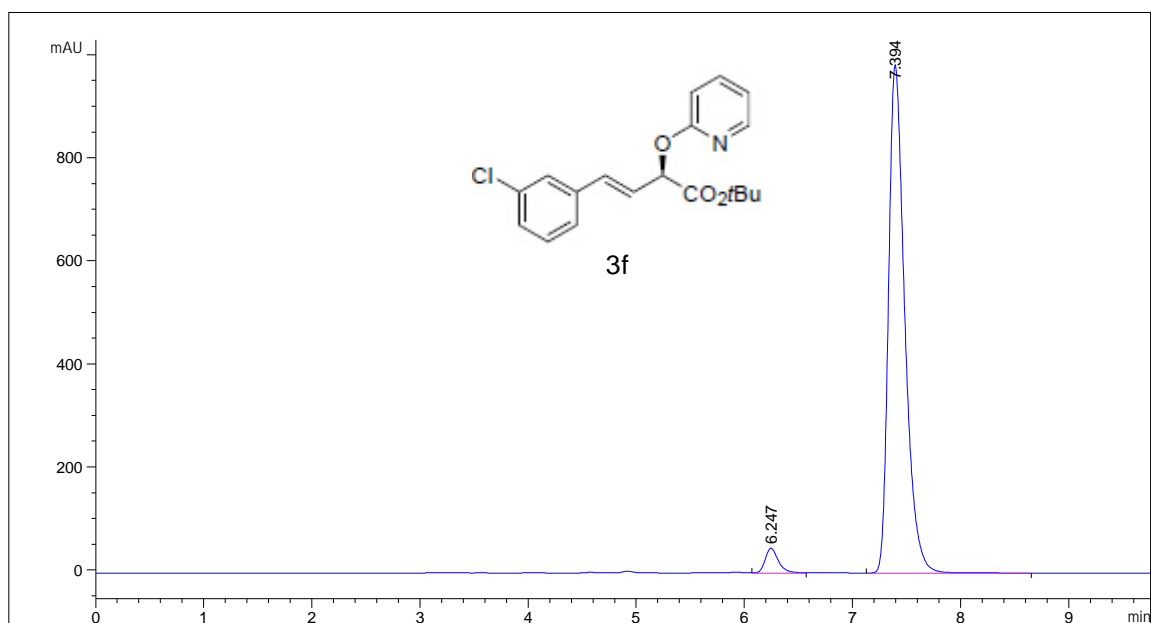

信号 1: DAD1 A, Sig=254, 4 Ref=off

| 峰 # | 保留时间 [min] | 类型 | 峰宽 [min] | 峰面积 [mAU*s] | 峰高 [mAU]  | 峰面积 %   |
|-----|------------|----|----------|-------------|-----------|---------|
| 1   | 6.247      | VV | 0.1286   | 408.14822   | 48.27512  | 3.8284  |
| 2   | 7.394      | BB | 0.1573   | 1.02530e4   | 986.06055 | 96.1716 |

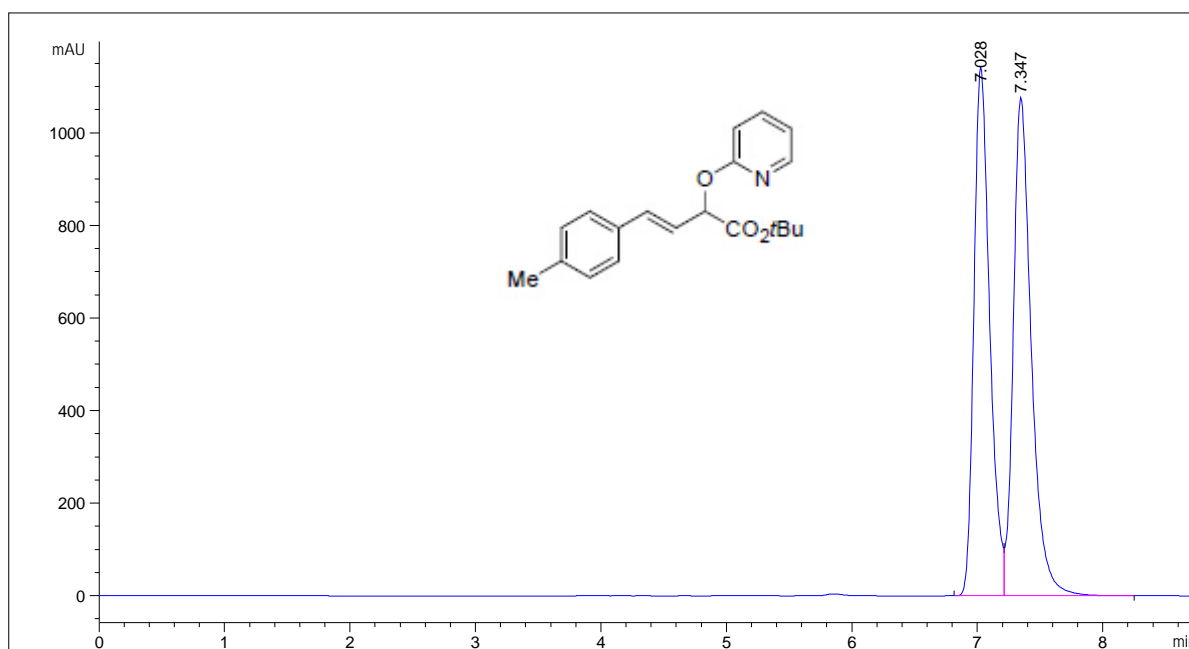

信号 1: DAD1 A, Sig=254,4 Ref=off

| 峰 # | 保留时间 [min] | 类型 | 峰宽 [min] | 峰面积 [mAU*s] | 峰高 [mAU]   | 峰面积 %   |
|-----|------------|----|----------|-------------|------------|---------|
| 1   | 7.028      | BV | 0.1341   | 9993.36230  | 1141.35754 | 48.1298 |
| 2   | 7.347      | VB | 0.1507   | 1.07700e4   | 1076.33447 | 51.8702 |

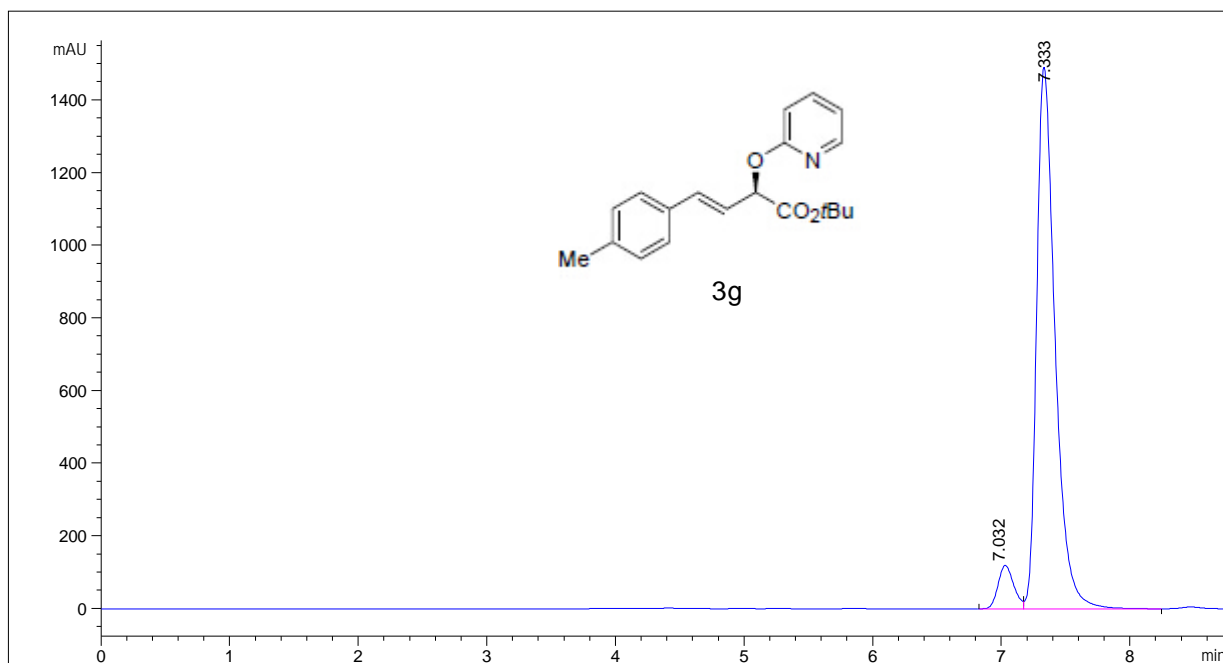

信号 1: DAD1 A, Sig=254,4 Ref=off

| 峰 # | 保留时间 [min] | 类型 | 峰宽 [min] | 峰面积 [mAU*s] | 峰高 [mAU]   | 峰面积 %   |
|-----|------------|----|----------|-------------|------------|---------|
| 1   | 7.032      | BV | 0.1307   | 1013.22223  | 119.74002  | 6.3963  |
| 2   | 7.333      | VB | 0.1500   | 1.48274e4   | 1490.65601 | 93.6037 |

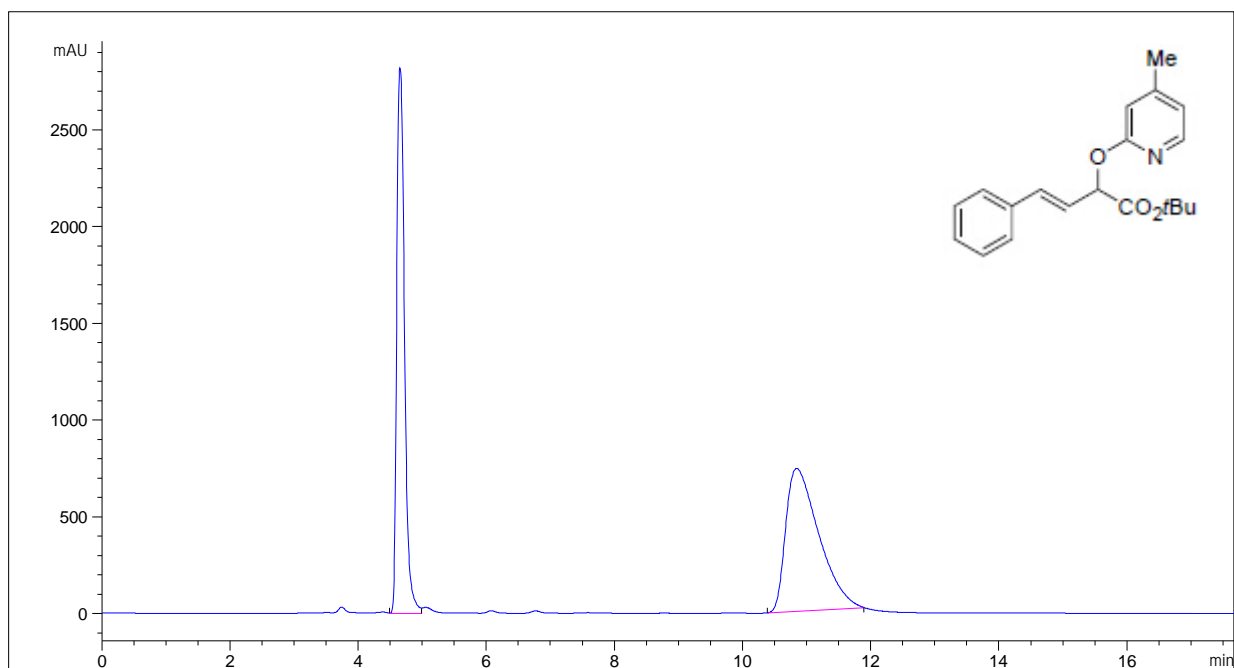

信号 1: DAD1 A, Sig=254,4 Ref=off

| 峰 # | 保留时间 [min] | 类型 | 峰宽 [min] | 峰面积 [mAU*s] | 峰面积 %   | 名称 |
|-----|------------|----|----------|-------------|---------|----|
| 1   | 4.656      | VV | 0.1347   | 2.38079e4   | 47.3194 | ?  |
| 2   | 10.846     | MM | 0.5981   | 2.65053e4   | 52.6806 | ?  |

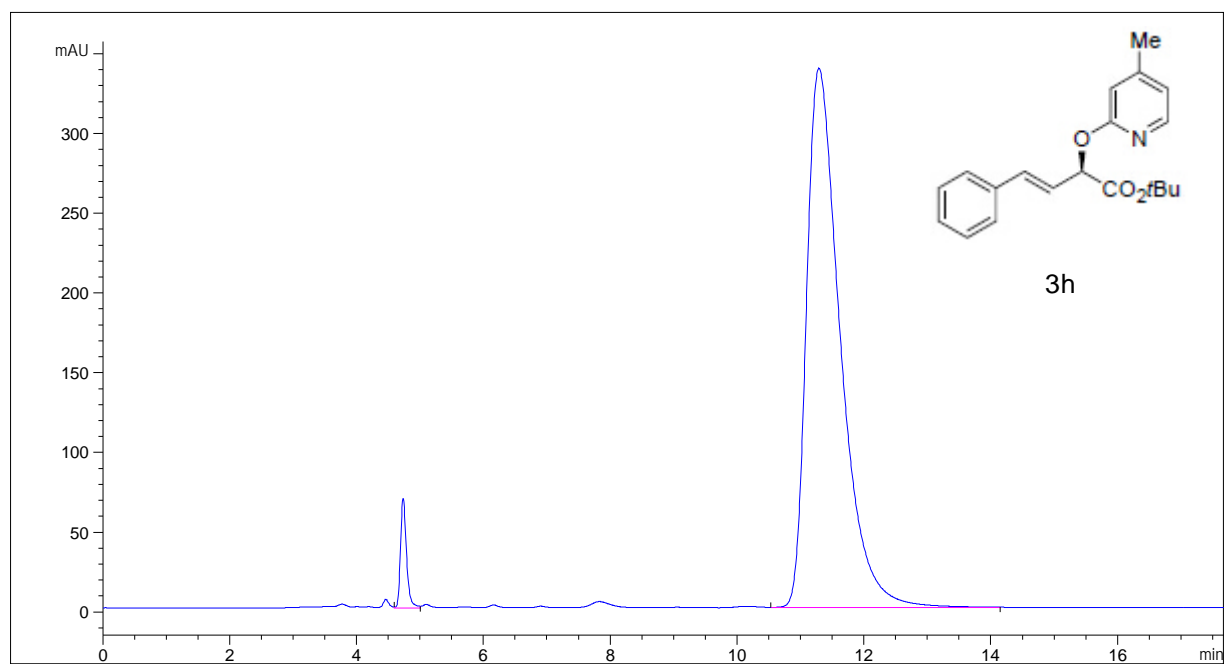

信号 1: DAD1 A, Sig=254,4 Ref=off

| 峰 # | 保留时间 [min] | 类型 | 峰宽 [min] | 峰面积 [mAU*s] | 峰面积 %   | 名称 |
|-----|------------|----|----------|-------------|---------|----|
| 1   | 4.737      | VV | 0.1009   | 451.28976   | 3.4792  | ?  |
| 2   | 11.293     | VB | 0.5639   | 1.25197e4   | 96.5208 | ?  |

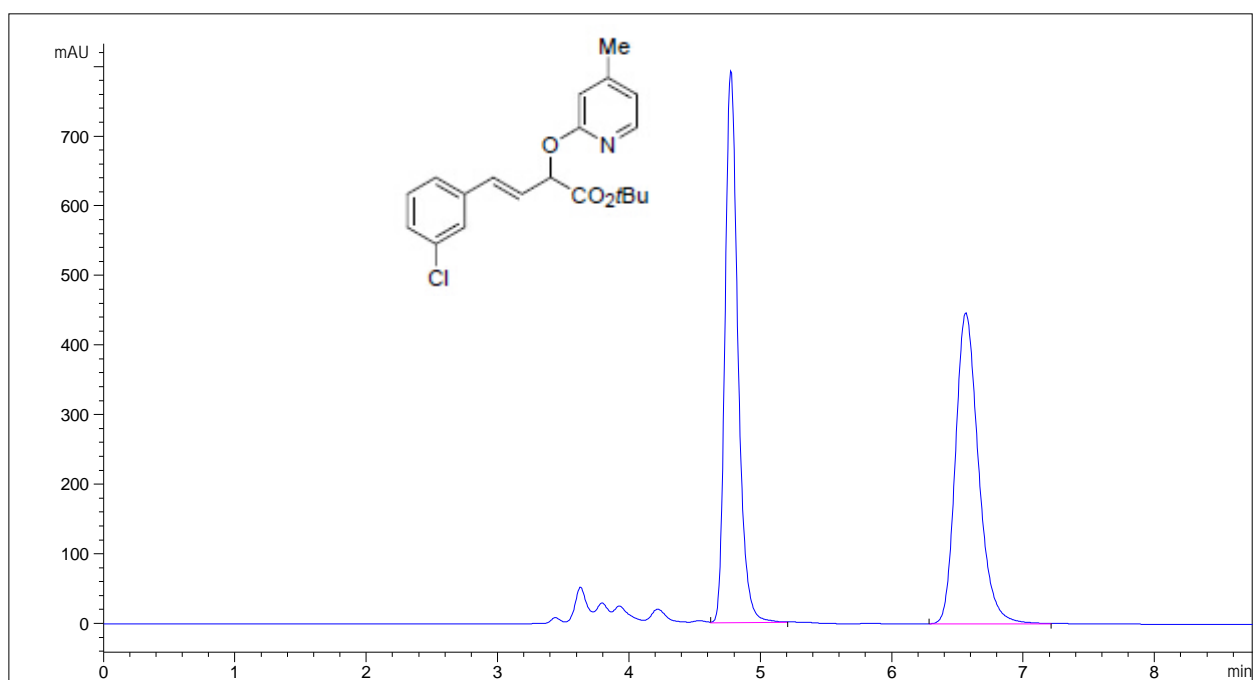

信号 1: DAD1 A, Sig=254,4 Ref=off

| 峰 # | 保留时间 [min] | 类型 | 峰宽 [min] | 峰面积 [mAU*s] | 峰面积 %   | 名称 |
|-----|------------|----|----------|-------------|---------|----|
| 1   | 4.776      | VB | 0.1032   | 5386.93701  | 49.7907 | ?  |
| 2   | 6.564      | BB | 0.1859   | 5432.23340  | 50.2093 | ?  |

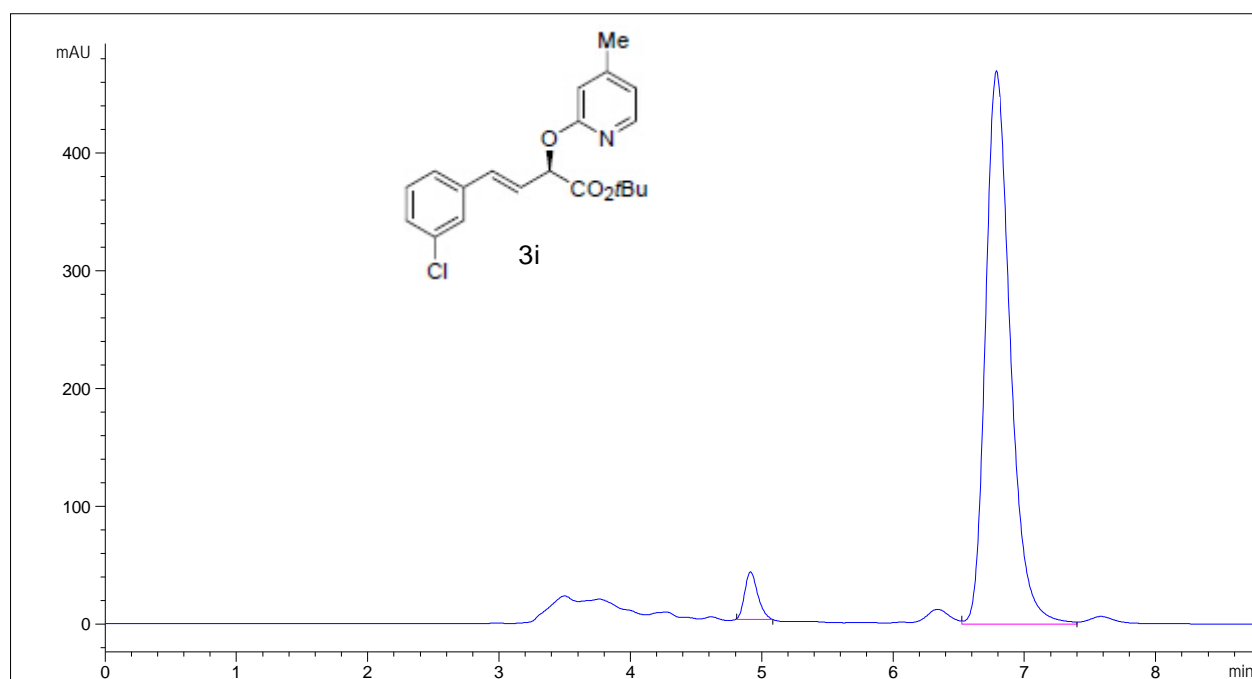

信号 1: DAD1 A, Sig=254,4 Ref=off

| 峰 # | 保留时间 [min] | 类型 | 峰宽 [min] | 峰面积 [mAU*s] | 峰面积 %   | 名称 |
|-----|------------|----|----------|-------------|---------|----|
| 1   | 4.915      | MM | 0.1150   | 279.83853   | 4.3710  | ?  |
| 2   | 6.788      | VV | 0.2001   | 6122.29346  | 95.6290 | ?  |

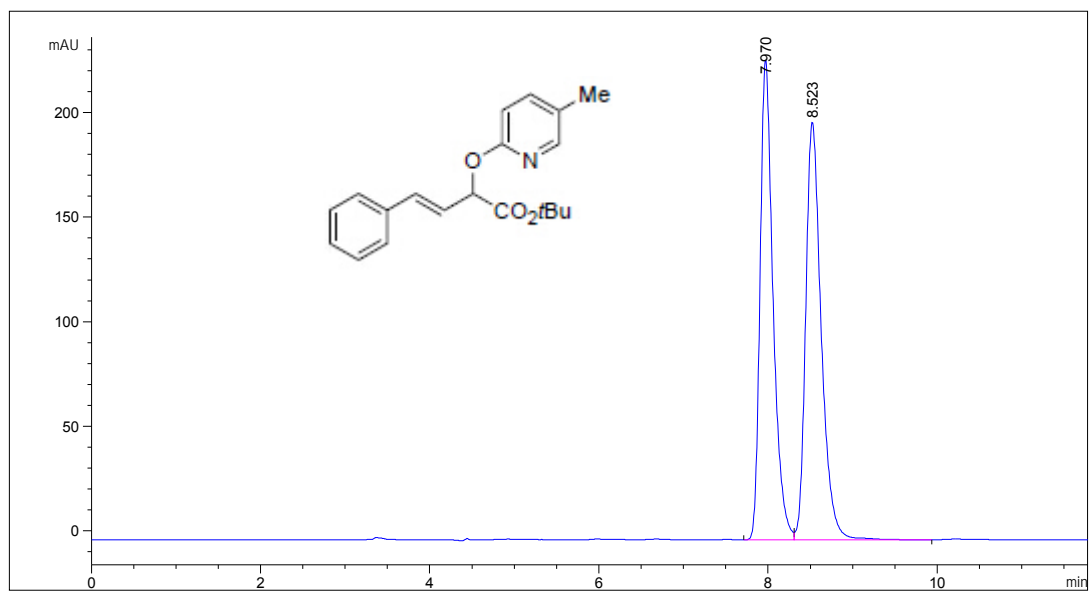

信号 1: DAD1 A, Sig=254, 4 Ref=off

| 峰 # | 保留时间 [min] | 类型 | 峰宽 [min] | 峰面积 [mAU*s] | 峰高 [mAU]  | 峰面积 %   |
|-----|------------|----|----------|-------------|-----------|---------|
| 1   | 7.970      | BV | 0.1605   | 2444.94653  | 229.12538 | 49.0539 |
| 2   | 8.523      | VV | 0.1925   | 2539.25879  | 199.54655 | 50.9461 |

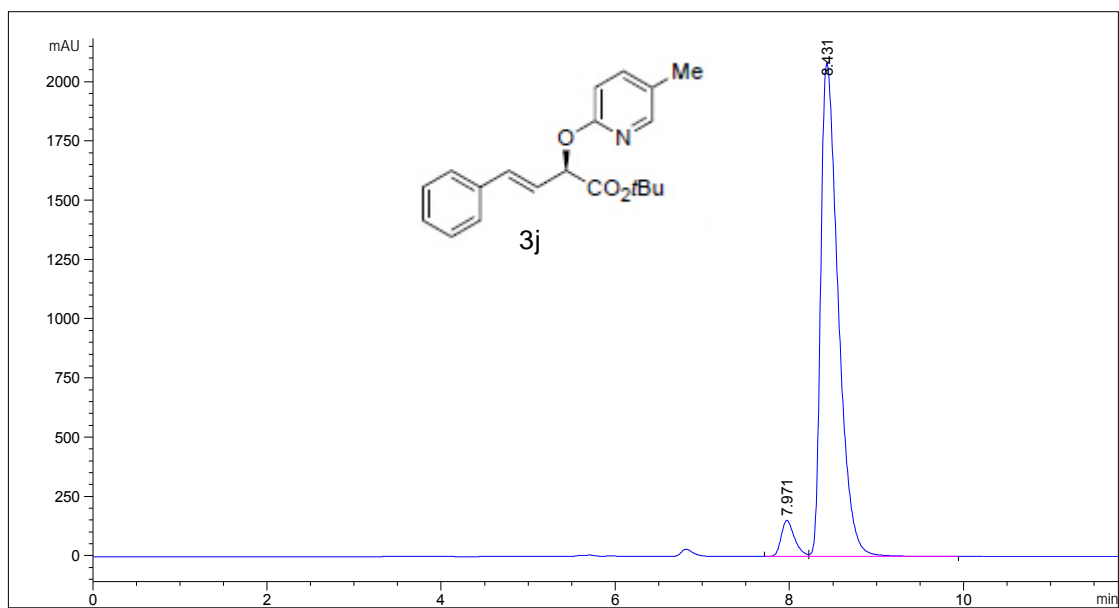

信号 1: DAD1 A, Sig=254, 4 Ref=off

| 峰 # | 保留时间 [min] | 类型 | 峰宽 [min] | 峰面积 [mAU*s] | 峰高 [mAU]   | 峰面积 %   |
|-----|------------|----|----------|-------------|------------|---------|
| 1   | 7.971      | BV | 0.1607   | 1633.17529  | 152.79597  | 5.3282  |
| 2   | 8.431      | VV | 0.2124   | 2.90182e4   | 2084.31592 | 94.6718 |

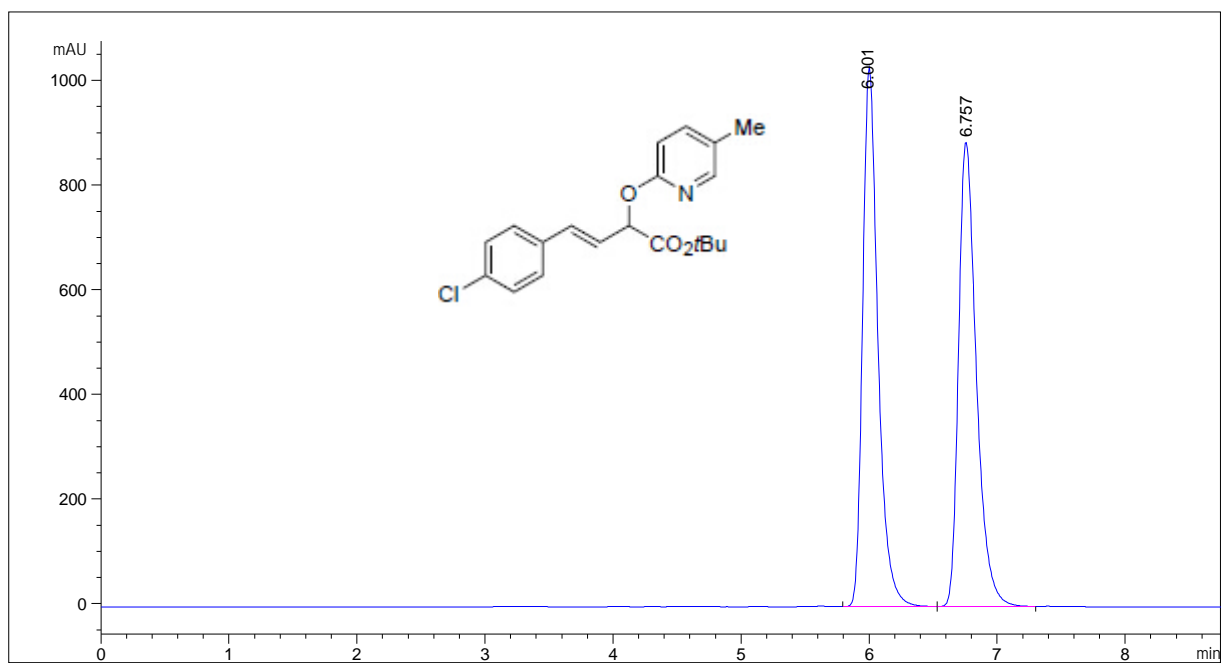

信号 1: DAD1 A, Sig=254,4 Ref=off

| 峰 # | 保留时间 [min] | 类型 | 峰宽 [min] | 峰面积 [mAU*s] | 峰高 [mAU]   | 峰面积 %   |
|-----|------------|----|----------|-------------|------------|---------|
| 1   | 6.001      | BB | 0.1263   | 8508.05566  | 1030.35950 | 49.9660 |
| 2   | 6.757      | BV | 0.1460   | 8519.62988  | 887.48395  | 50.0340 |

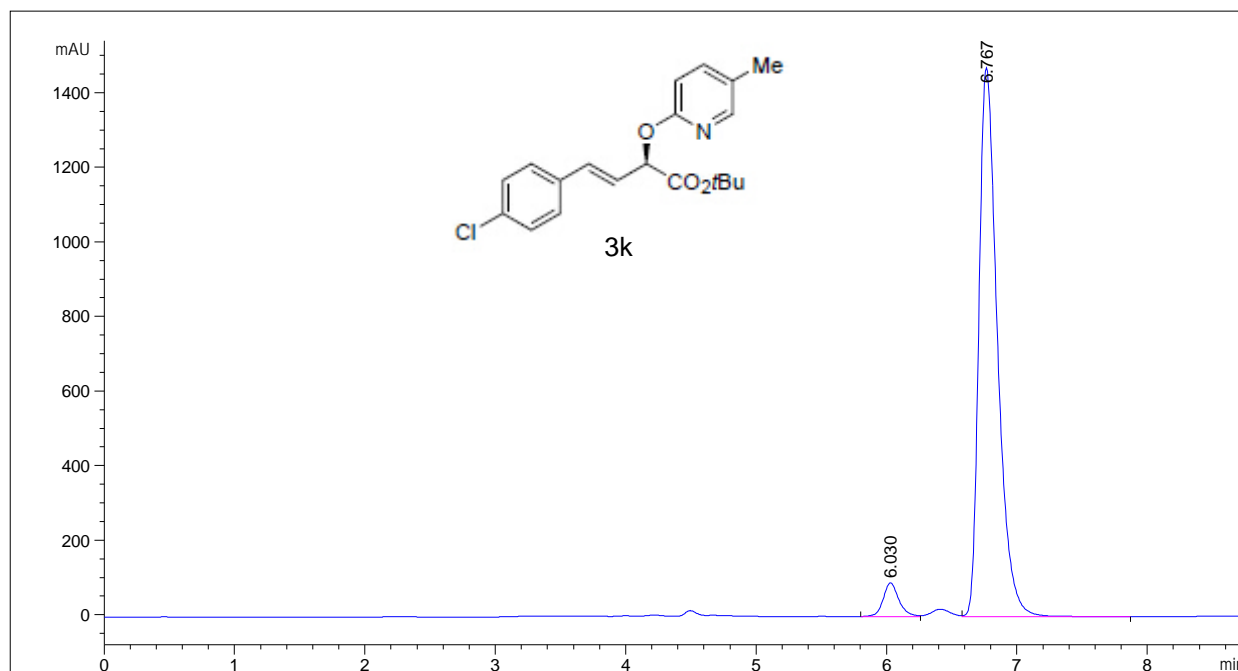

信号 1: DAD1 A, Sig=254,4 Ref=off

| 峰 # | 保留时间 [min] | 类型 | 峰宽 [min] | 峰面积 [mAU*s] | 峰高 [mAU]   | 峰面积 %   |
|-----|------------|----|----------|-------------|------------|---------|
| 1   | 6.030      | BV | 0.1251   | 748.72327   | 89.94305   | 4.9478  |
| 2   | 6.767      | VB | 0.1480   | 1.43837e4   | 1471.47681 | 95.0522 |

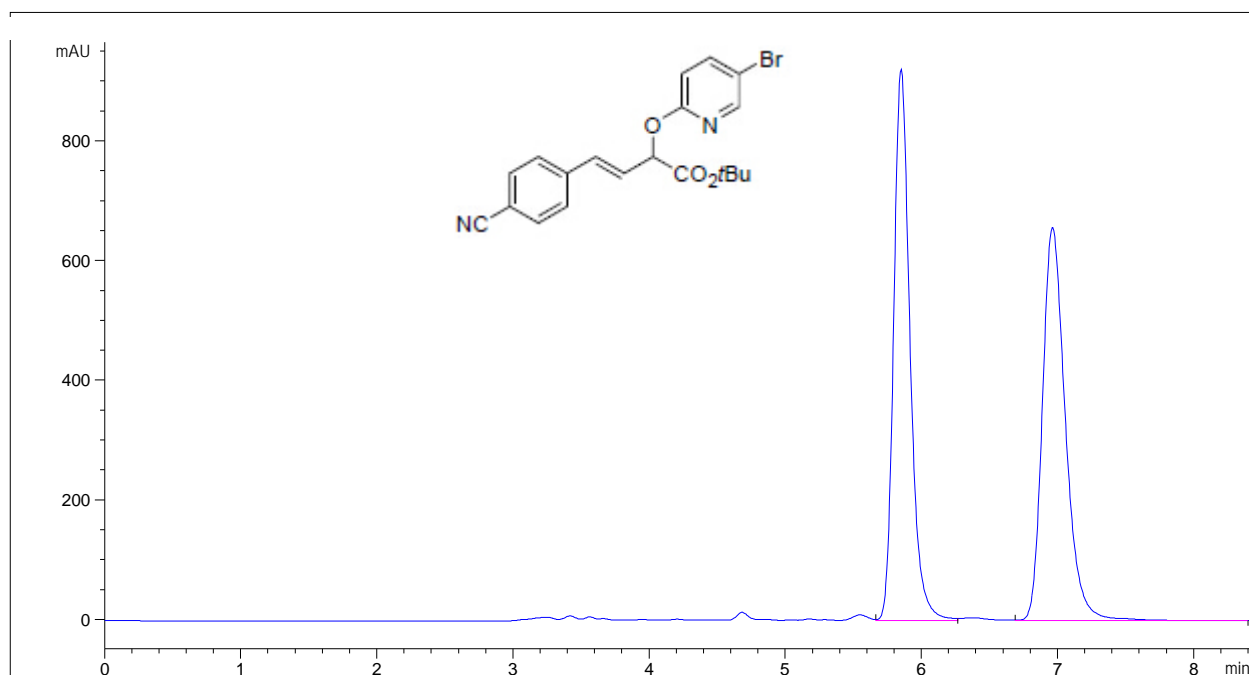

信号 1: DAD1 A, Sig=254,4 Ref=off

| 峰 # | 保留时间 [min] | 类型 | 峰宽 [min] | 峰面积 [mAU*s] | 峰面积 %   | 名称          |
|-----|------------|----|----------|-------------|---------|-------------|
| 1   | 5.852      | VV | 0.1273   | 7691.66895  | 49.9460 | o-Terphenyl |
| 2   | 6.964      | VB | 0.1807   | 7708.30615  | 50.0540 | ?           |

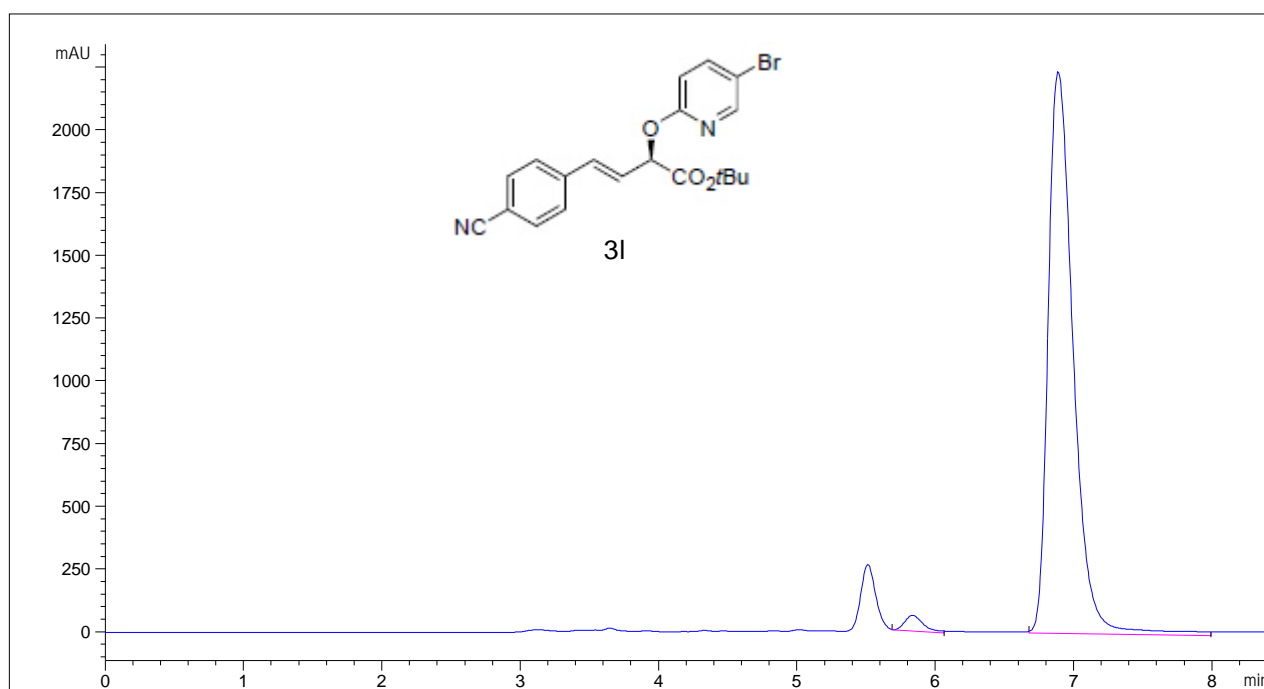

信号 1: DAD1 A, Sig=254,4 Ref=off

| 峰 # | 保留时间 [min] | 类型 | 峰宽 [min] | 峰面积 [mAU*s] | 峰面积 %   | 名称          |
|-----|------------|----|----------|-------------|---------|-------------|
| 1   | 5.840      | MM | 0.1570   | 581.76593   | 2.0159  | o-Terphenyl |
| 2   | 6.889      | MM | 0.2105   | 2.82769e4   | 97.9841 | ?           |

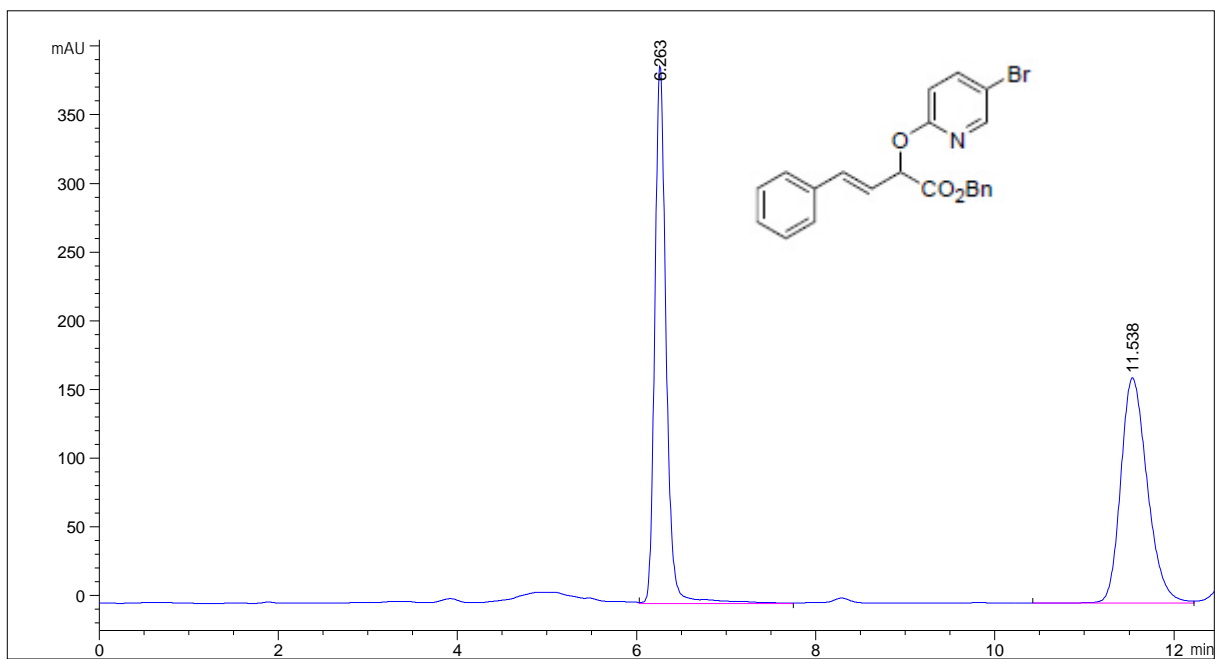

信号 1: DAD1 A, Sig=254,4 Ref=off

| 峰 # | 保留时间 [min] | 类型 | 峰宽 [min] | 峰面积 [mAU*s] | 峰面积 %   | 名称 |
|-----|------------|----|----------|-------------|---------|----|
| 1   | 6.263      | VB | 0.1356   | 3468.80762  | 50.5708 | ?  |
| 2   | 11.538     | VV | 0.3212   | 3390.50659  | 49.4292 | ?  |

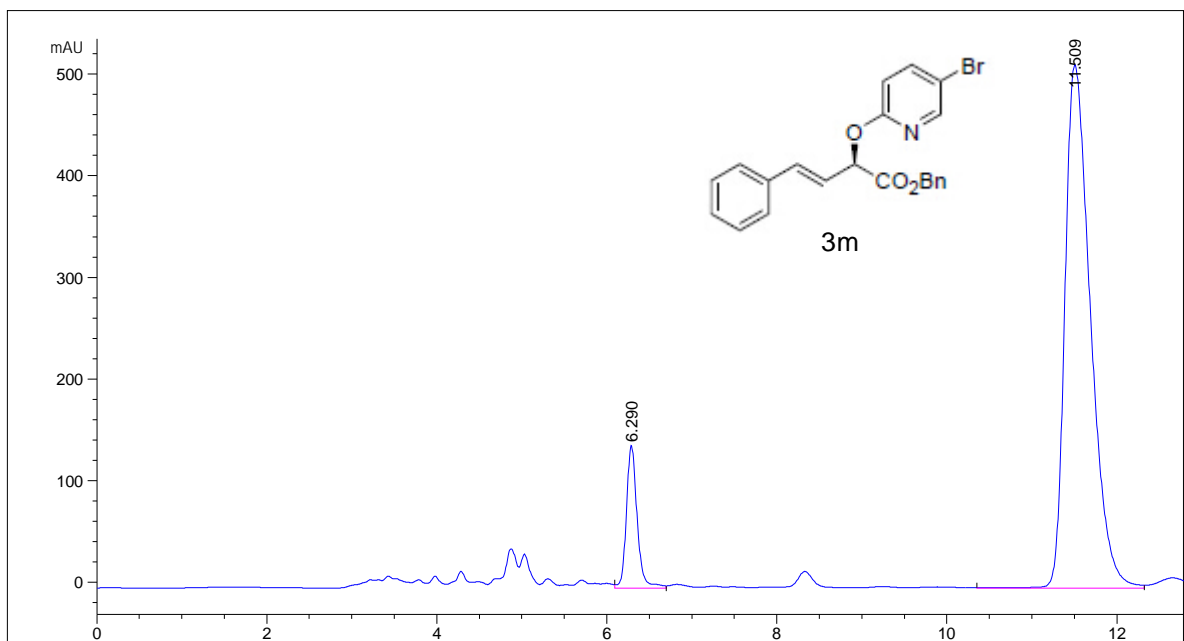

信号 1: DAD1 A, Sig=254,4 Ref=off

| 峰 # | 保留时间 [min] | 类型 | 峰宽 [min] | 峰面积 [mAU*s] | 峰面积 %   | 名称 |
|-----|------------|----|----------|-------------|---------|----|
| 1   | 6.290      | VV | 0.1350   | 1234.60425  | 9.3527  | ?  |
| 2   | 11.509     | VV | 0.3225   | 1.06908e4   | 90.6473 | ?  |

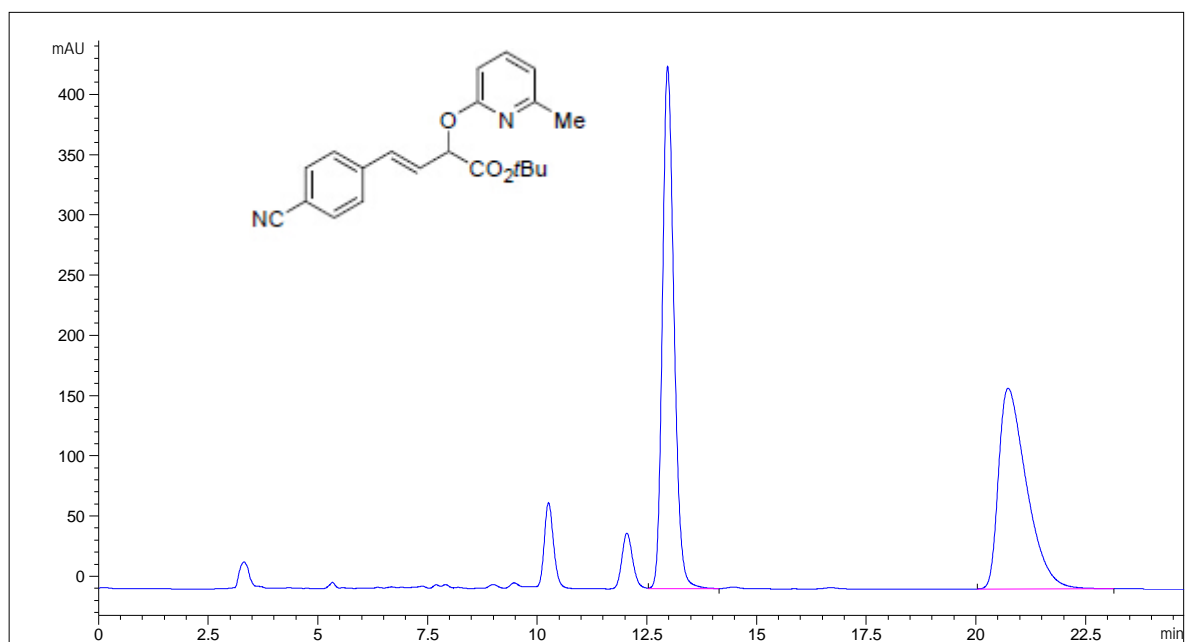

信号 1: DAD1 A, Sig=254,4 Ref=off

| 峰 # | 保留时间 [min] | 类型 | 峰宽 [min] | 峰面积 [mAU*s] | 峰面积 %   | 名称 |
|-----|------------|----|----------|-------------|---------|----|
| 1   | 12.973     | VV | 0.2831   | 7992.72314  | 51.9296 | ?  |
| 2   | 20.736     | BB | 0.6781   | 7398.73975  | 48.0704 | ?  |

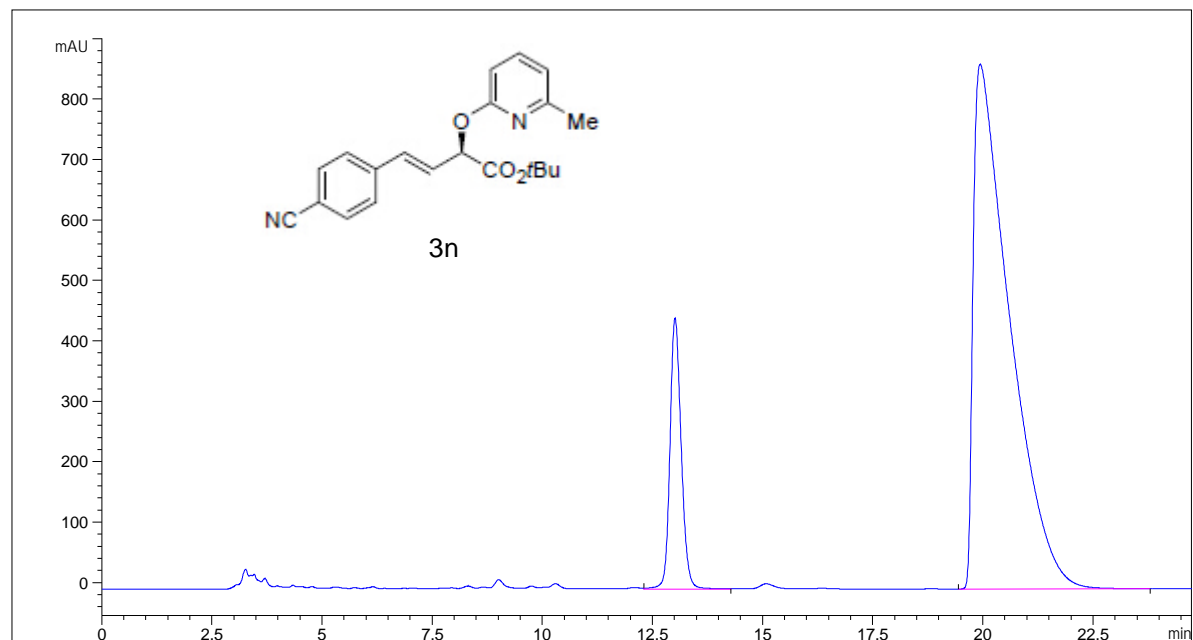

信号 1: DAD1 A, Sig=254,4 Ref=off

| 峰 # | 保留时间 [min] | 类型 | 峰宽 [min] | 峰面积 [mAU*s] | 峰面积 %   | 名称 |
|-----|------------|----|----------|-------------|---------|----|
| 1   | 13.014     | VV | 0.2752   | 7955.31836  | 13.7476 | ?  |
| 2   | 19.944     | BB | 0.8230   | 4.99116e4   | 86.2524 | ?  |

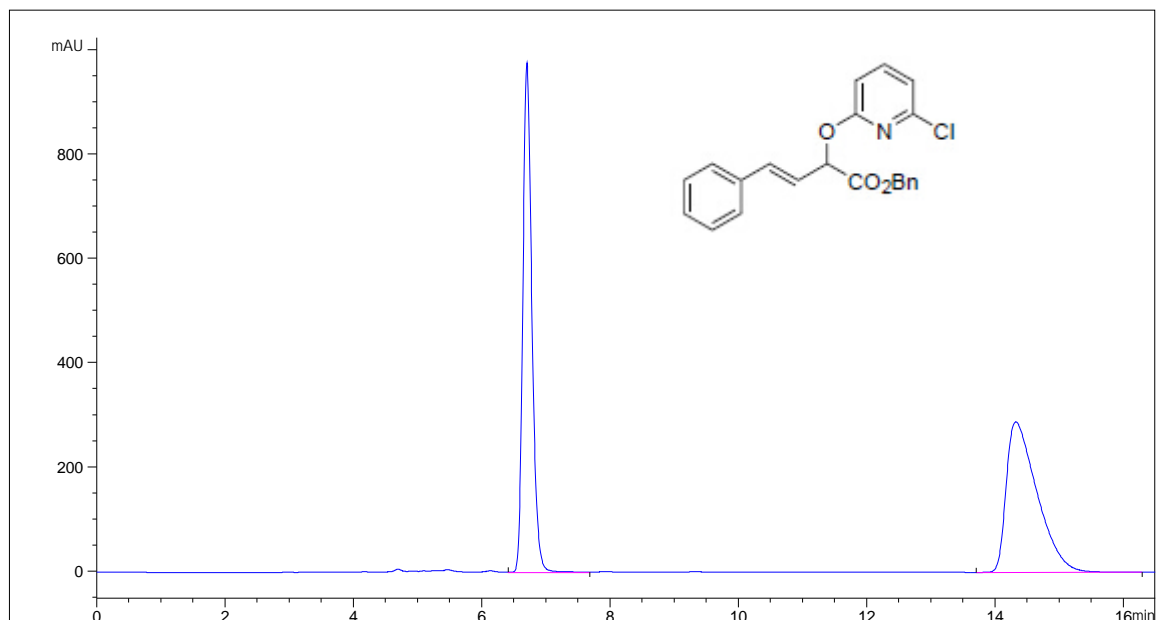

信号 1: DAD1 A, Sig=254,4 Ref=off

| 峰 # | 保留时间 [min] | 类型 | 峰宽 [min] | 峰面积 [mAU*s] | 峰面积 %   | 名称 |
|-----|------------|----|----------|-------------|---------|----|
| 1   | 6.706      | VB | 0.1506   | 9602.67676  | 49.9357 | ?  |
| 2   | 14.326     | VB | 0.5068   | 9627.40820  | 50.0643 | ?  |

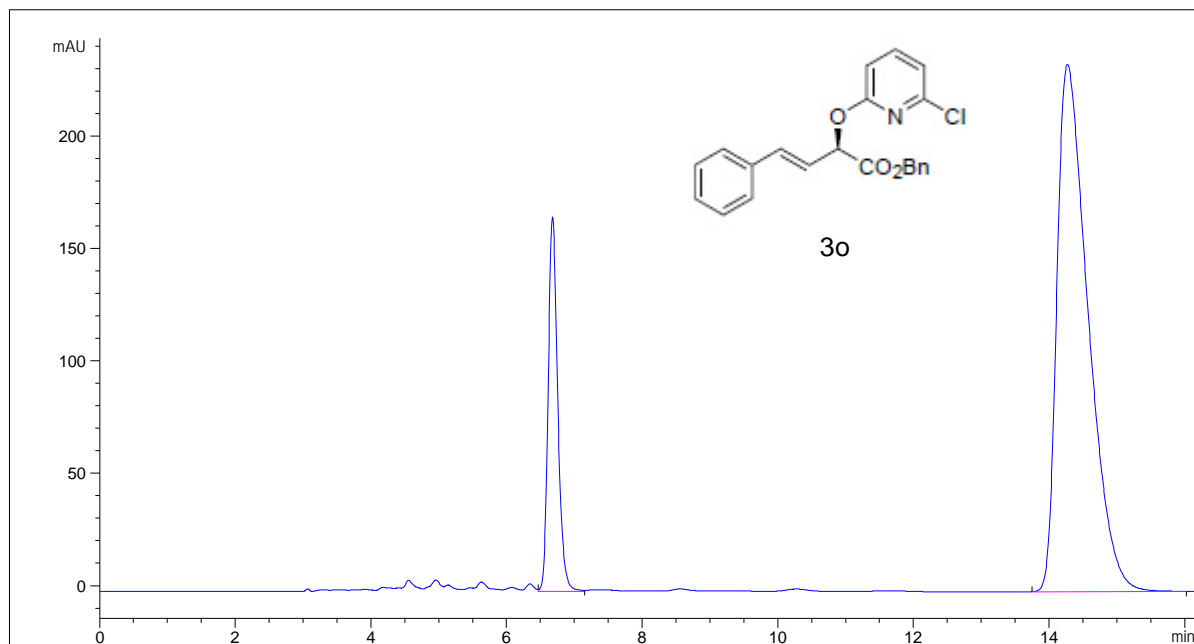

信号 1: DAD1 A, Sig=254,4 Ref=off

| 峰 # | 保留时间 [min] | 类型 | 峰宽 [min] | 峰面积 [mAU*s] | 峰面积 %   | 名称 |
|-----|------------|----|----------|-------------|---------|----|
| 1   | 6.679      | VV | 0.1507   | 1637.01379  | 17.9657 | ?  |
| 2   | 14.272     | BB | 0.4878   | 7474.87646  | 82.0343 | ?  |

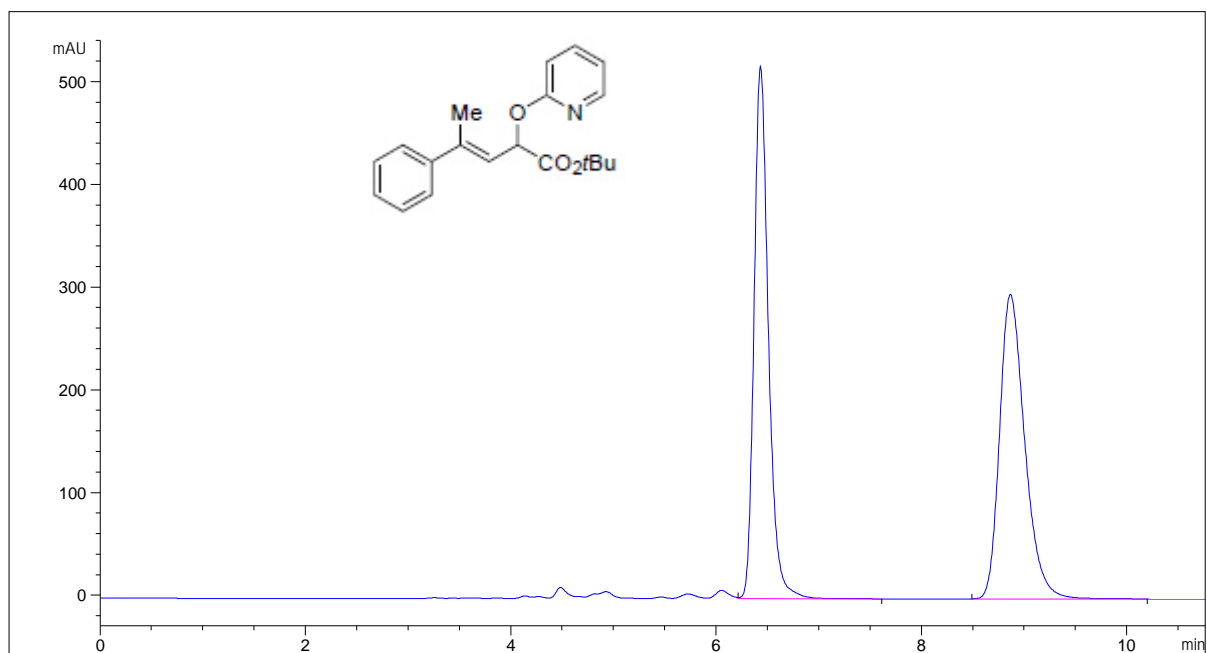

信号 1: DAD1 A, Sig=254, 4 Ref=off

| 峰 # | 保留时间 [min] | 类型 | 峰宽 [min] | 峰面积 [mAU*s] | 峰面积 %   | 名称 |
|-----|------------|----|----------|-------------|---------|----|
| 1   | 6.433      | VB | 0.1496   | 5044.84180  | 50.0212 | ?  |
| 2   | 8.867      | BB | 0.2604   | 5040.56250  | 49.9788 | ?  |

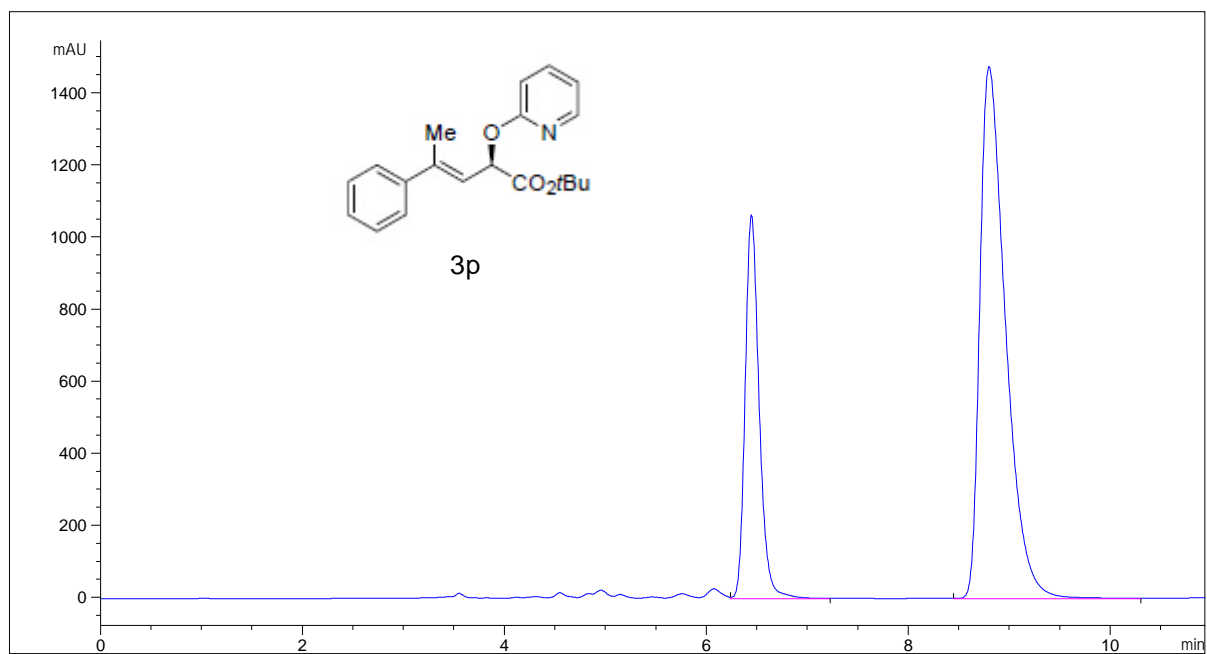

信号 1: DAD1 A, Sig=254, 4 Ref=off

| 峰 # | 保留时间 [min] | 类型 | 峰宽 [min] | 峰面积 [mAU*s] | 峰面积 %   | 名称 |
|-----|------------|----|----------|-------------|---------|----|
| 1   | 6.448      | VV | 0.1488   | 1.02979e4   | 28.2676 | ?  |
| 2   | 8.802      | VB | 0.2706   | 2.61321e4   | 71.7324 | ?  |

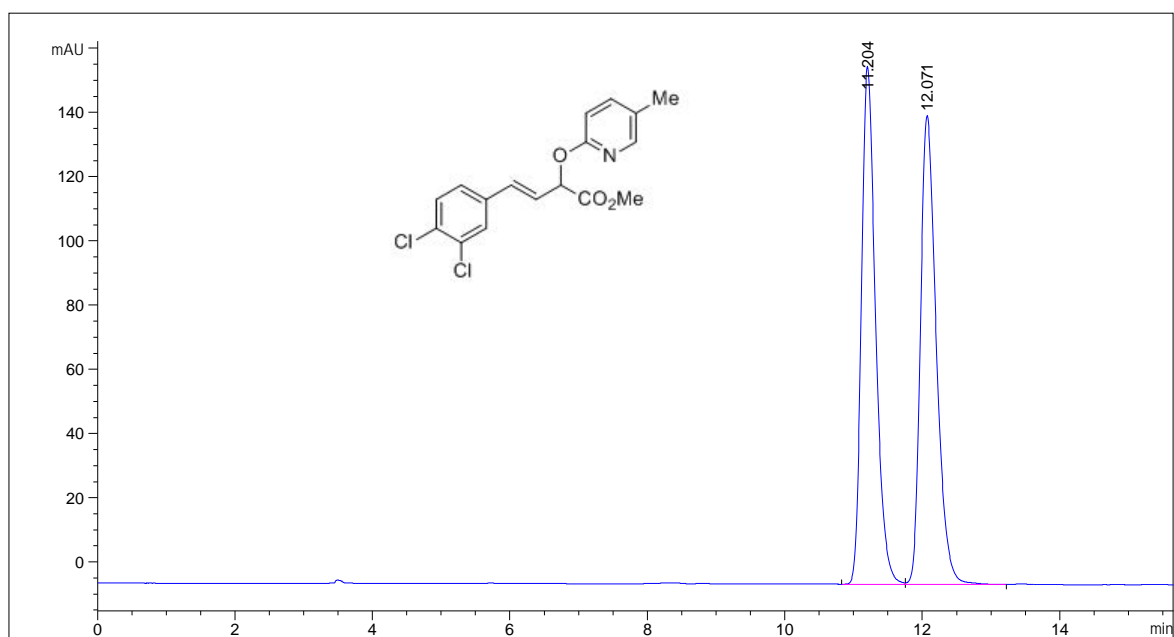

信号 1: DAD1 A, Sig=254,4 Ref=off

| 峰 # | 保留时间 [min] | 类型 | 峰宽 [min] | 峰面积 [mAU*s] | 峰高 [mAU]  | 峰面积 %   |
|-----|------------|----|----------|-------------|-----------|---------|
| 1   | 11.204     | BV | 0.2187   | 2303.74854  | 161.23346 | 49.5767 |
| 2   | 12.071     | VV | 0.2453   | 2343.09302  | 145.98354 | 50.4233 |

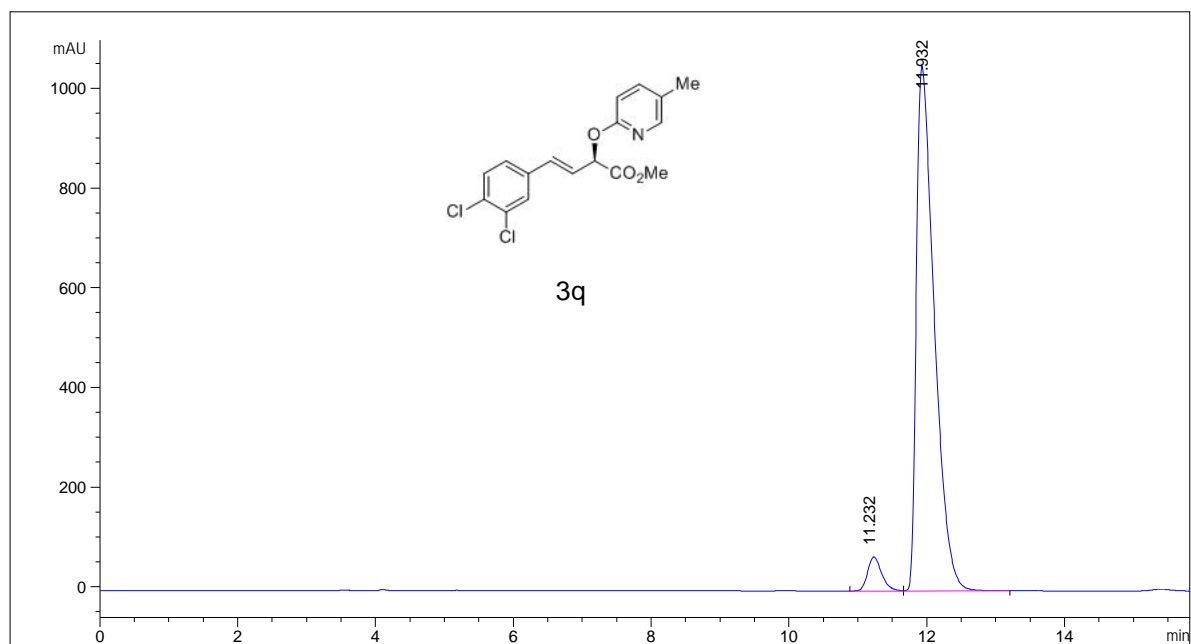

信号 1: DAD1 A, Sig=254,4 Ref=off

| 峰 # | 保留时间 [min] | 类型 | 峰宽 [min] | 峰面积 [mAU*s] | 峰高 [mAU]   | 峰面积 %   |
|-----|------------|----|----------|-------------|------------|---------|
| 1   | 11.232     | BV | 0.2173   | 966.39264   | 68.19072   | 4.8593  |
| 2   | 11.932     | VB | 0.2736   | 1.89210e4   | 1053.05518 | 95.1407 |
